# Supplementary material for: Iodine-promoted synthesis of CF3-substituted dihydroimidazobenzimidazole and CF3-dihydroimidazoindole via C–N bond formation
Source: Royal Society of Chemistry journal article supplement (doi:10.1039/d3ob01124k), 2023-01-01

## Supporting Information

### **Iodine-Promoted Synthesis of CF<sub>3</sub>-substituted Dihydroimidazobenzimidazole and CF<sub>3</sub>-Dihydroimidazoindole via C-N Bond Formation**

Daiki Komatsu, Kasumi Yamada, Takeshi Hanamoto\*<sup>a</sup>

*Department of Chemistry and Applied Chemistry, Saga University,  
Honjyo-machi 1, Saga 840-8502, Japan*

[hanamoto@cc.saga-u.ac.jp](mailto:hanamoto@cc.saga-u.ac.jp)

<sup>1</sup>H, <sup>13</sup>C, and <sup>19</sup>F-NMR spectra for compound 3a – 3h, 4a – 4h, 6a – 6l, 7a – 7l, 8a: S2 – S124

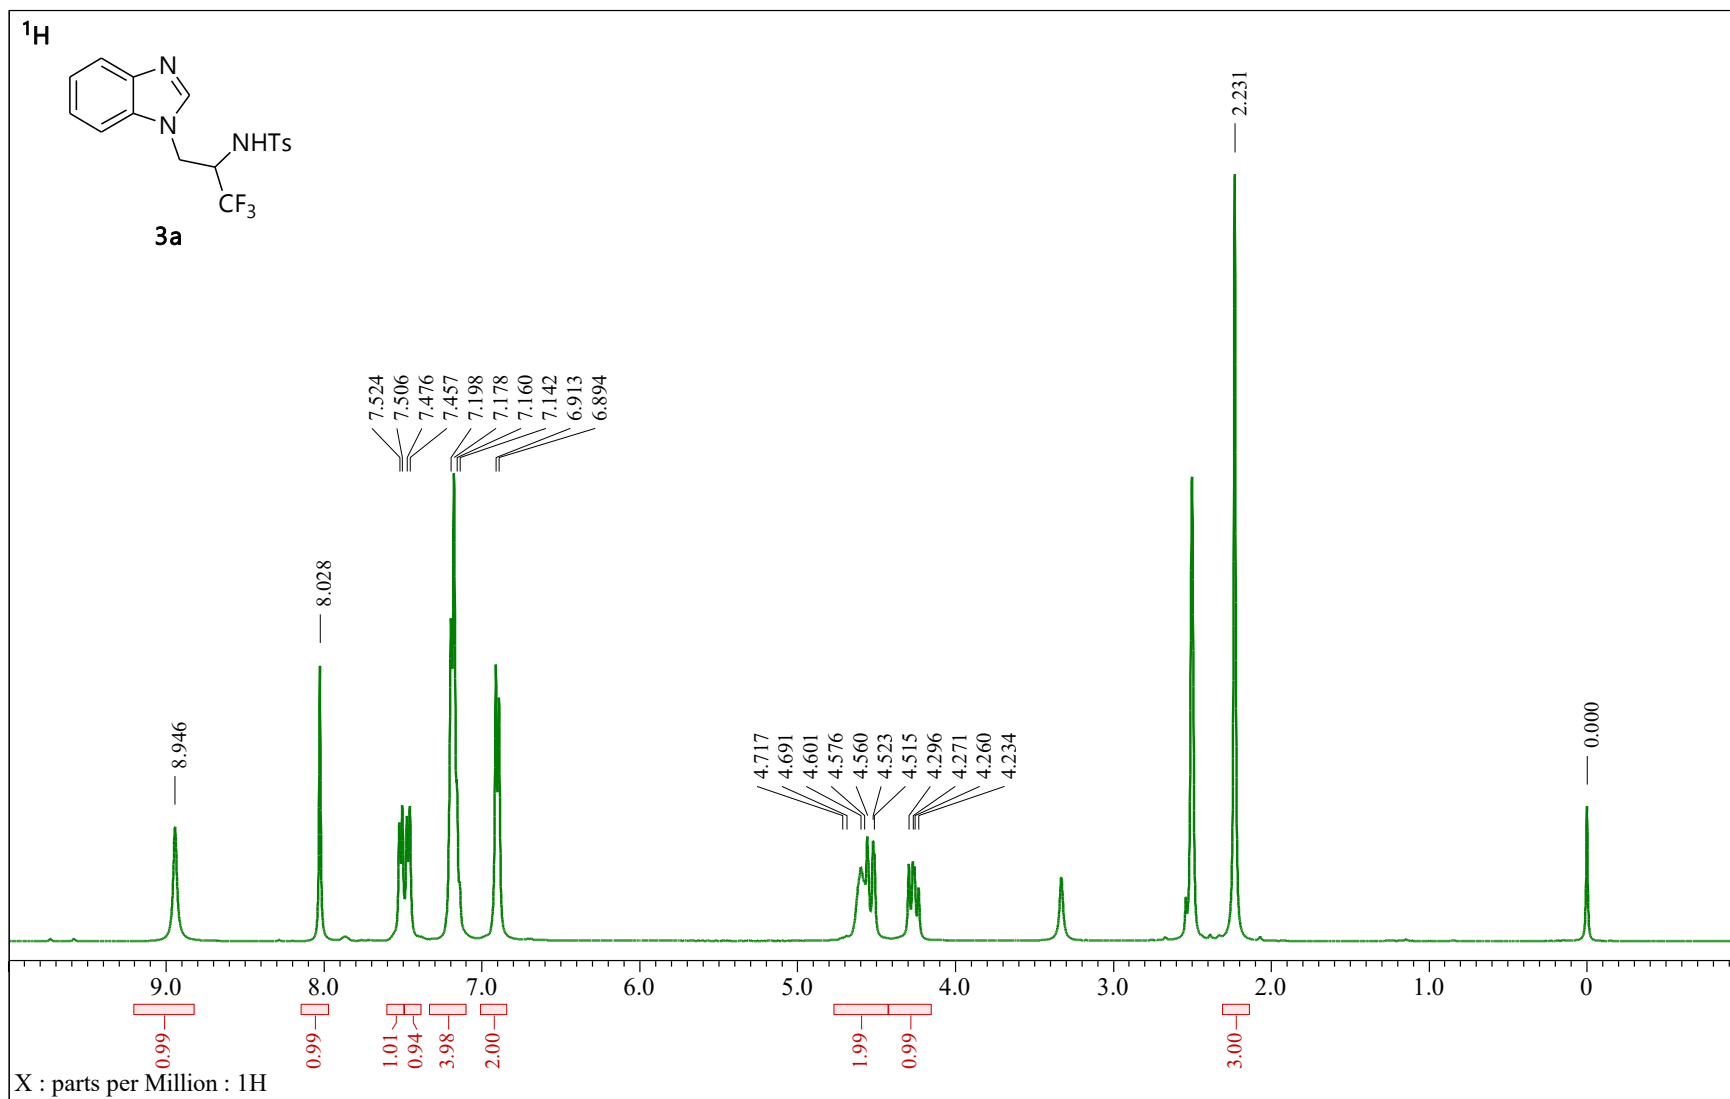

<sup>13</sup>C

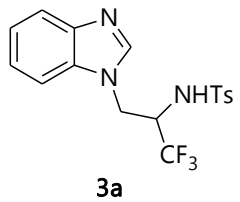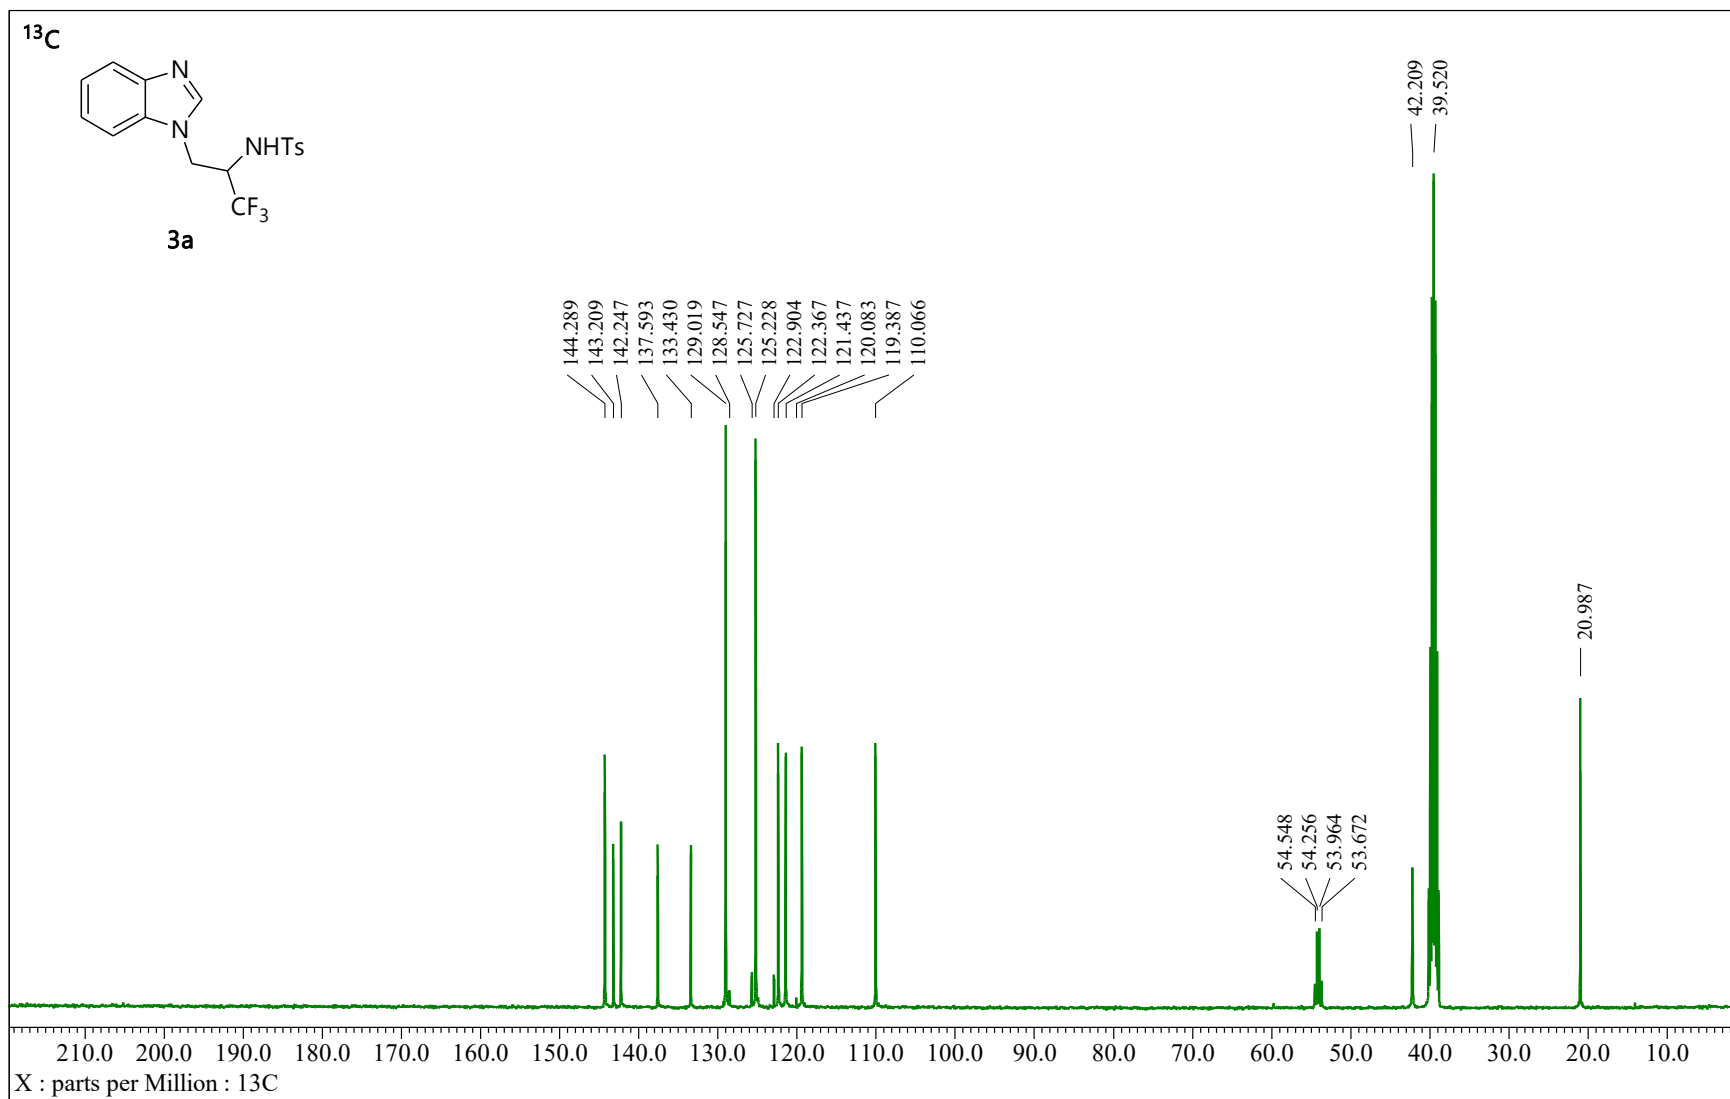

<sup>19</sup>F

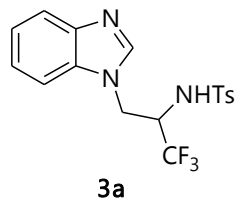

-73.609  
-73.627

-163.000

-40.0 -50.0 -60.0 -70.0 -80.0 -90.0 -100.0 -110.0 -120.0 -130.0 -140.0 -150.0 -160.0 -170.0 -180.0 -190.0 -200.0 -210.0 -220.0 -230.0 -240.0 -250.0

X : parts per Million : <sup>19</sup>F



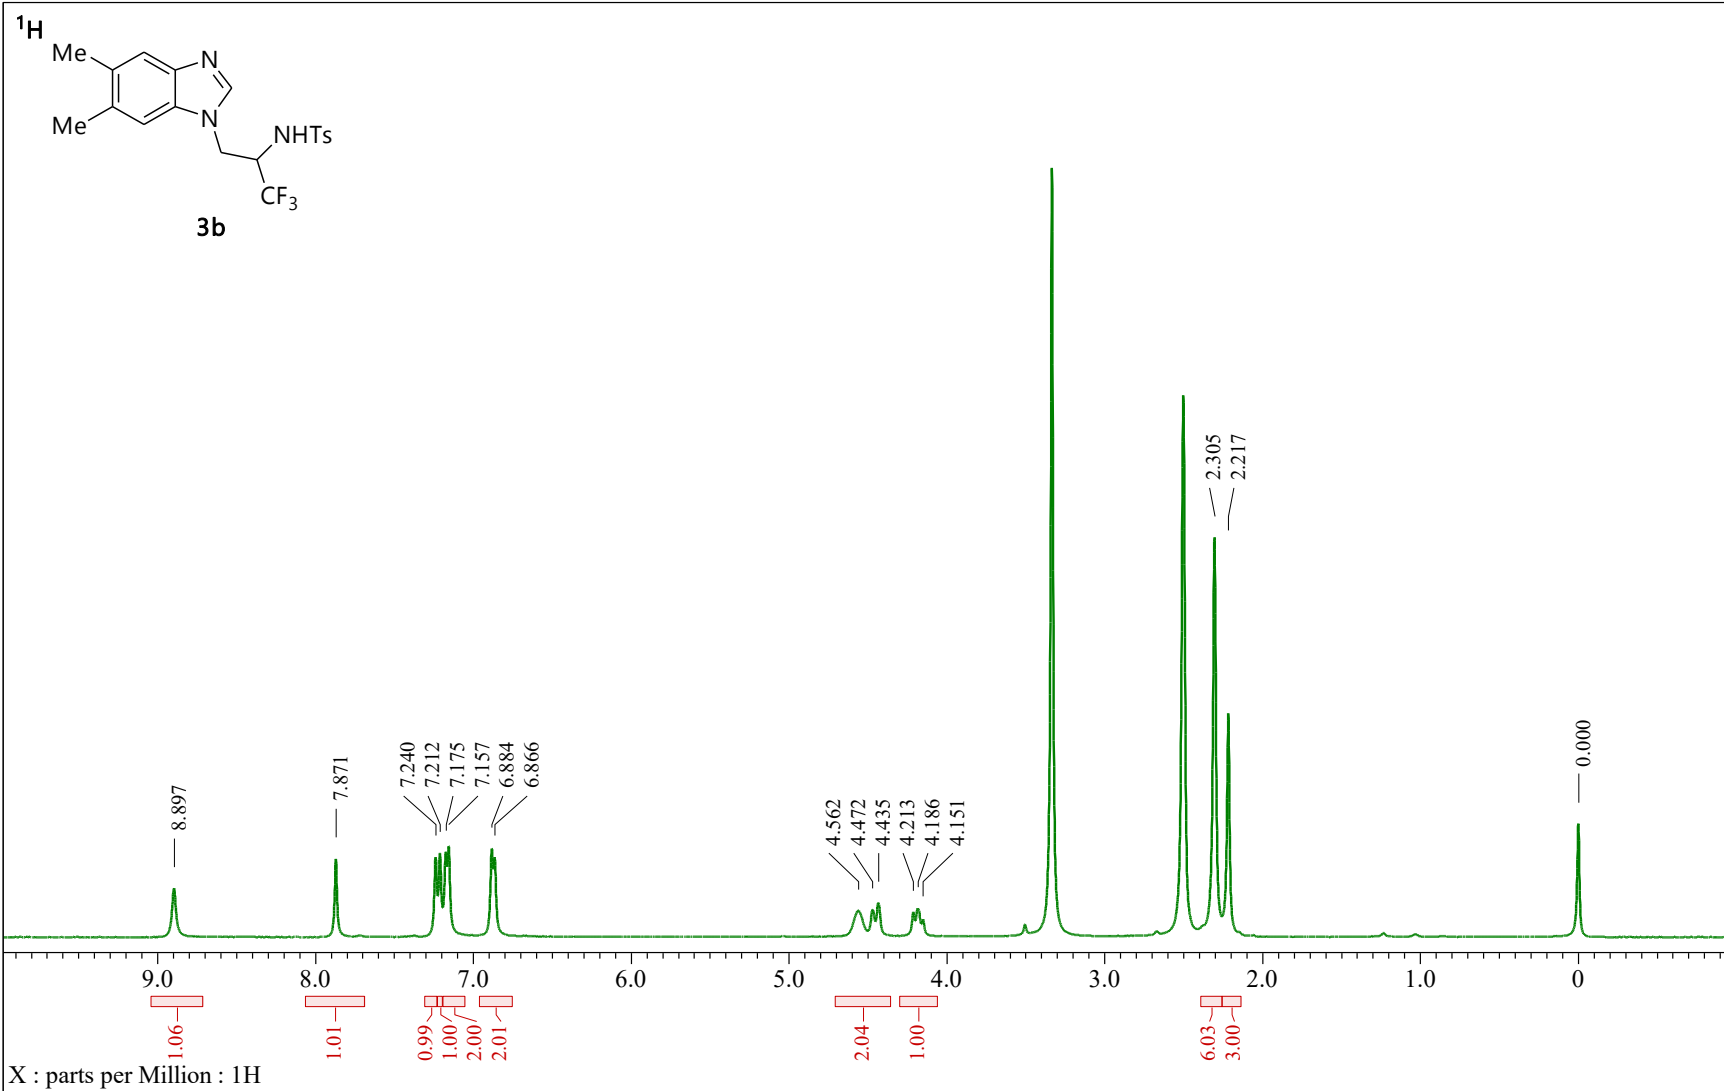

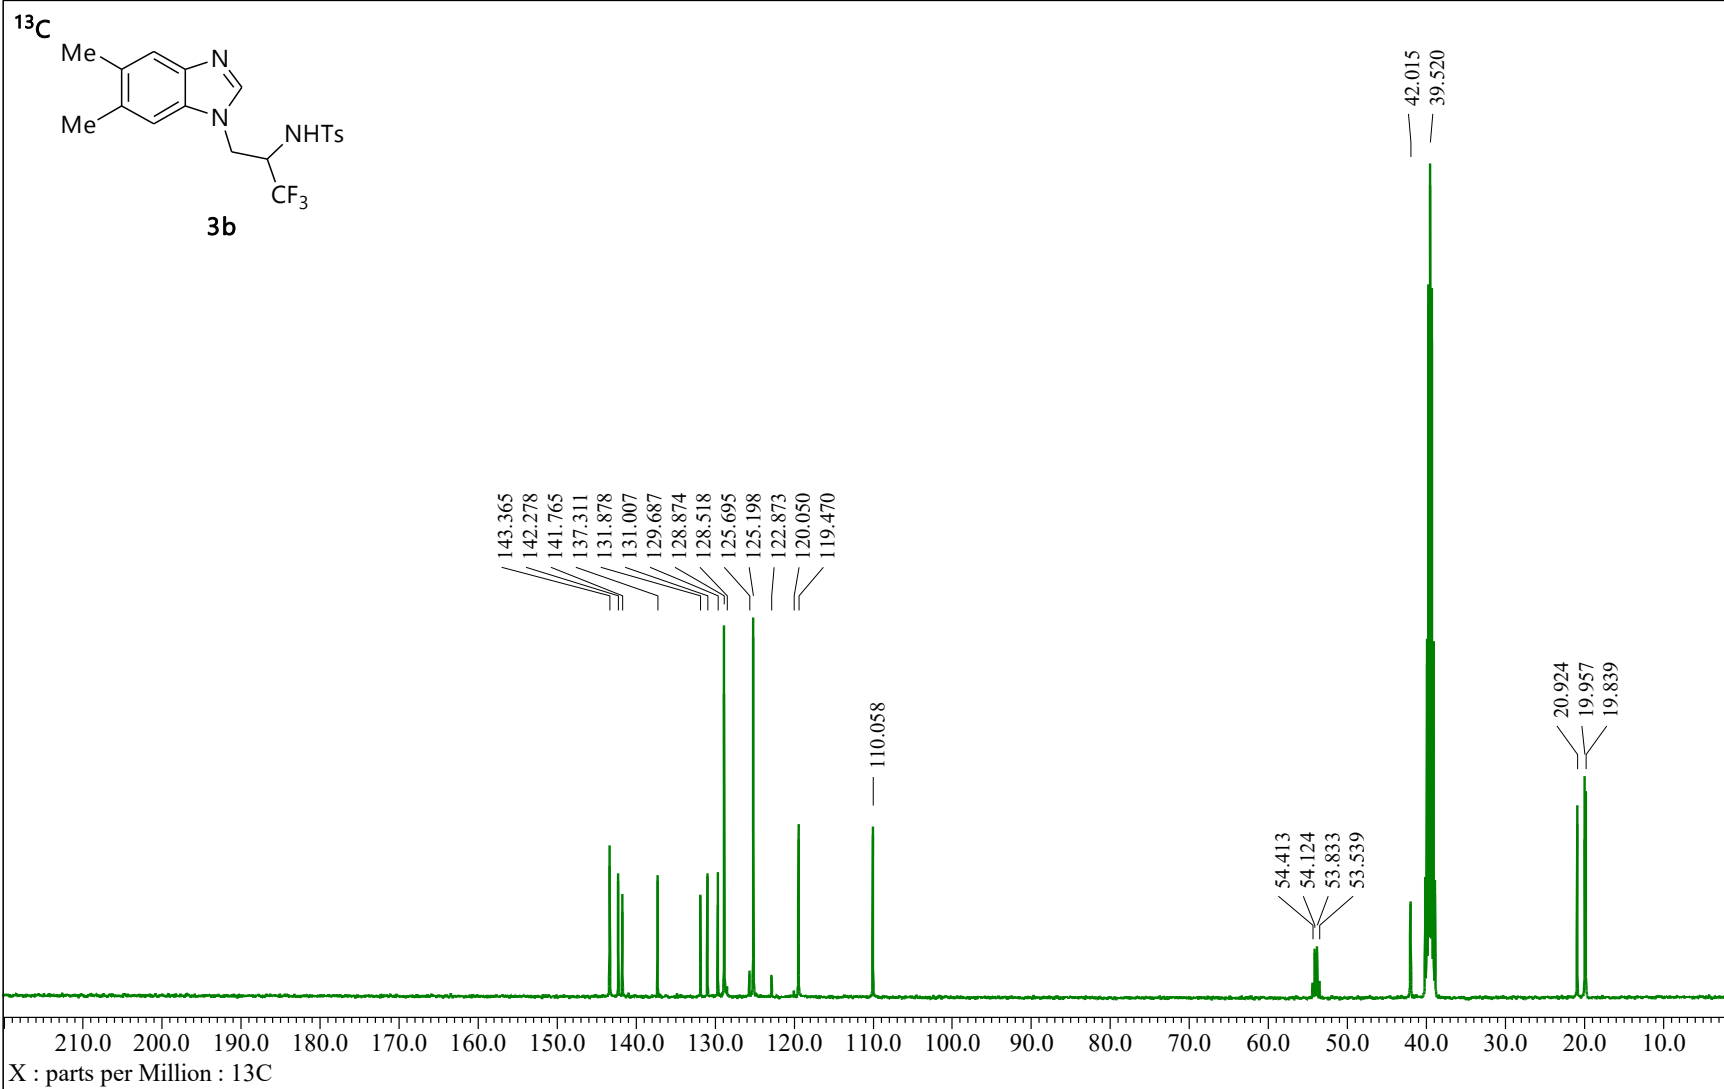

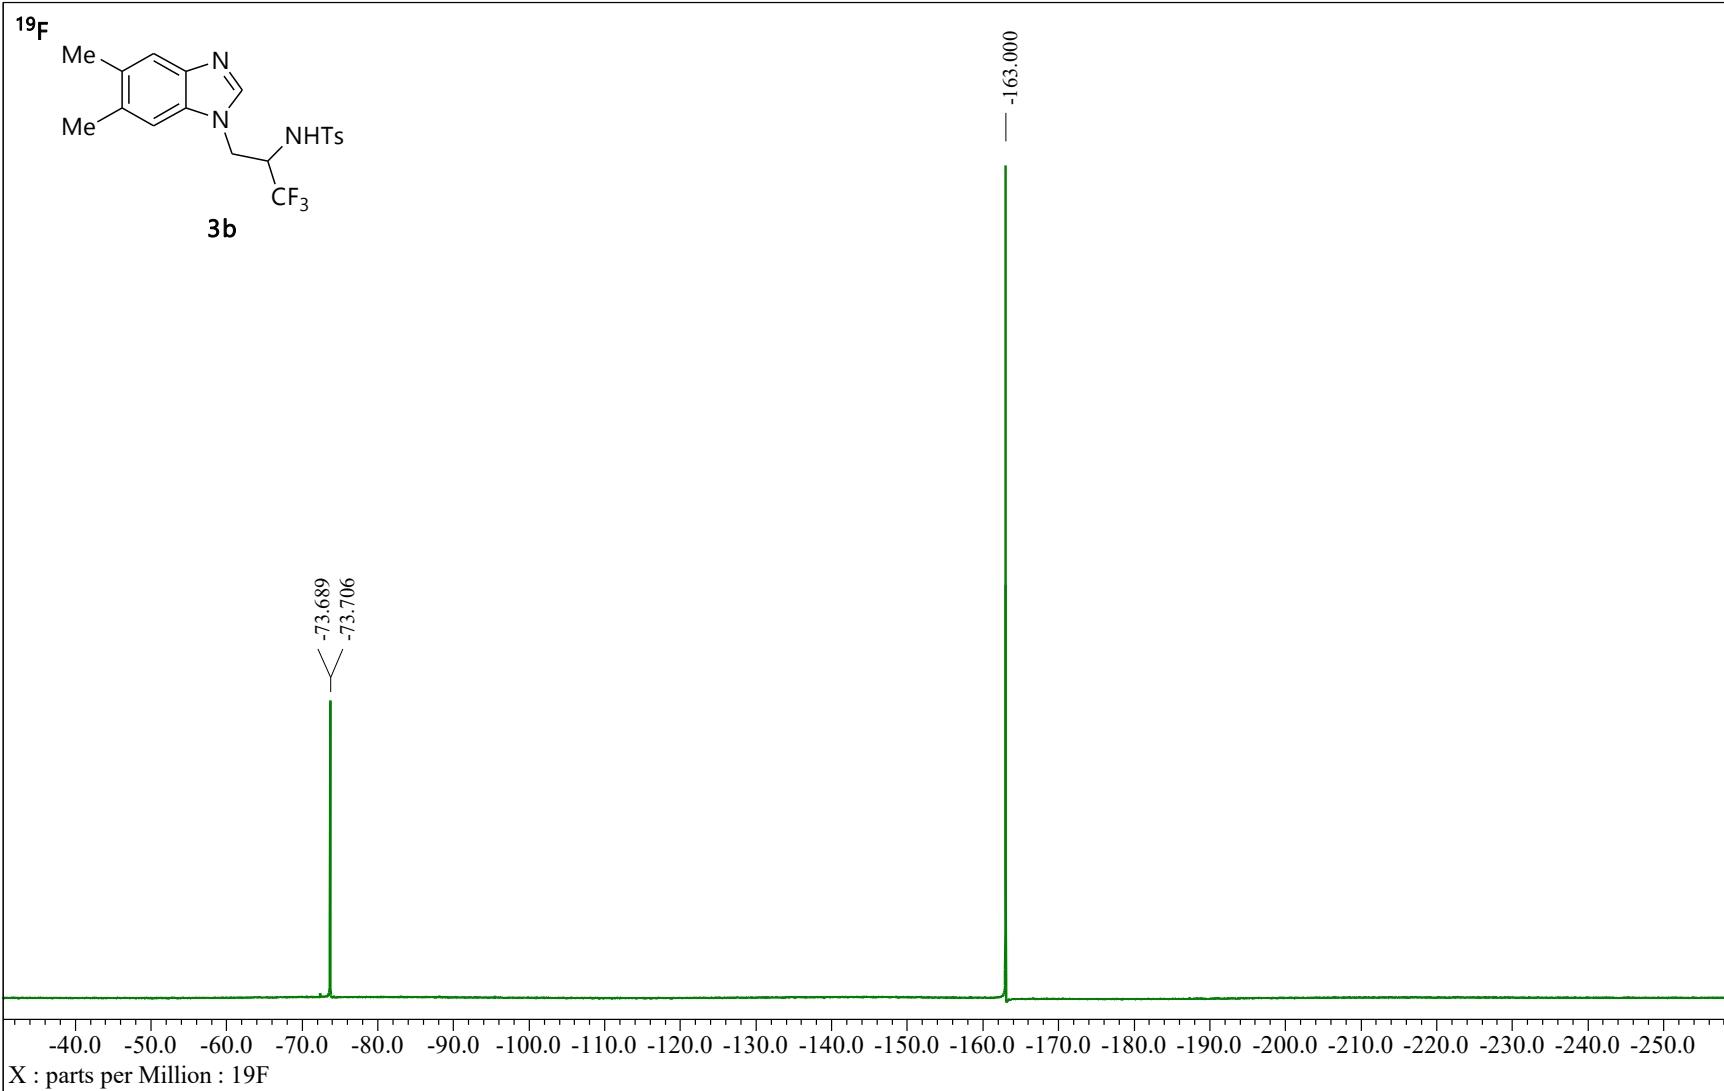

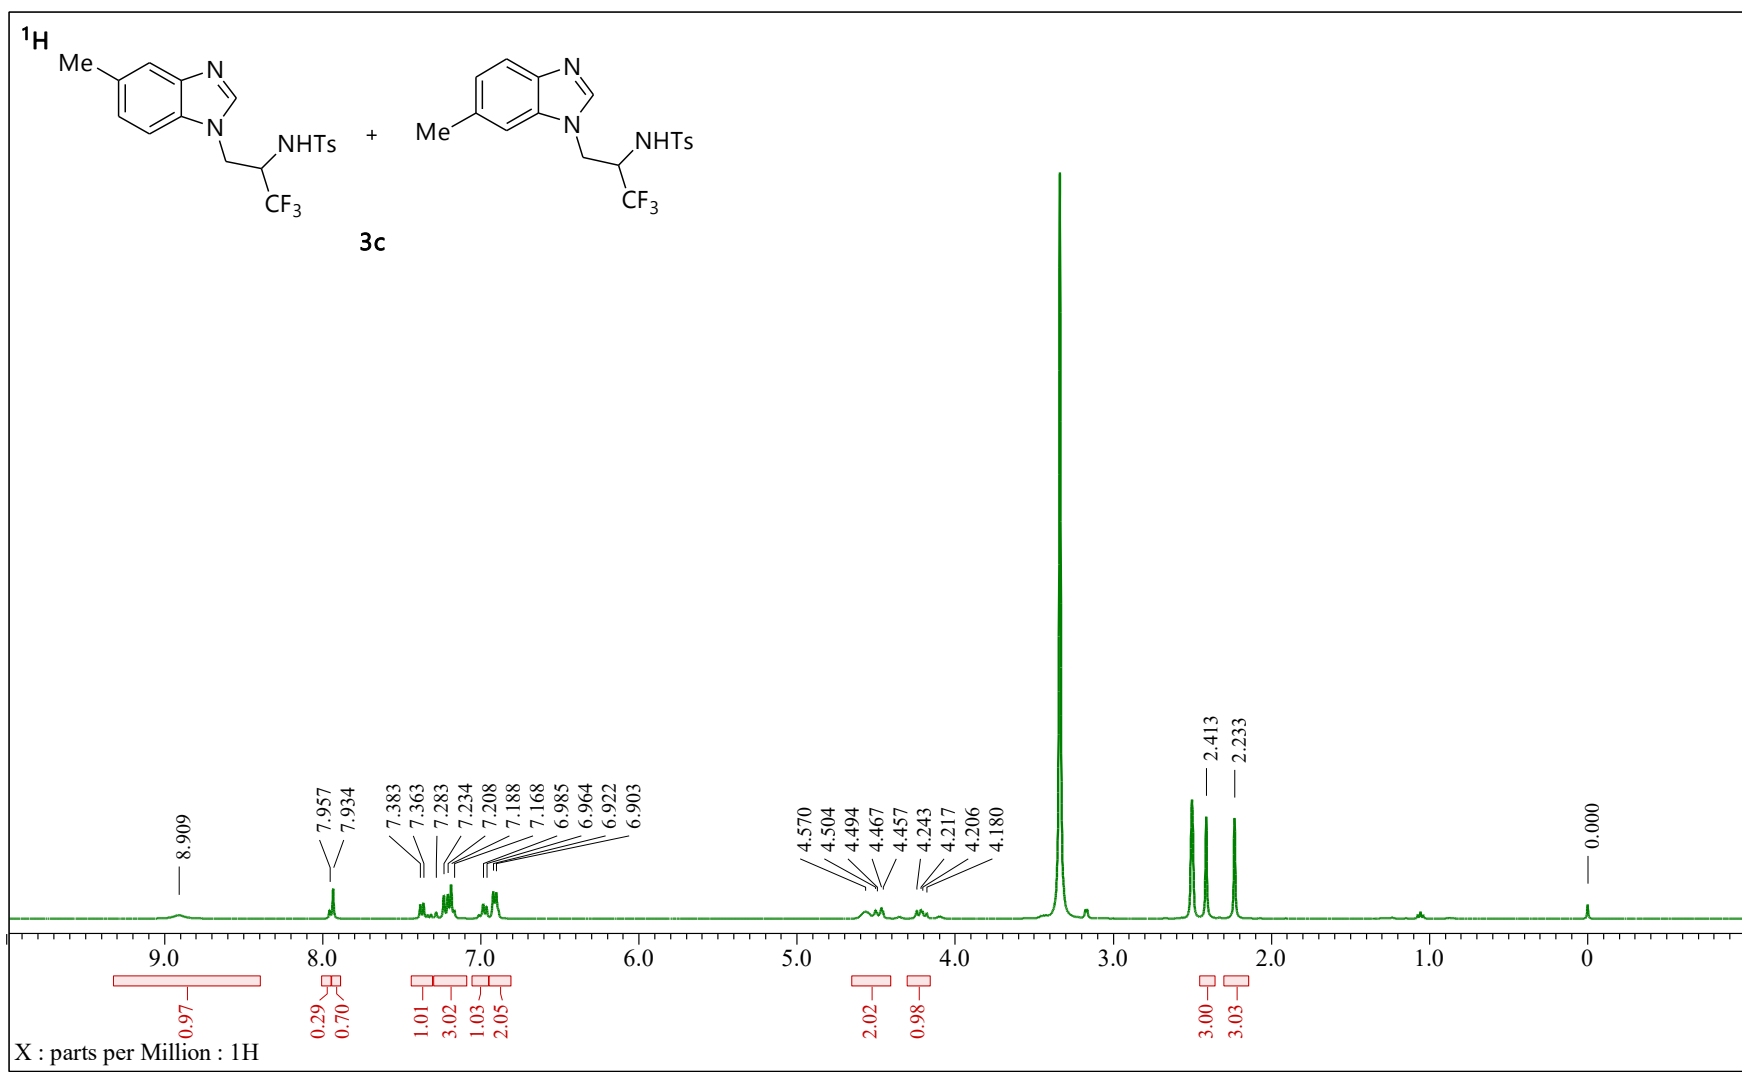

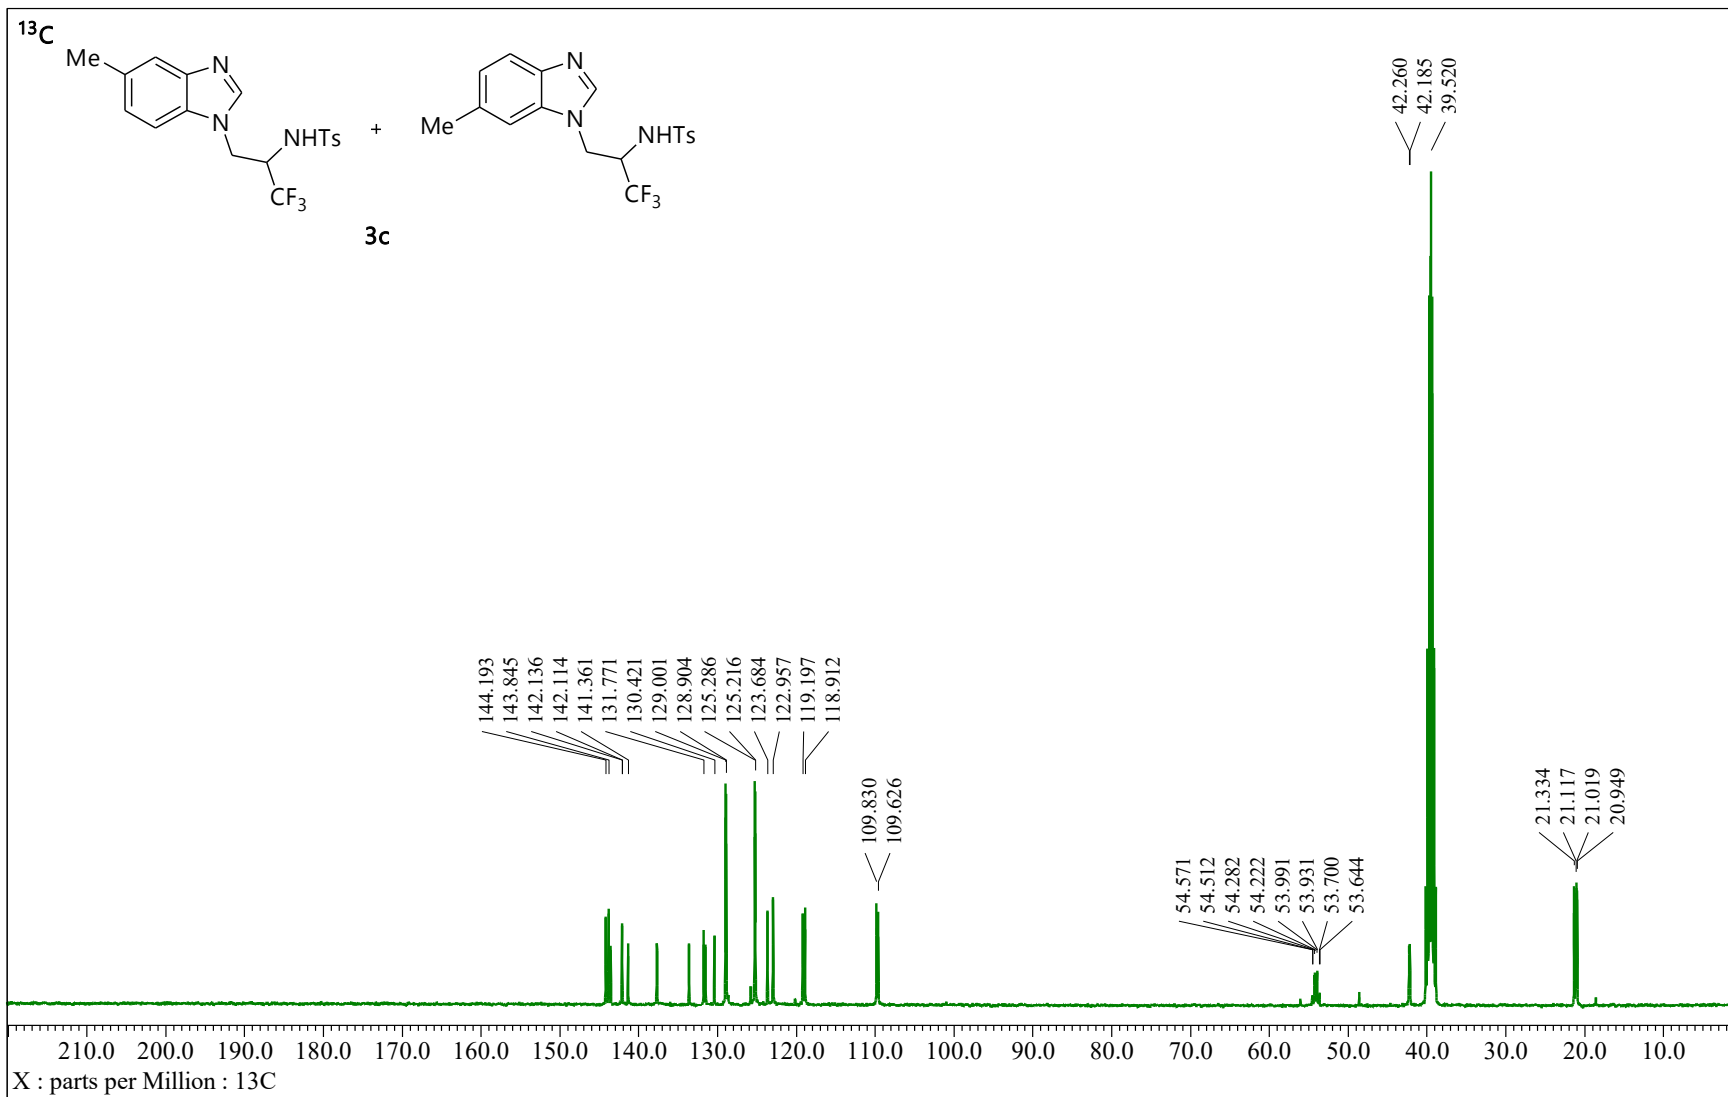

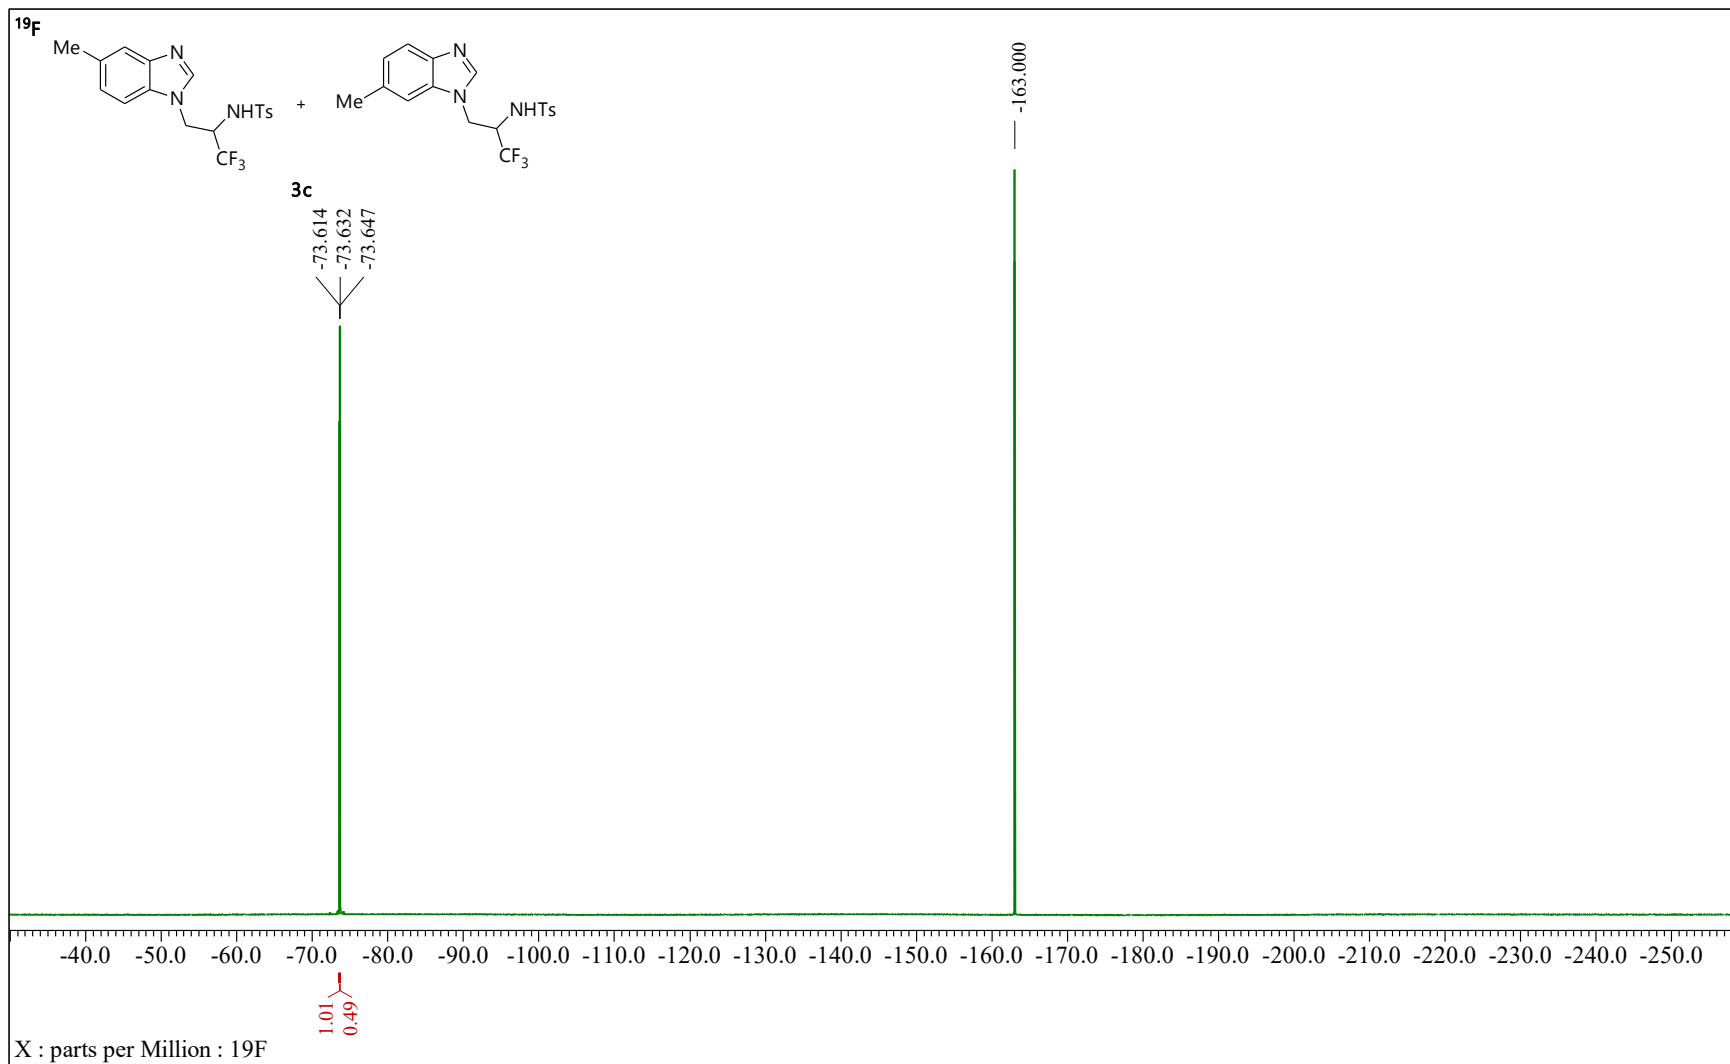

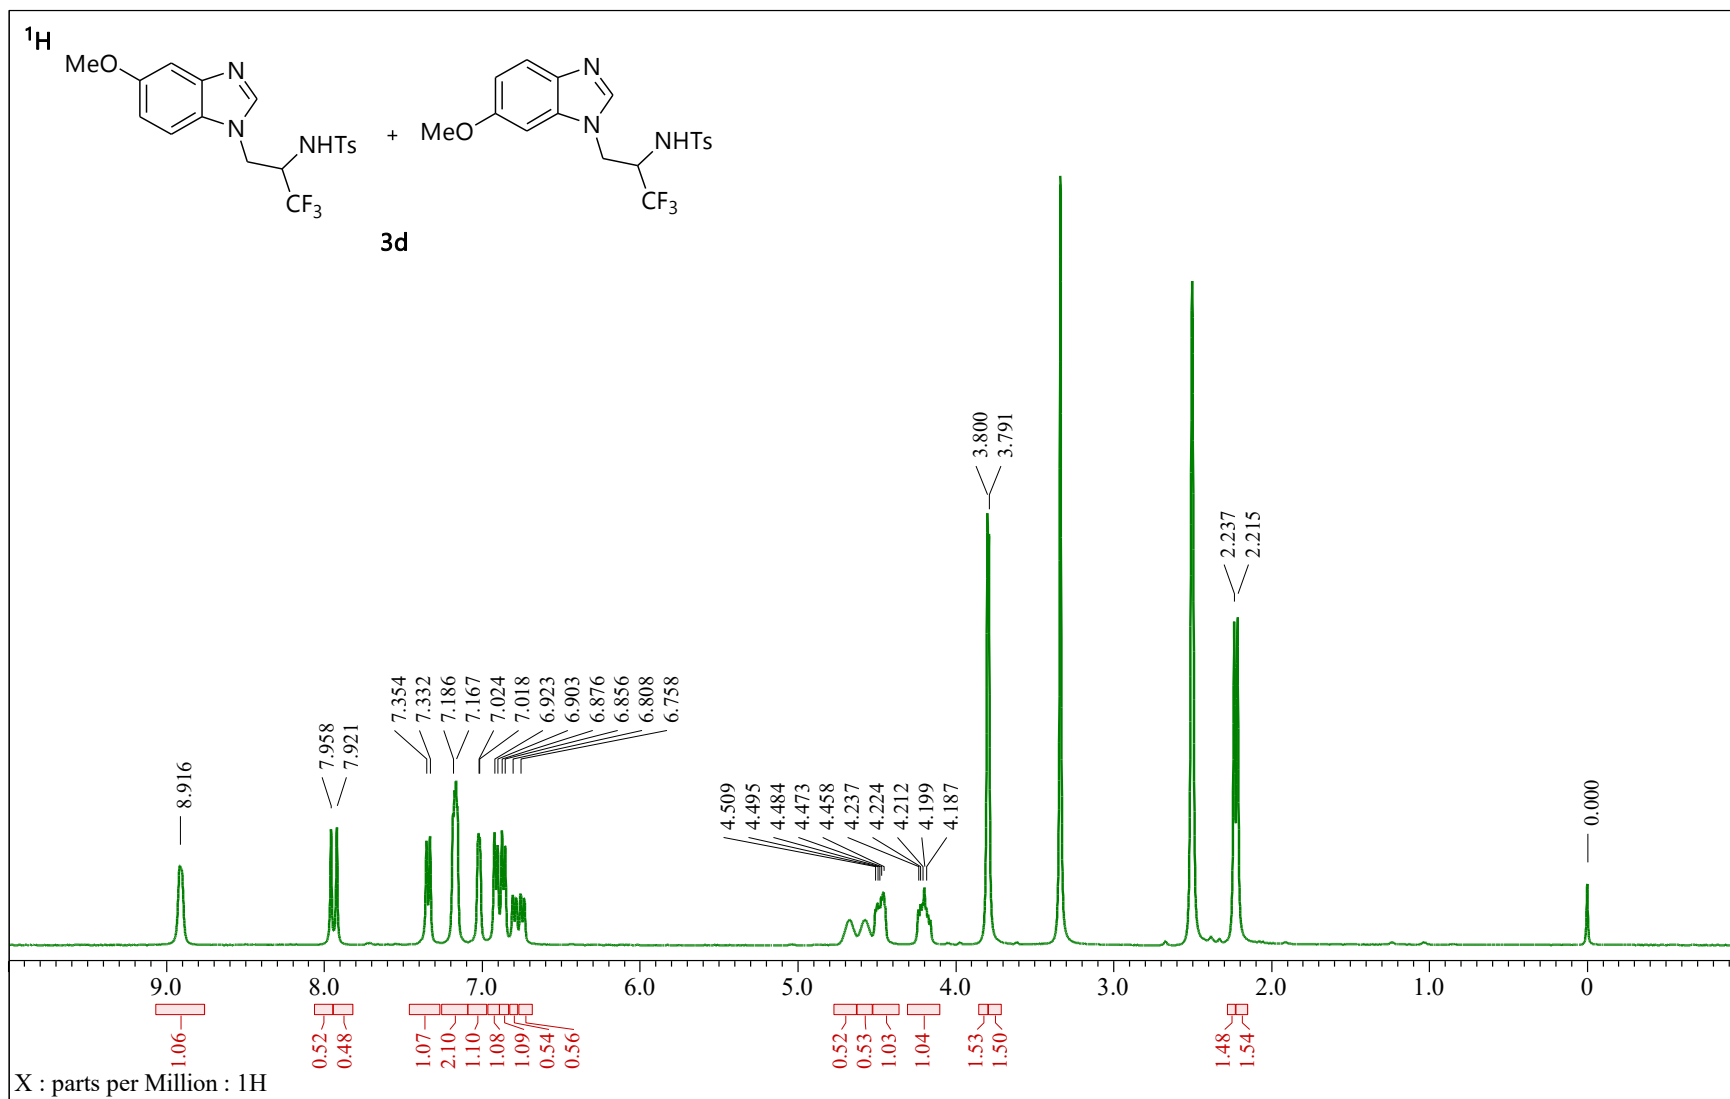

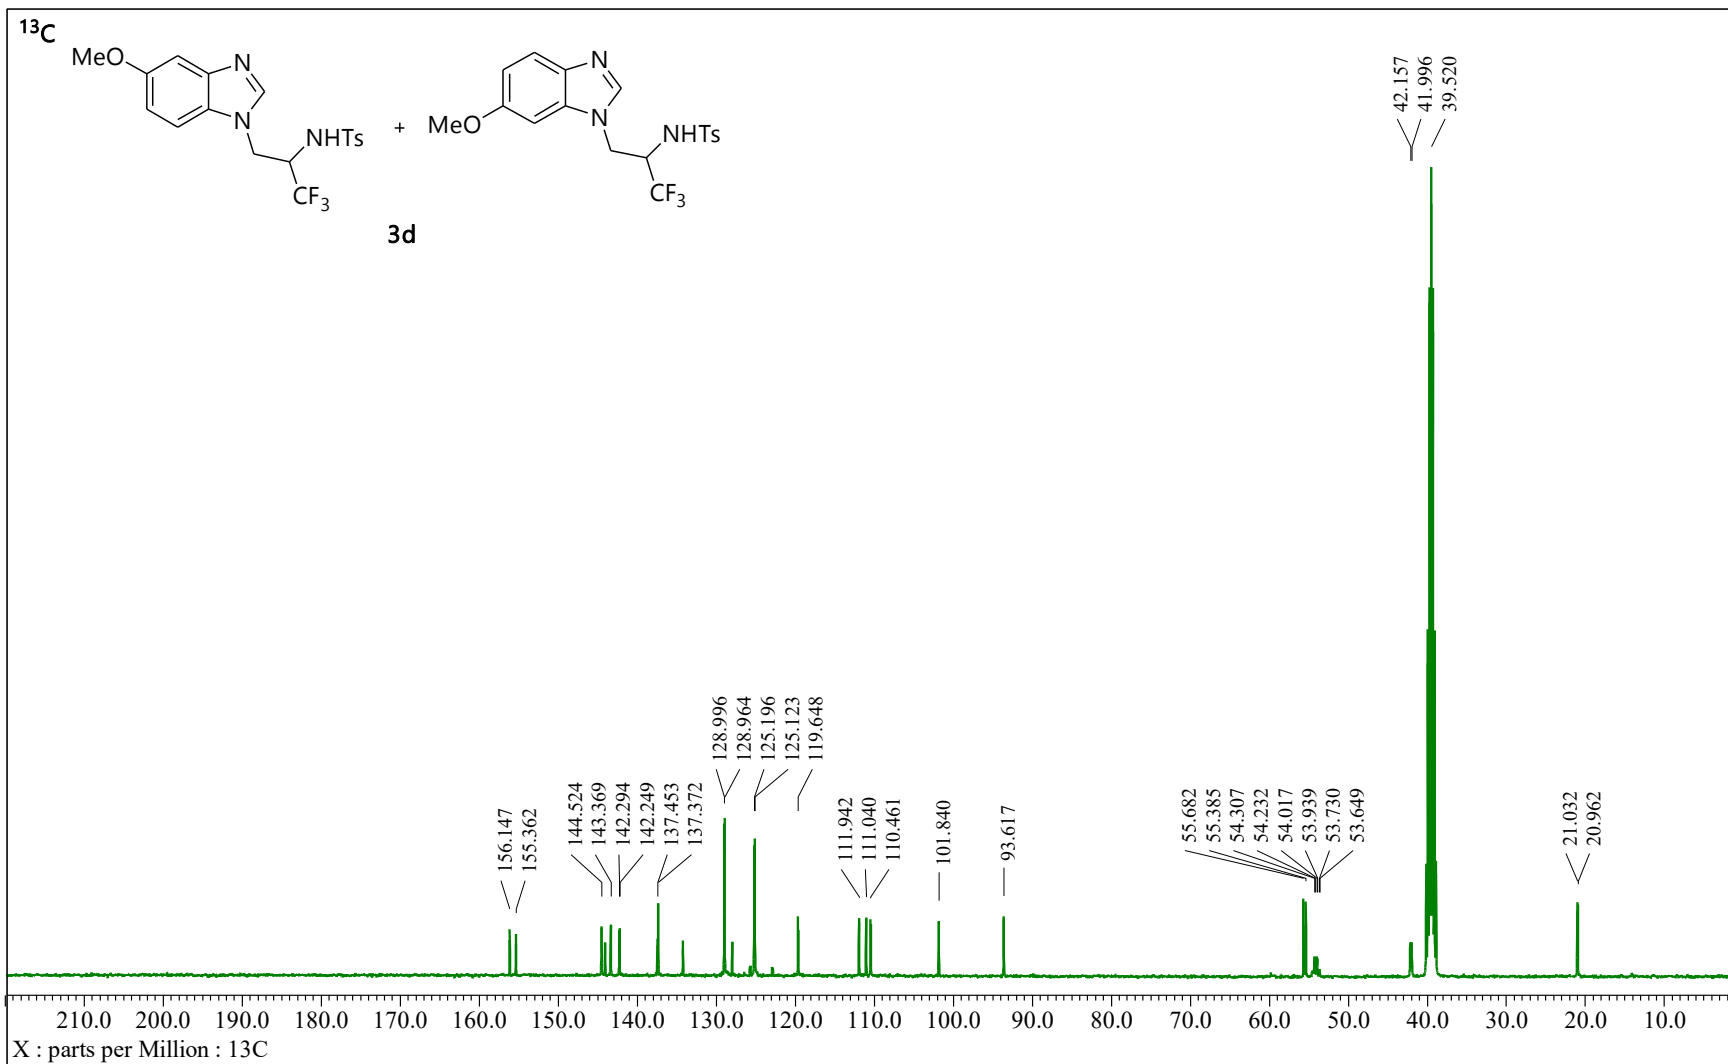



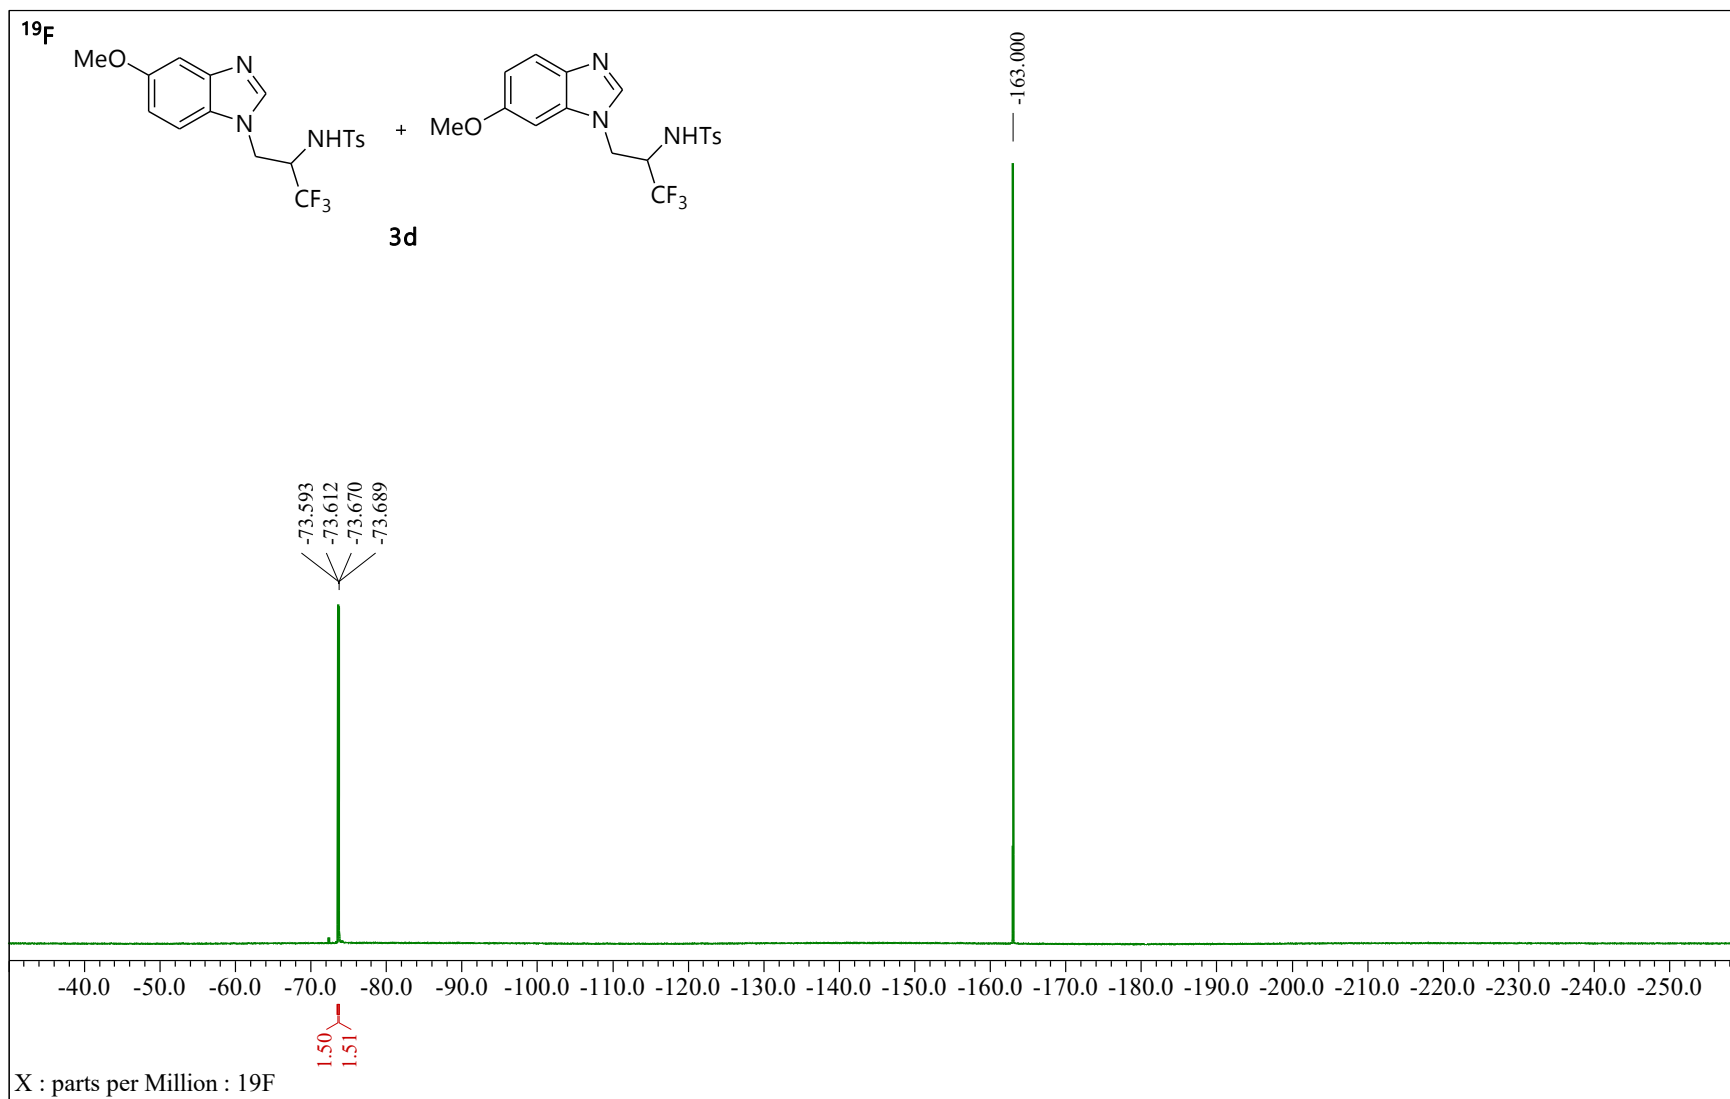

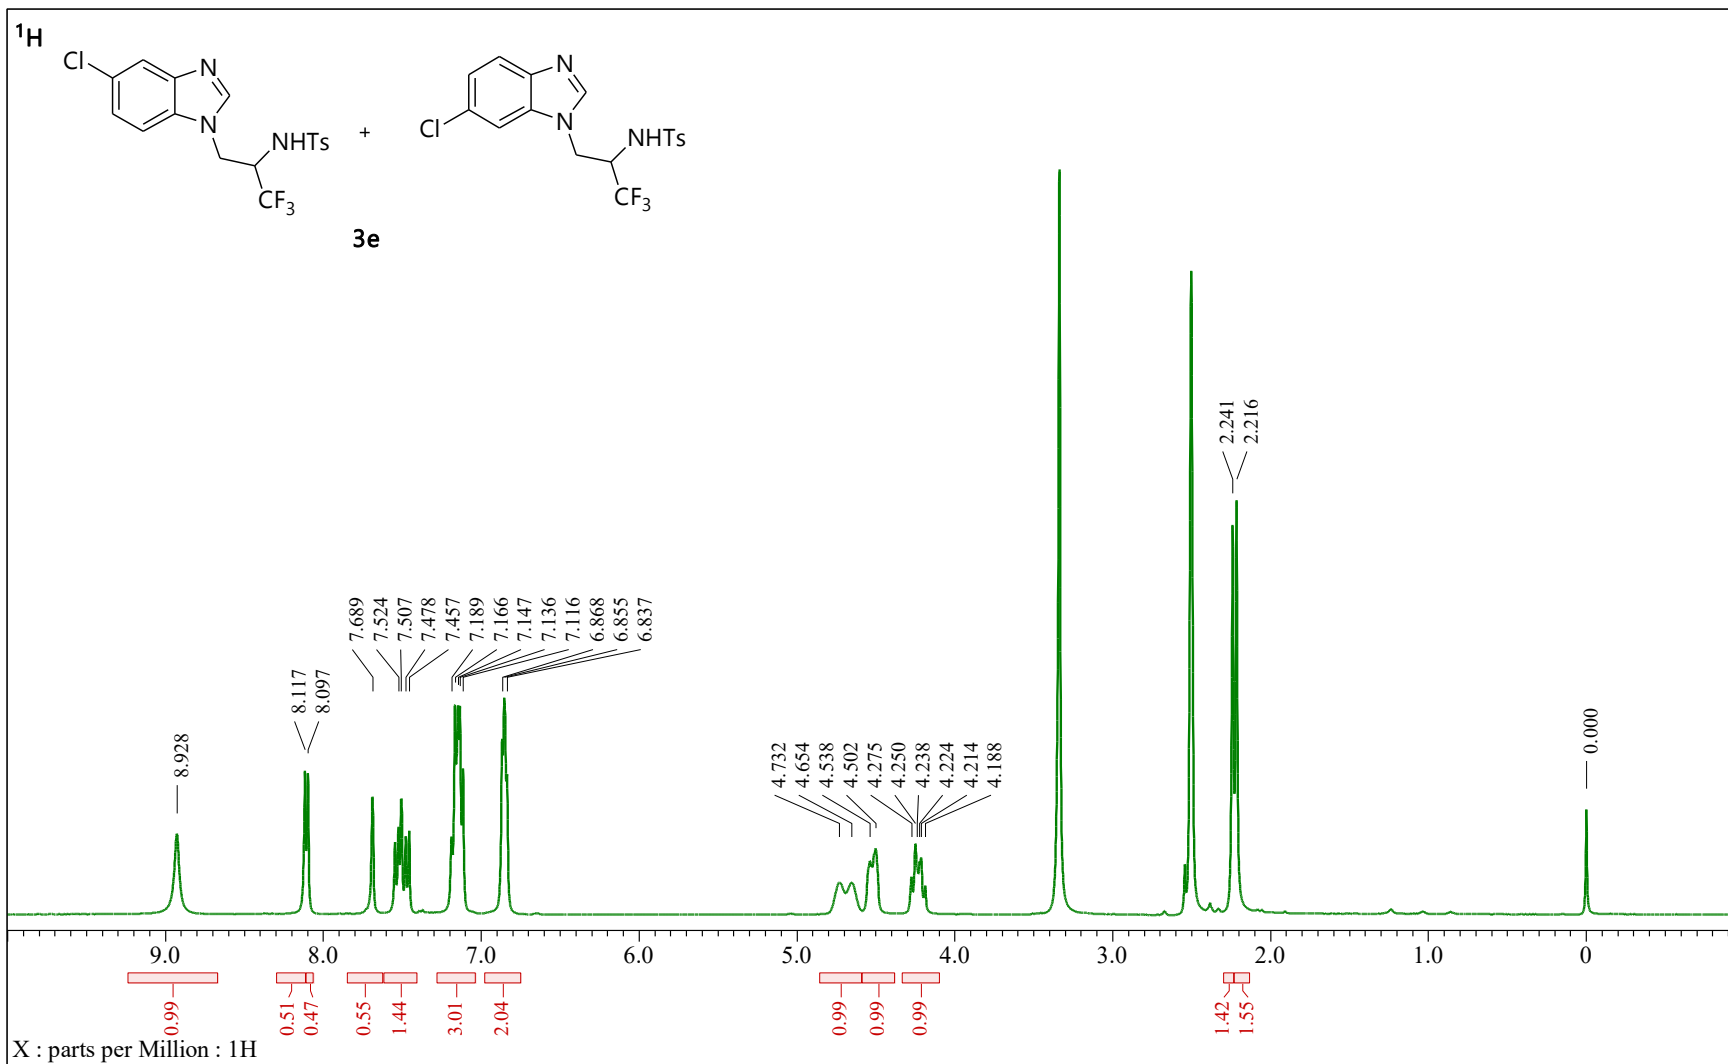

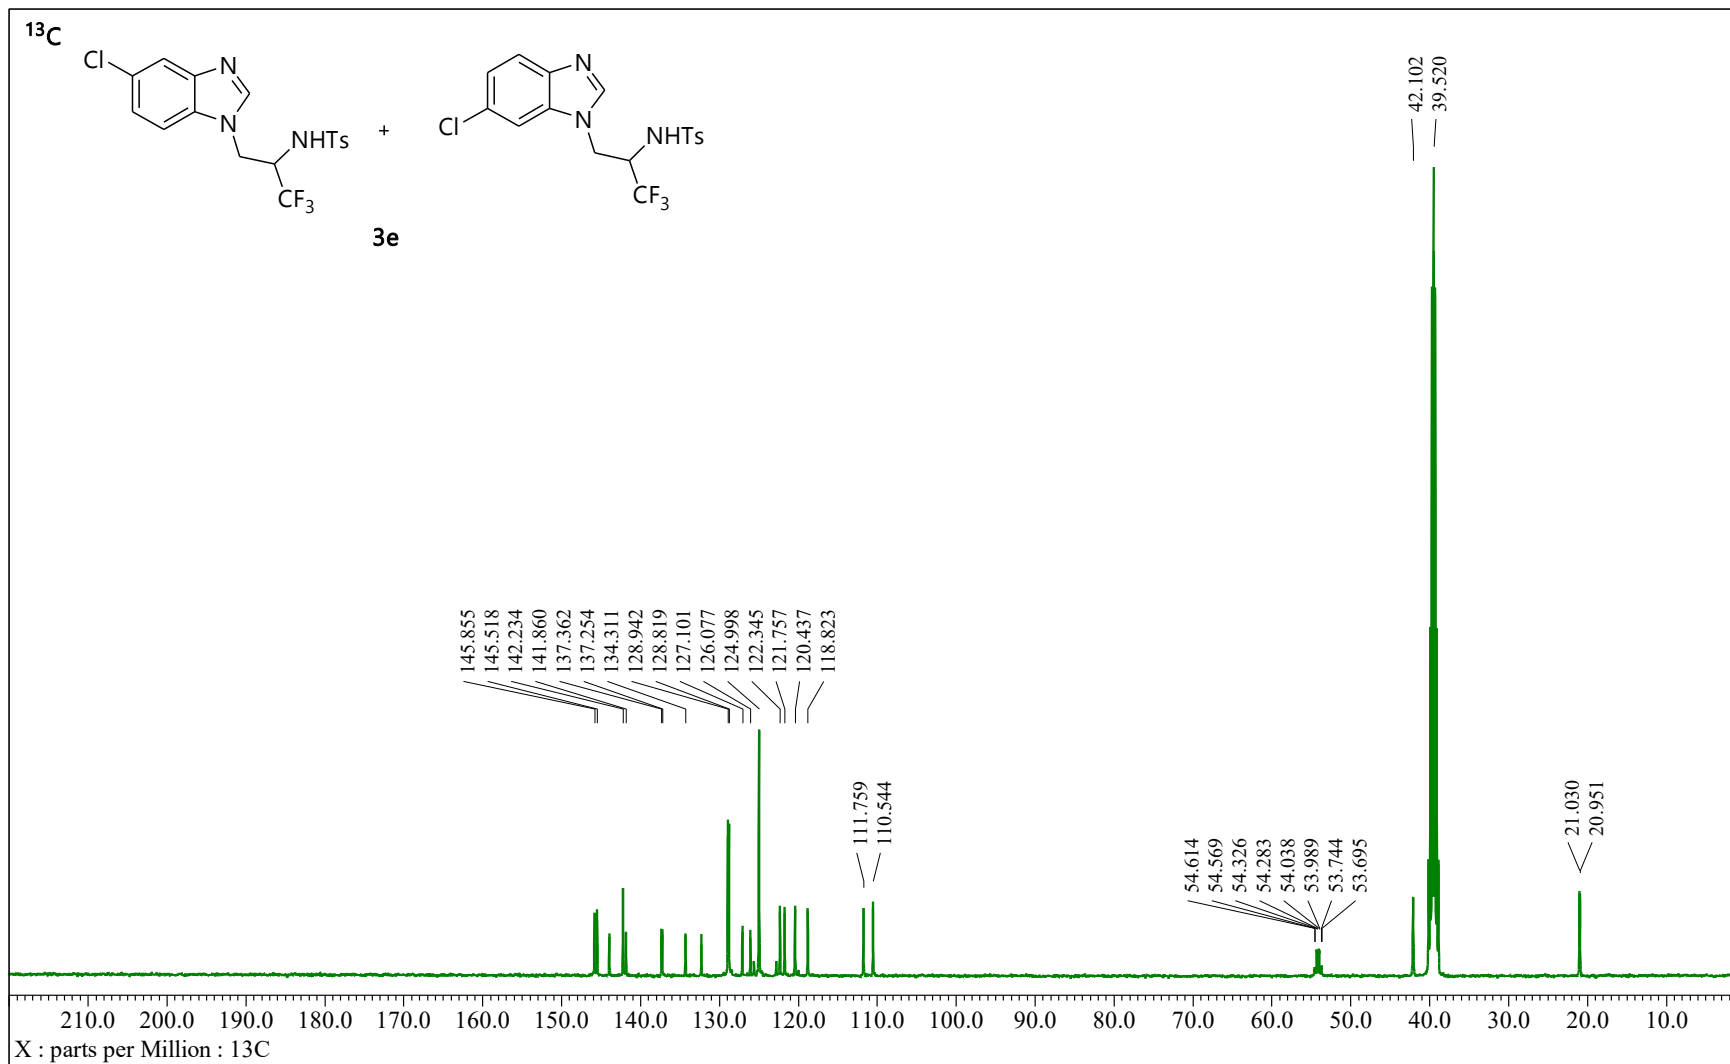

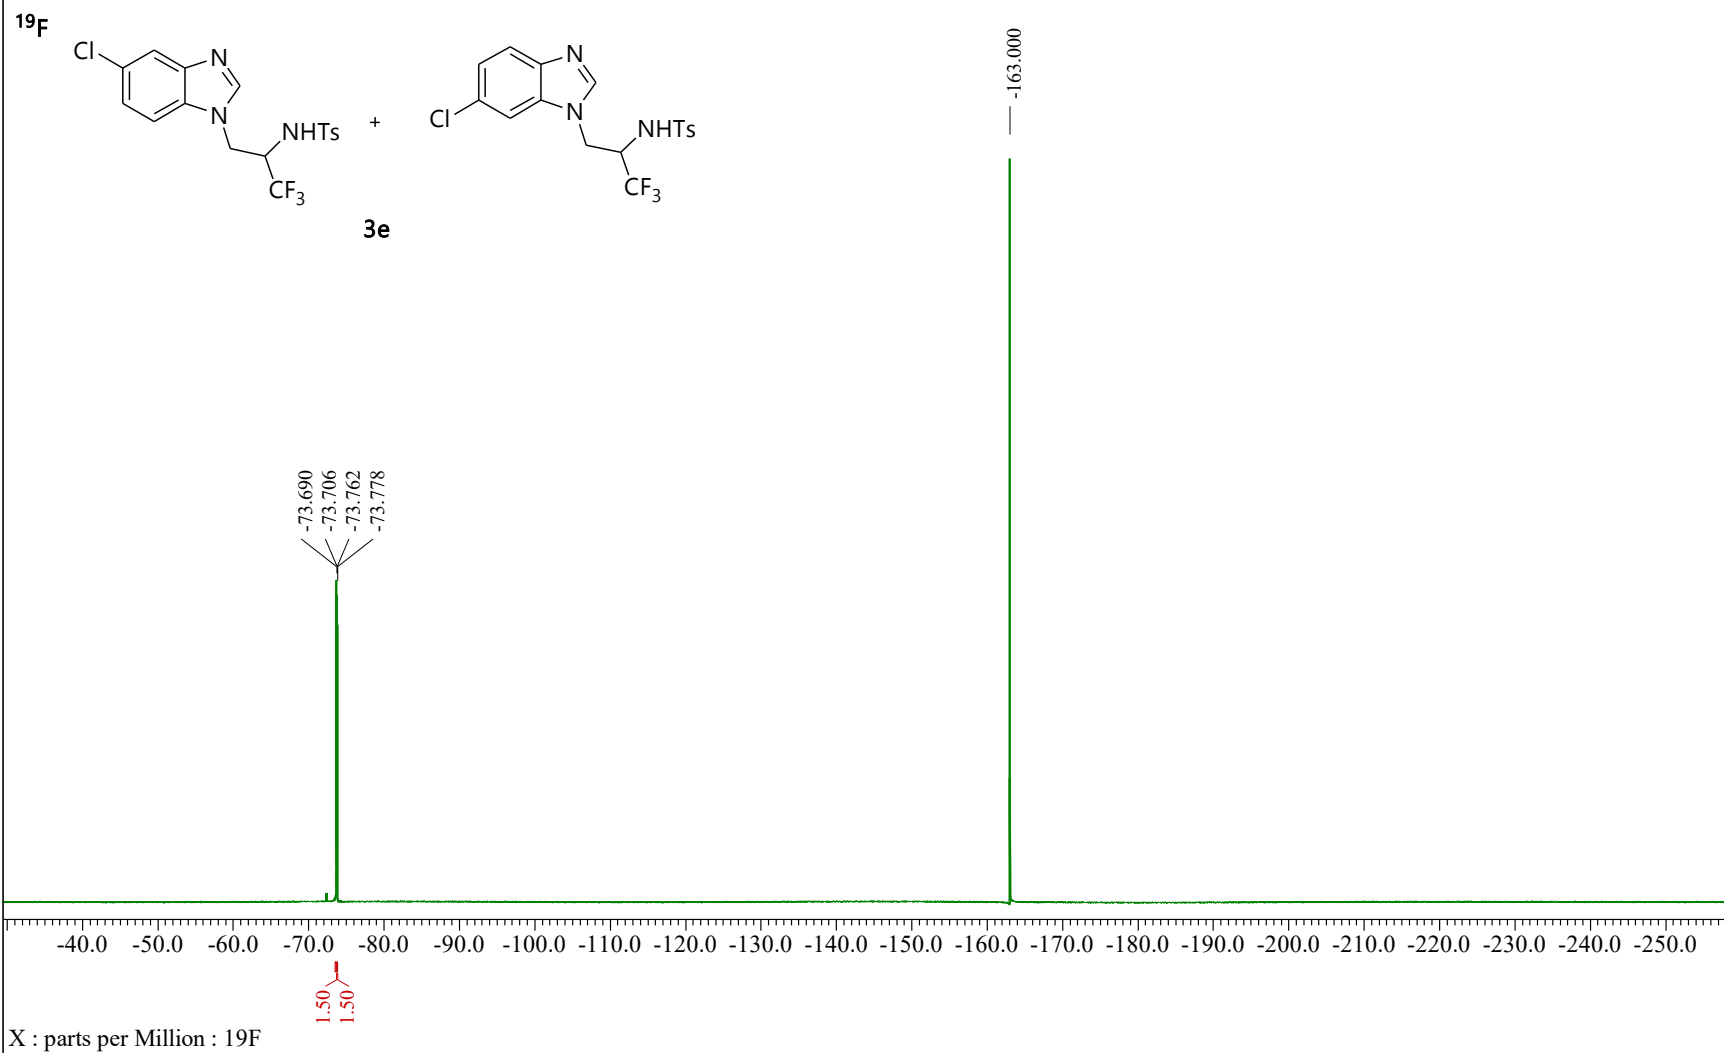

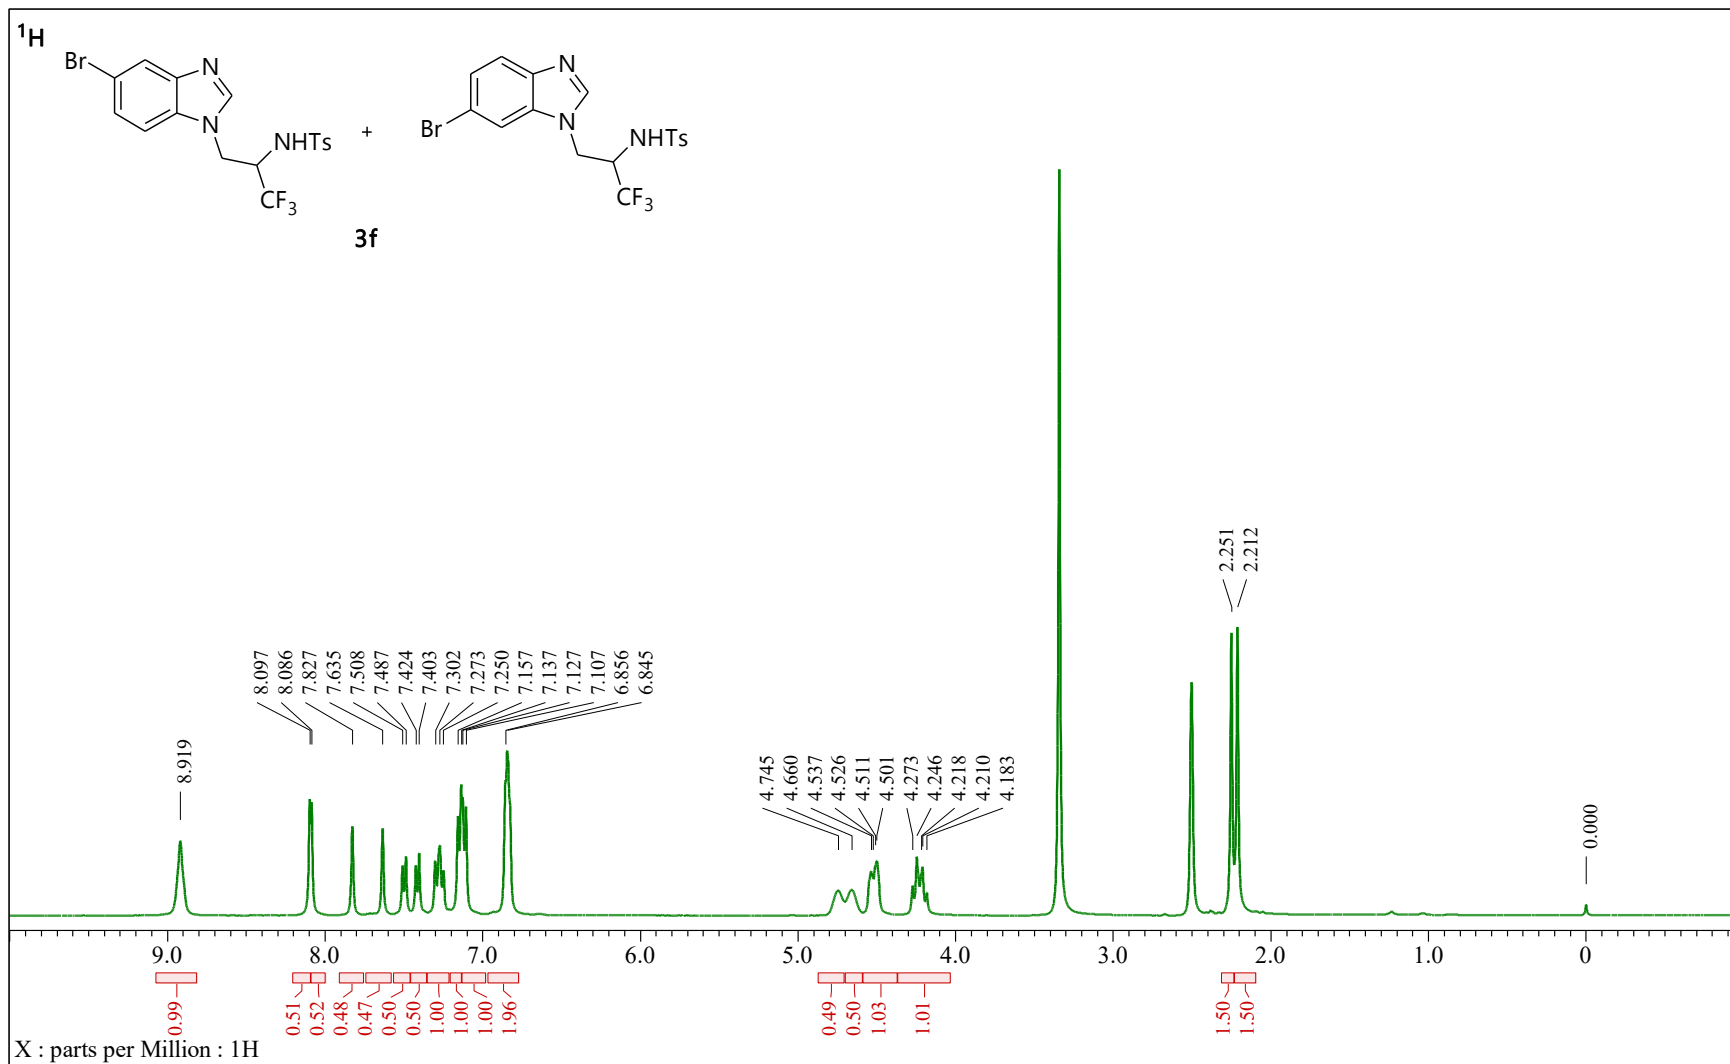

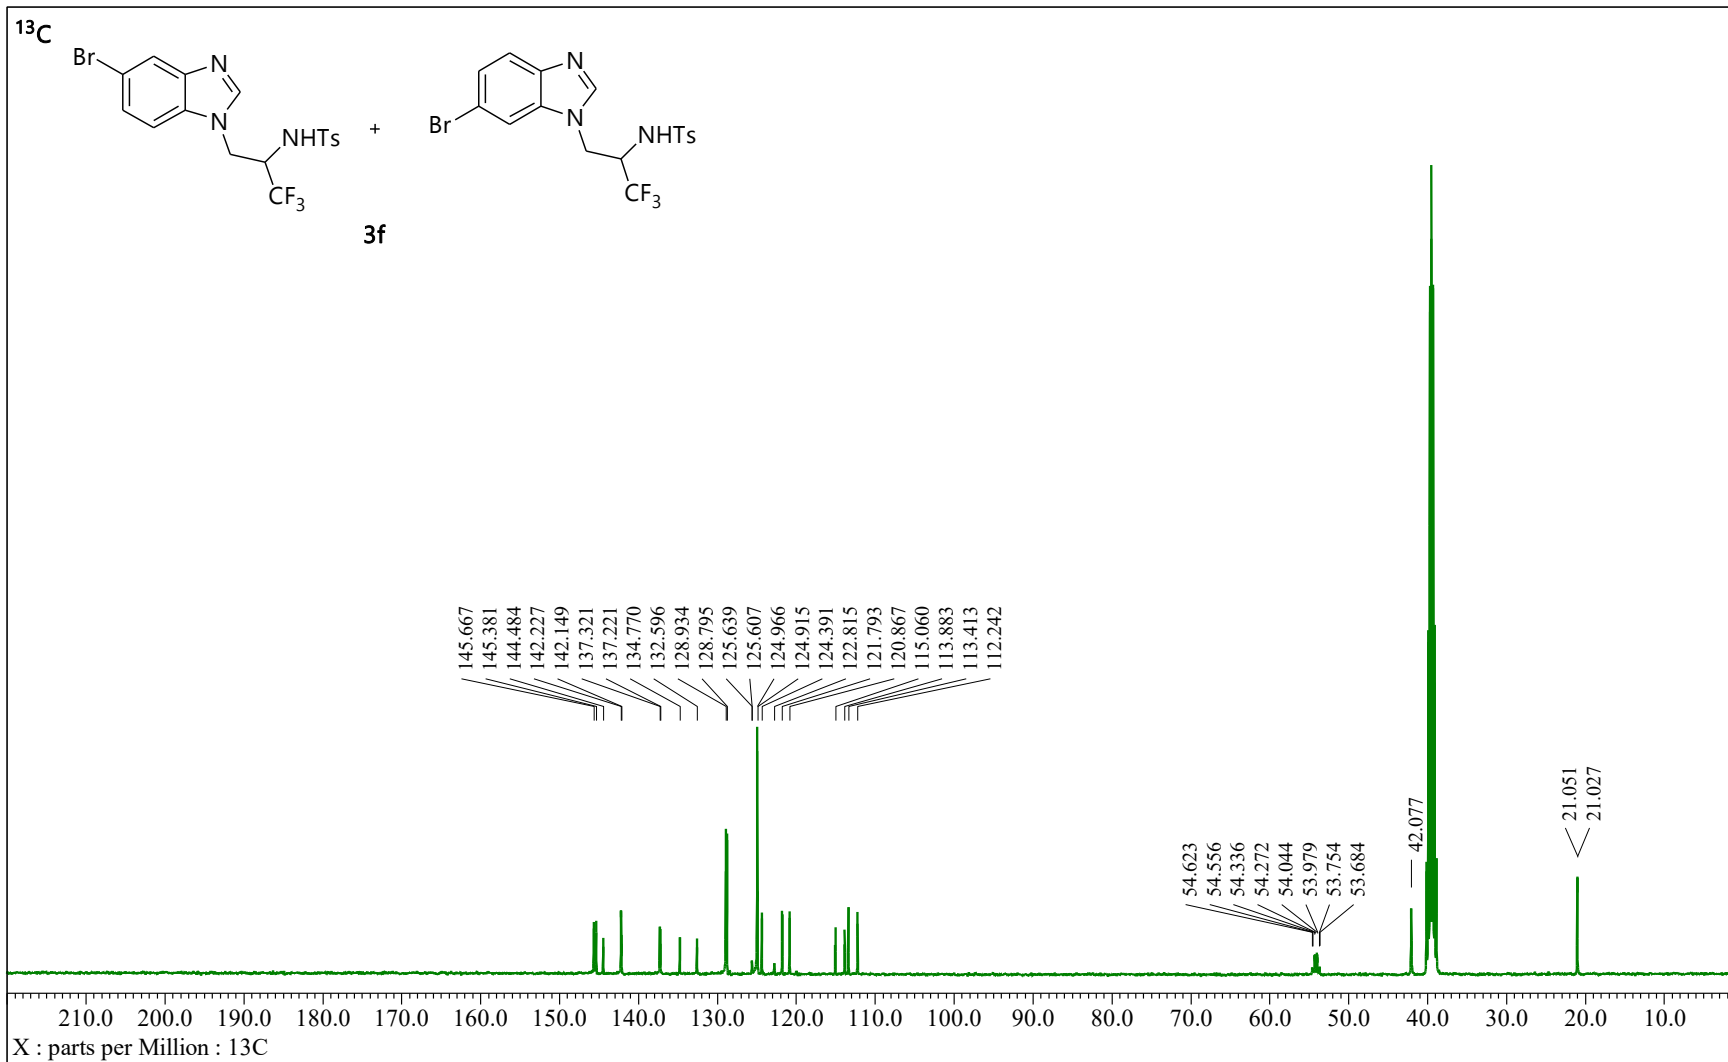

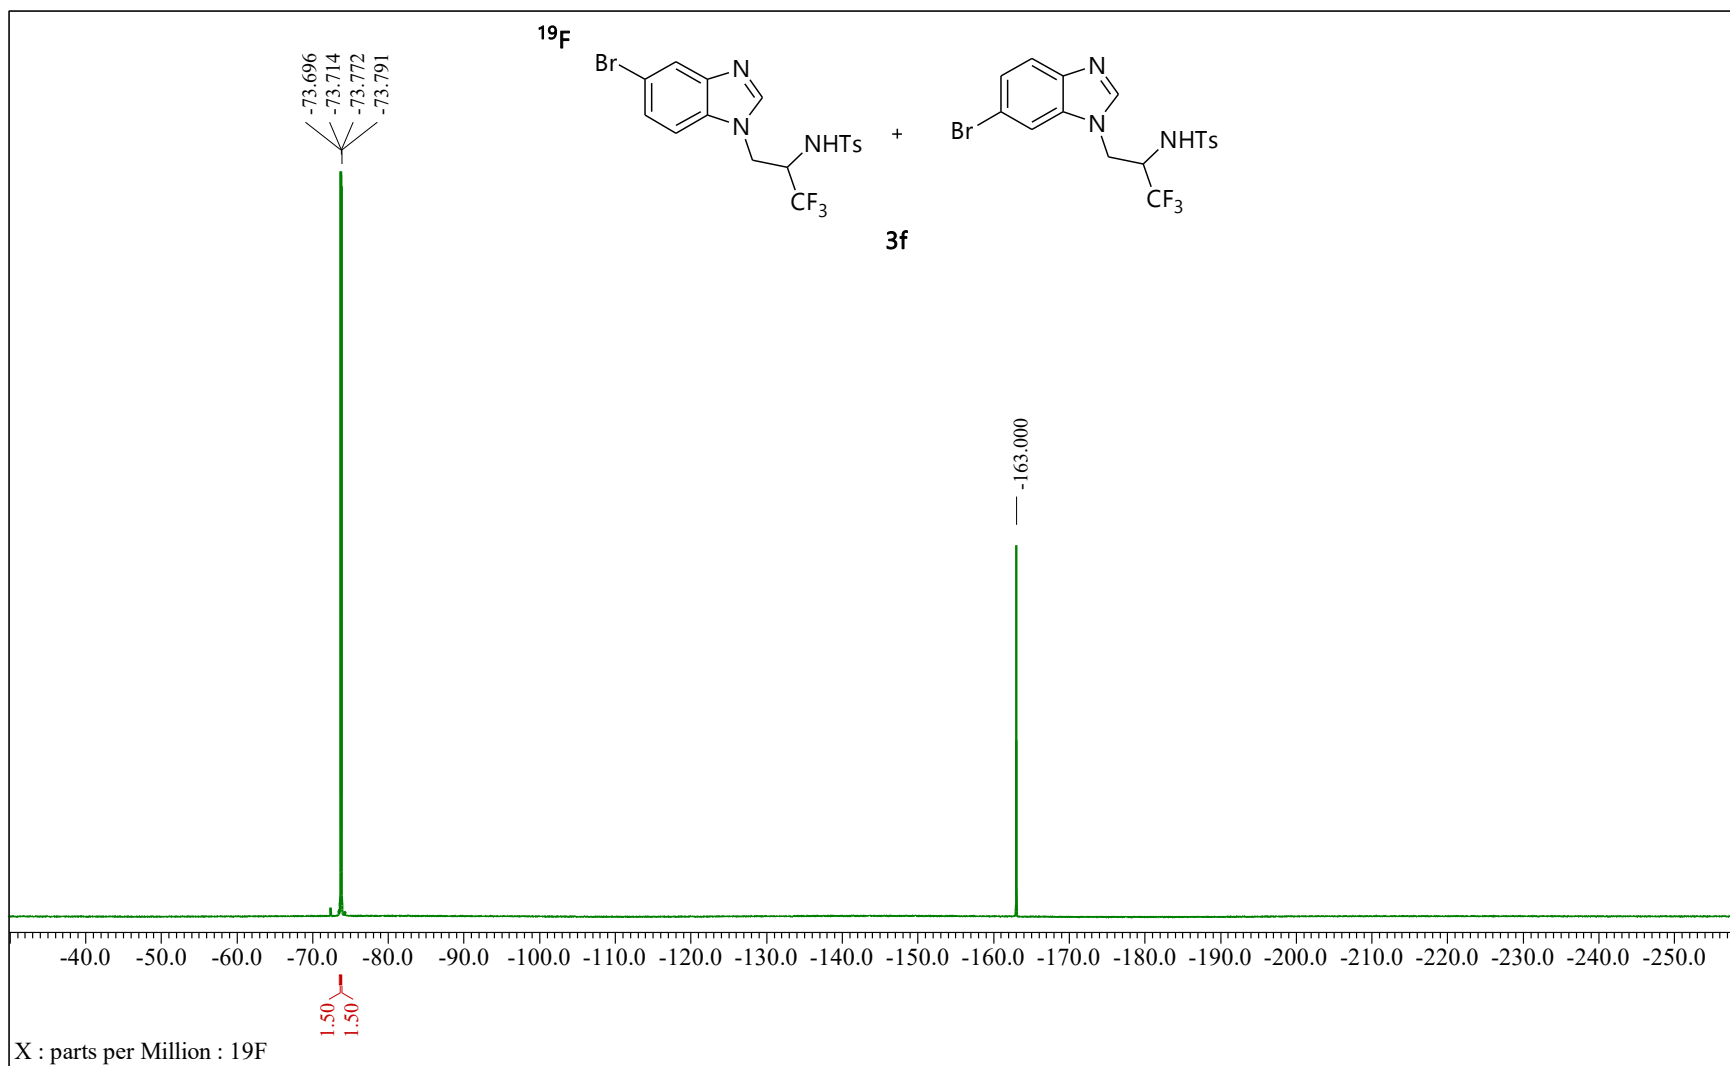

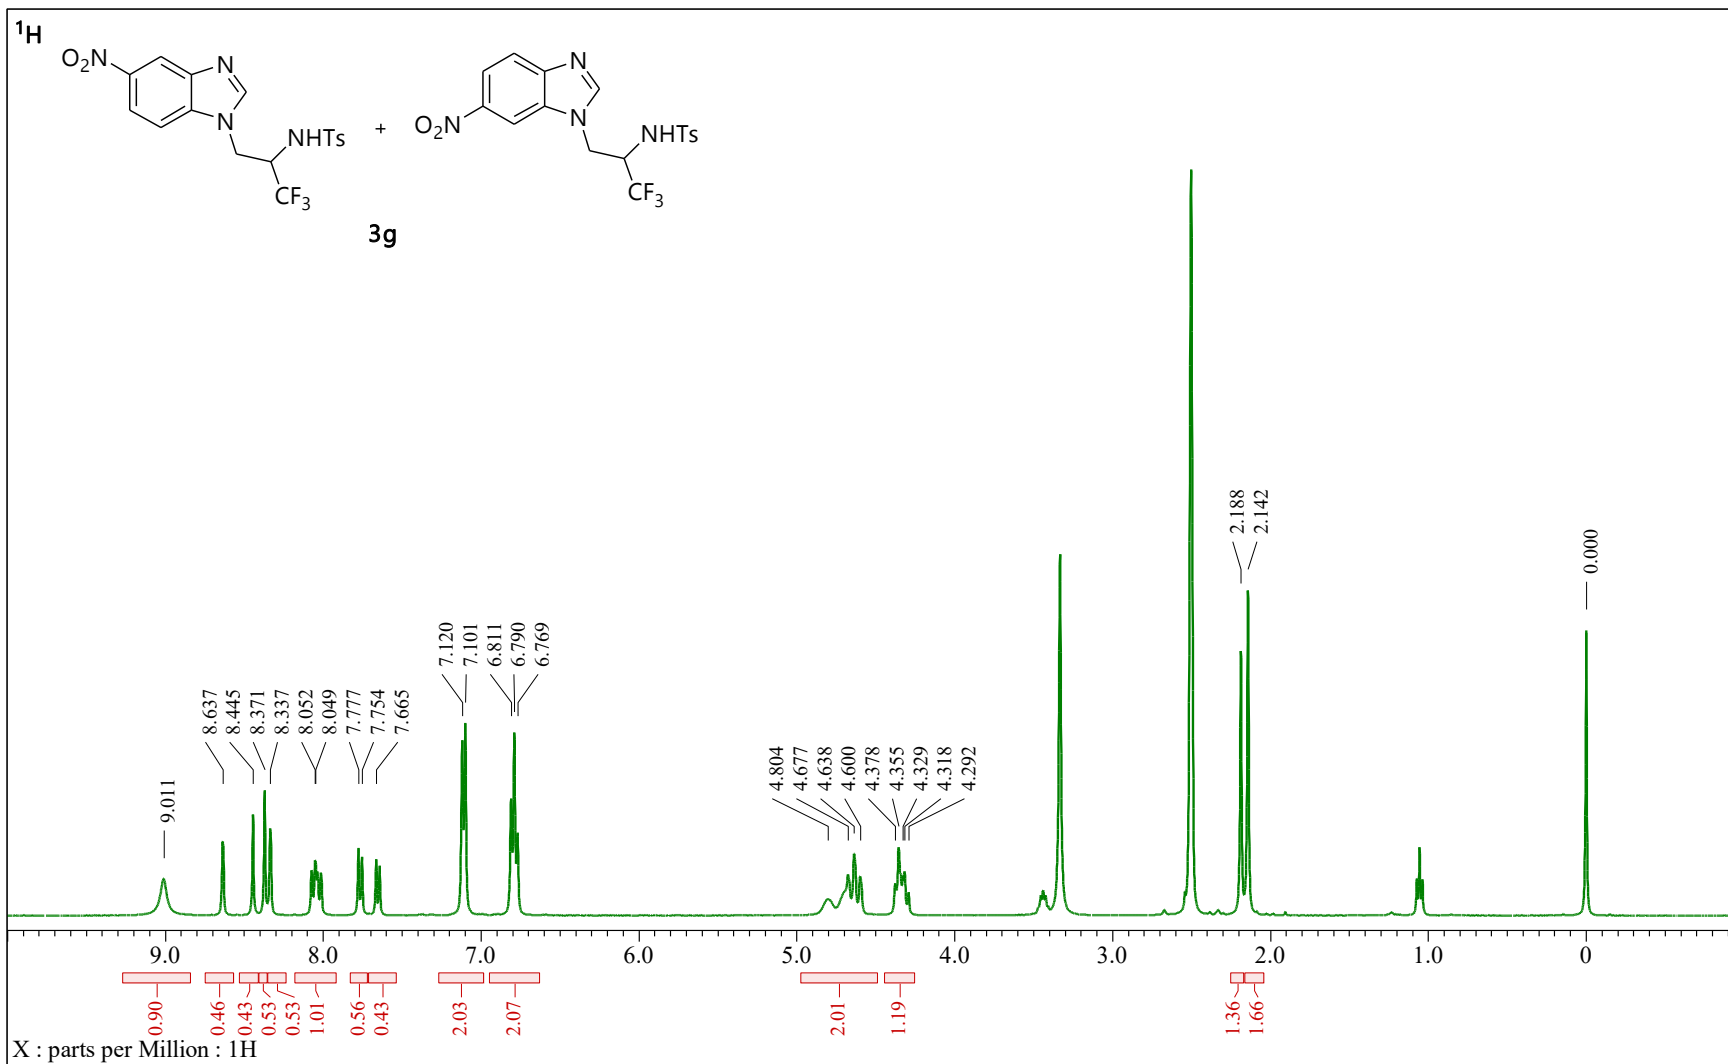



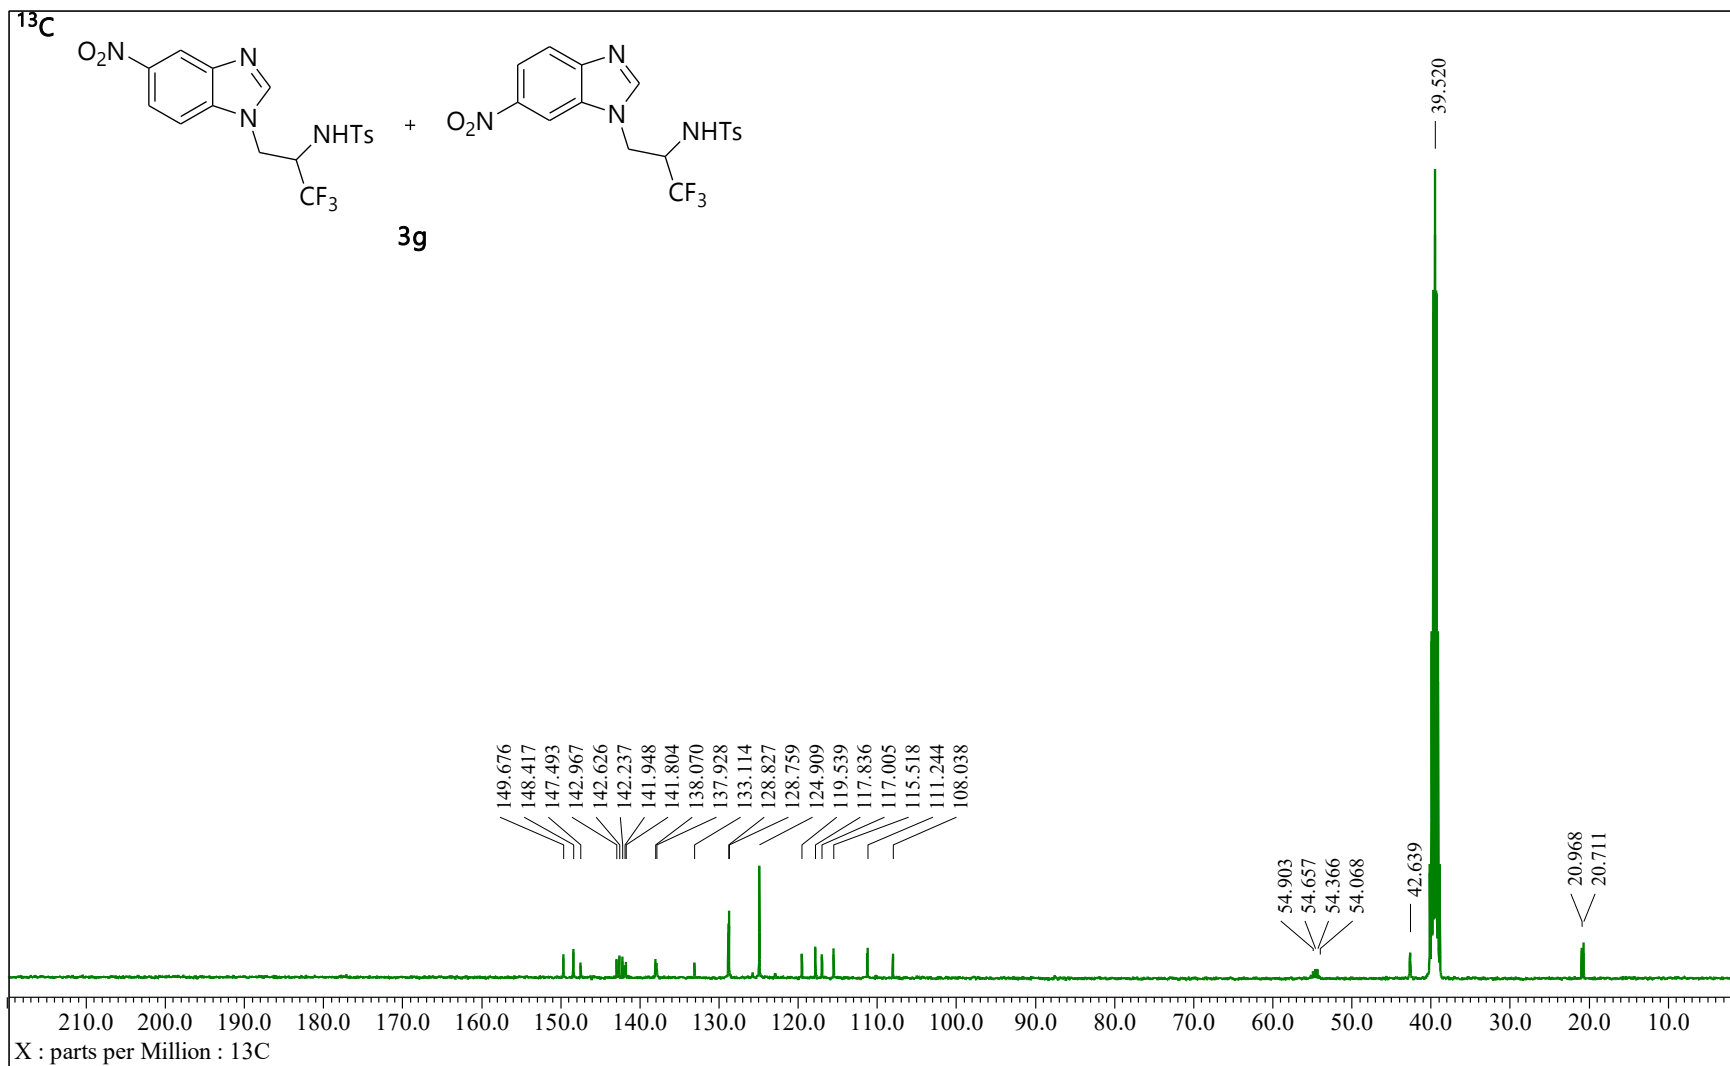

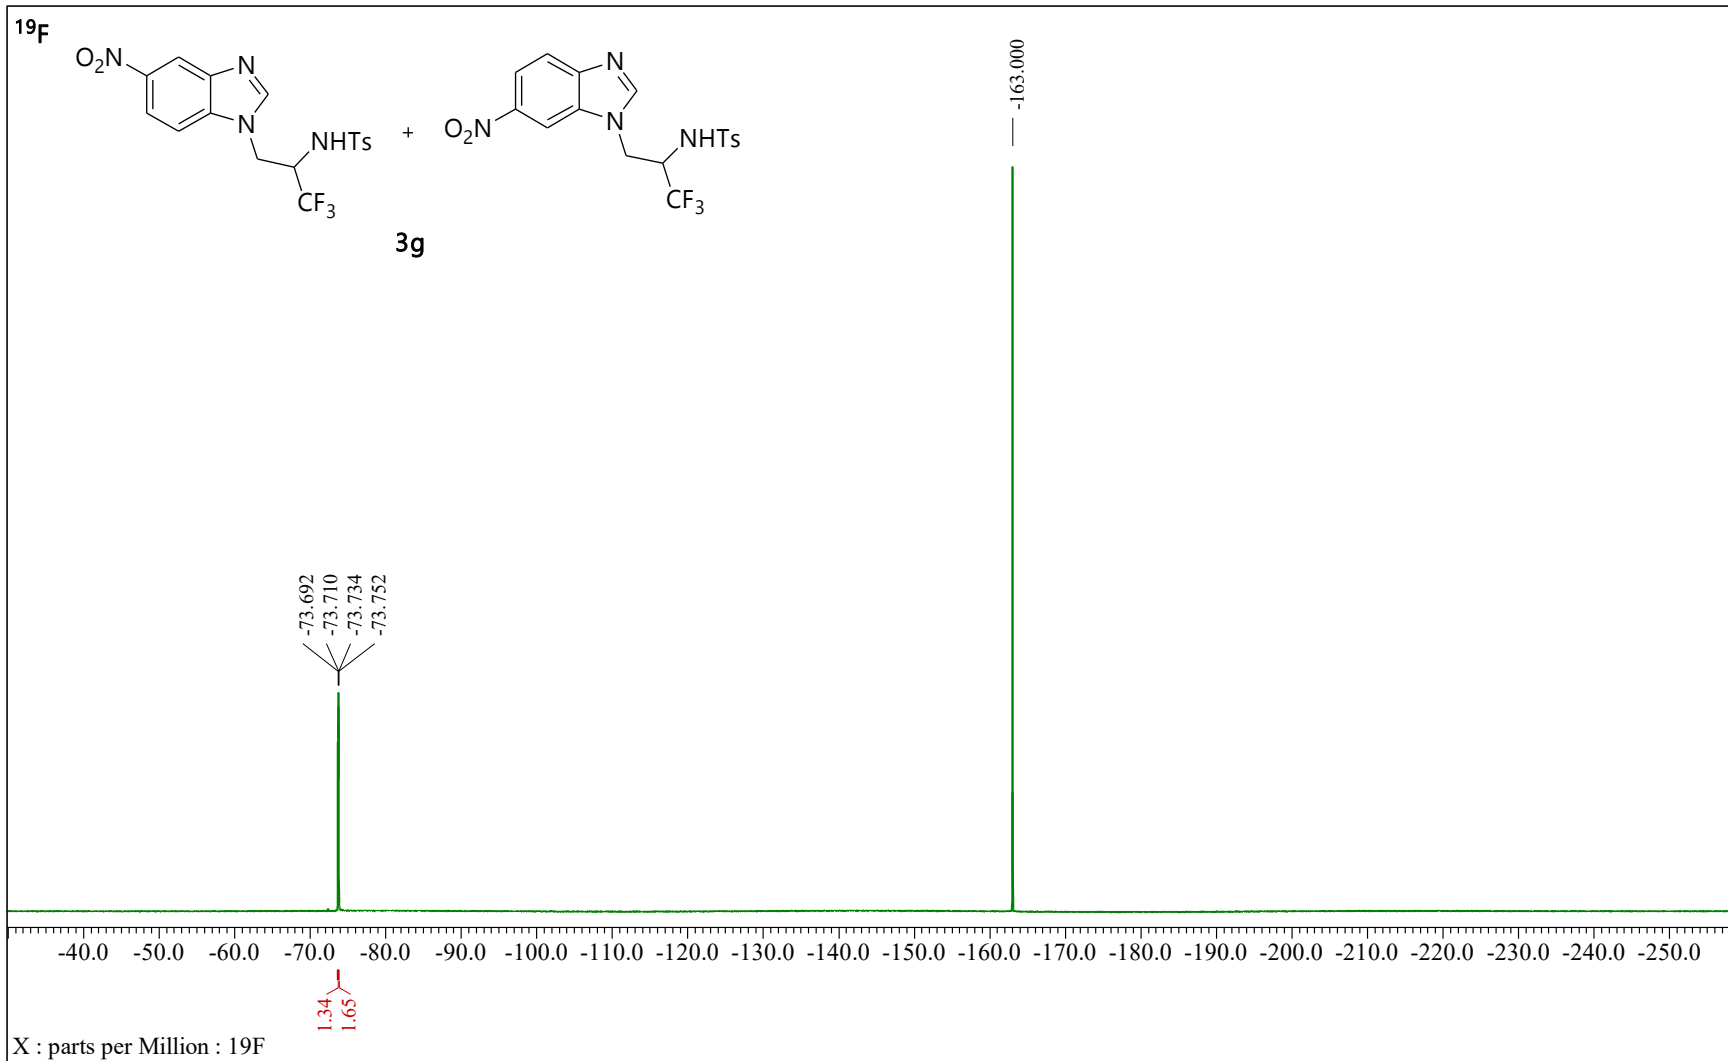

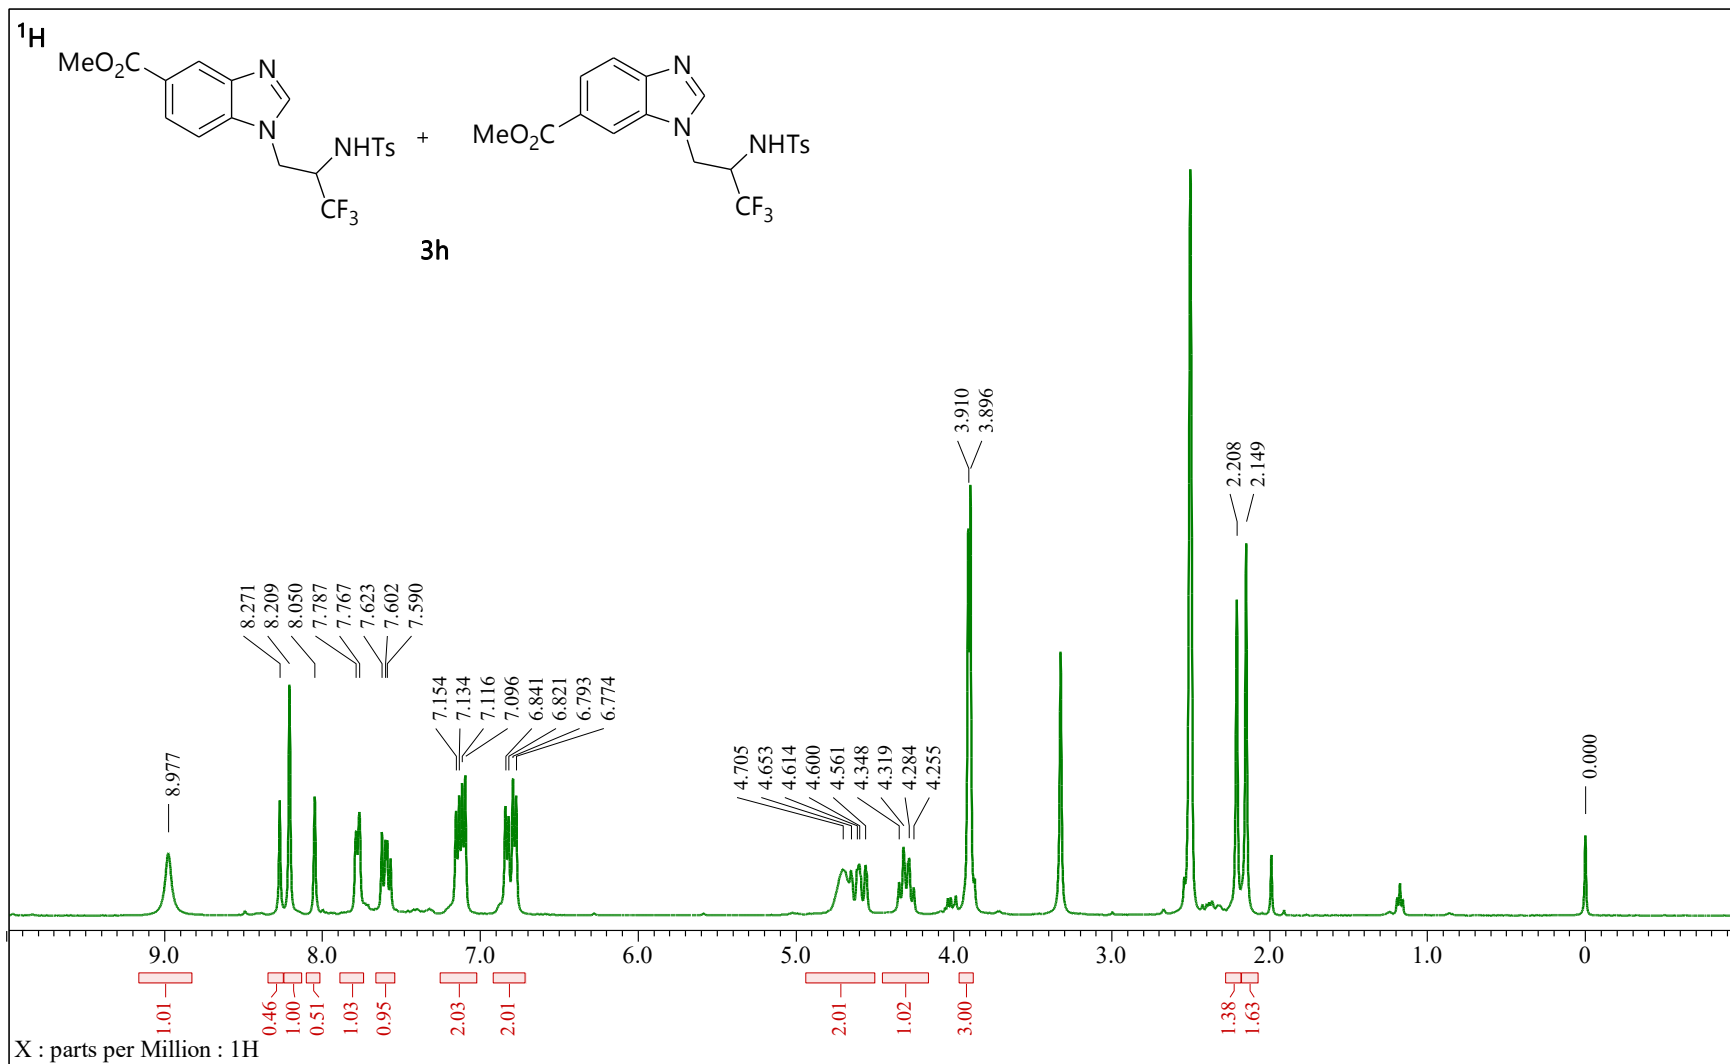

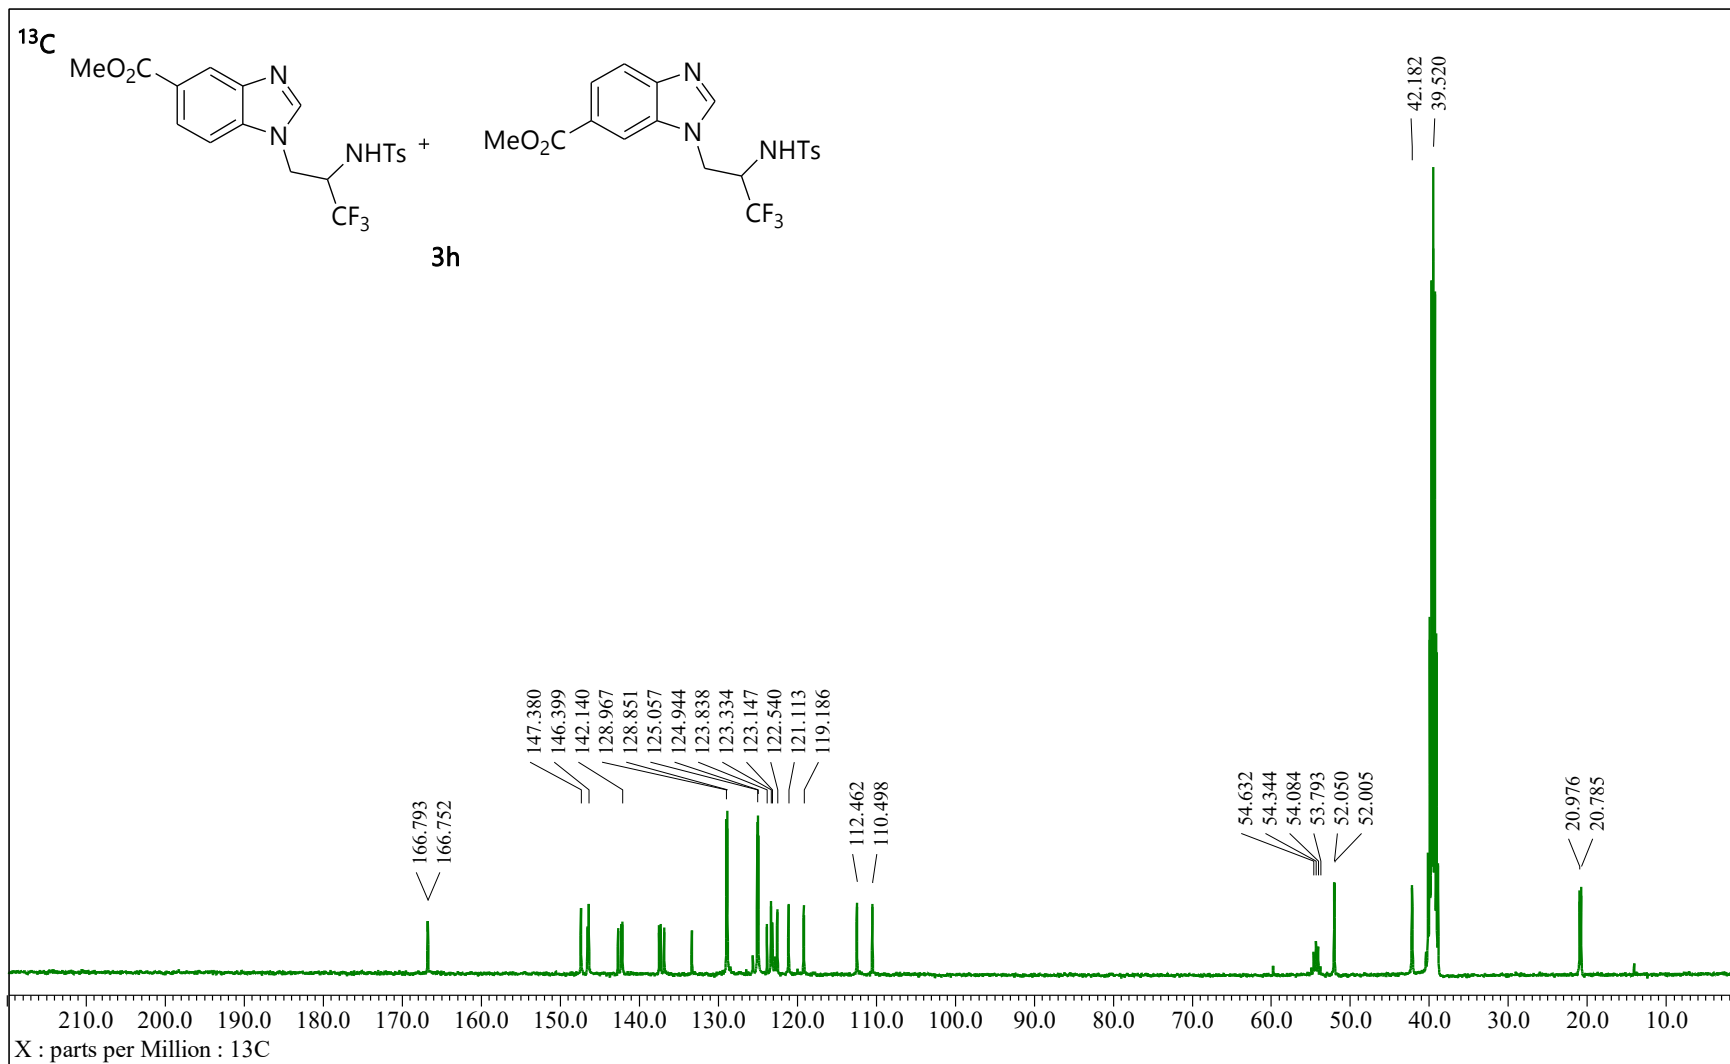

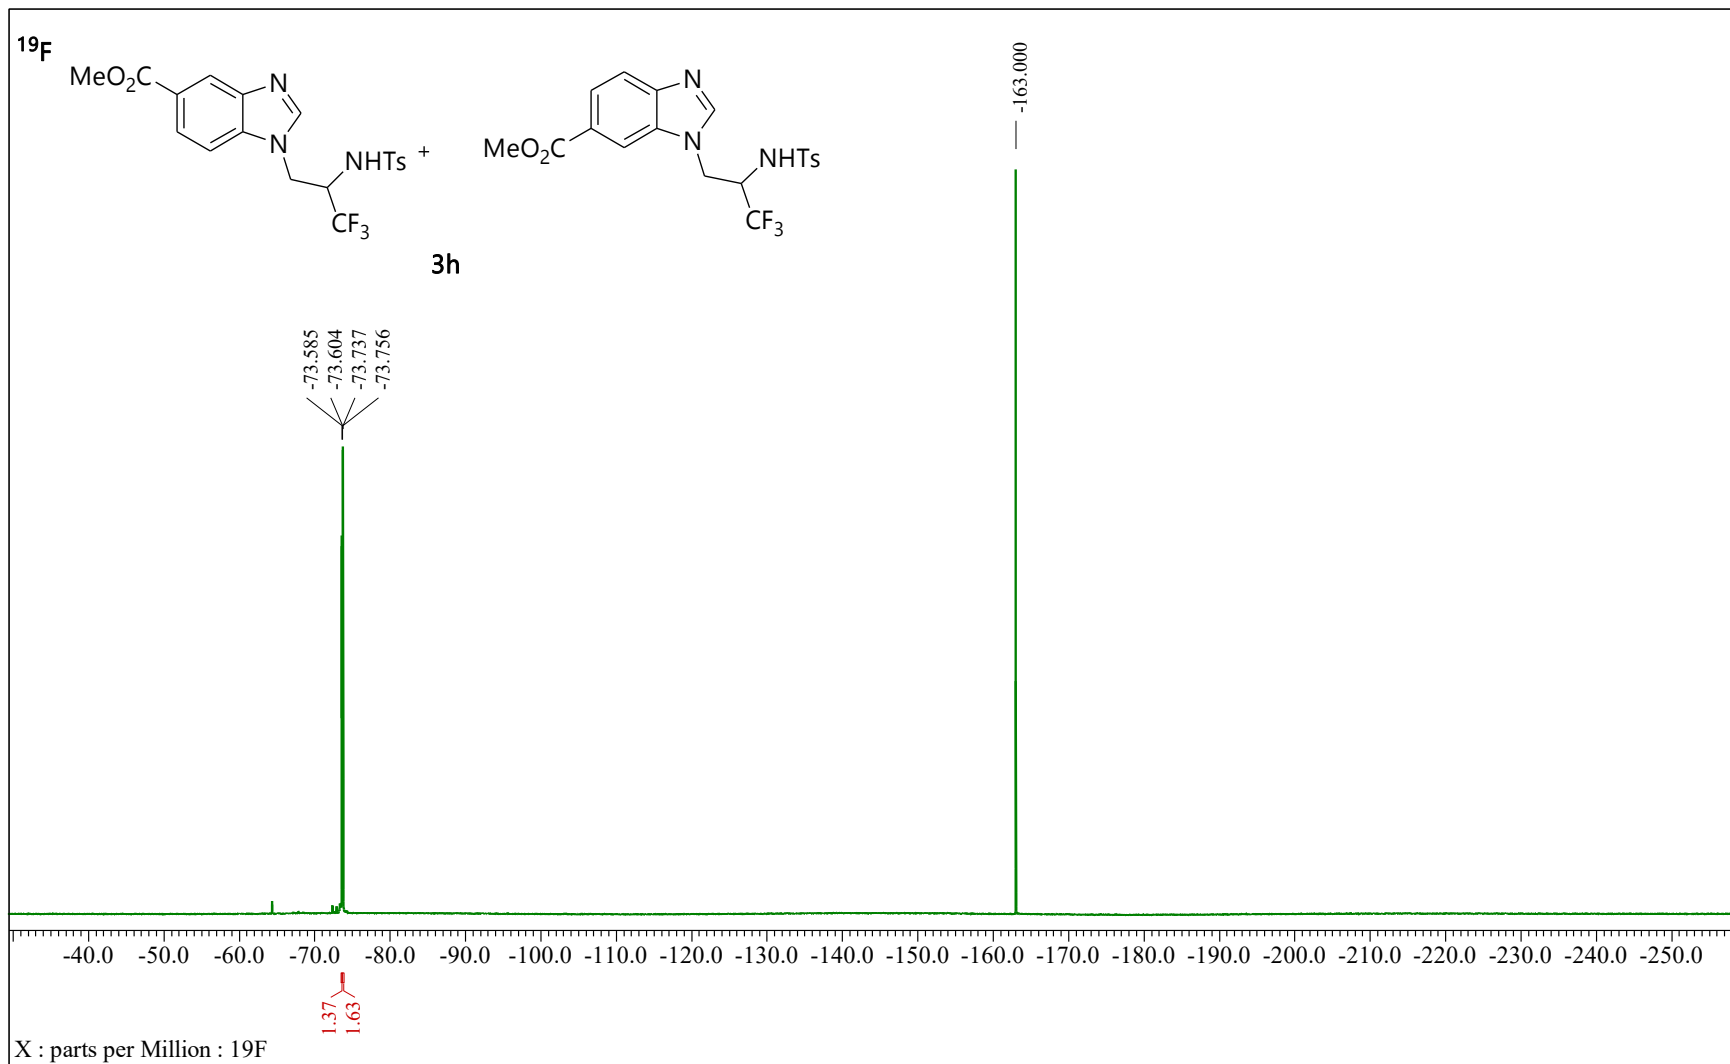

<sup>1</sup>H

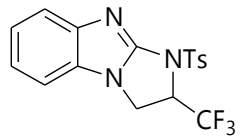

4a

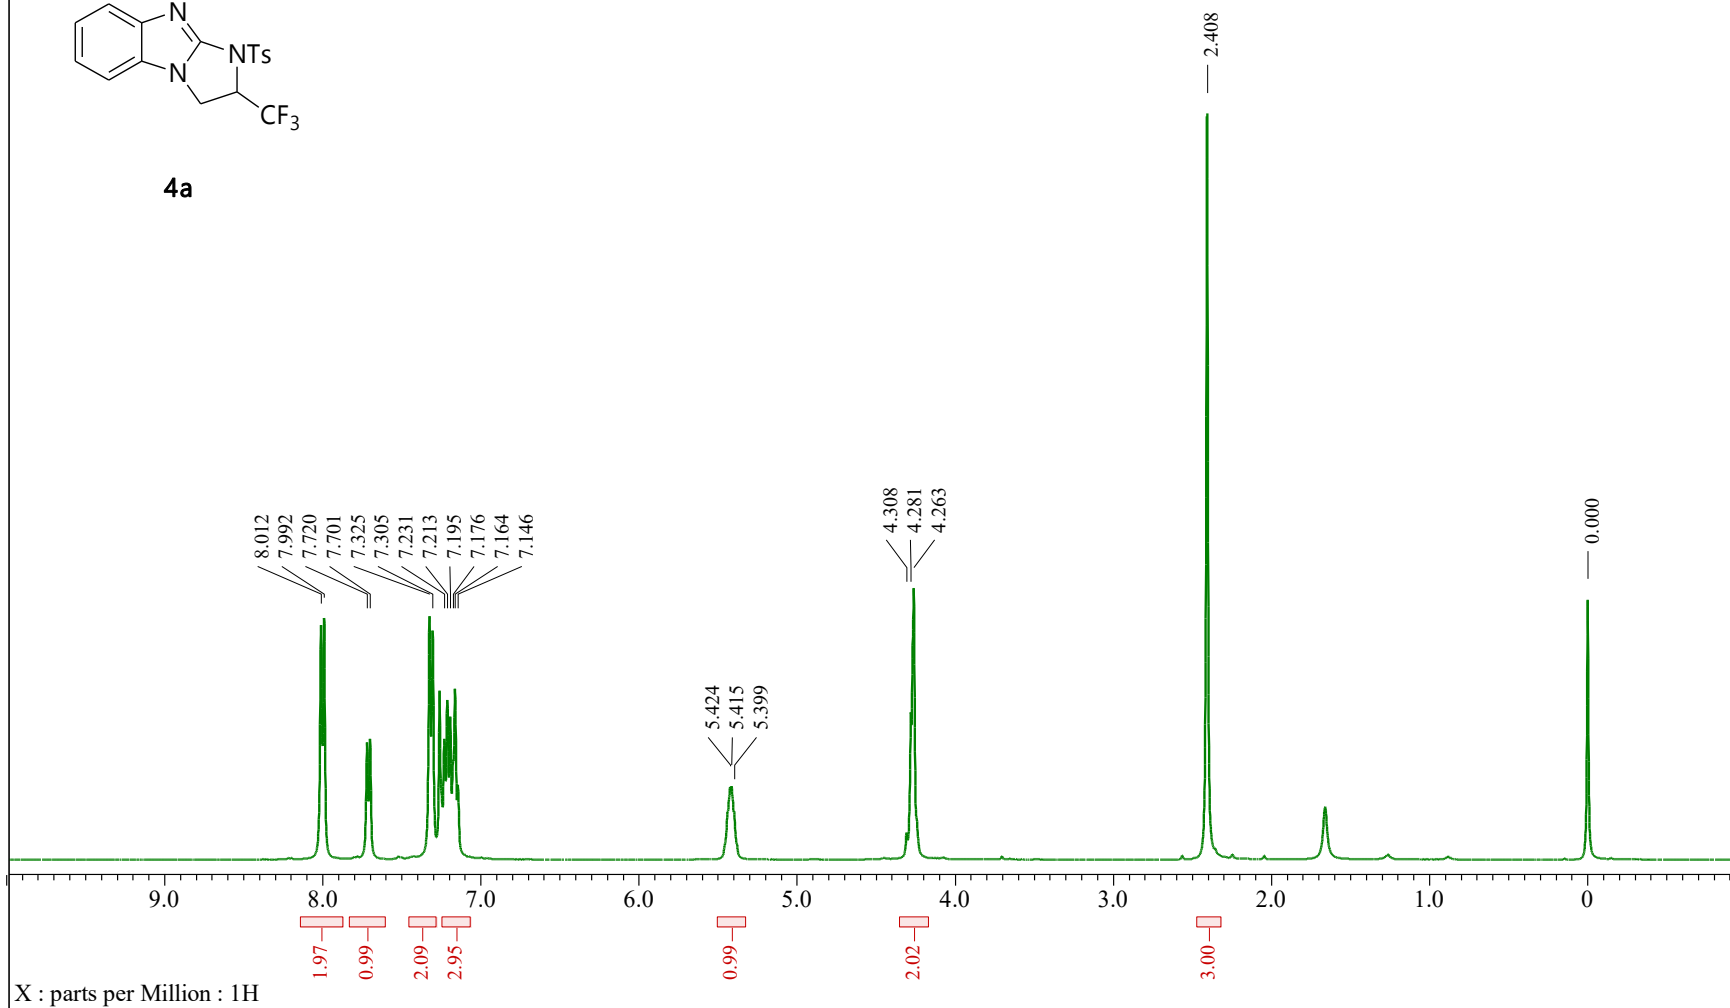

<sup>13</sup>C

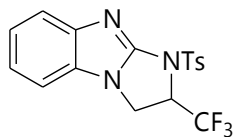

4a

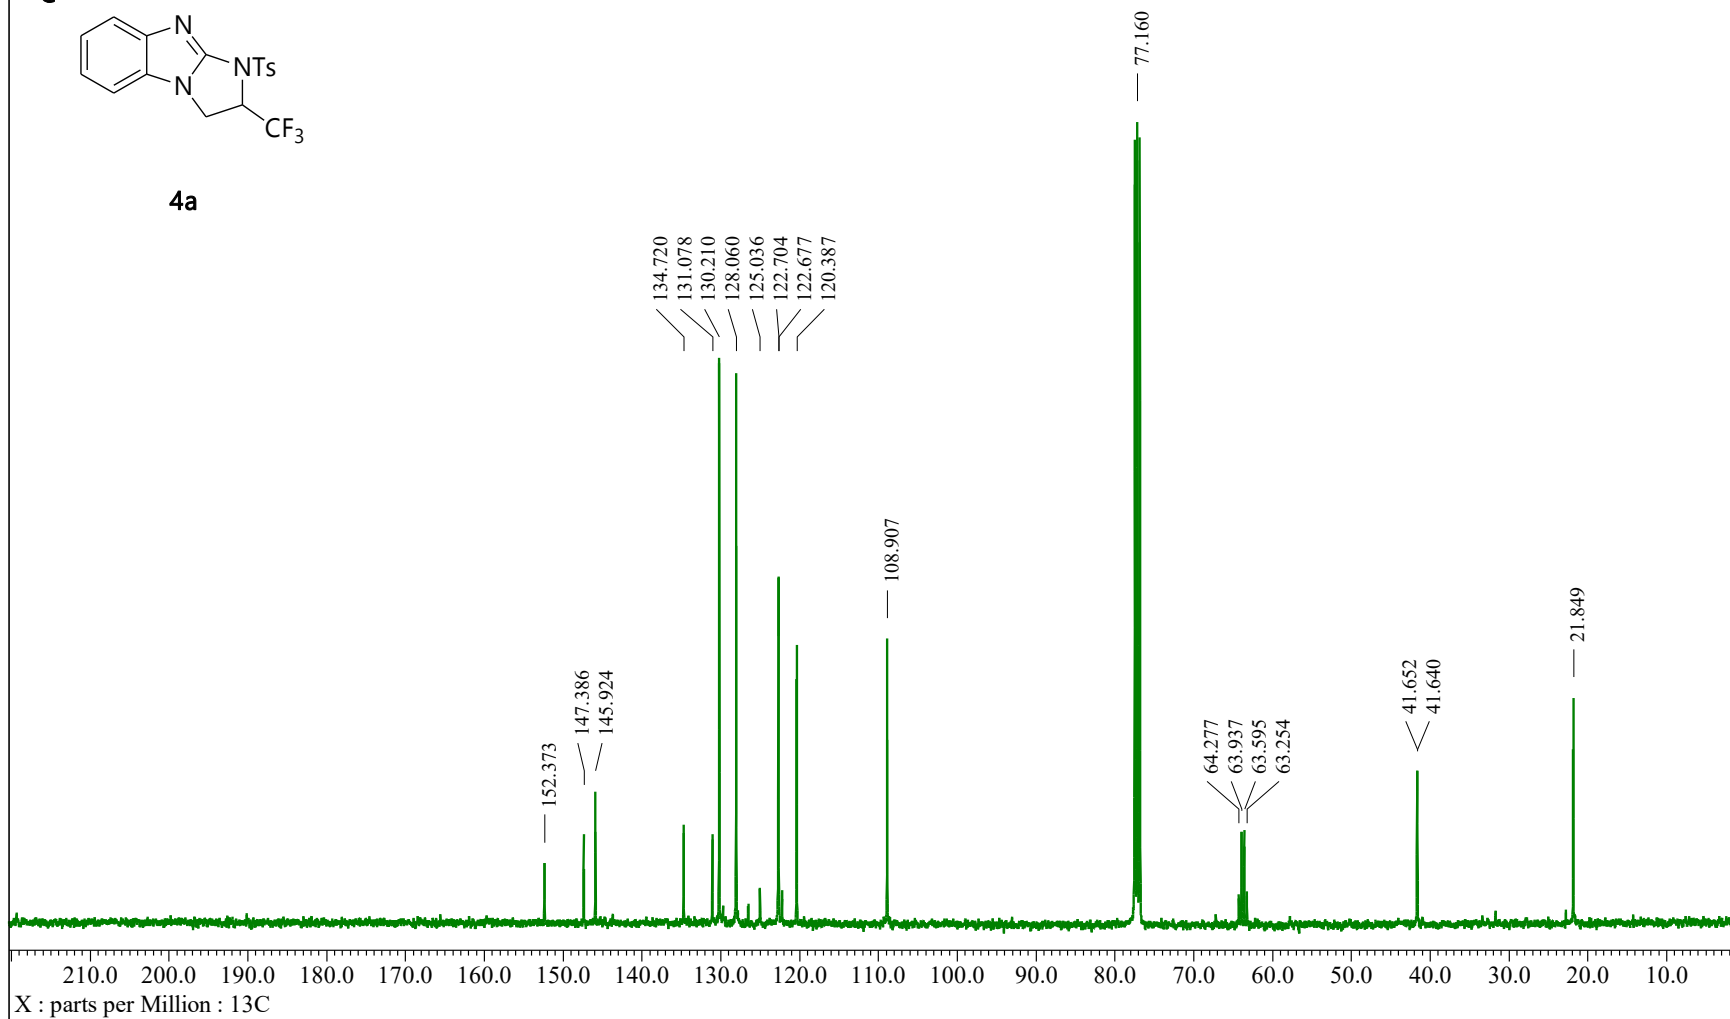

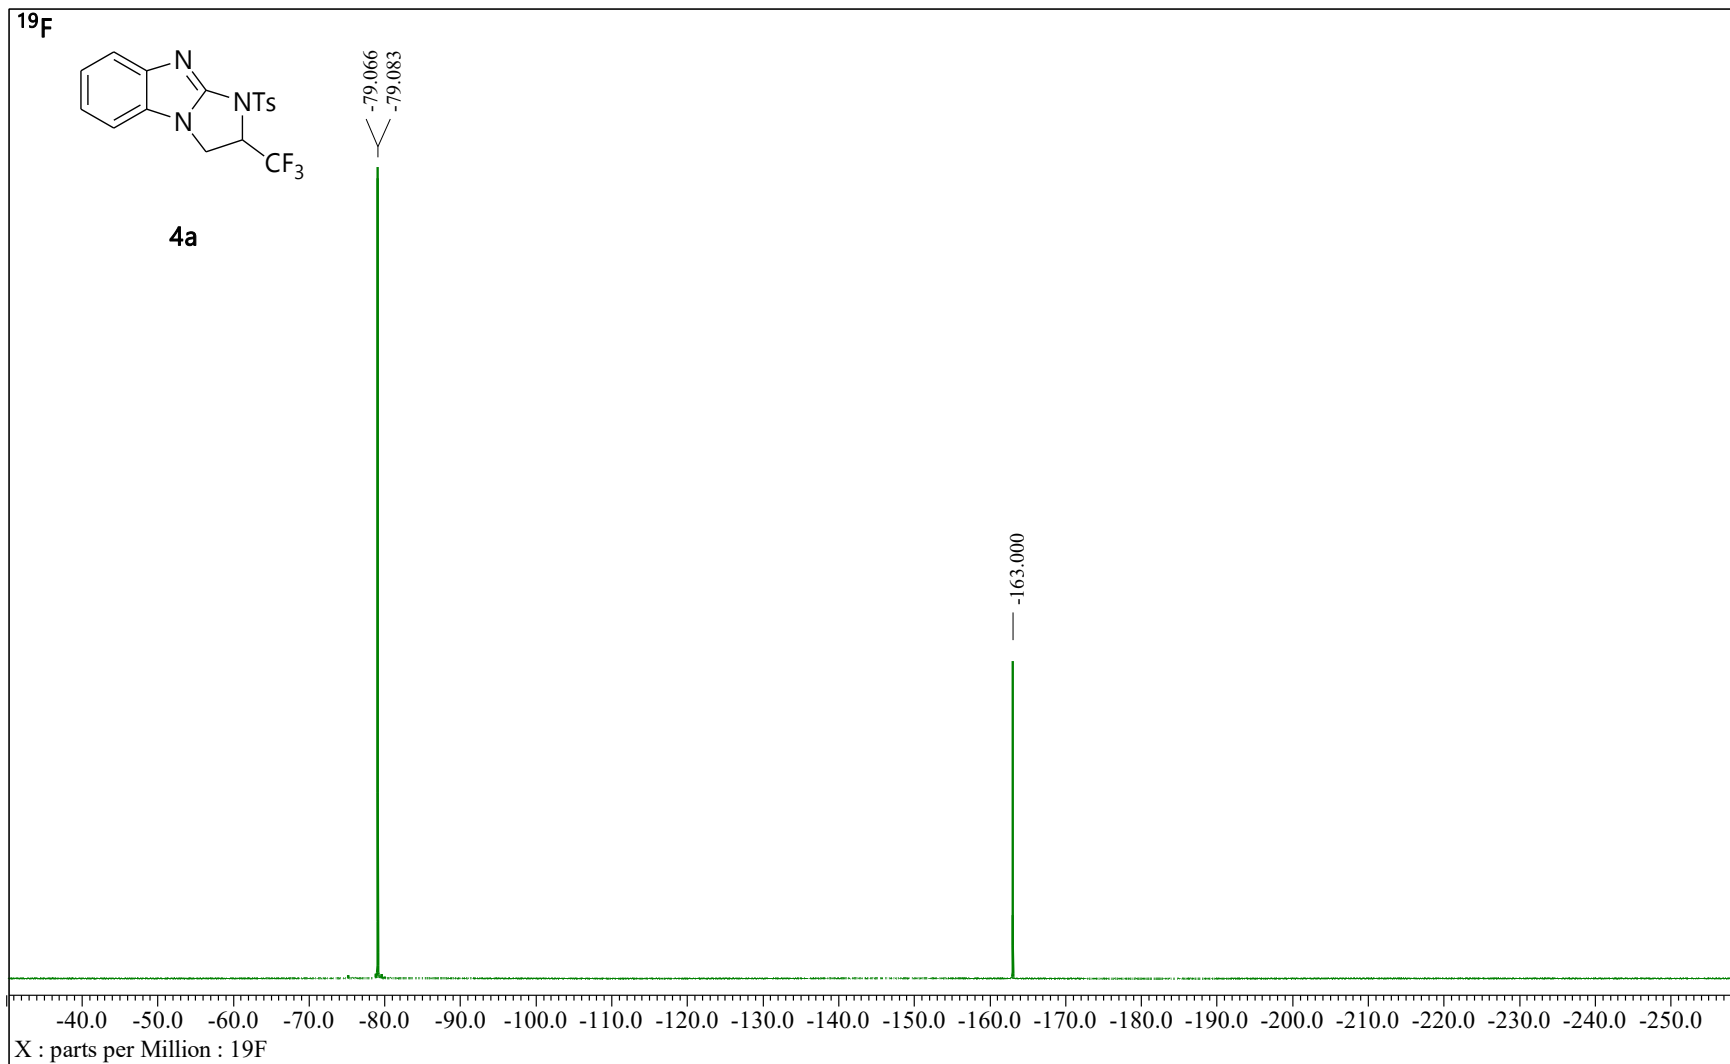



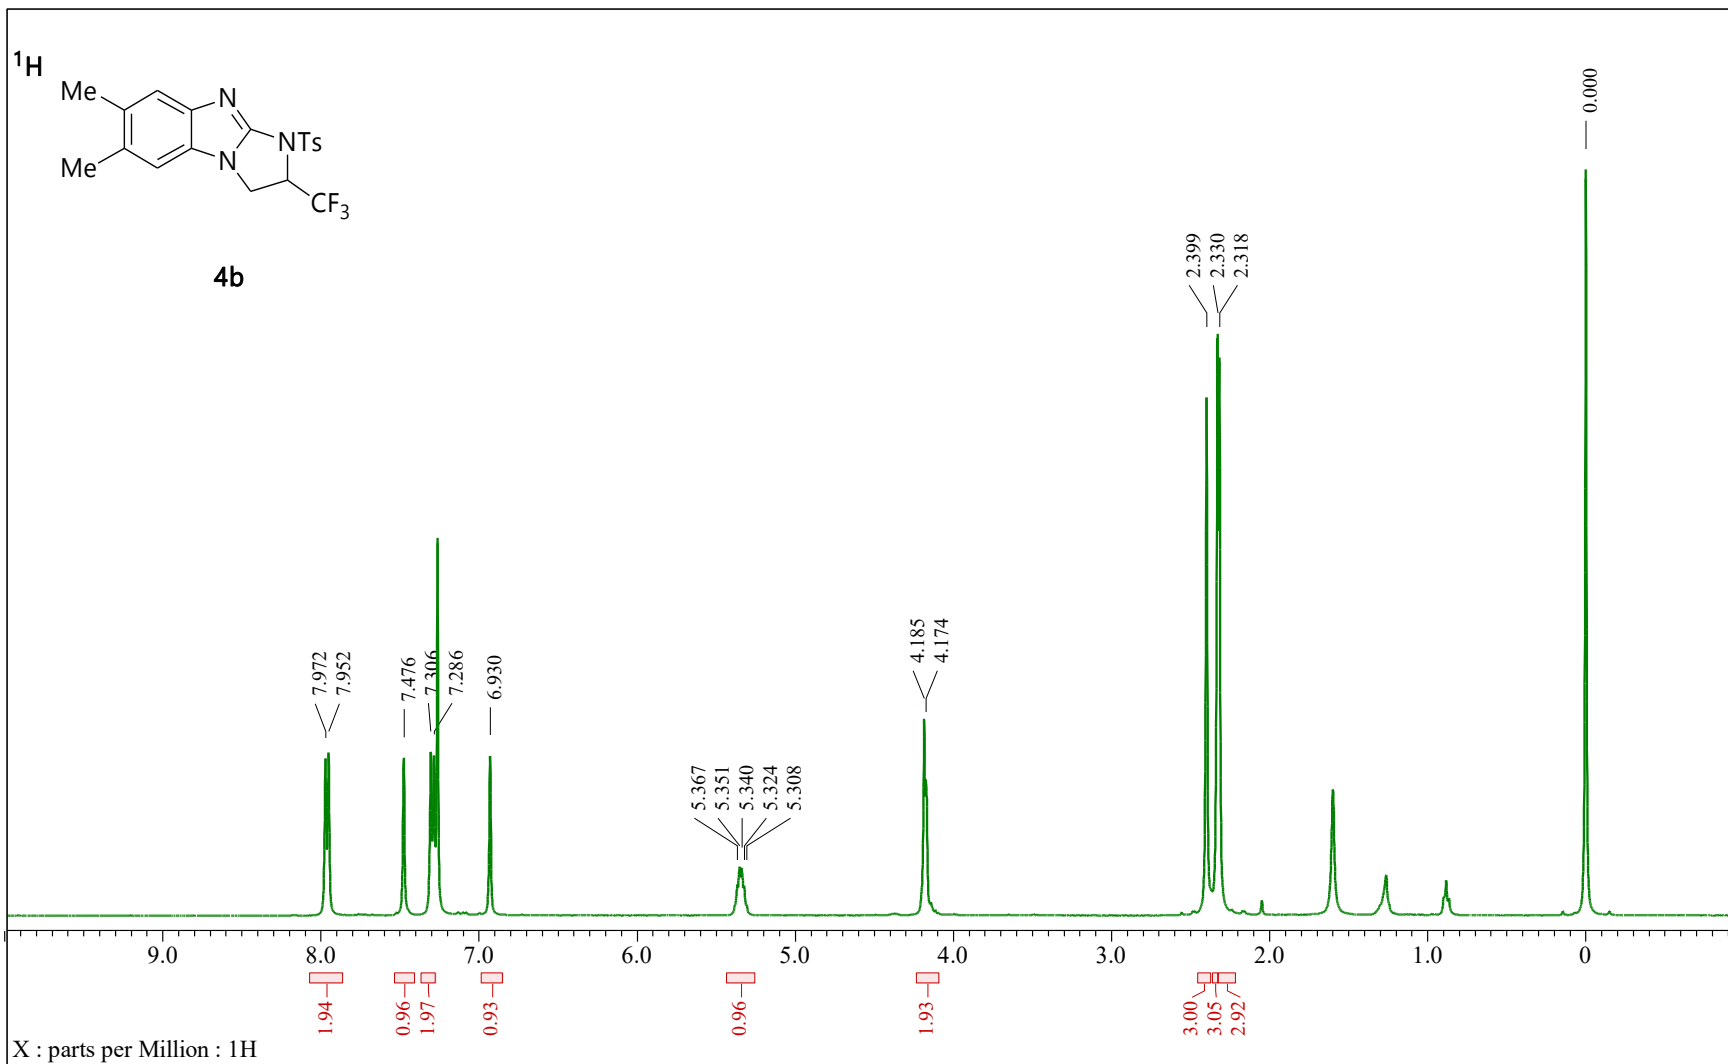

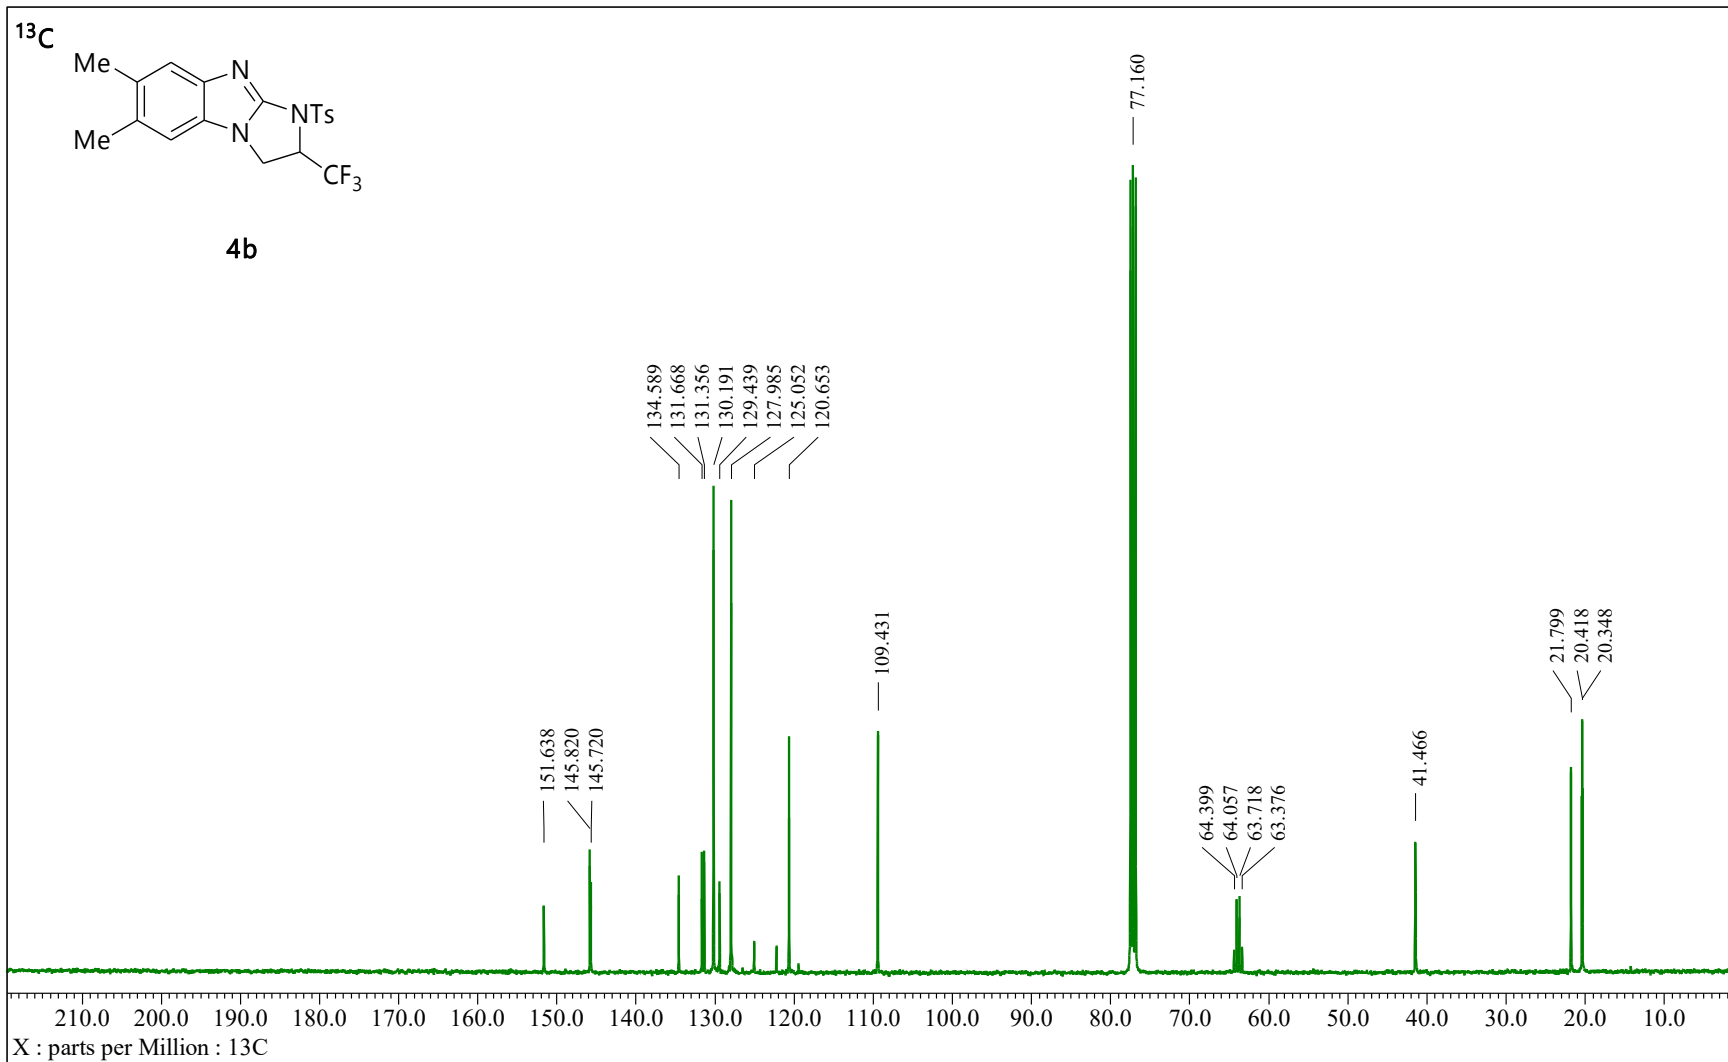

<sup>19</sup>F

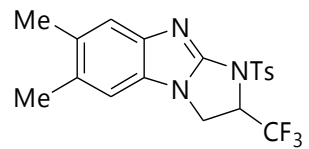

4b

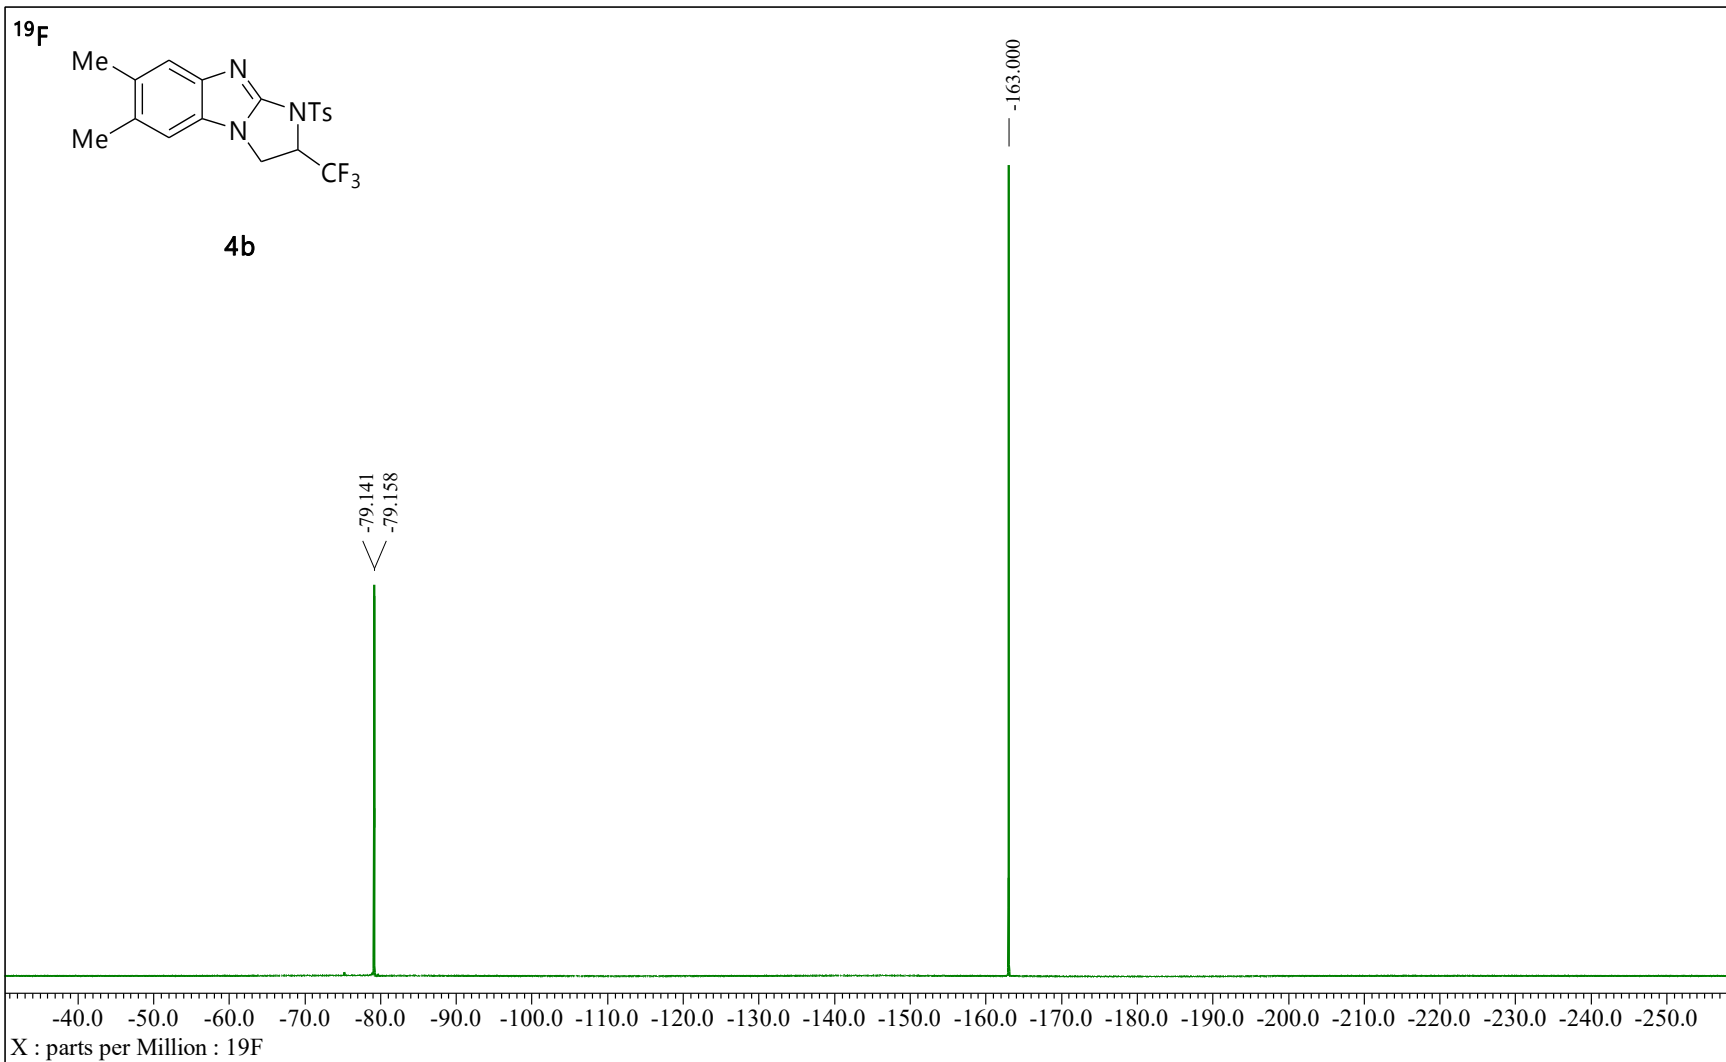

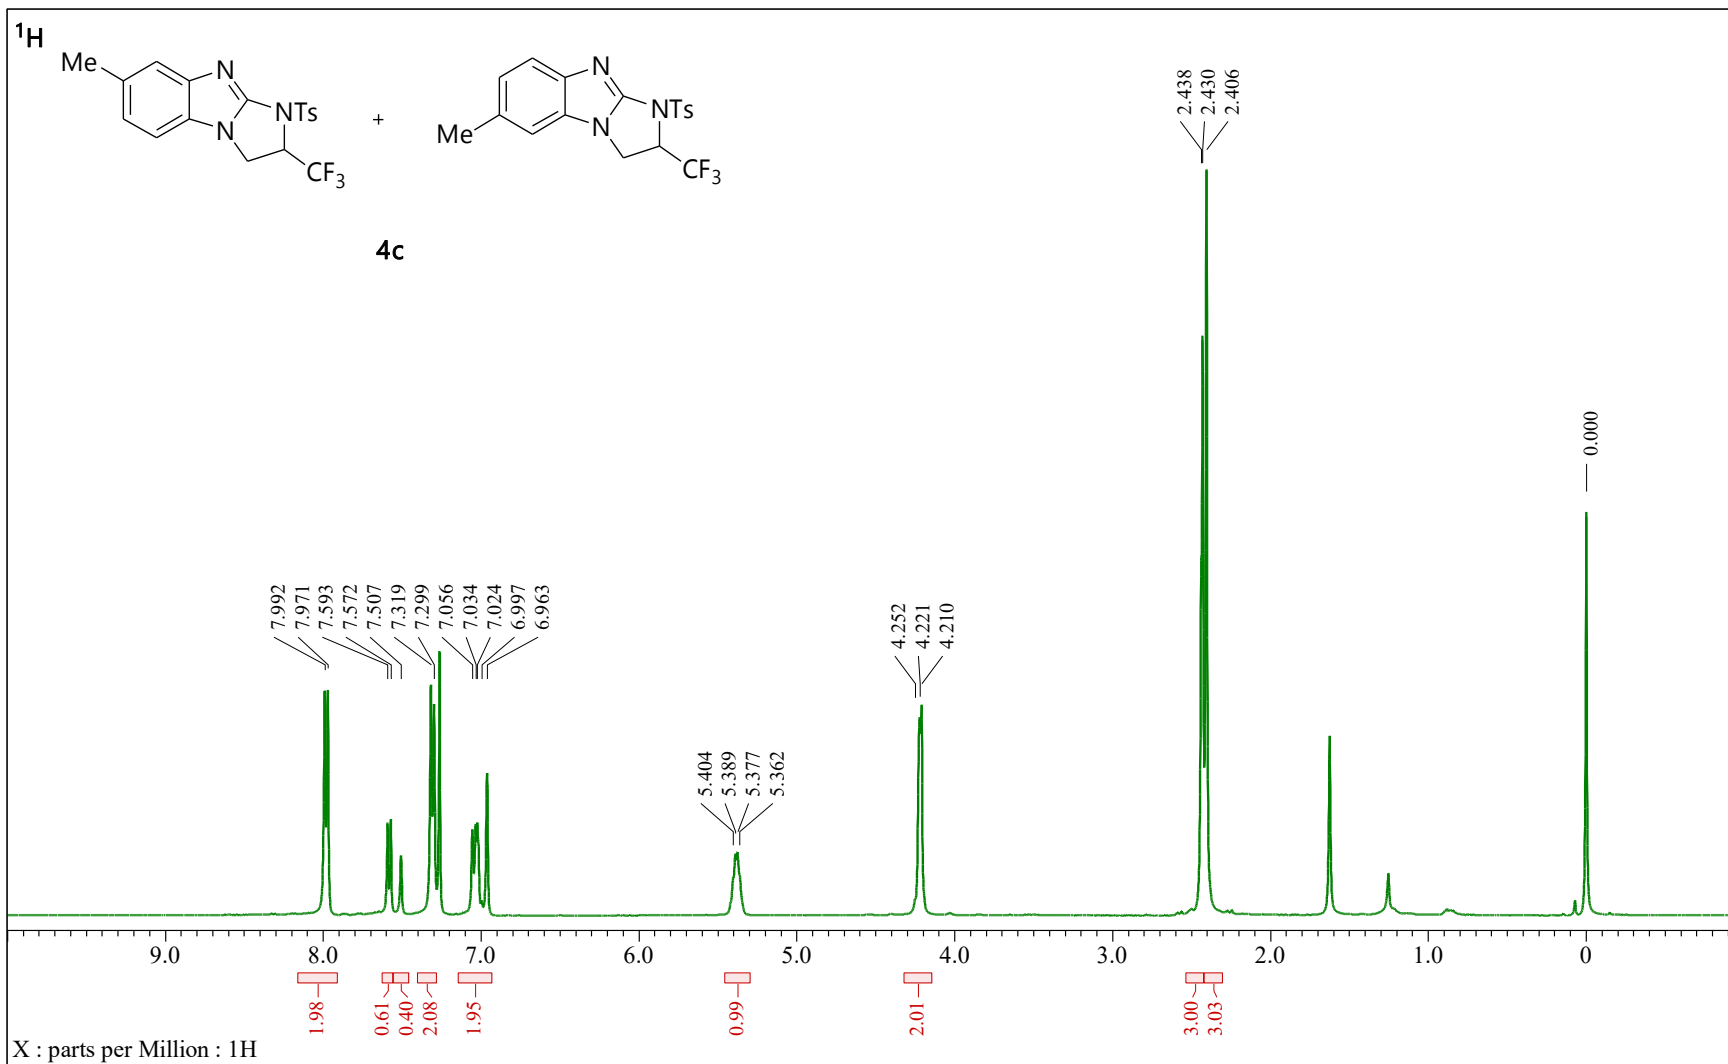

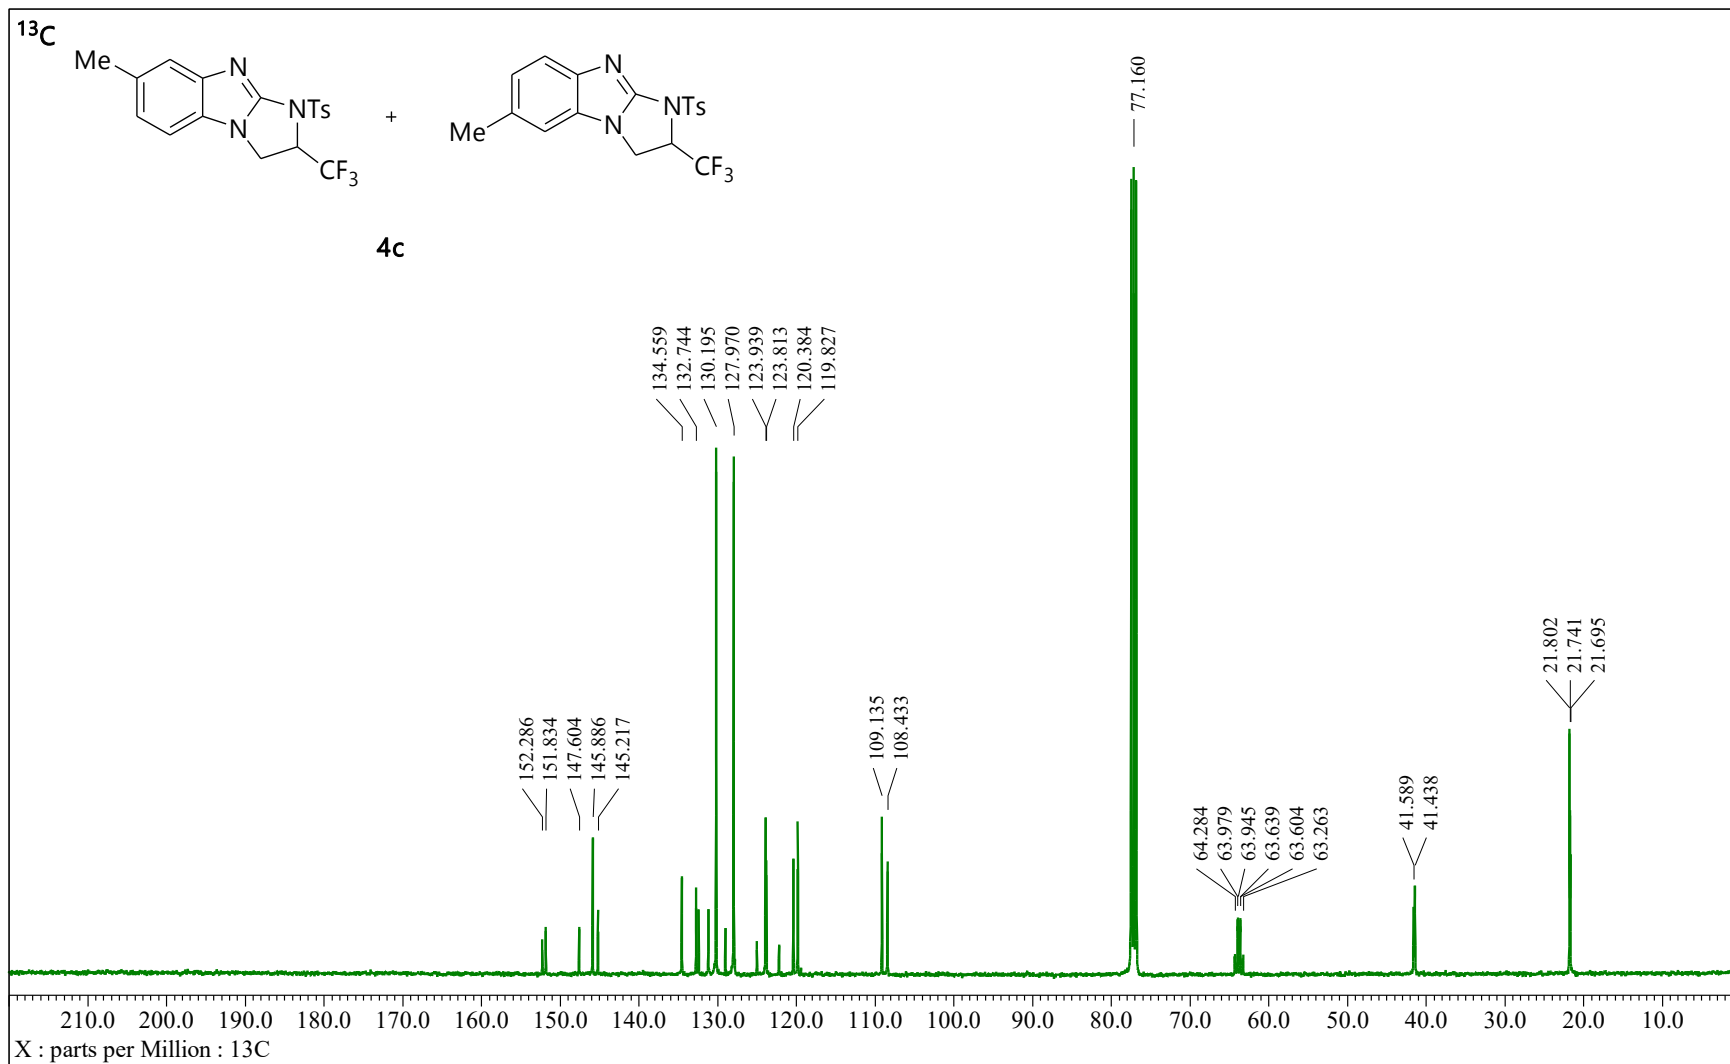

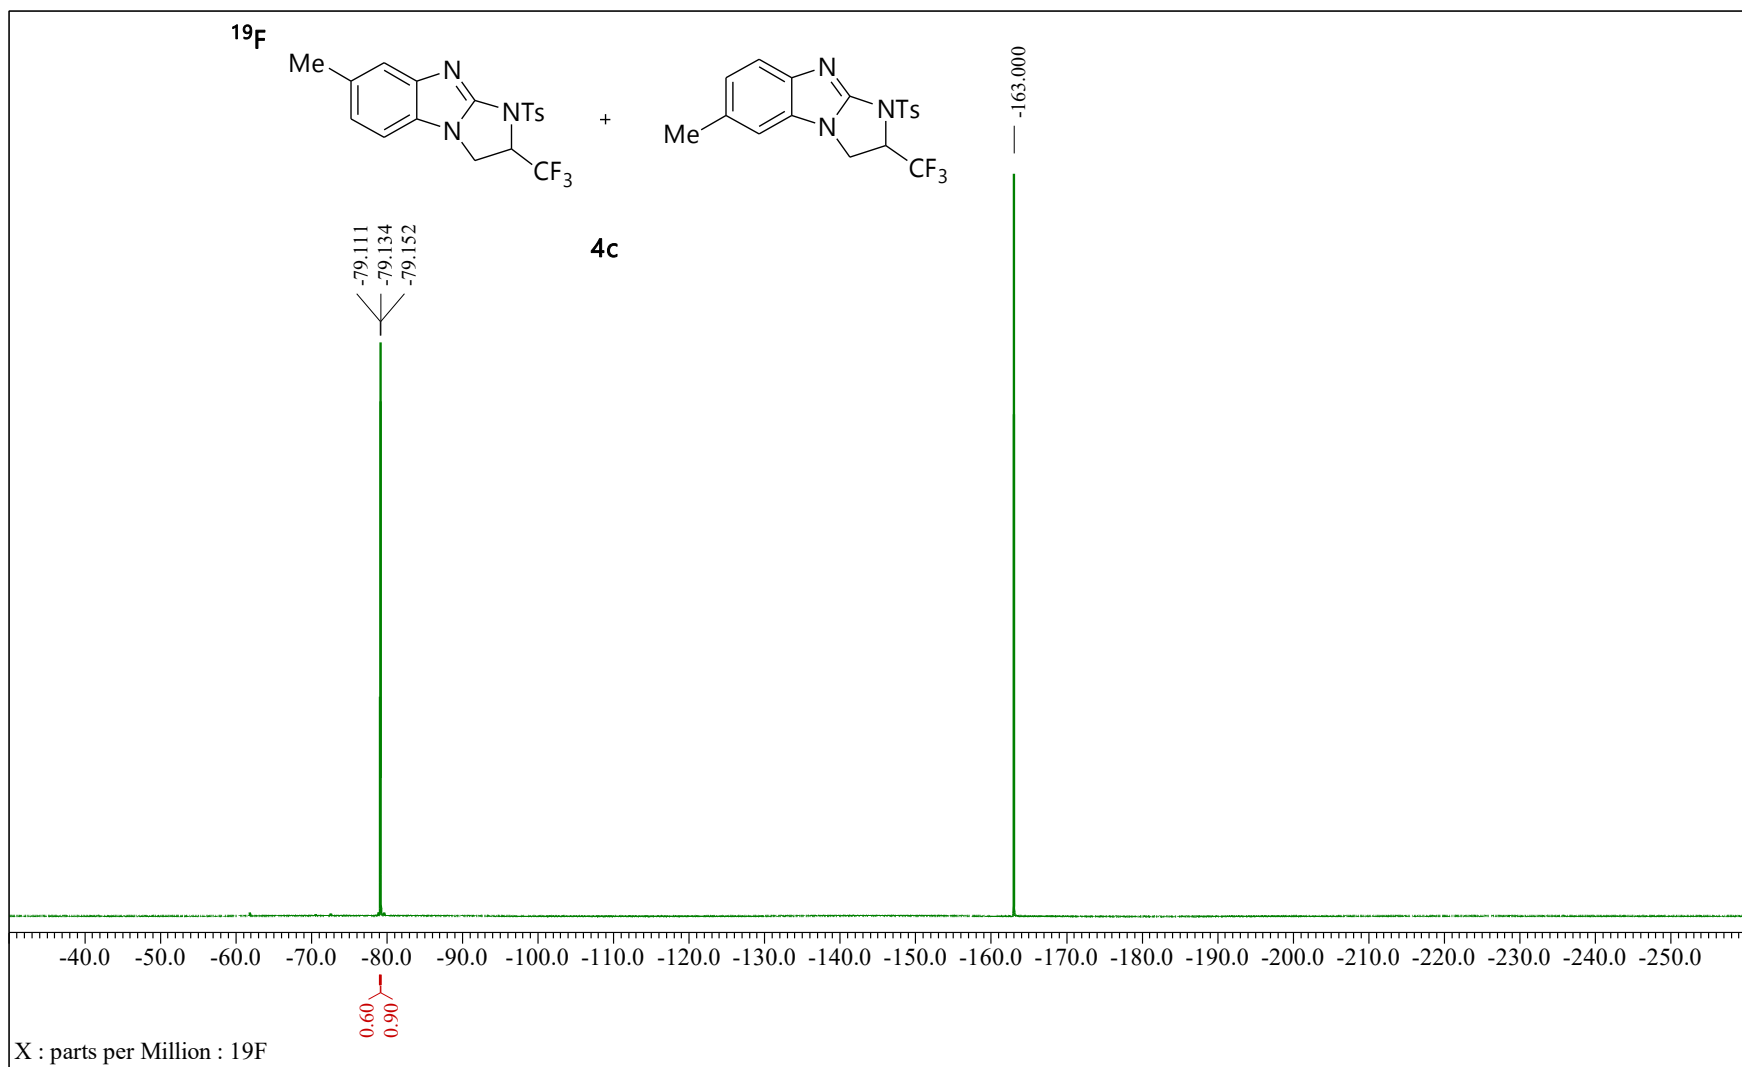

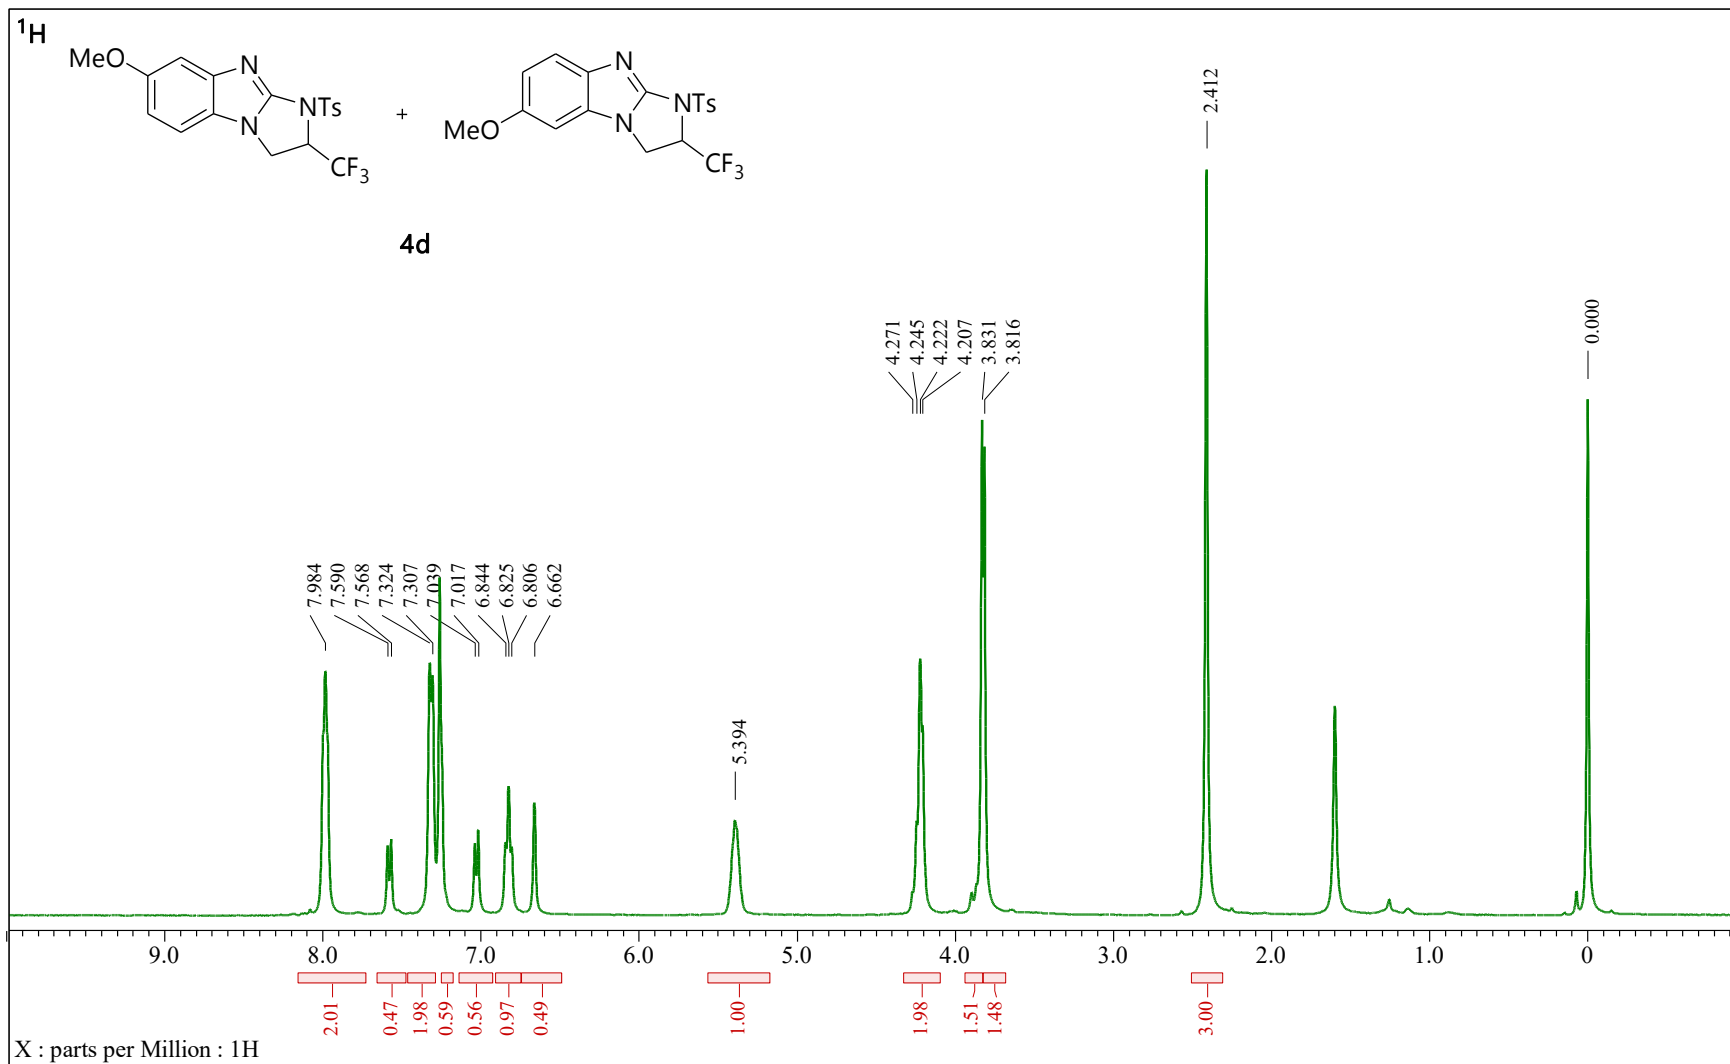

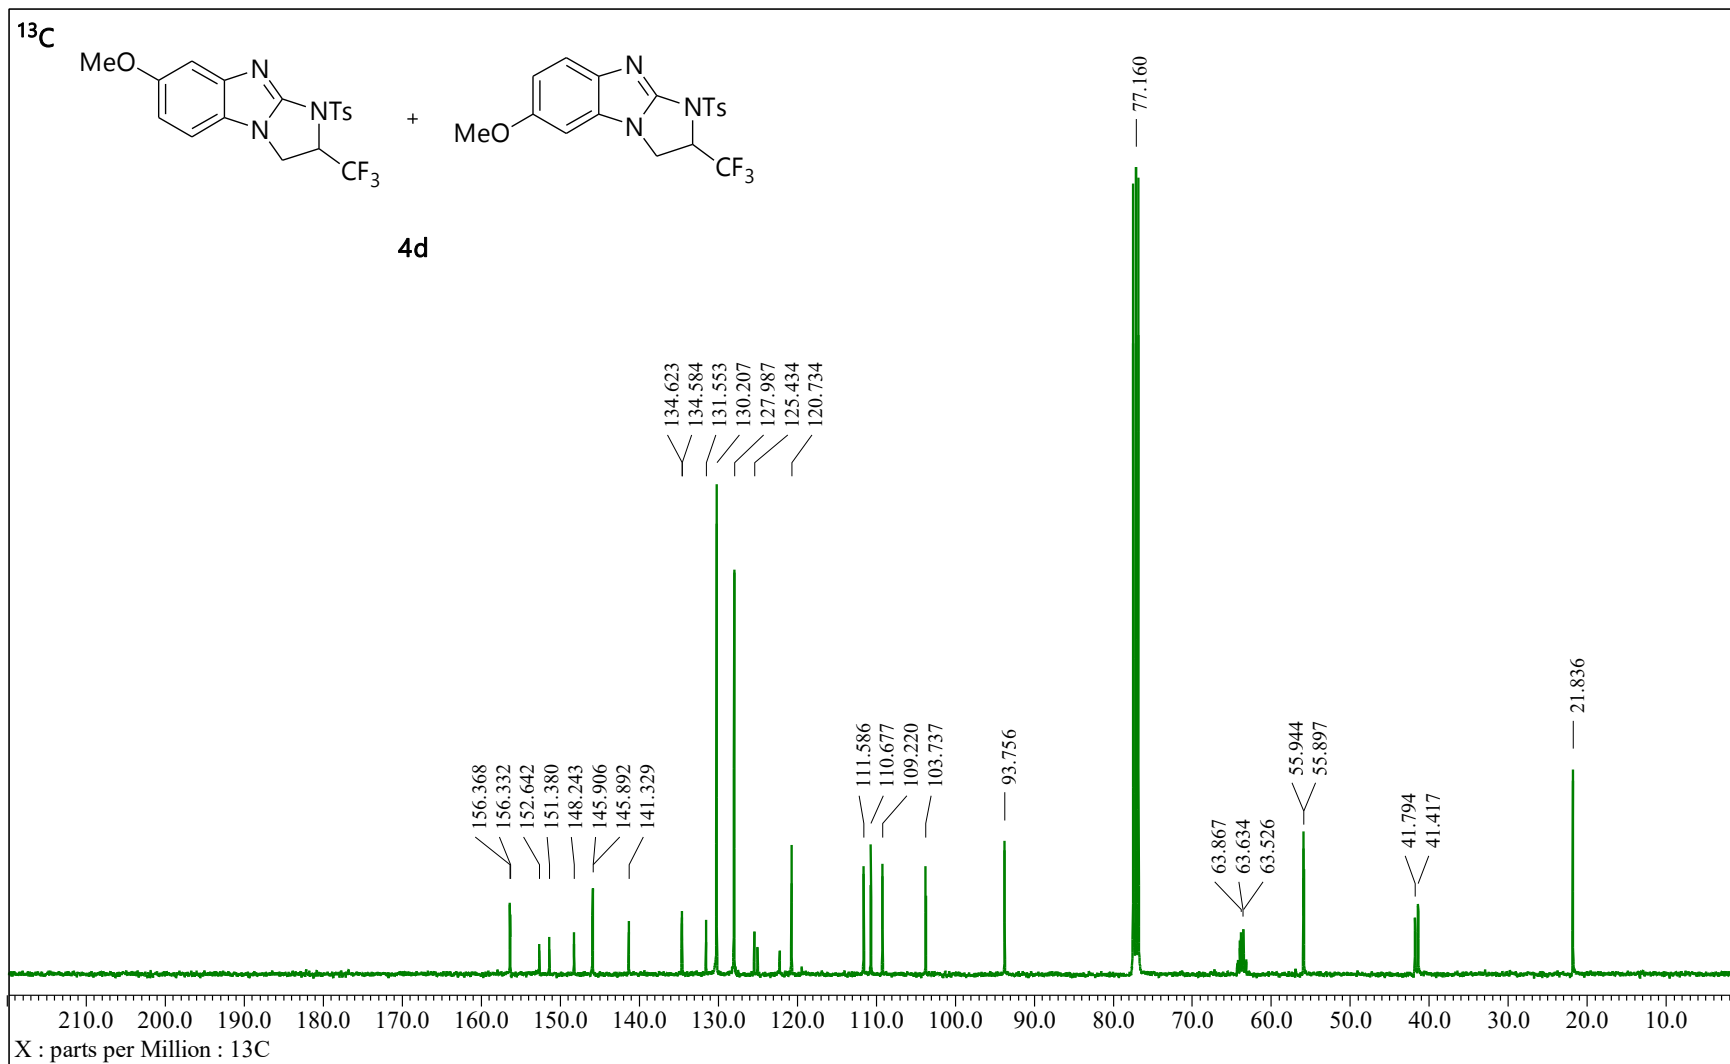



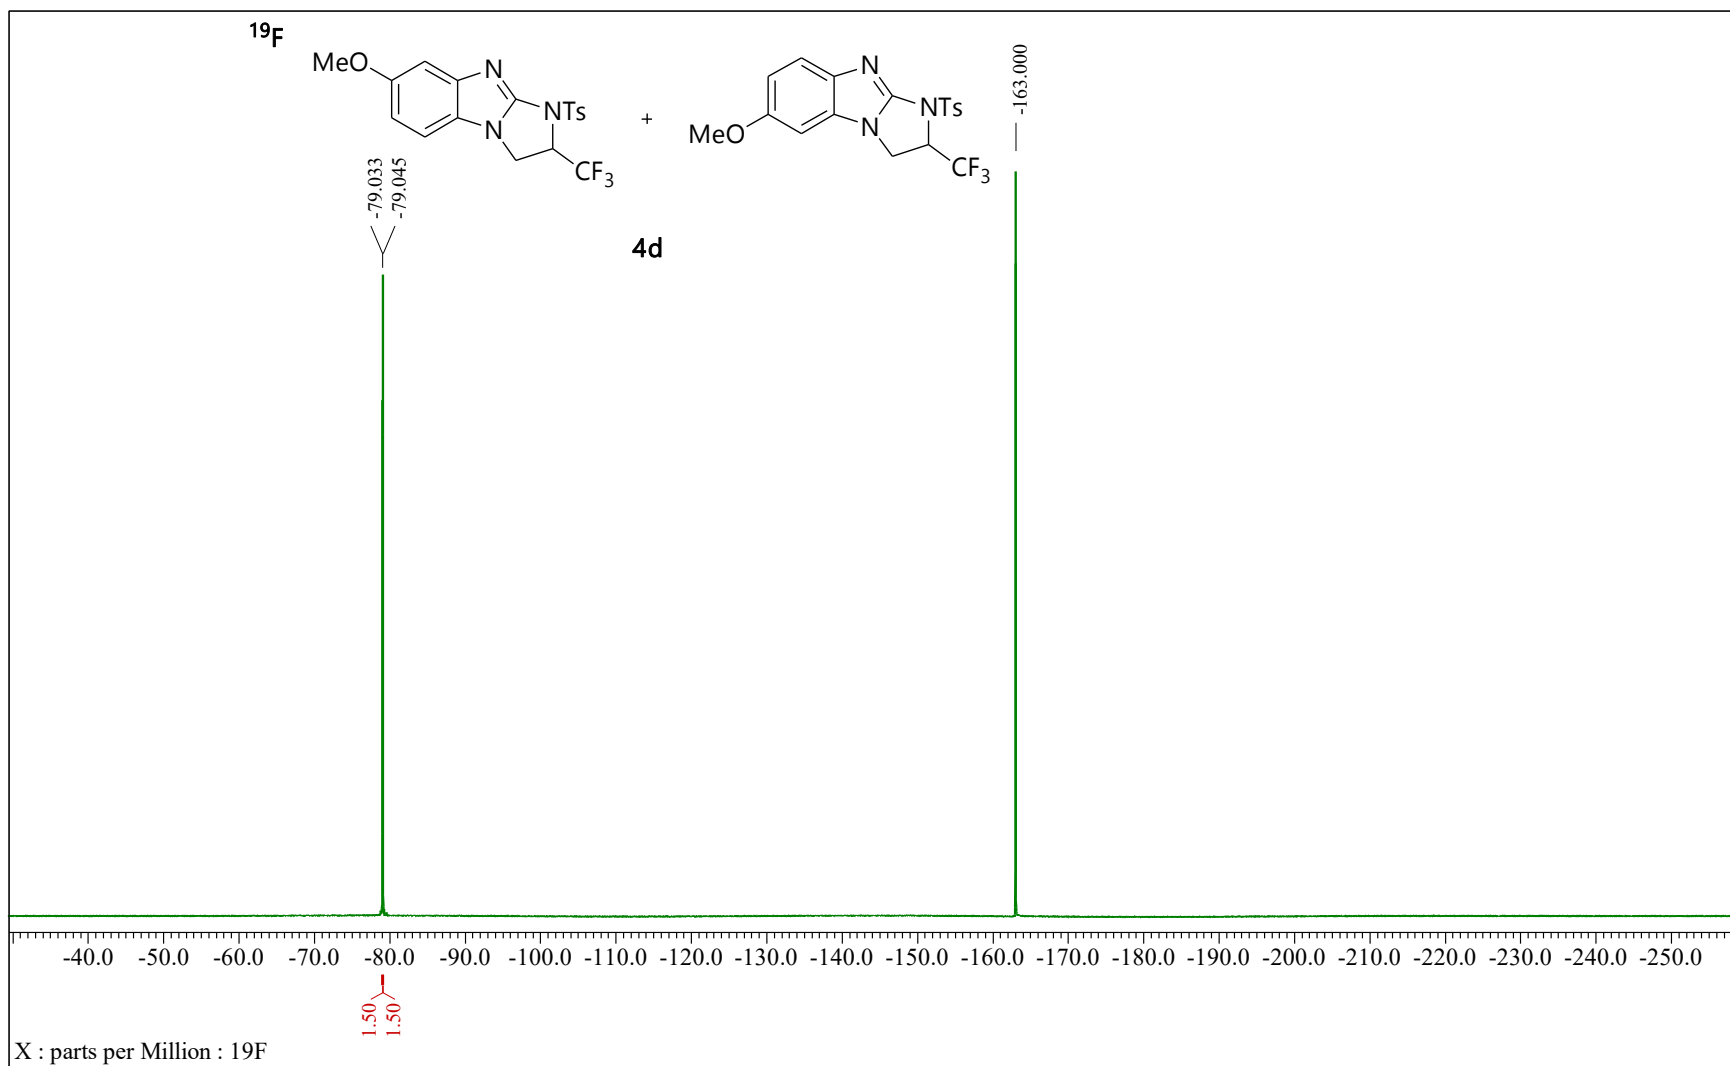

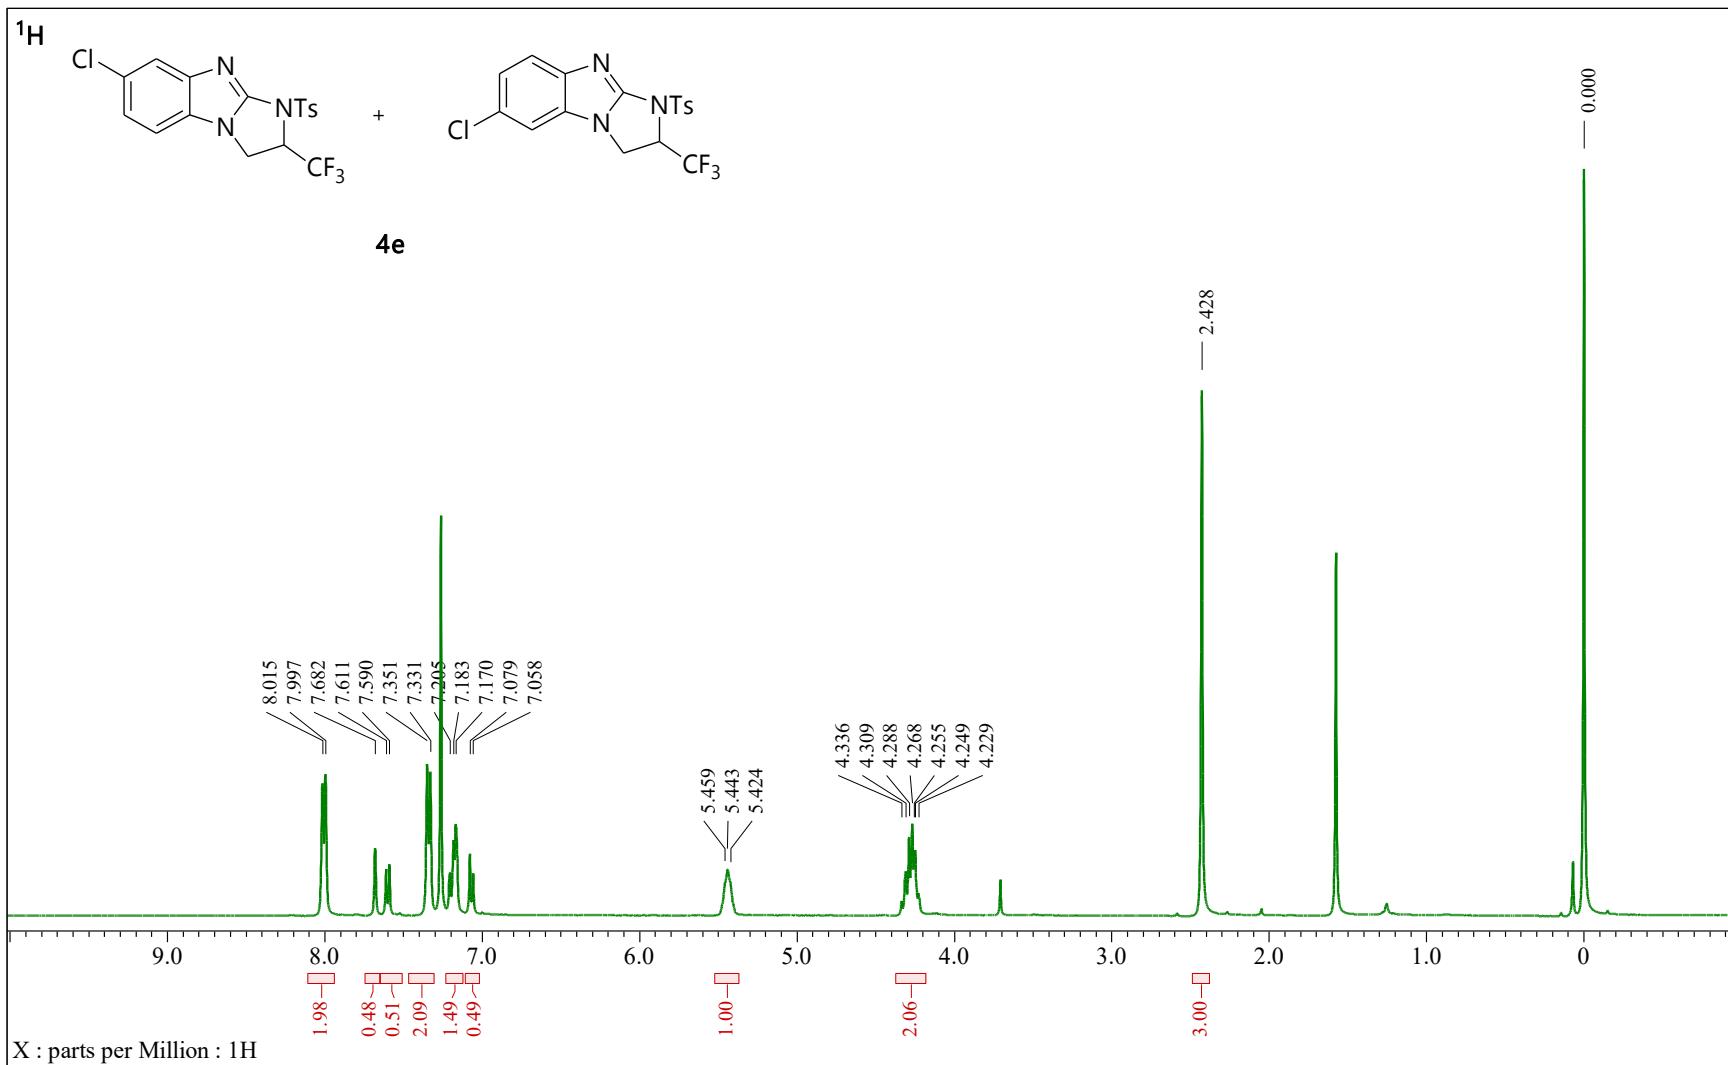

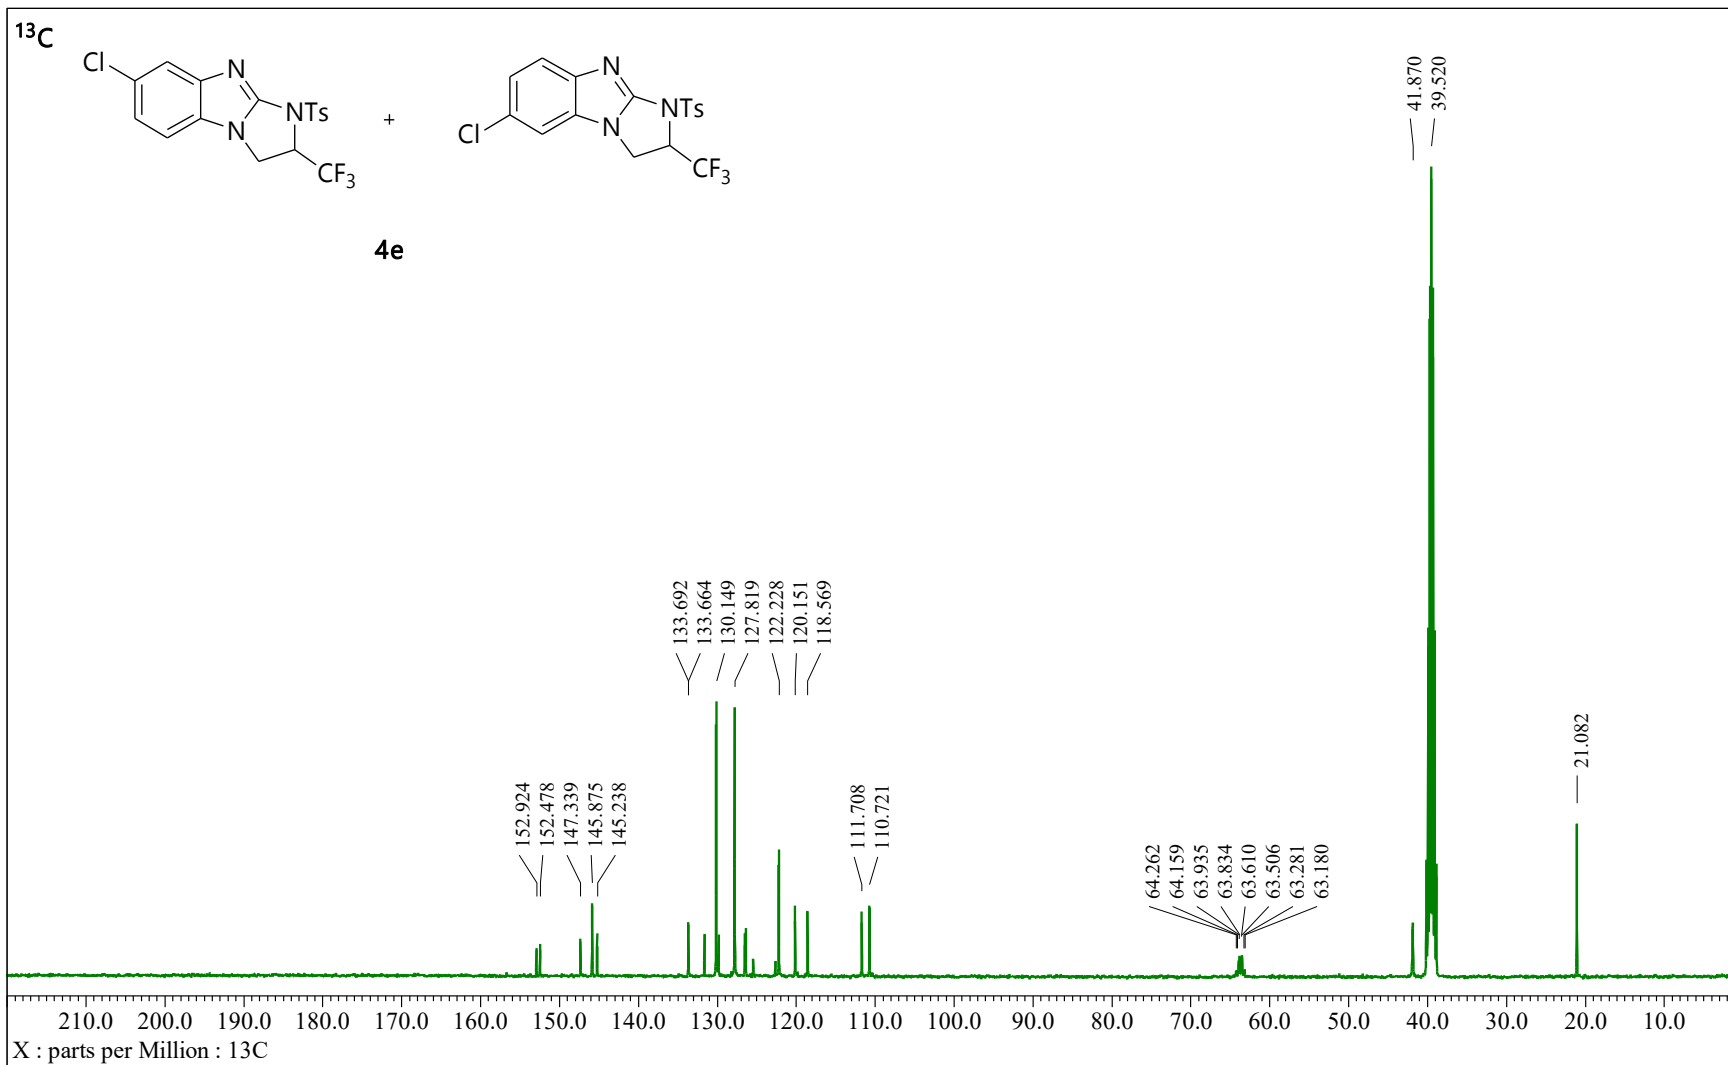

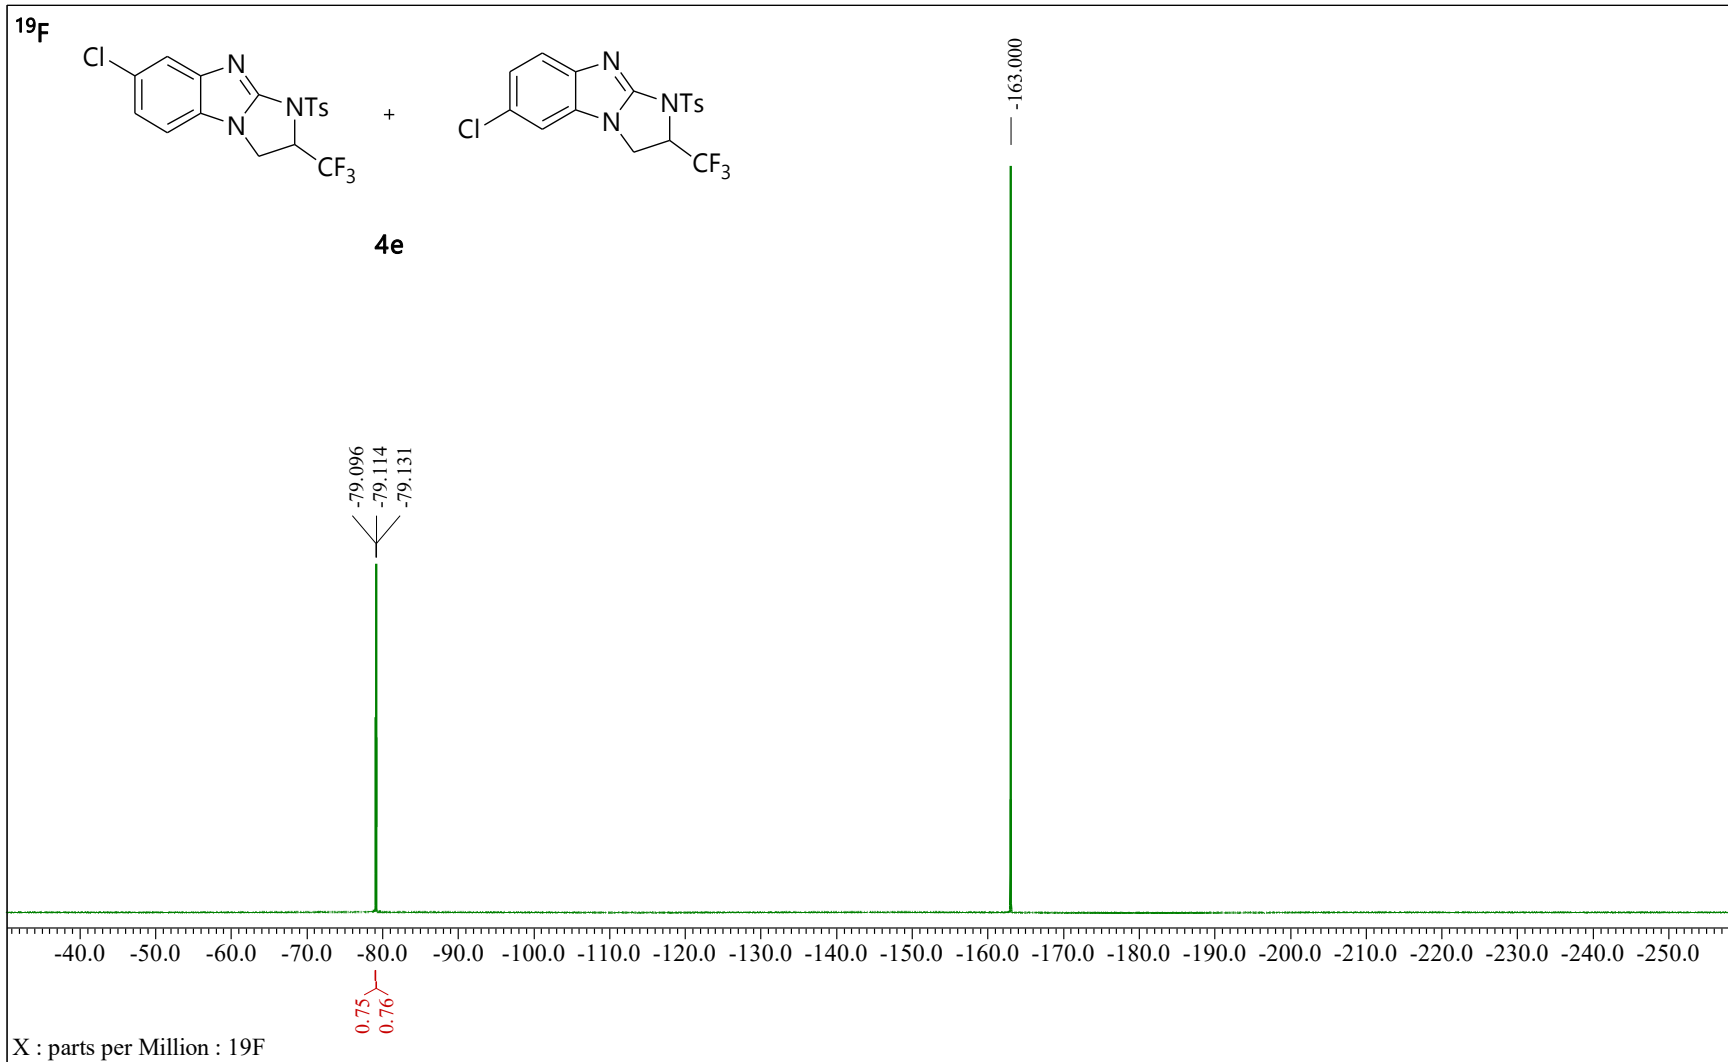

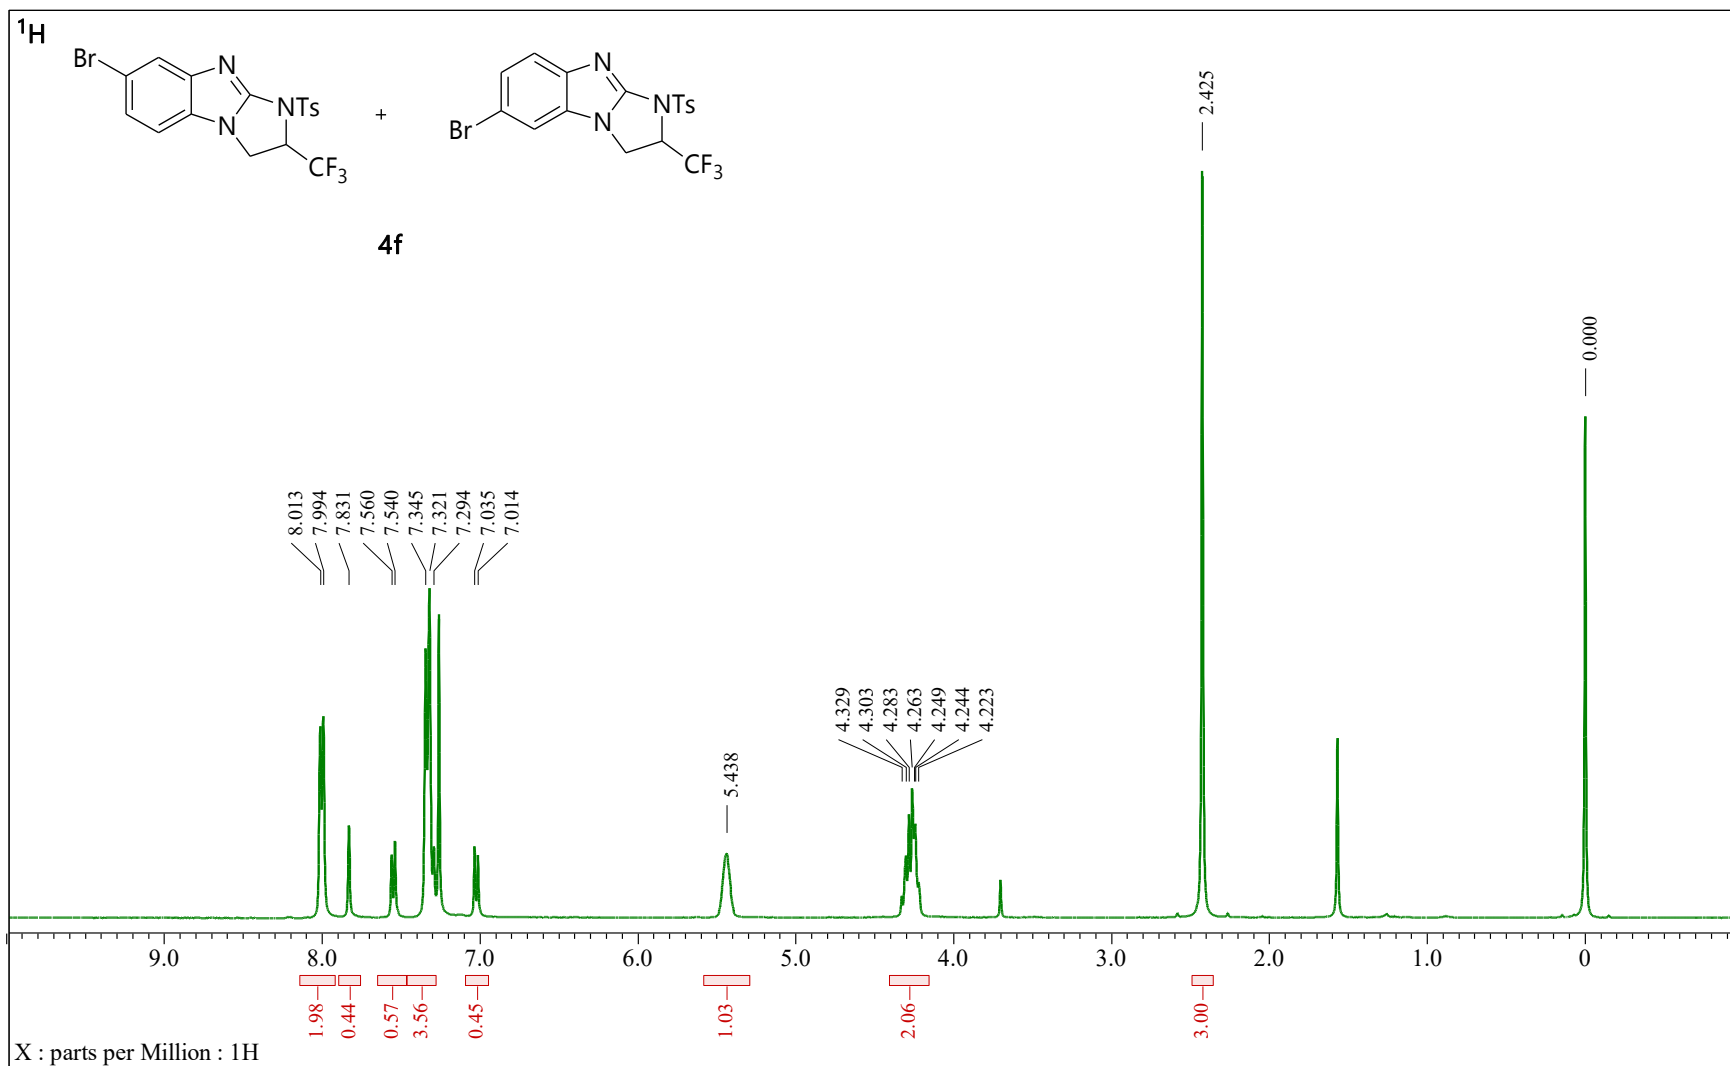

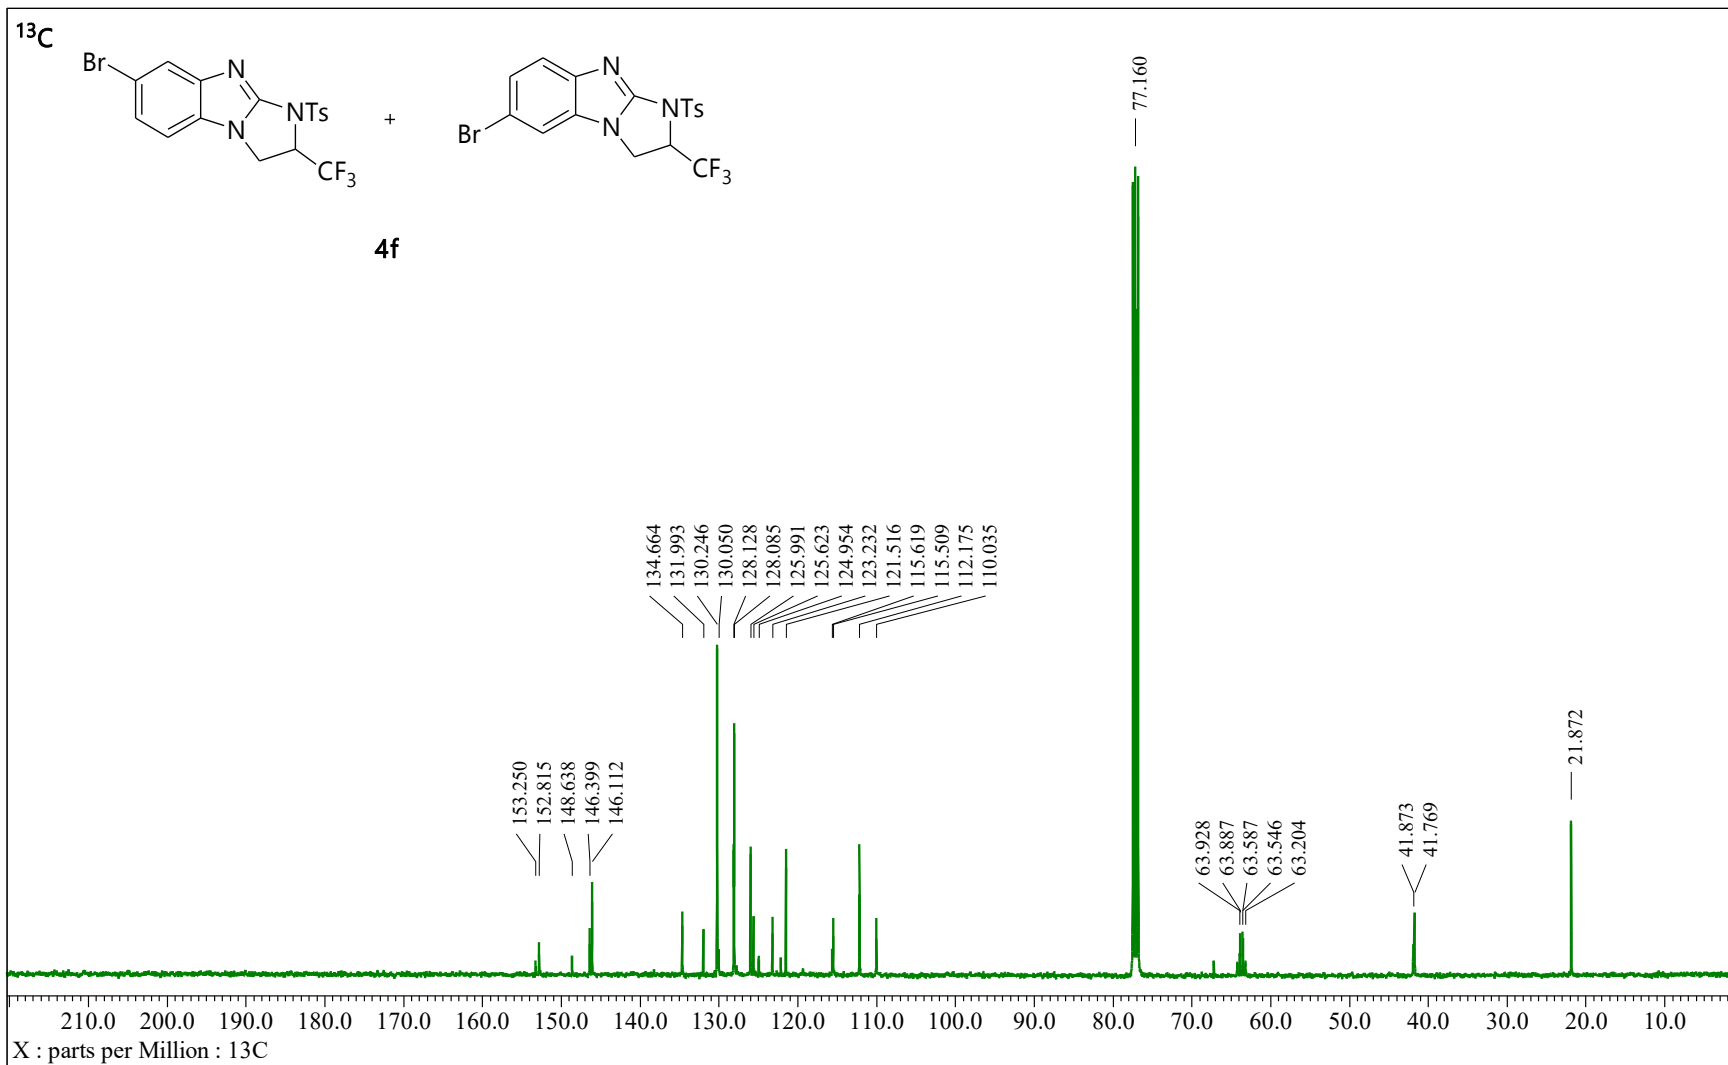

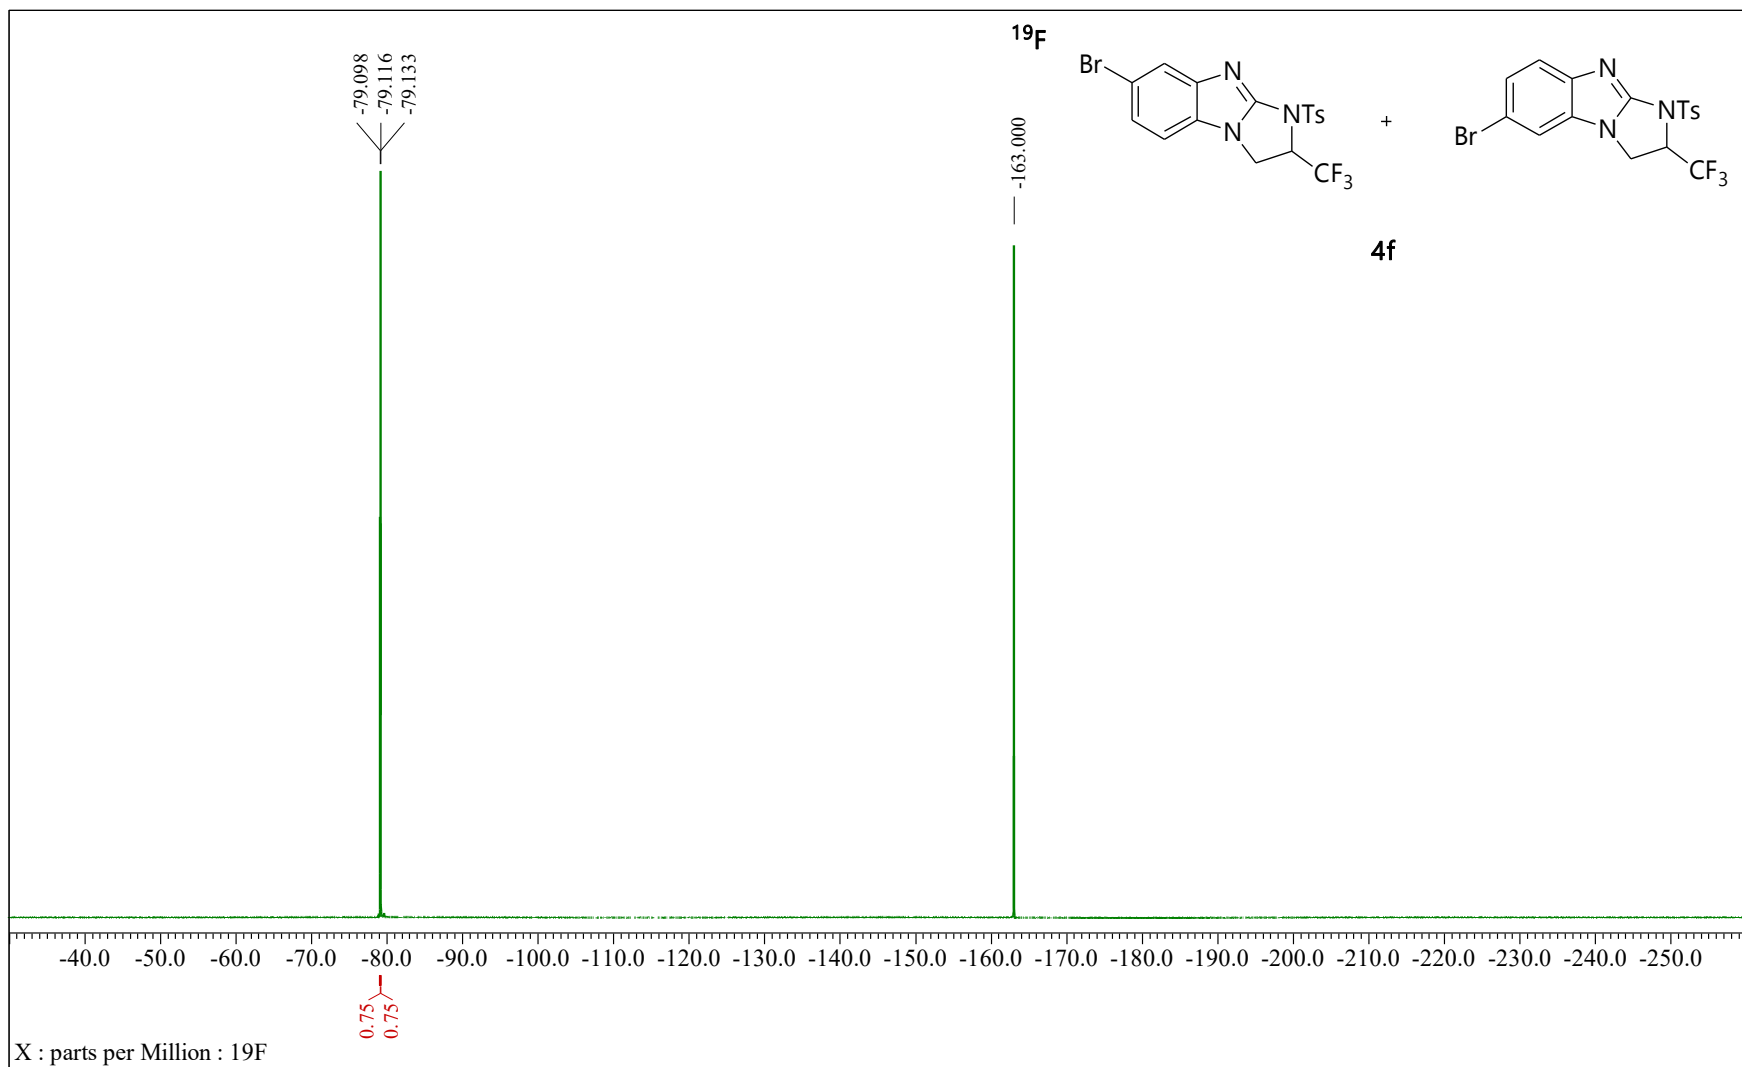

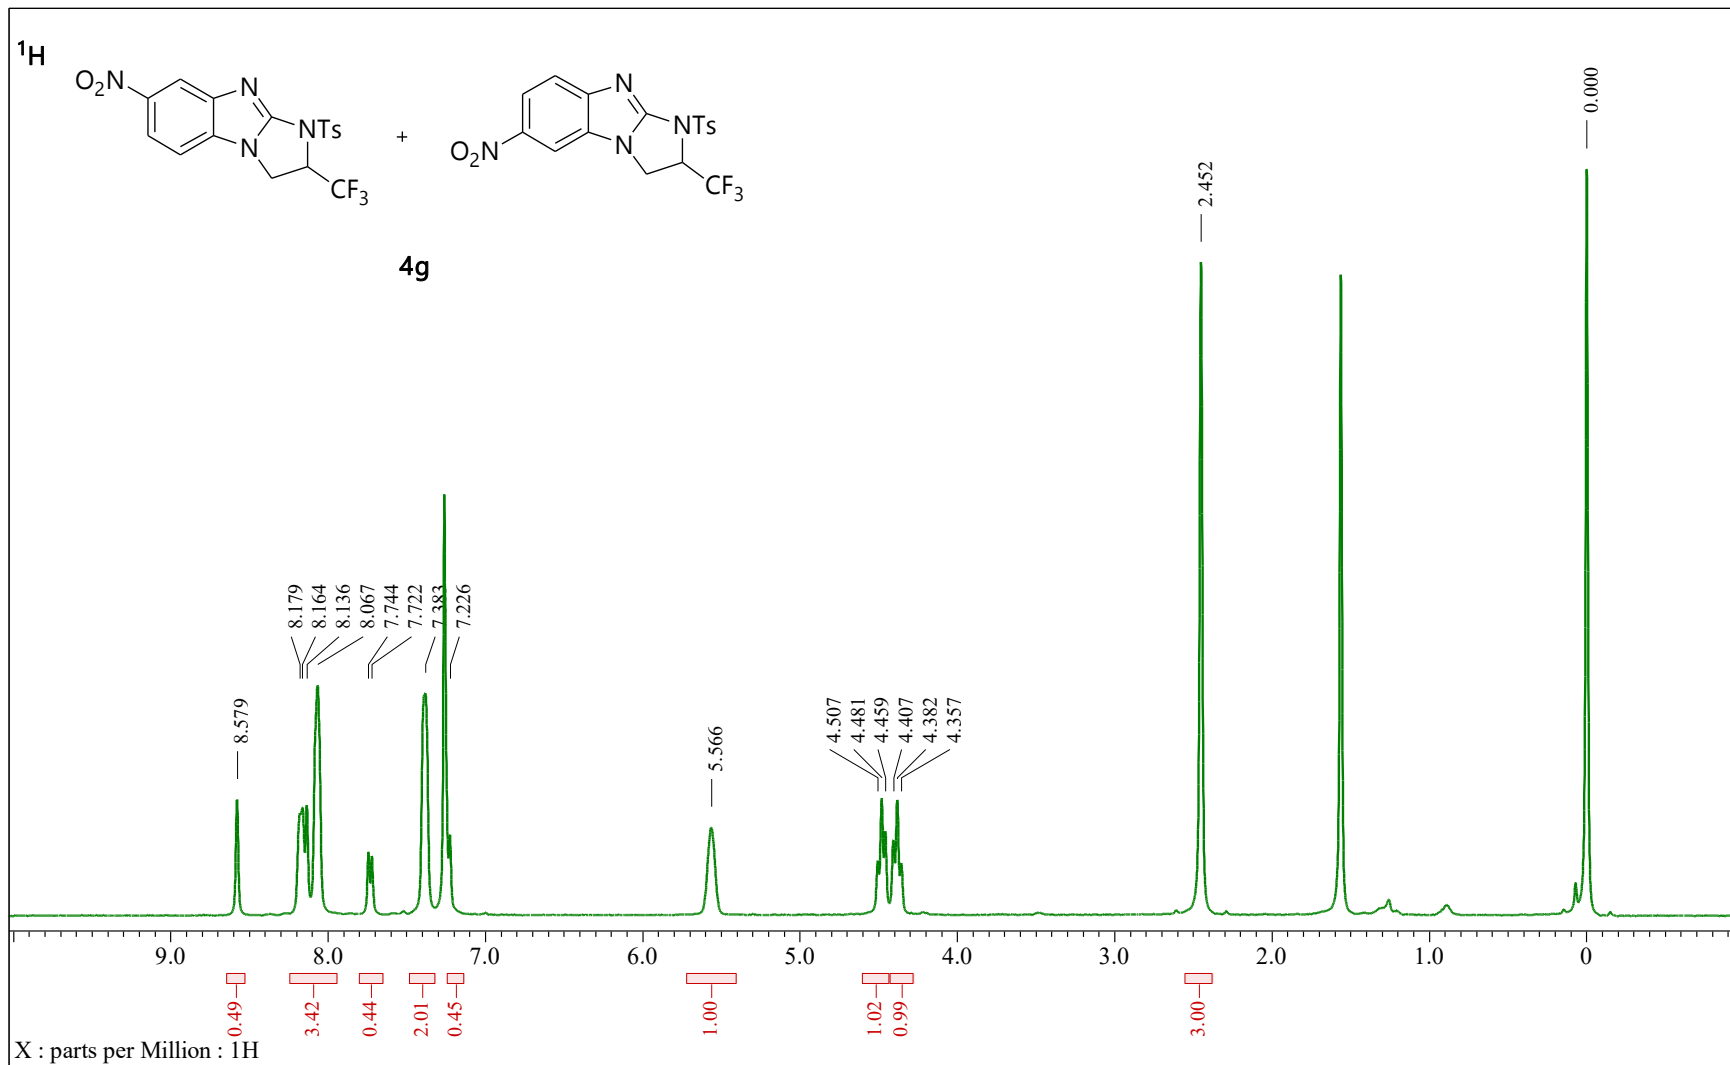



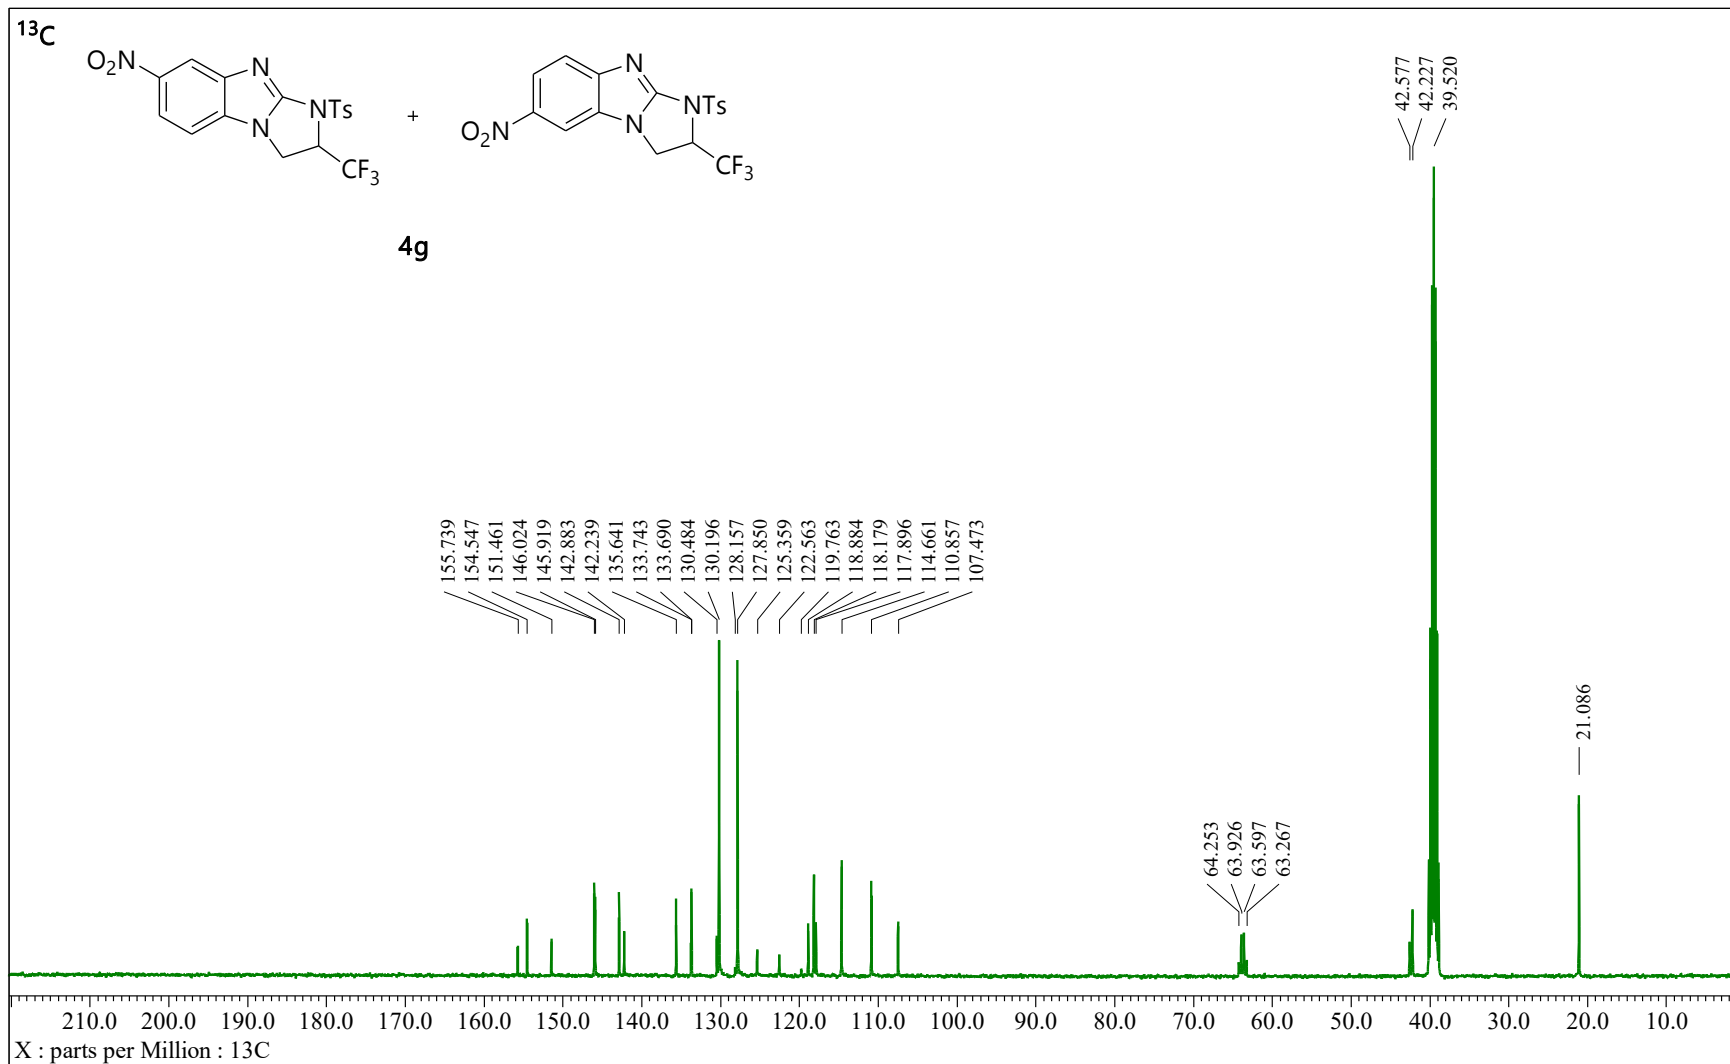

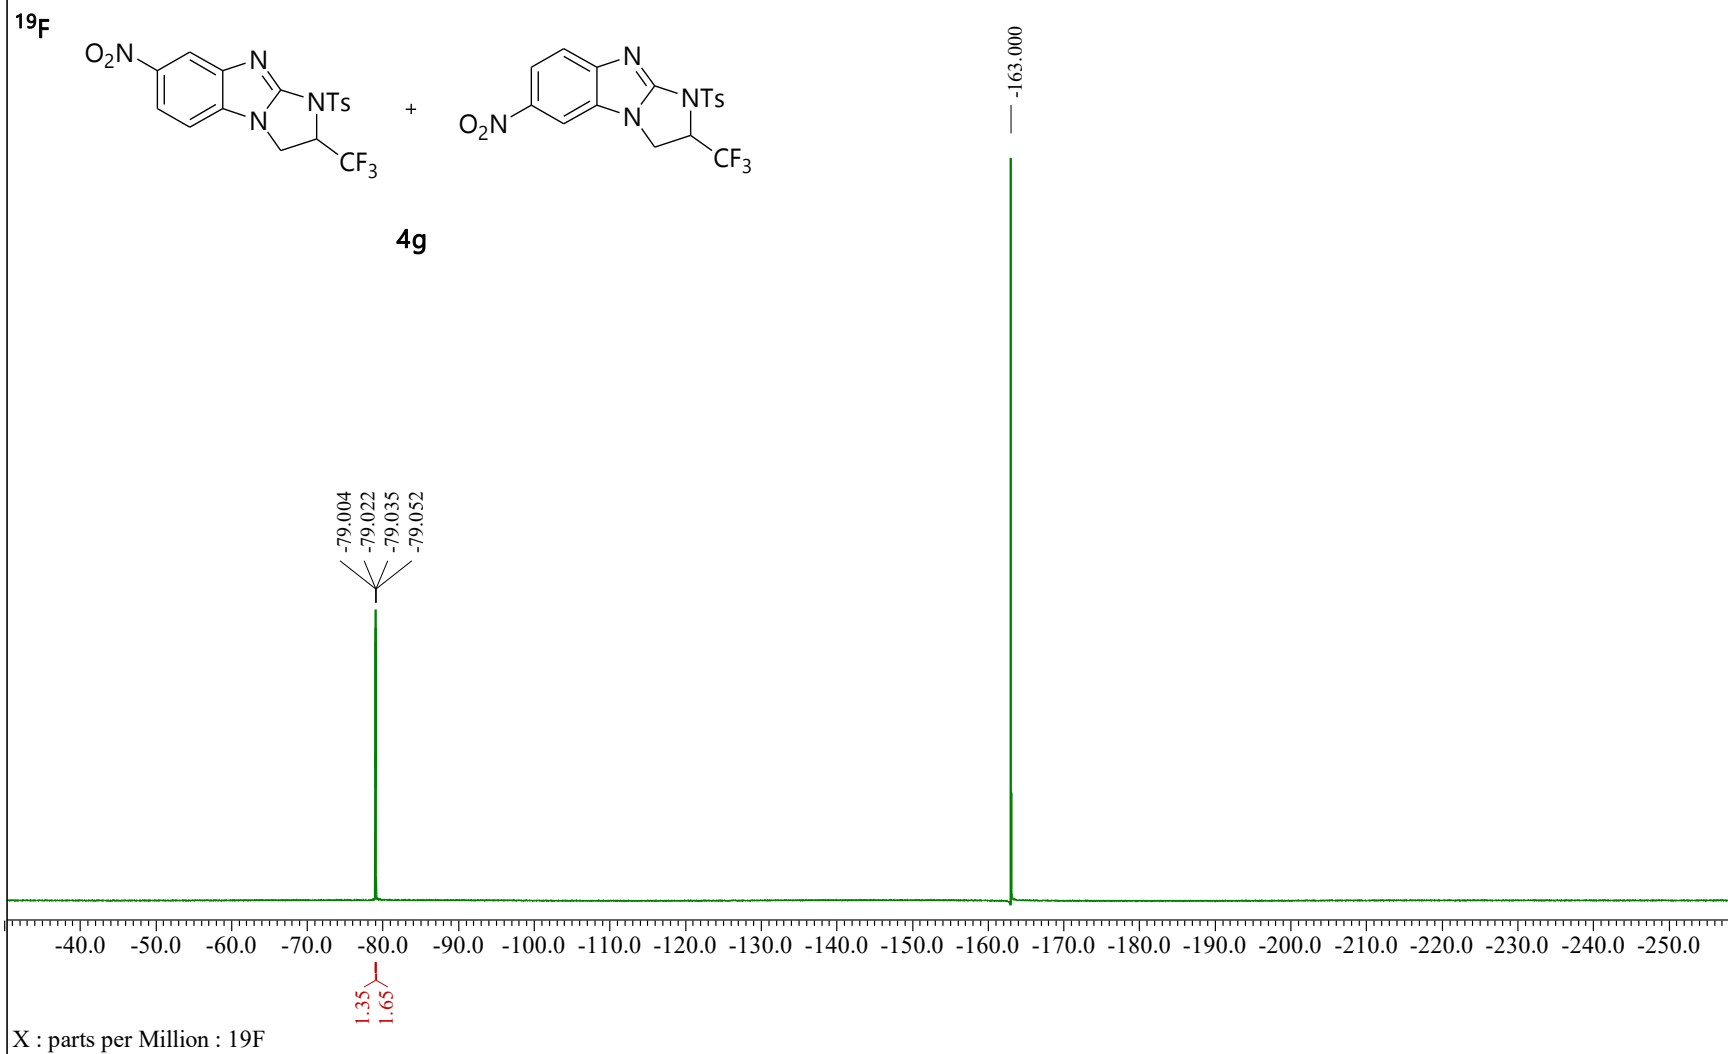

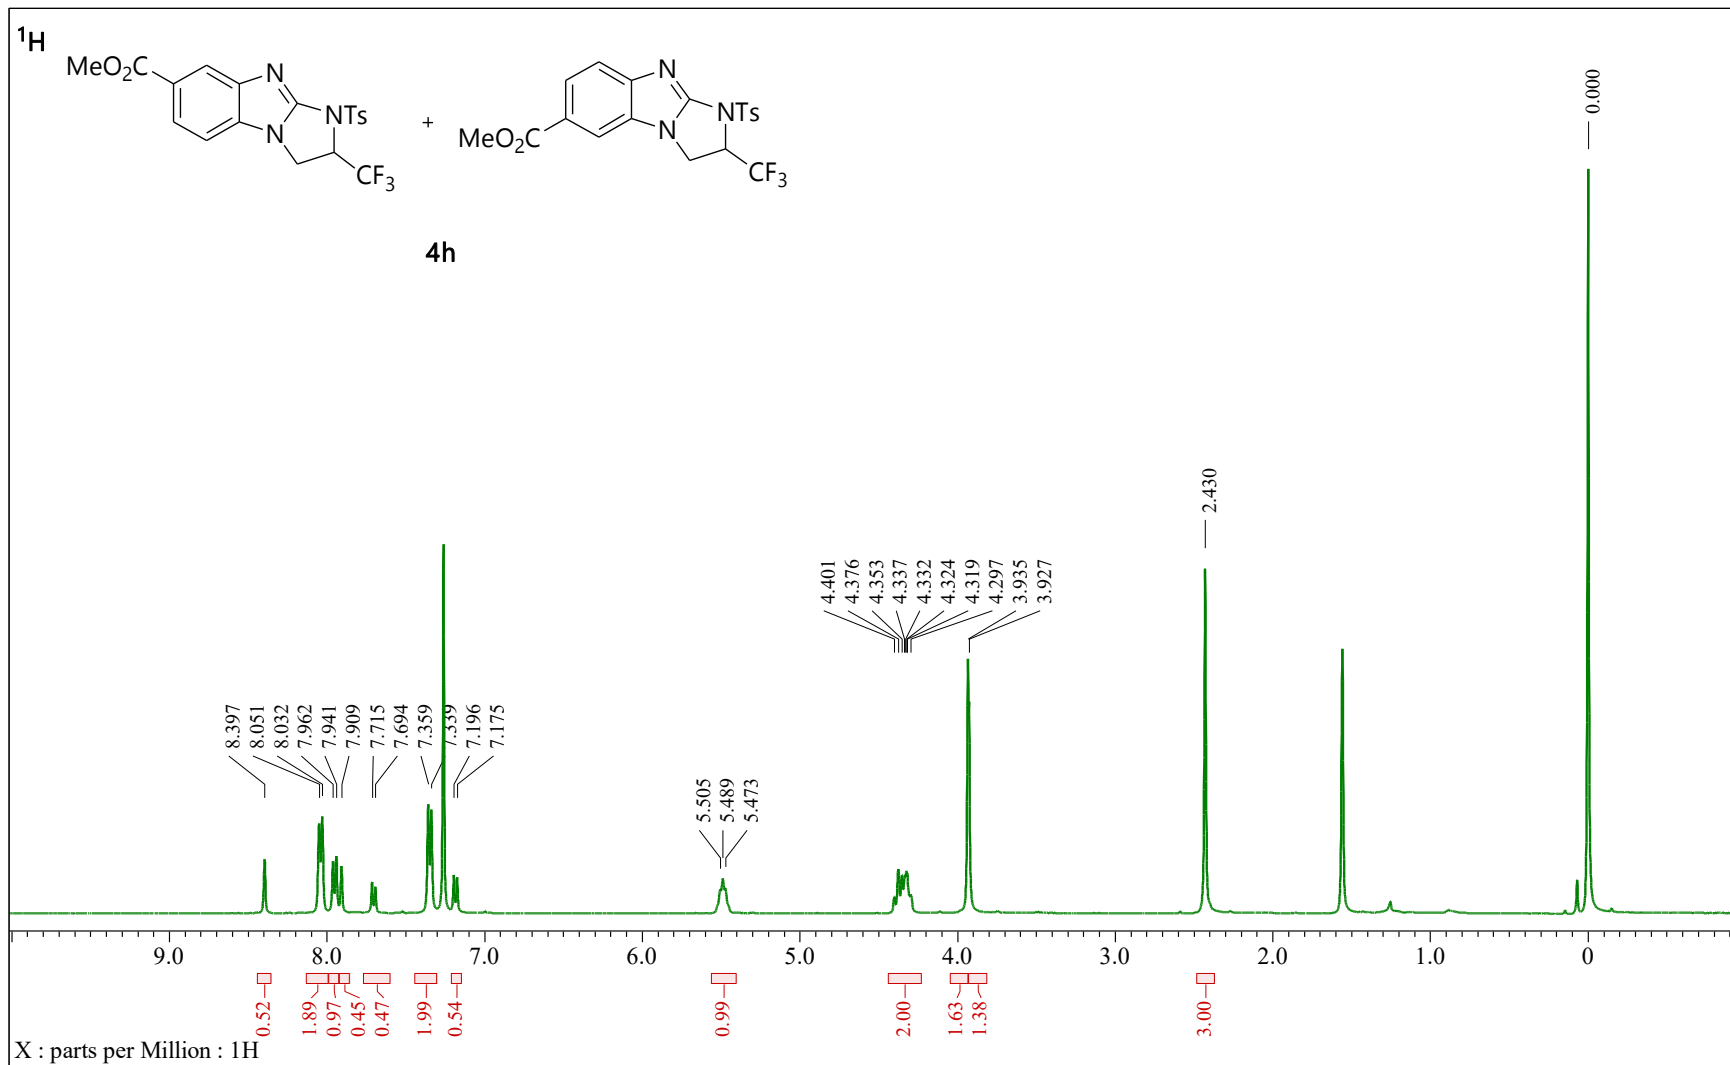

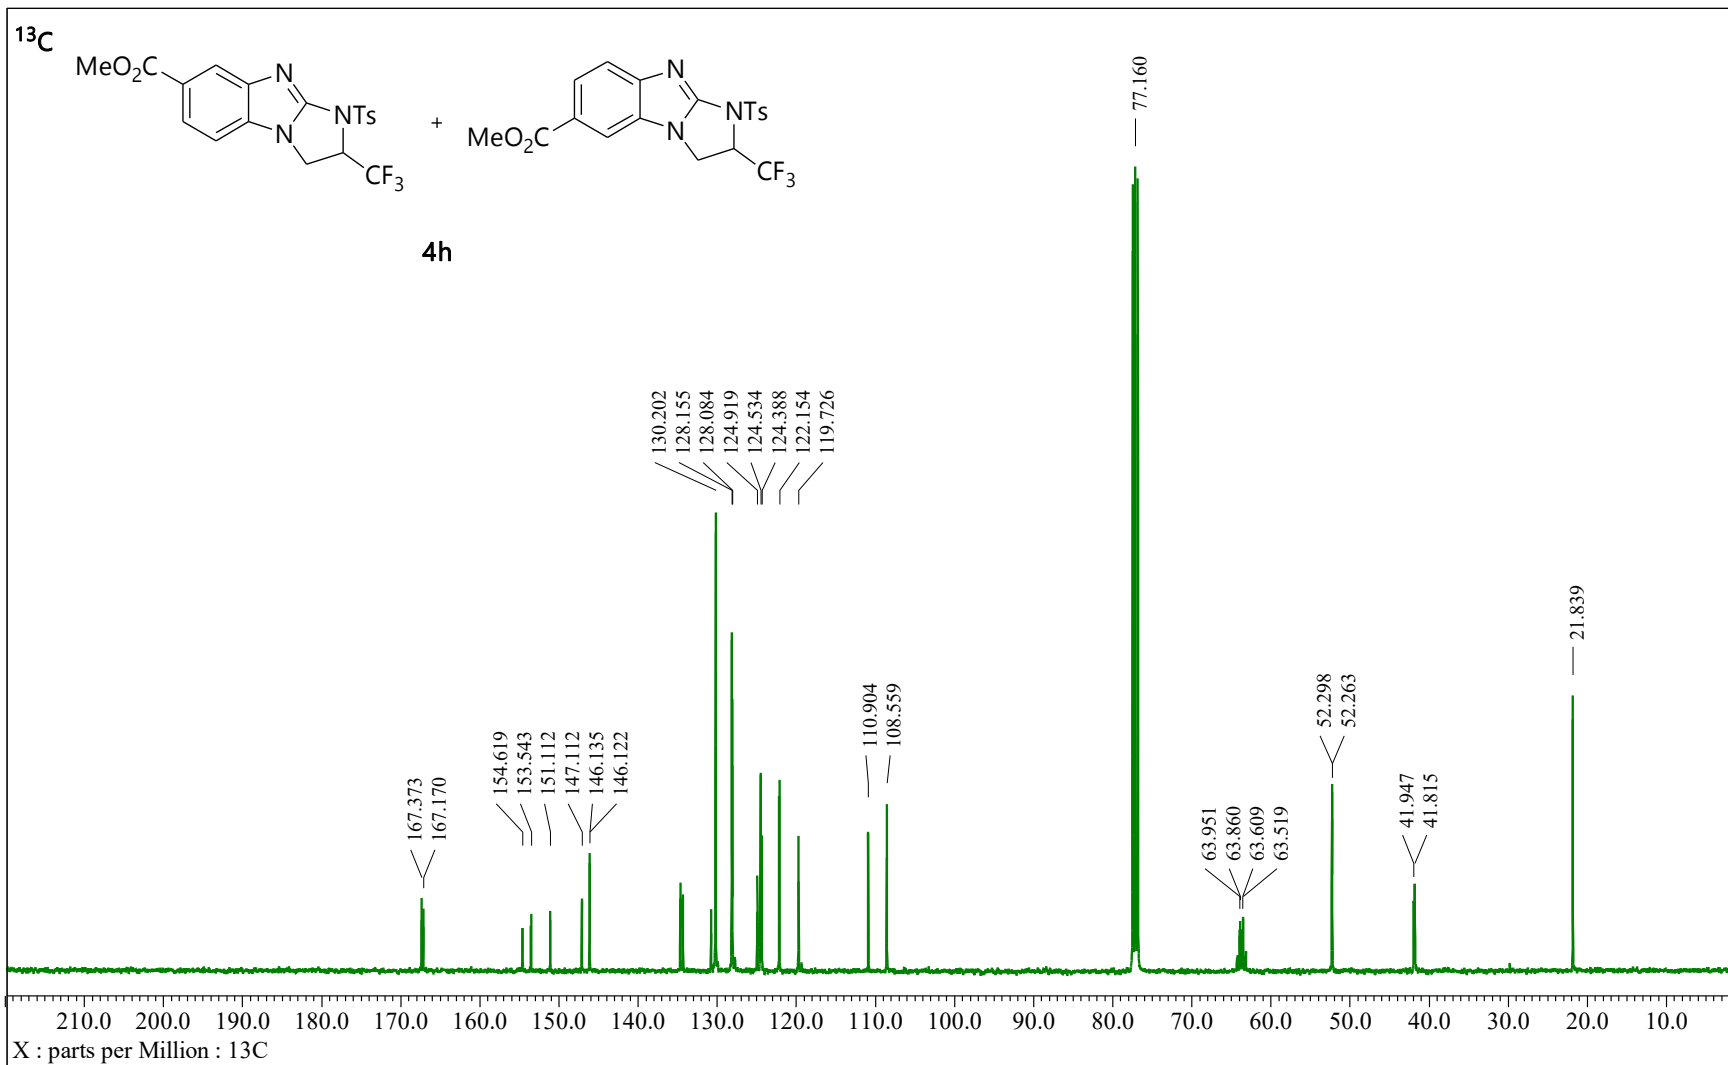

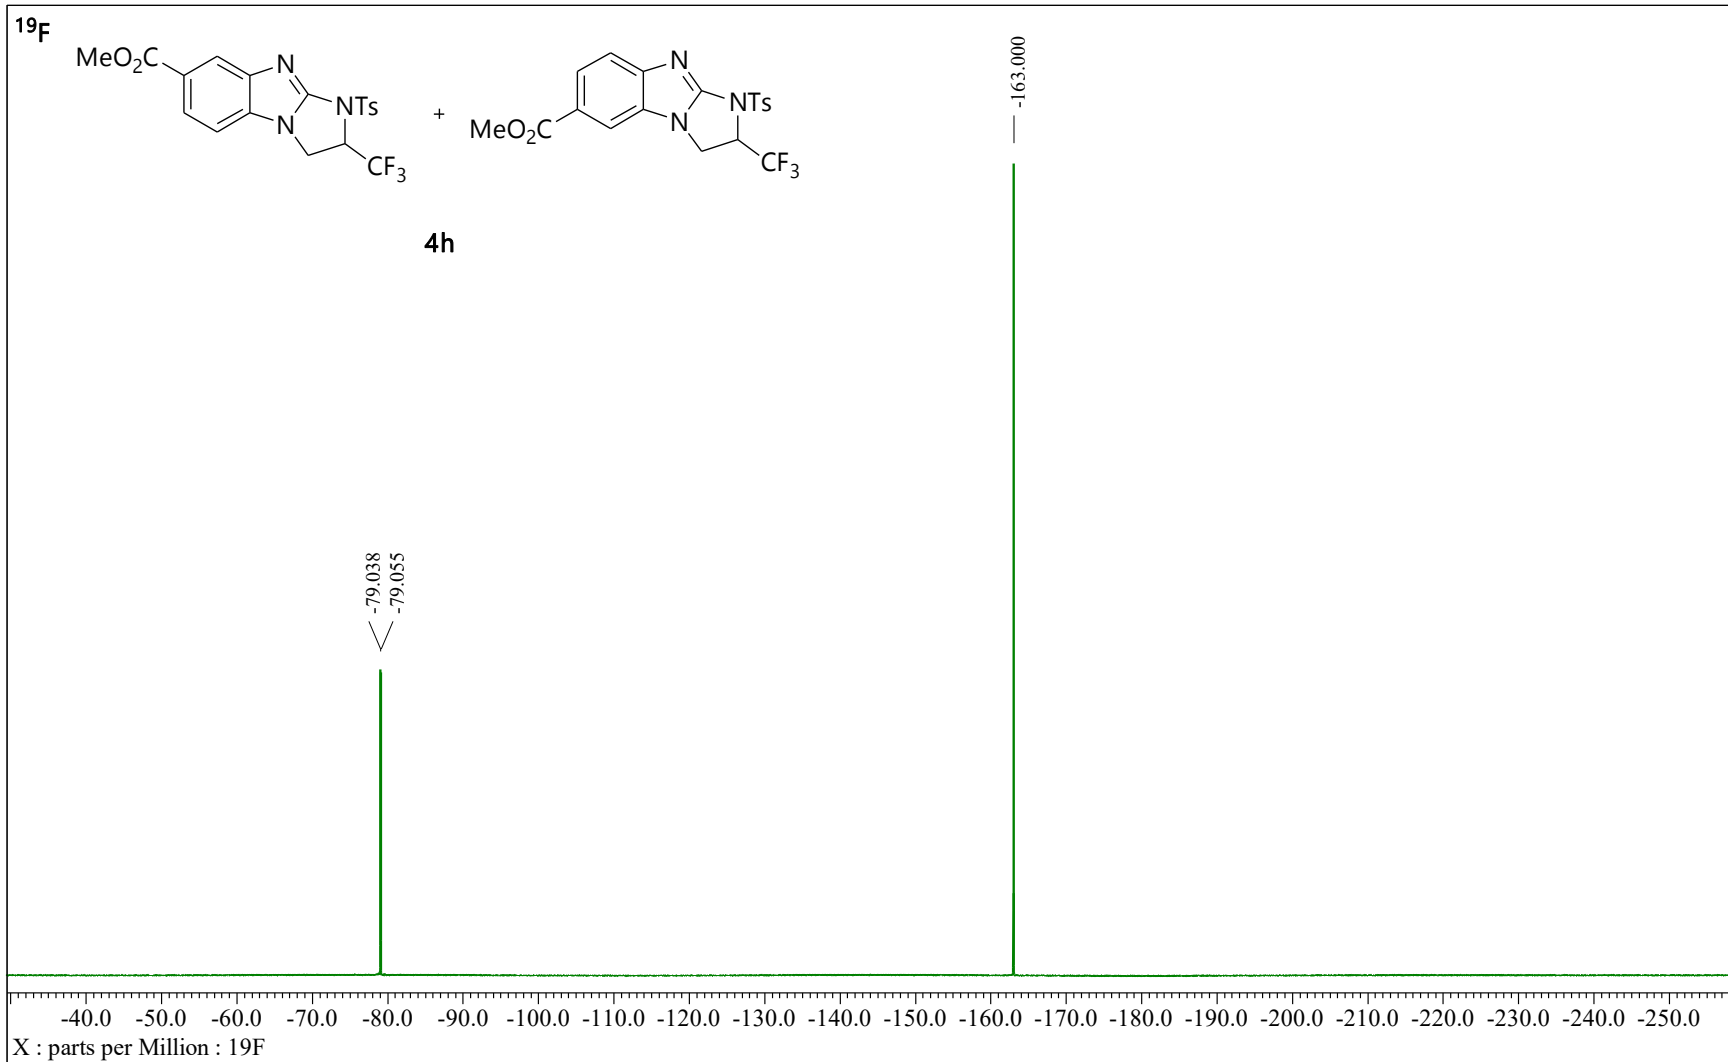

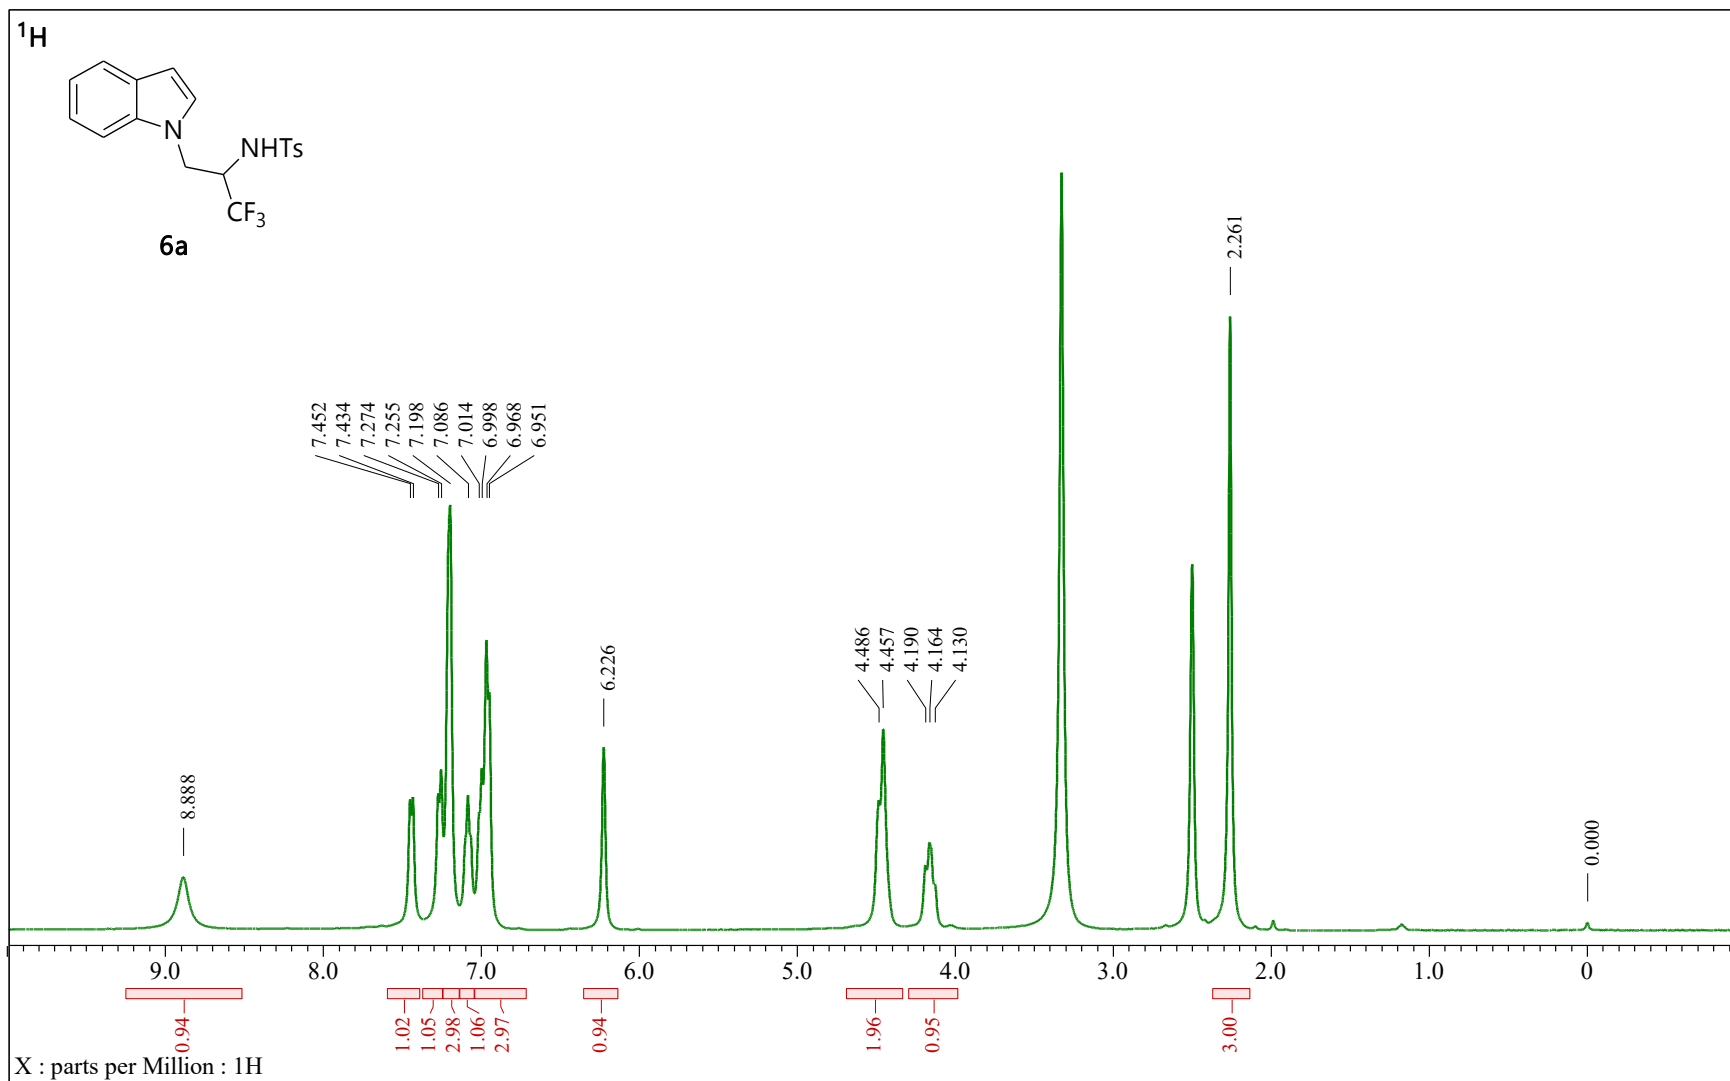

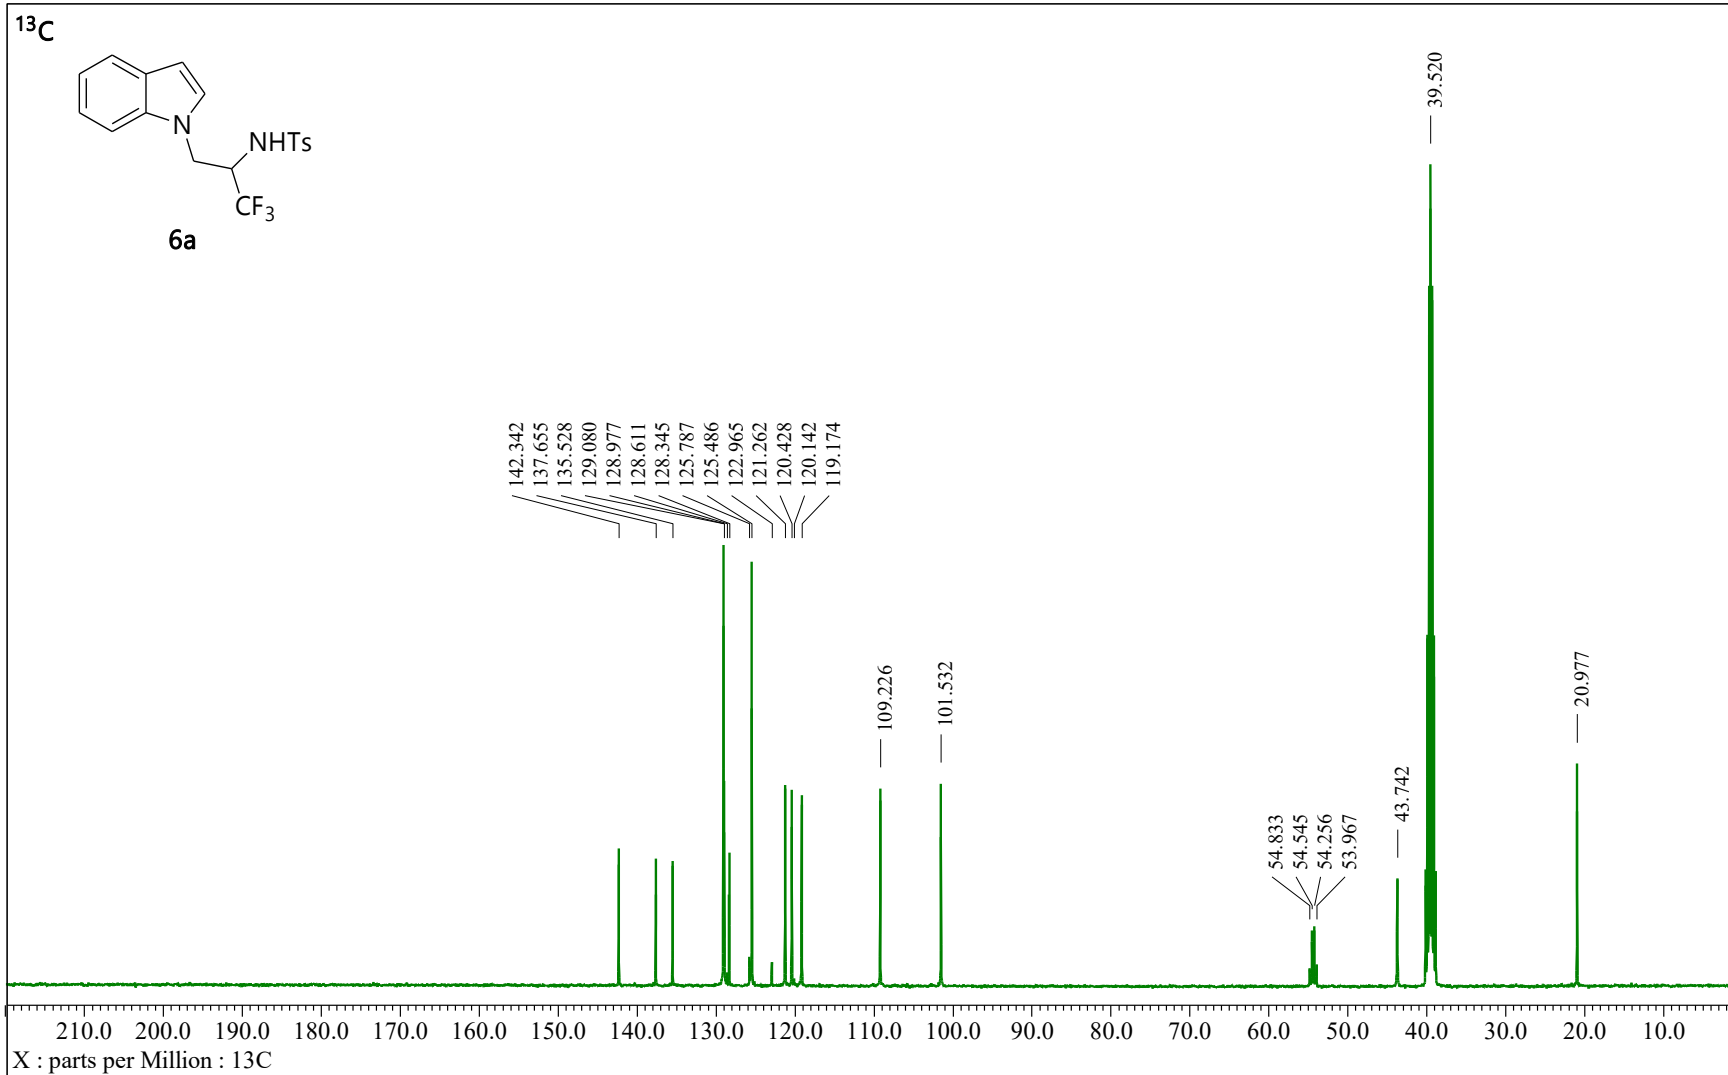

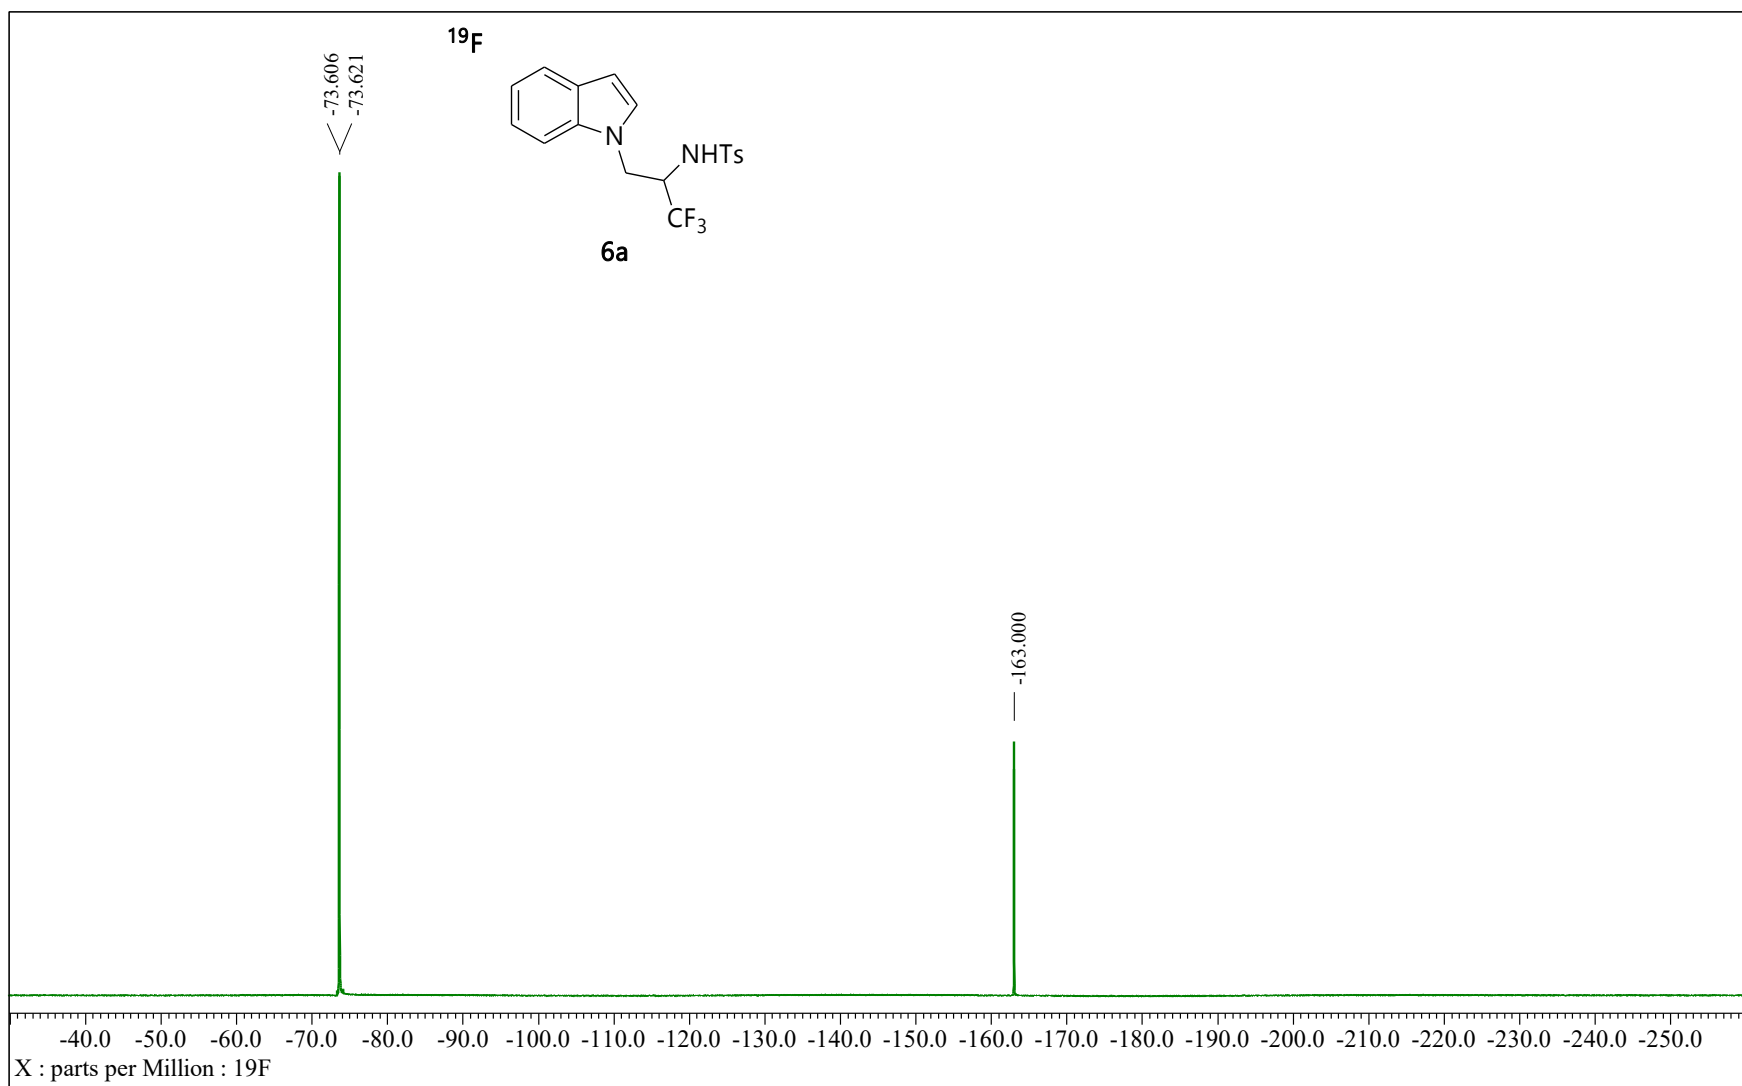



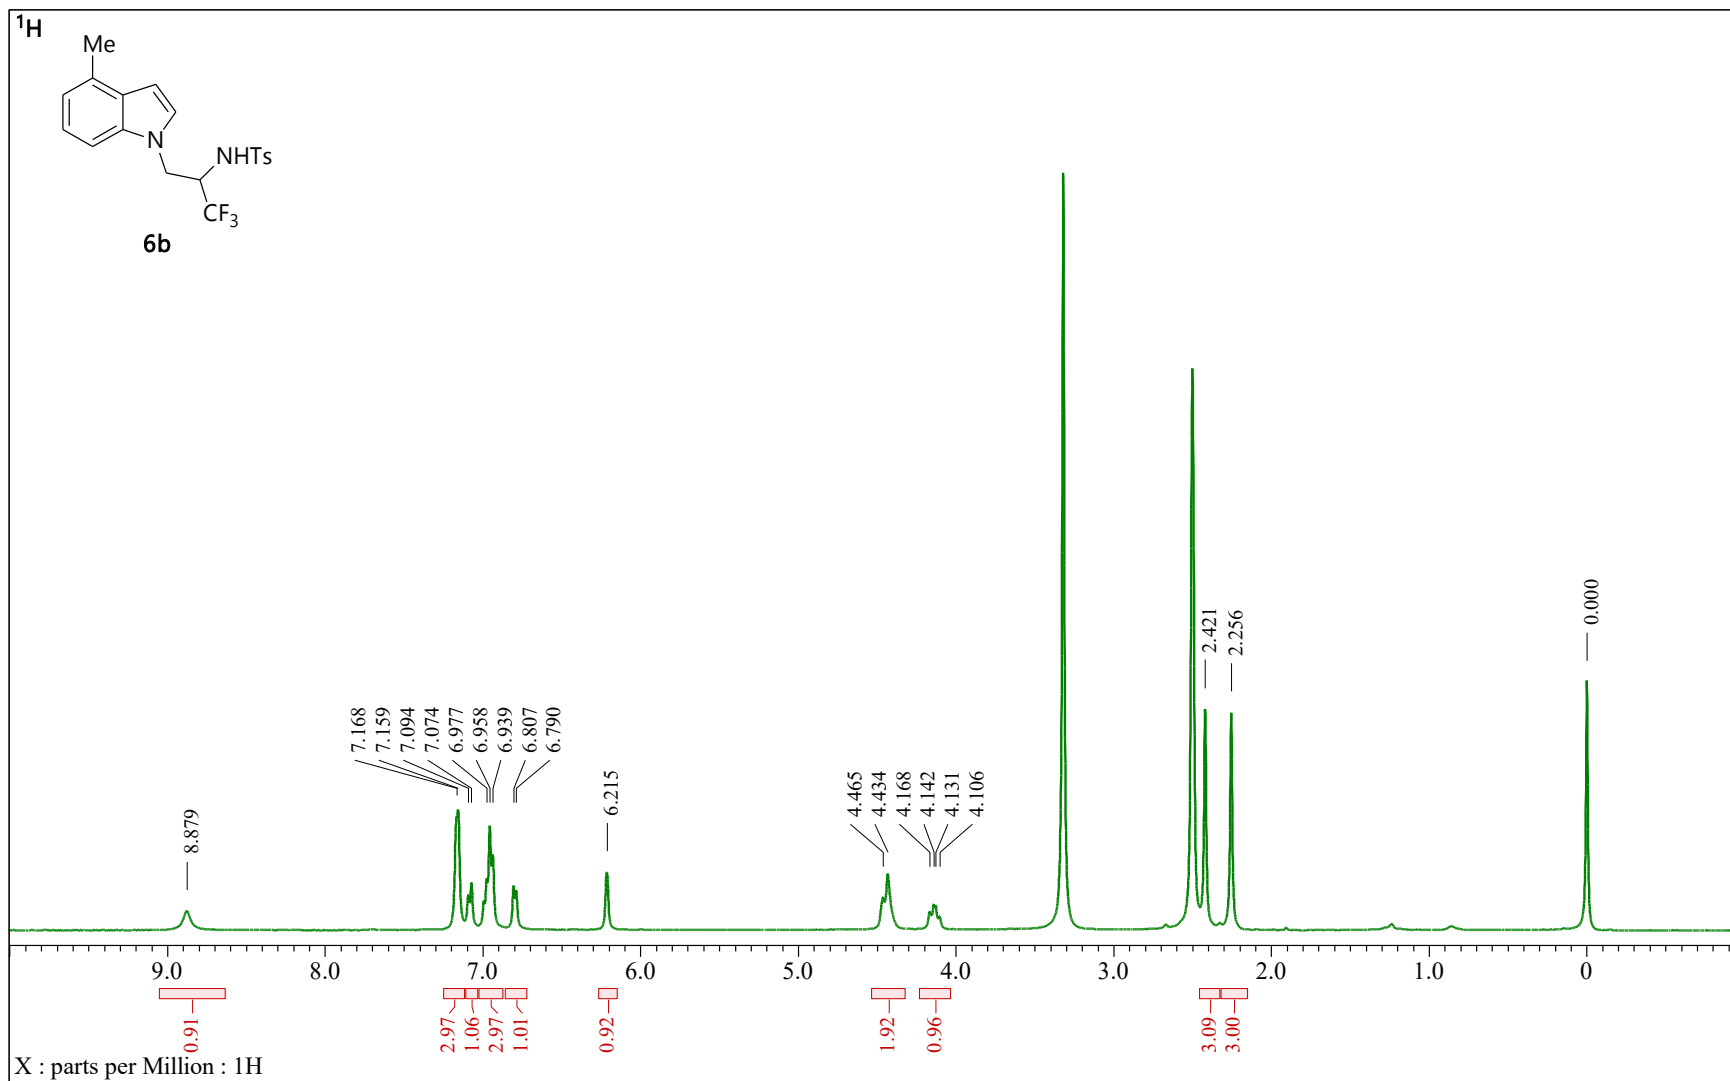

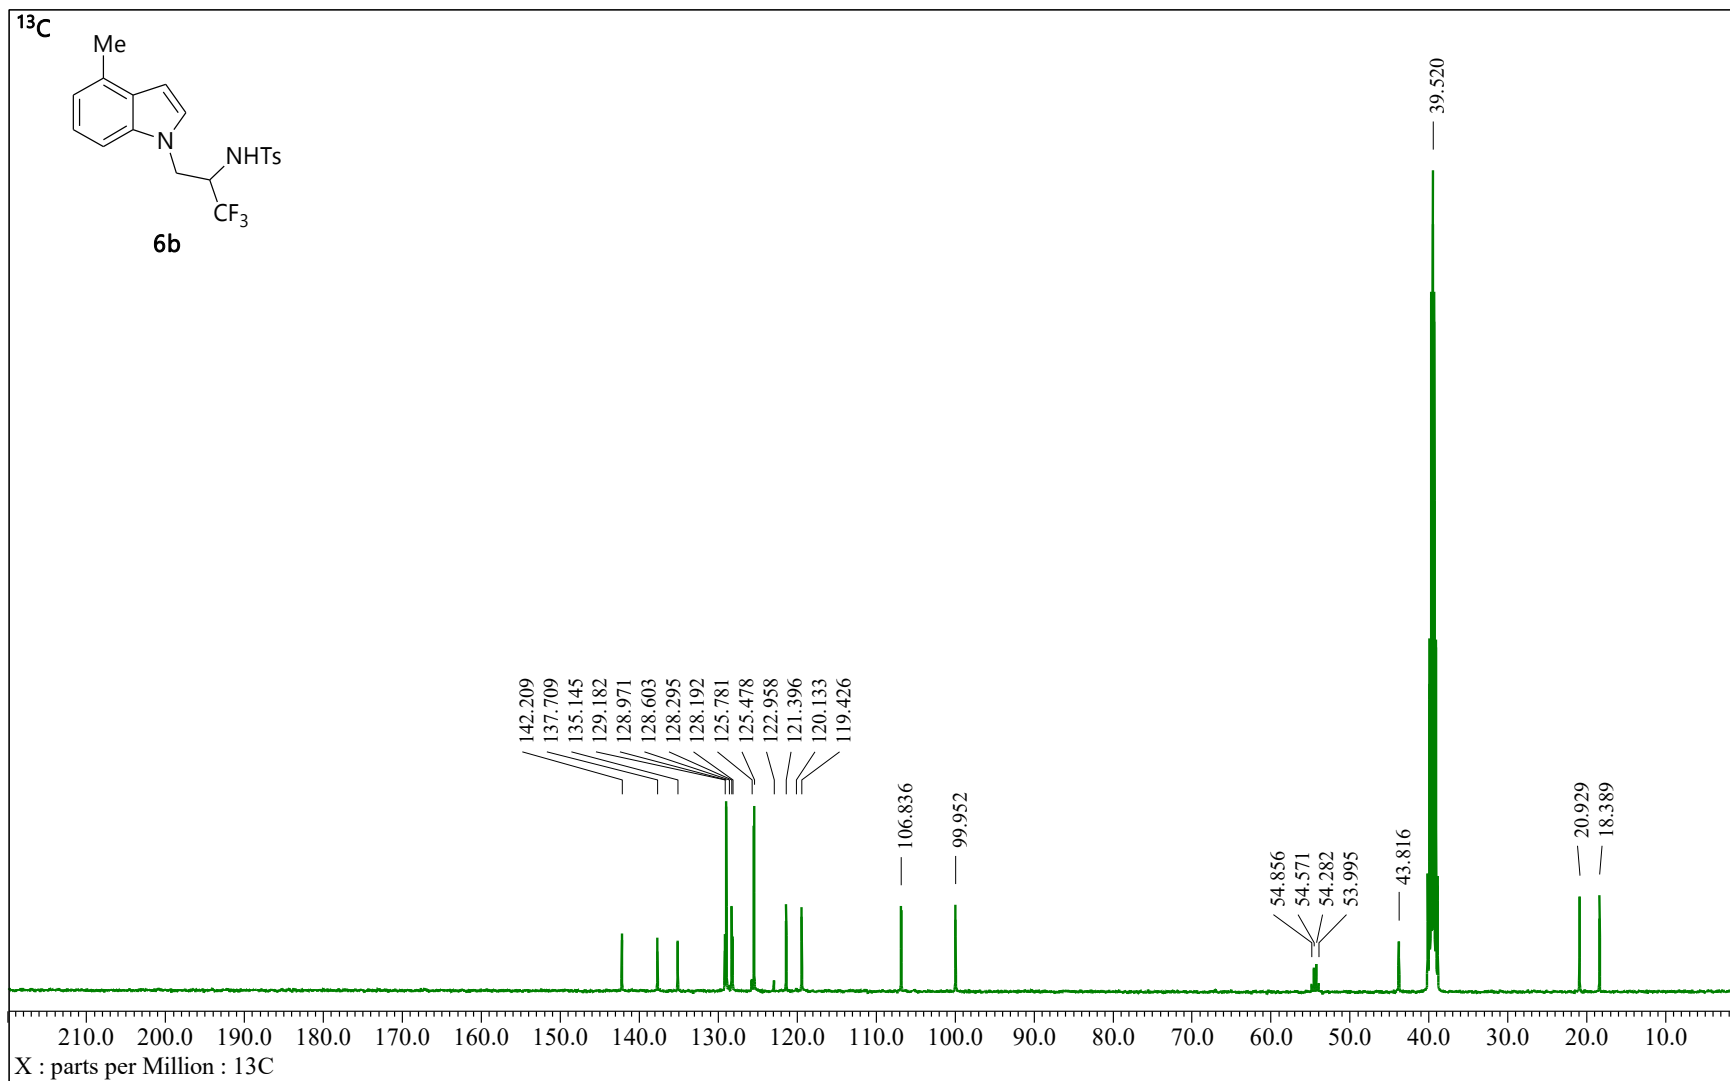

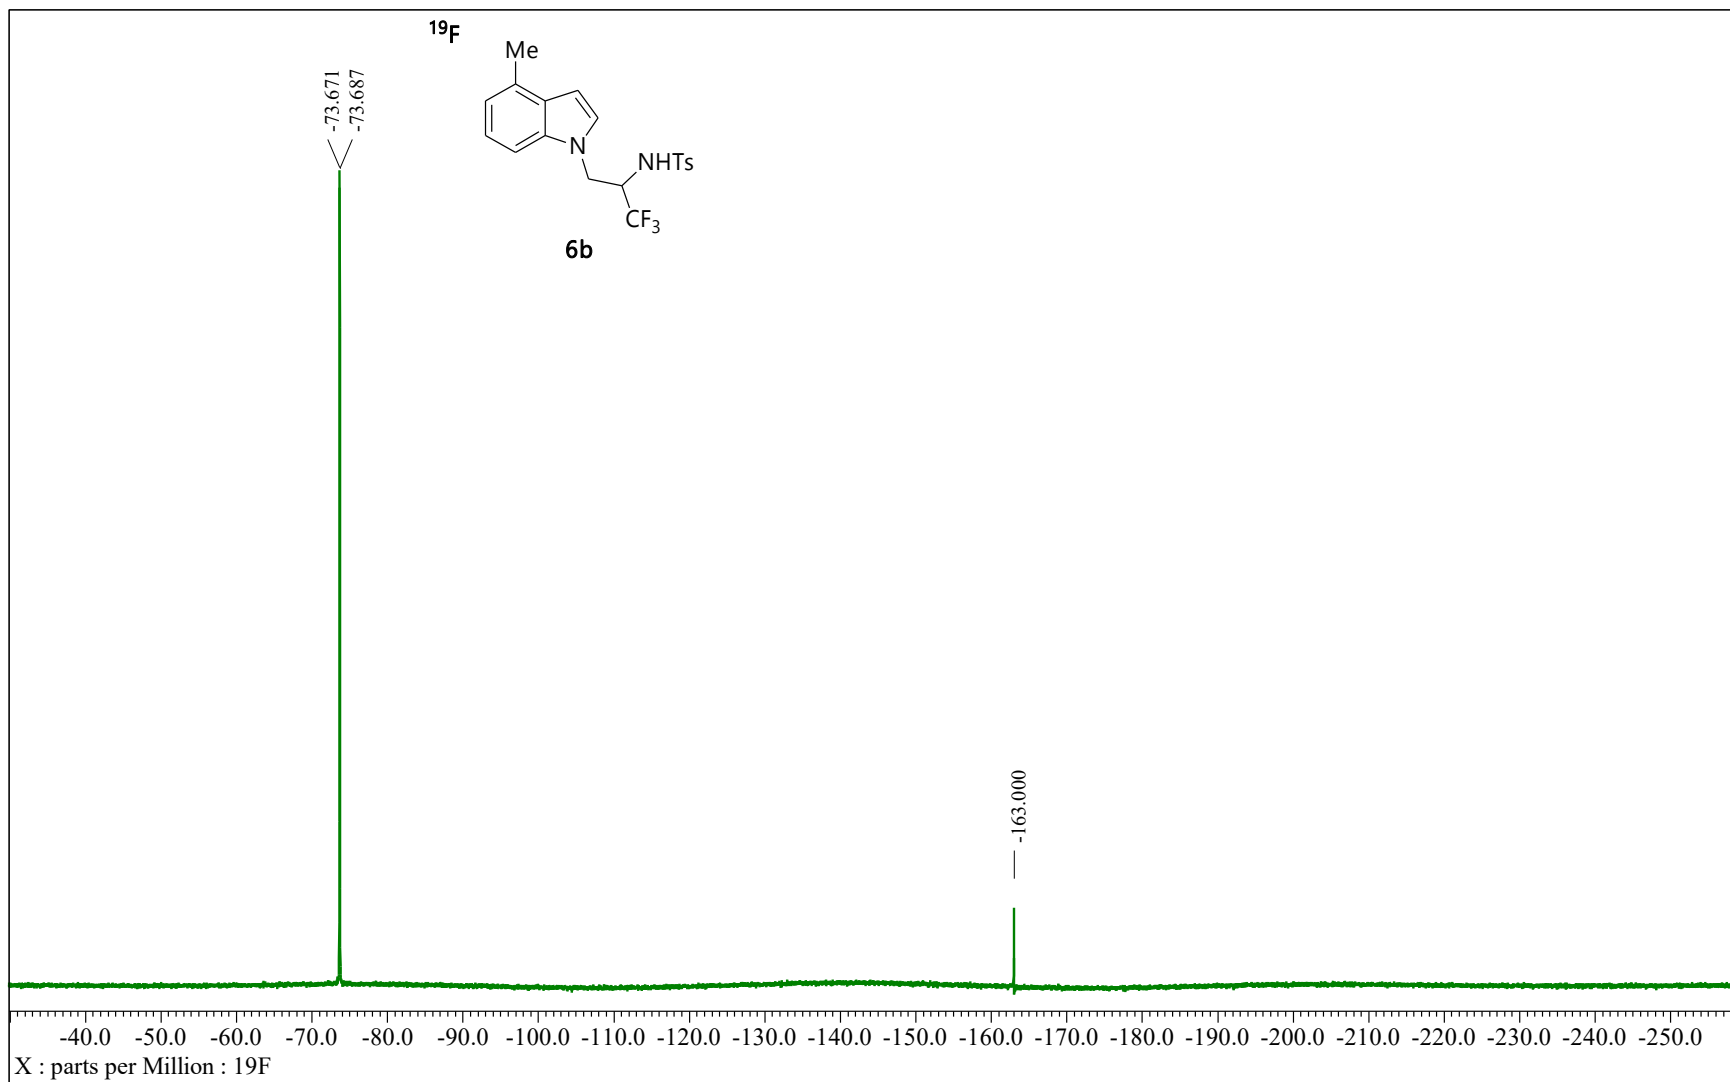

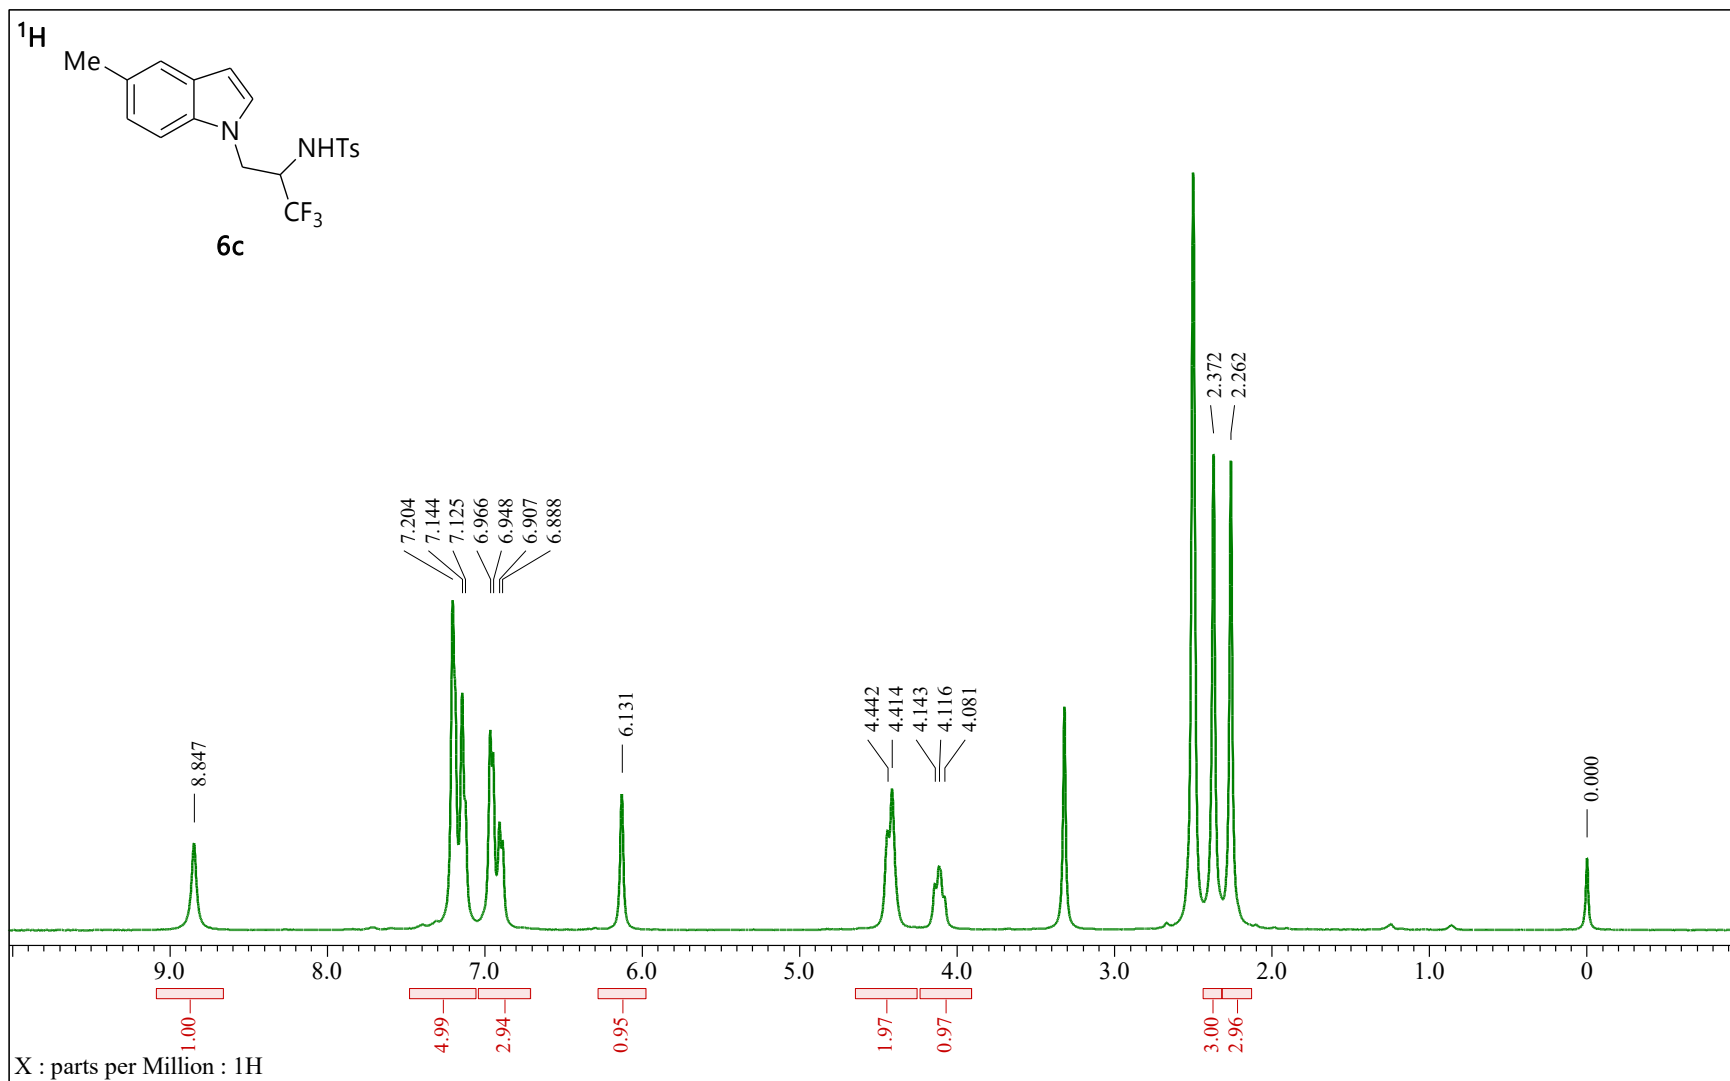

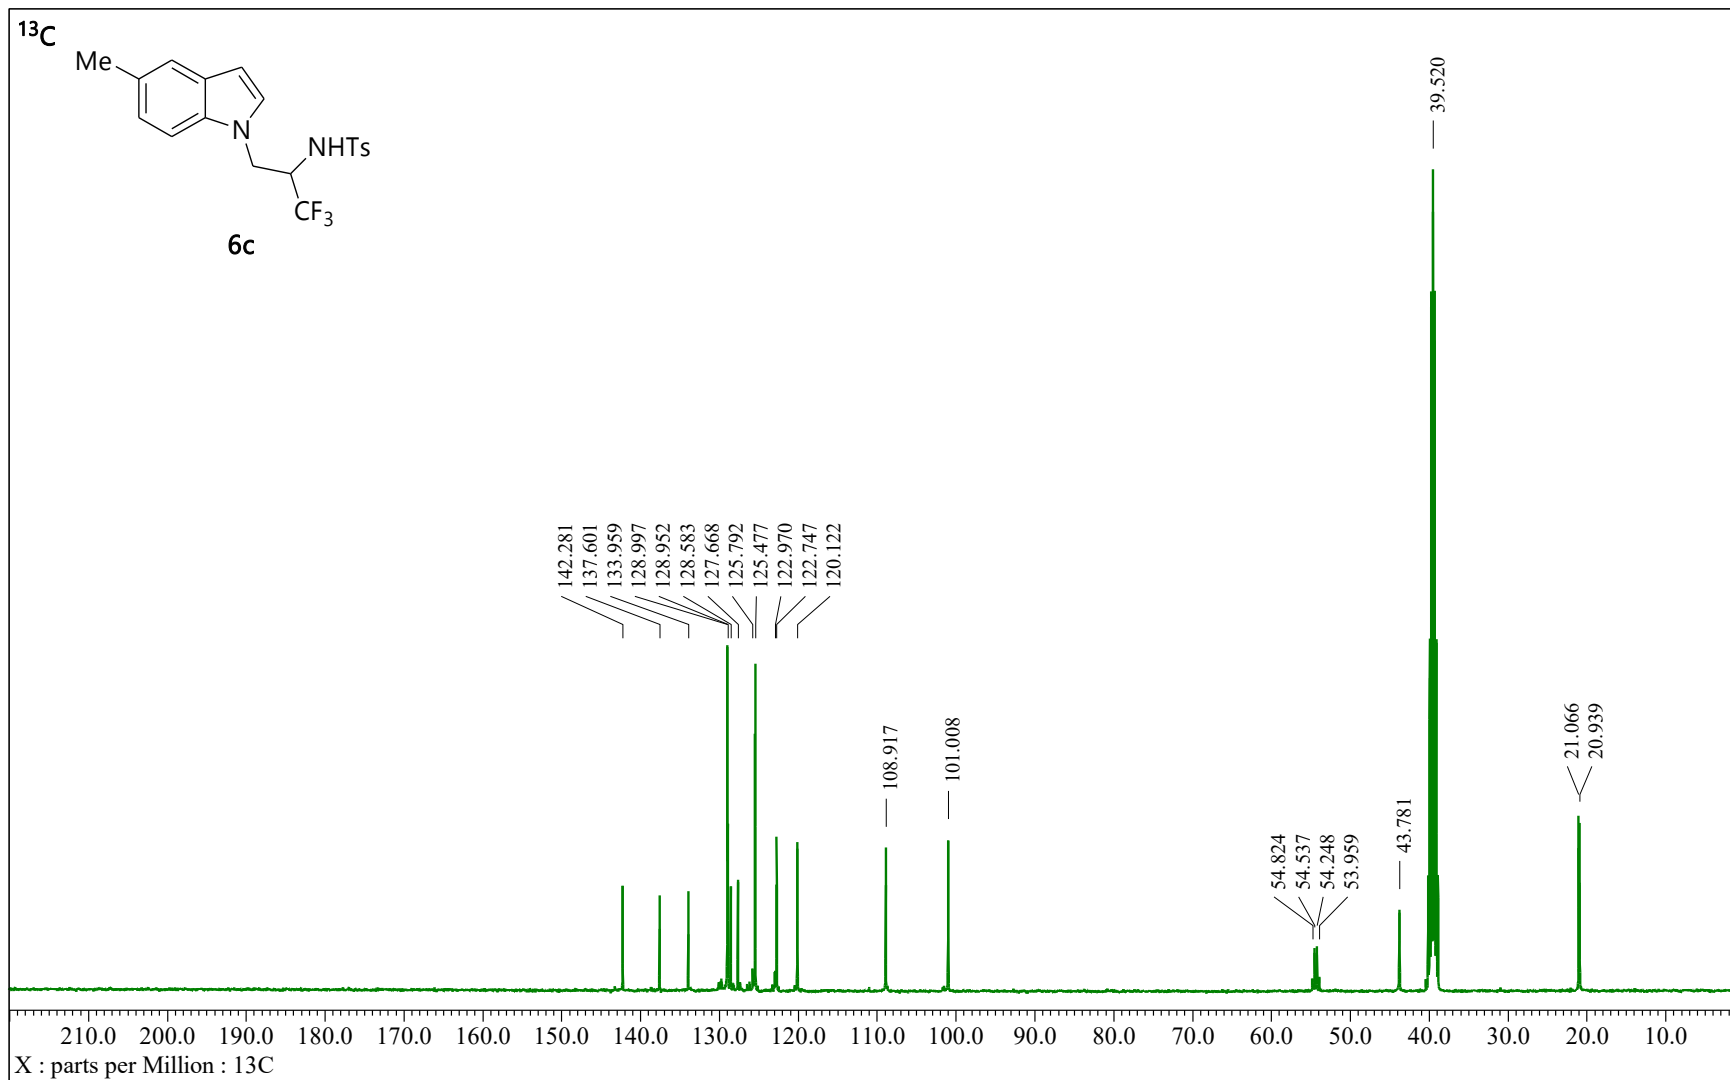

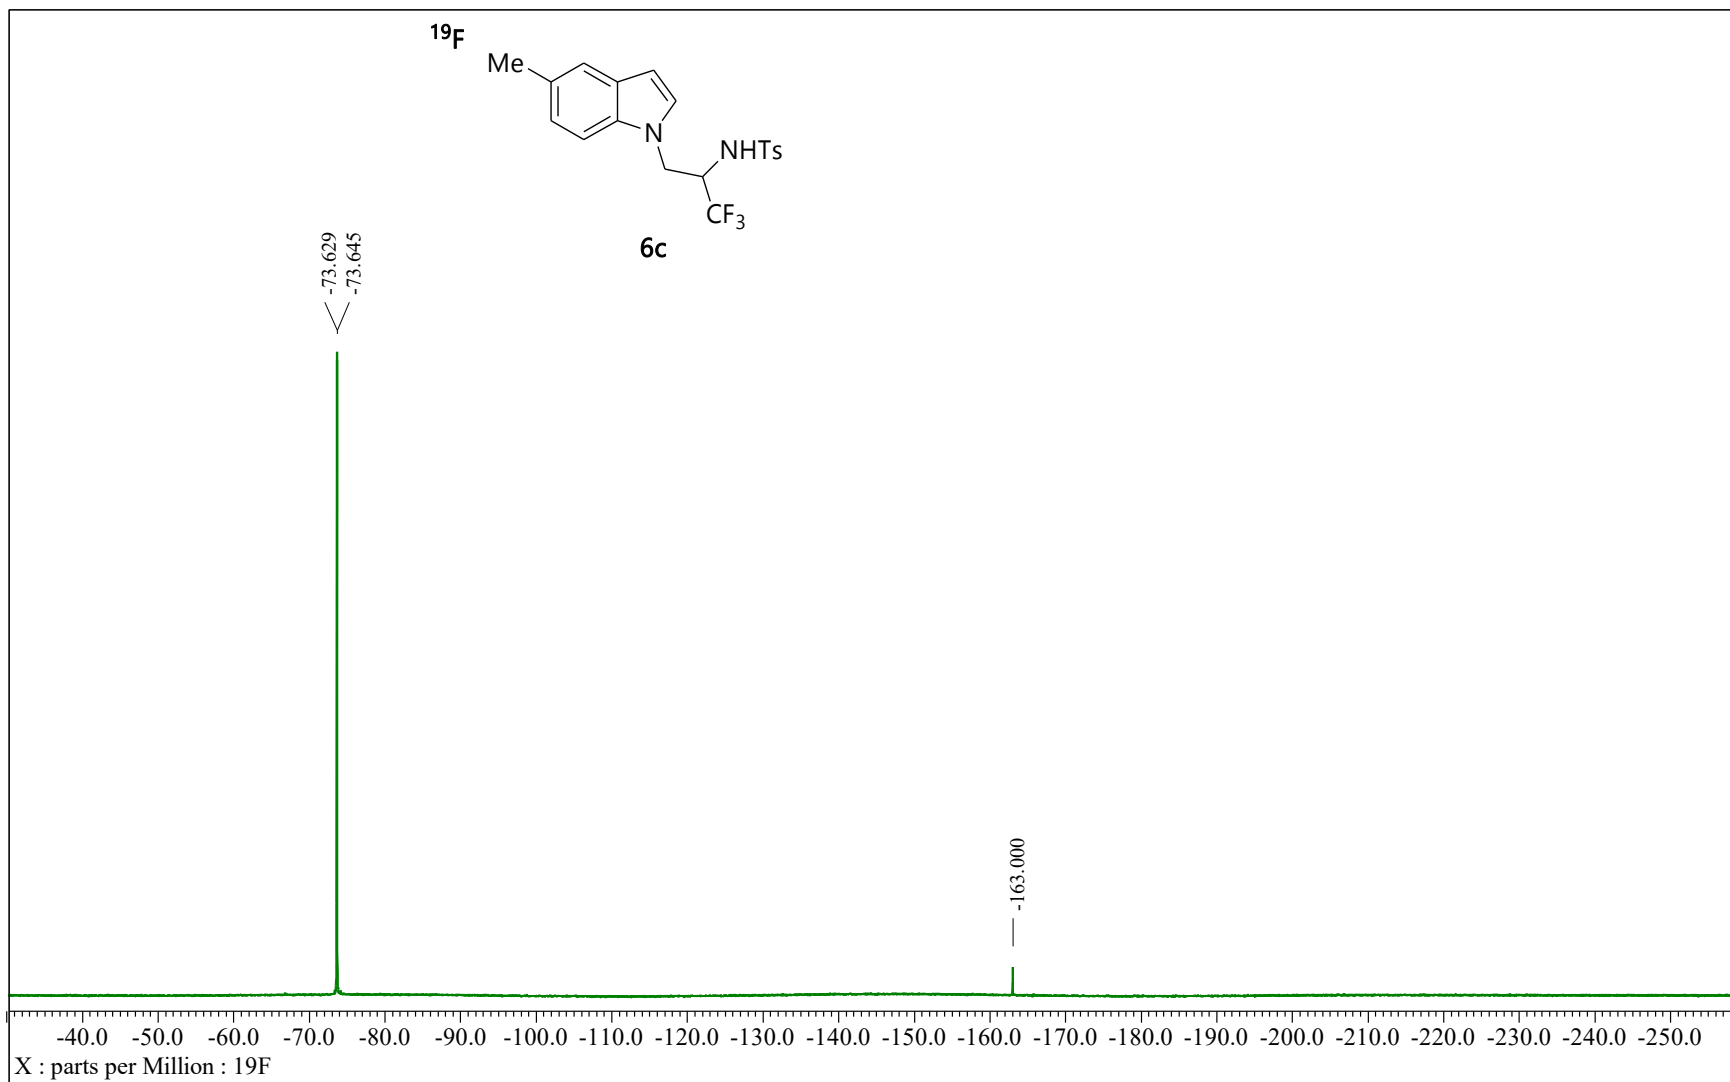

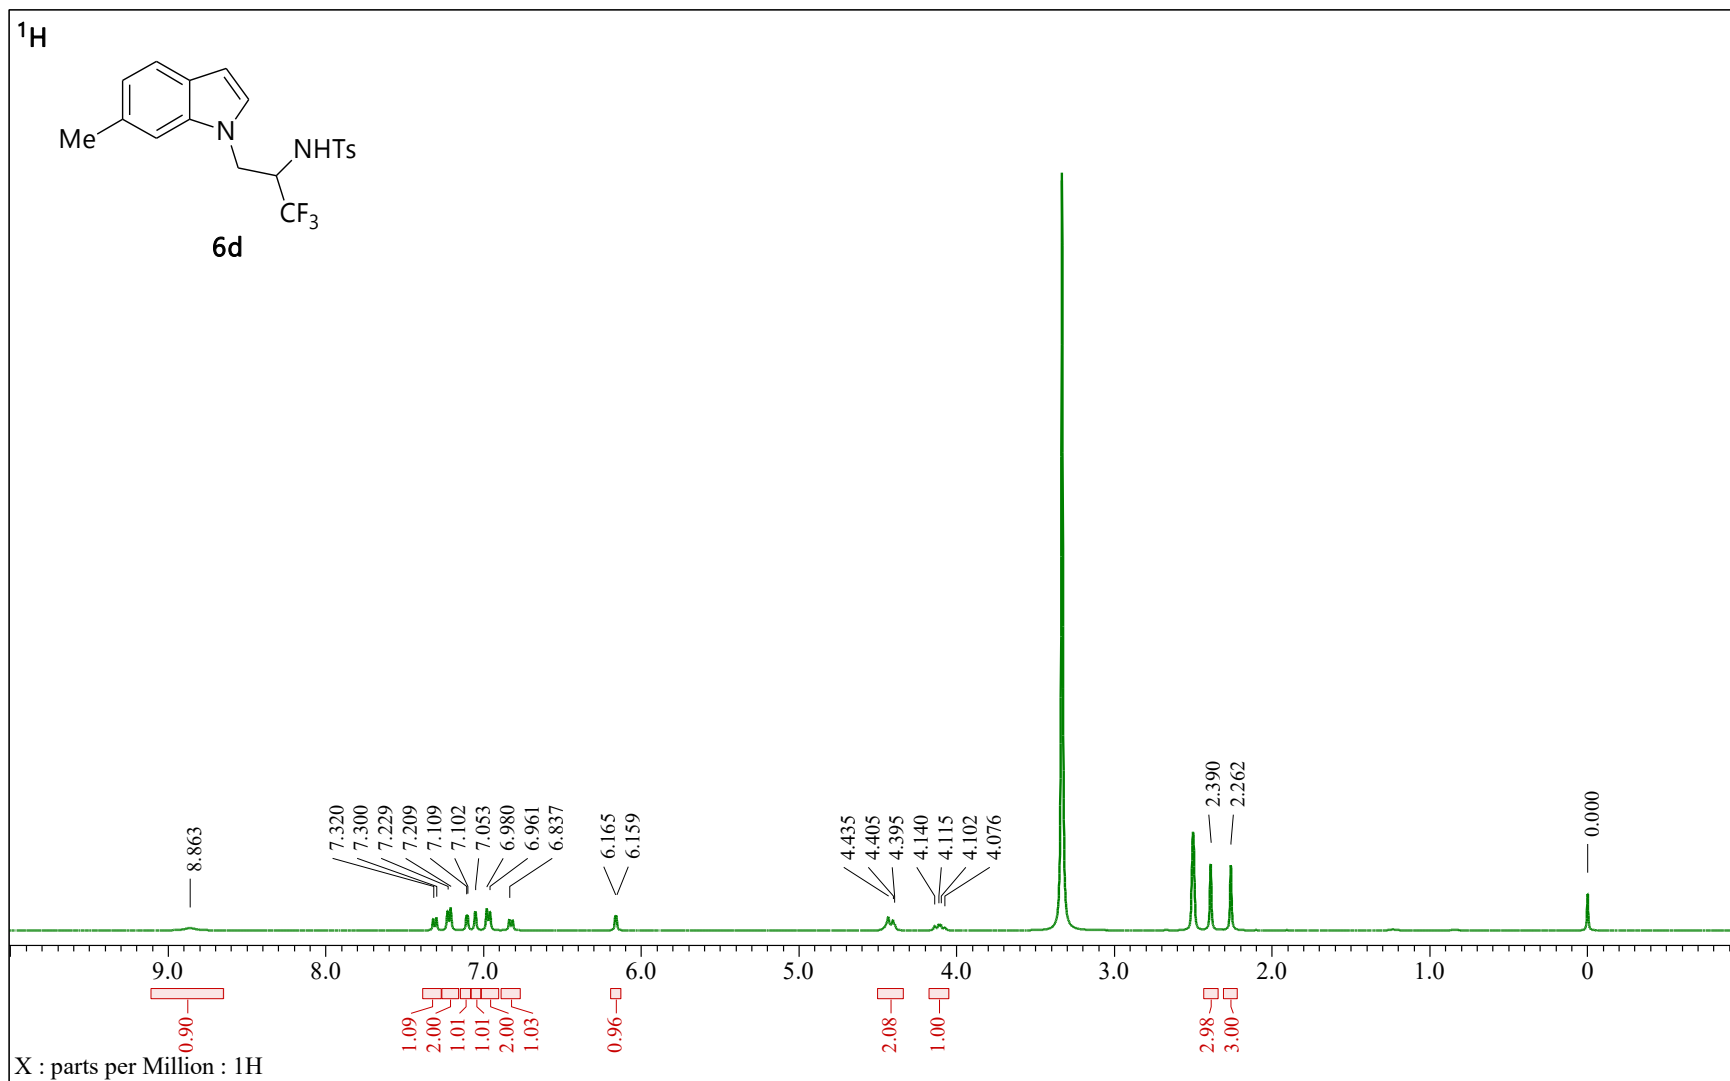

<sup>13</sup>C

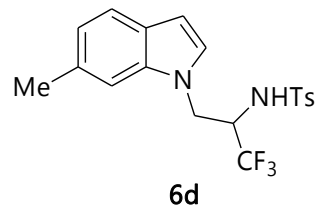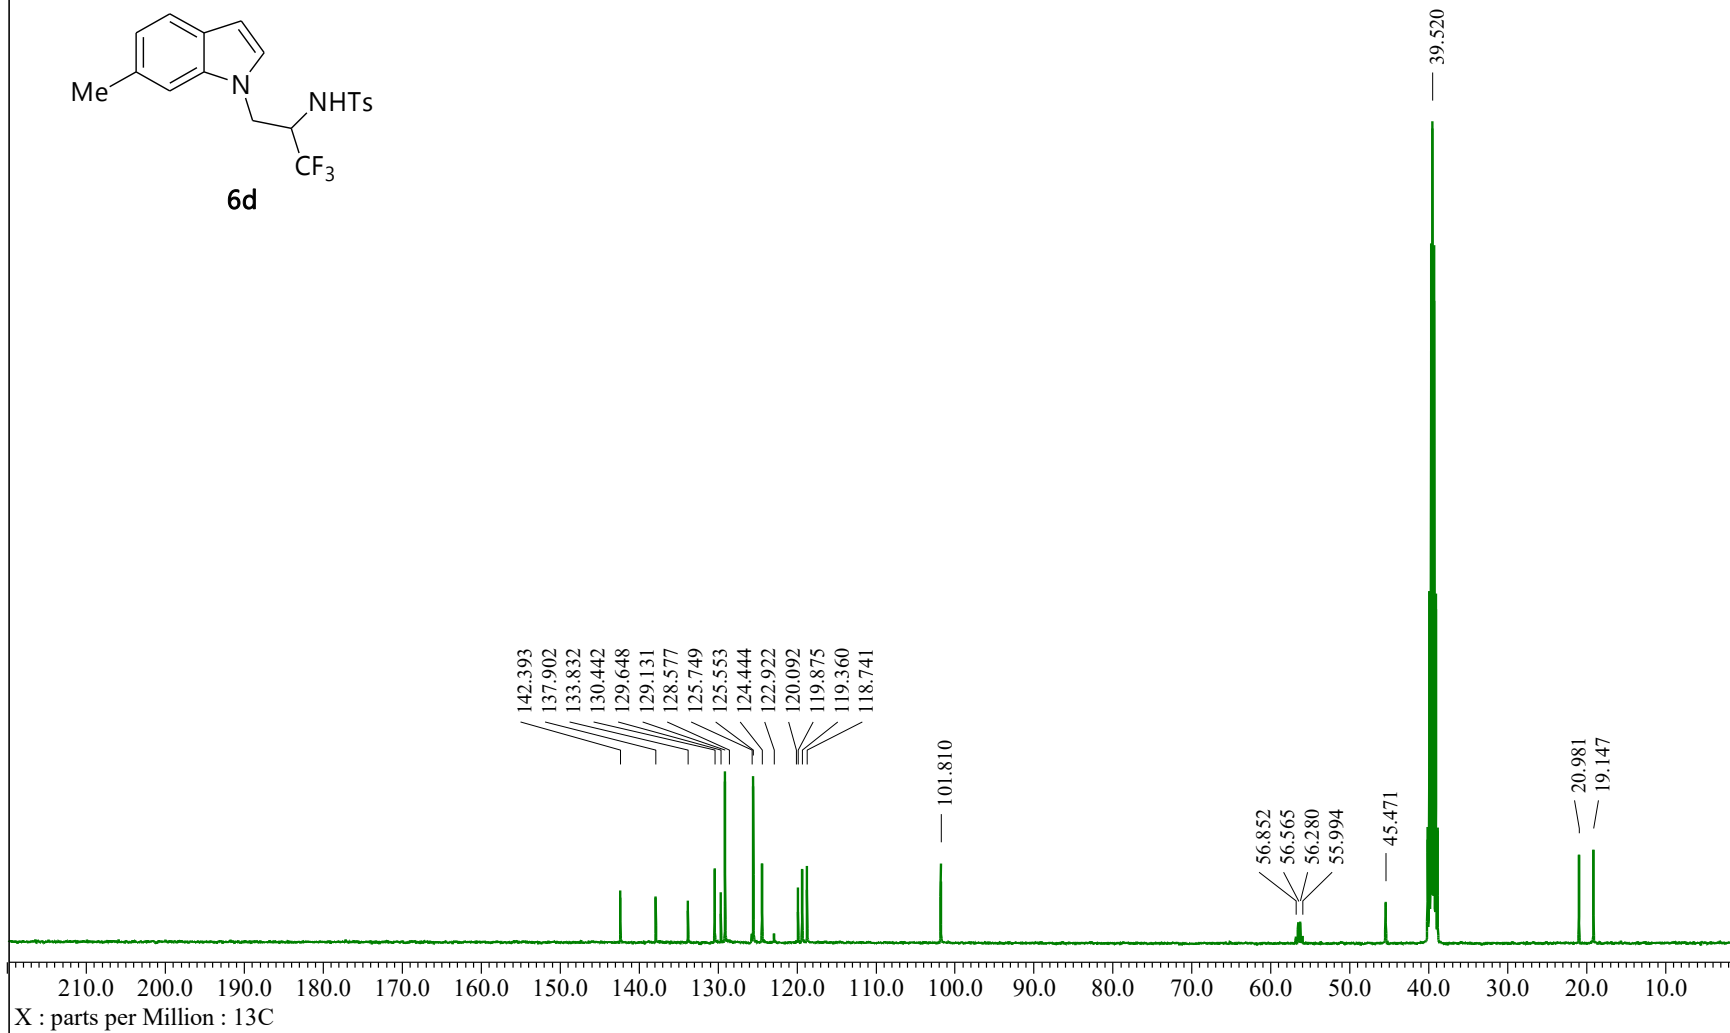



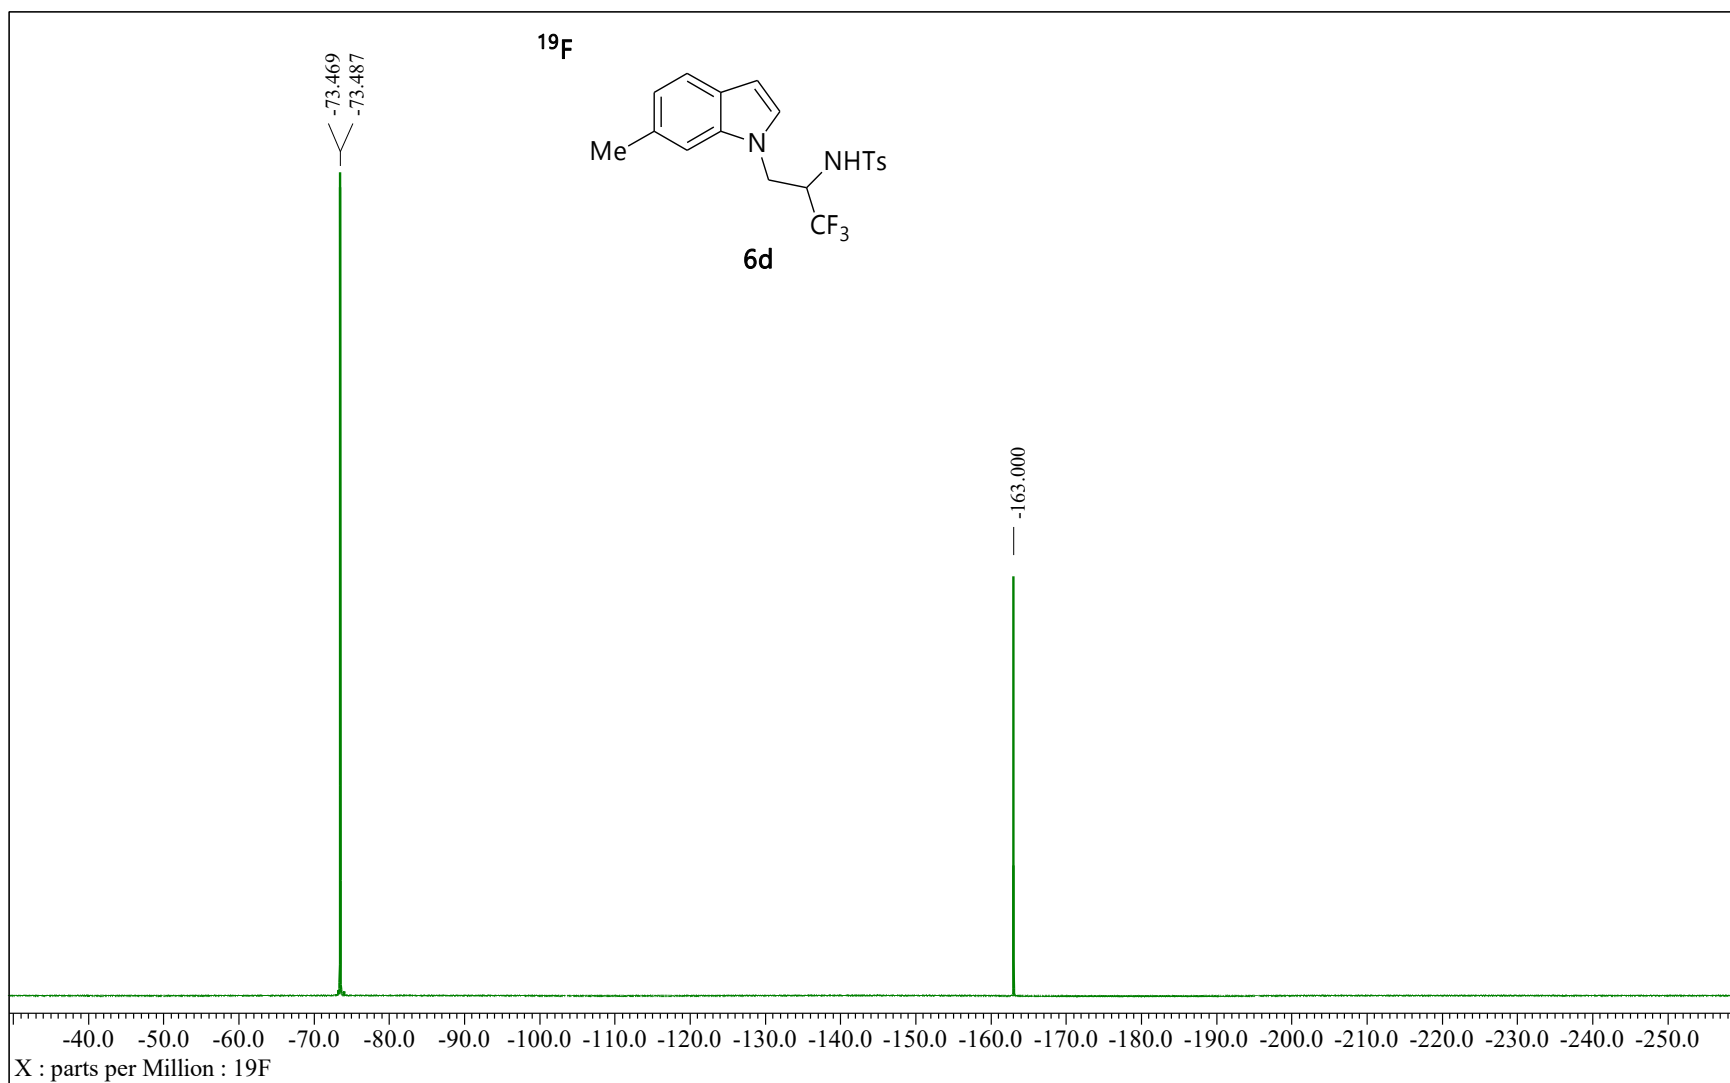

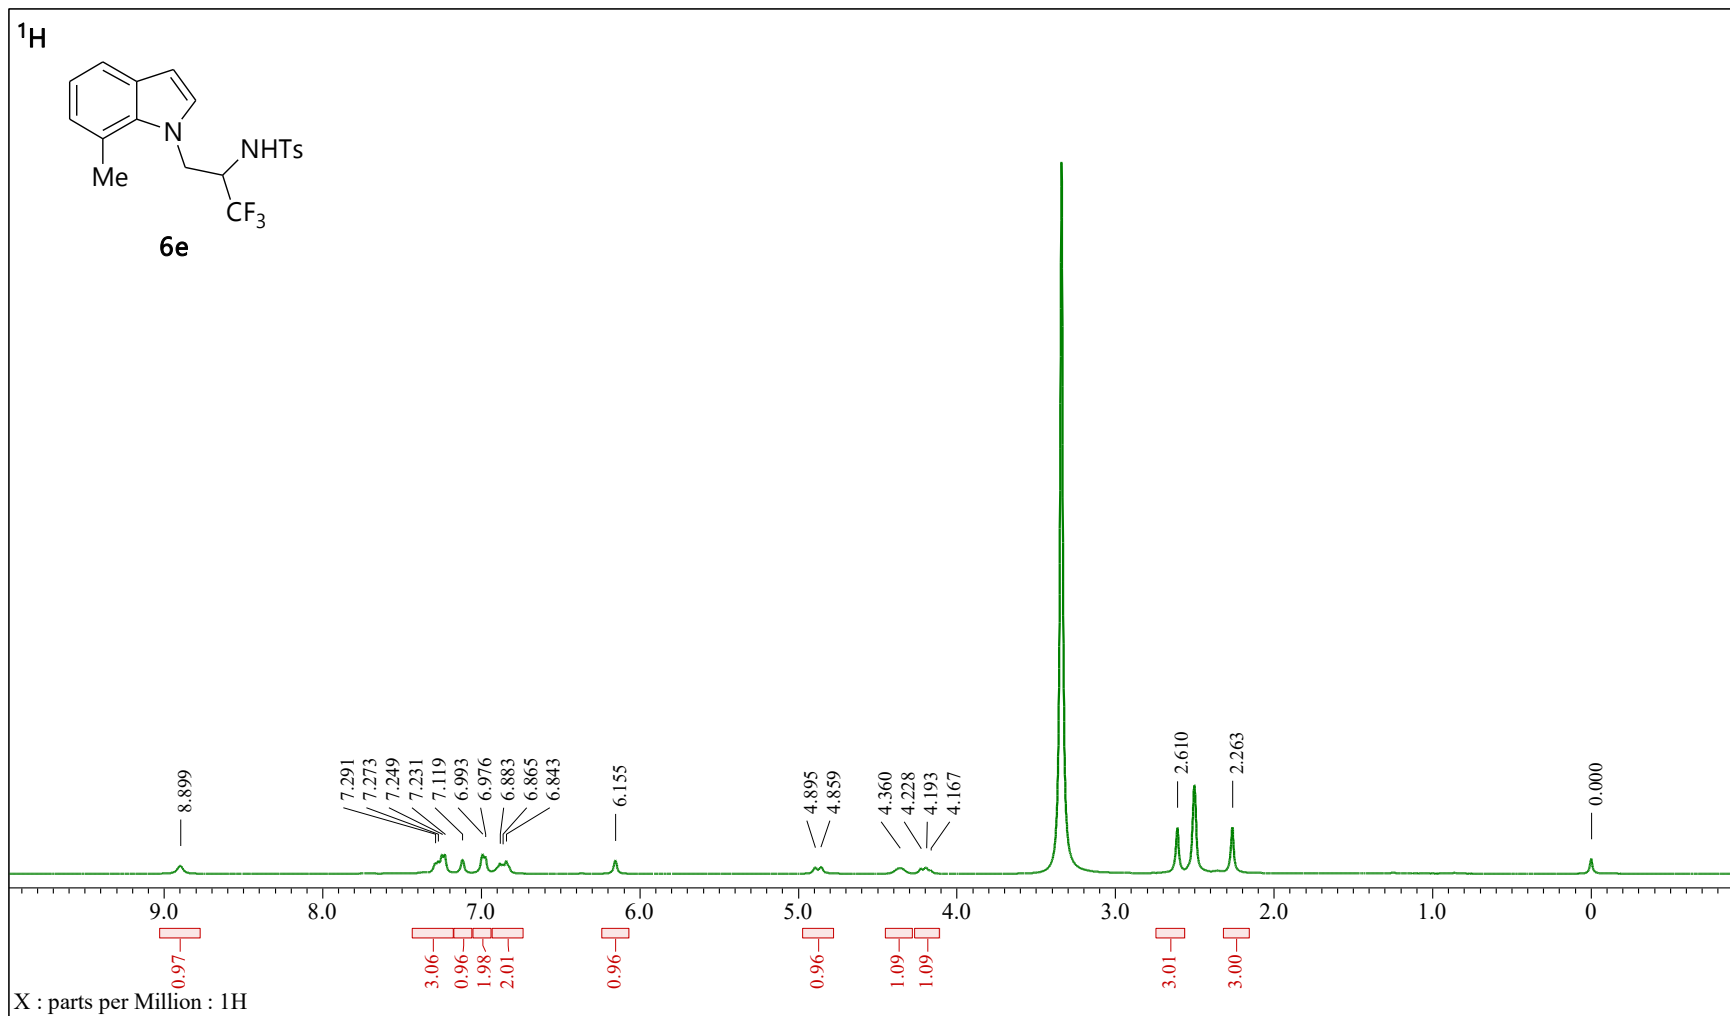

<sup>13</sup>C

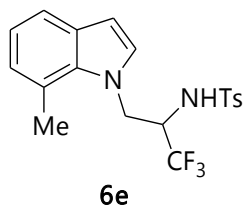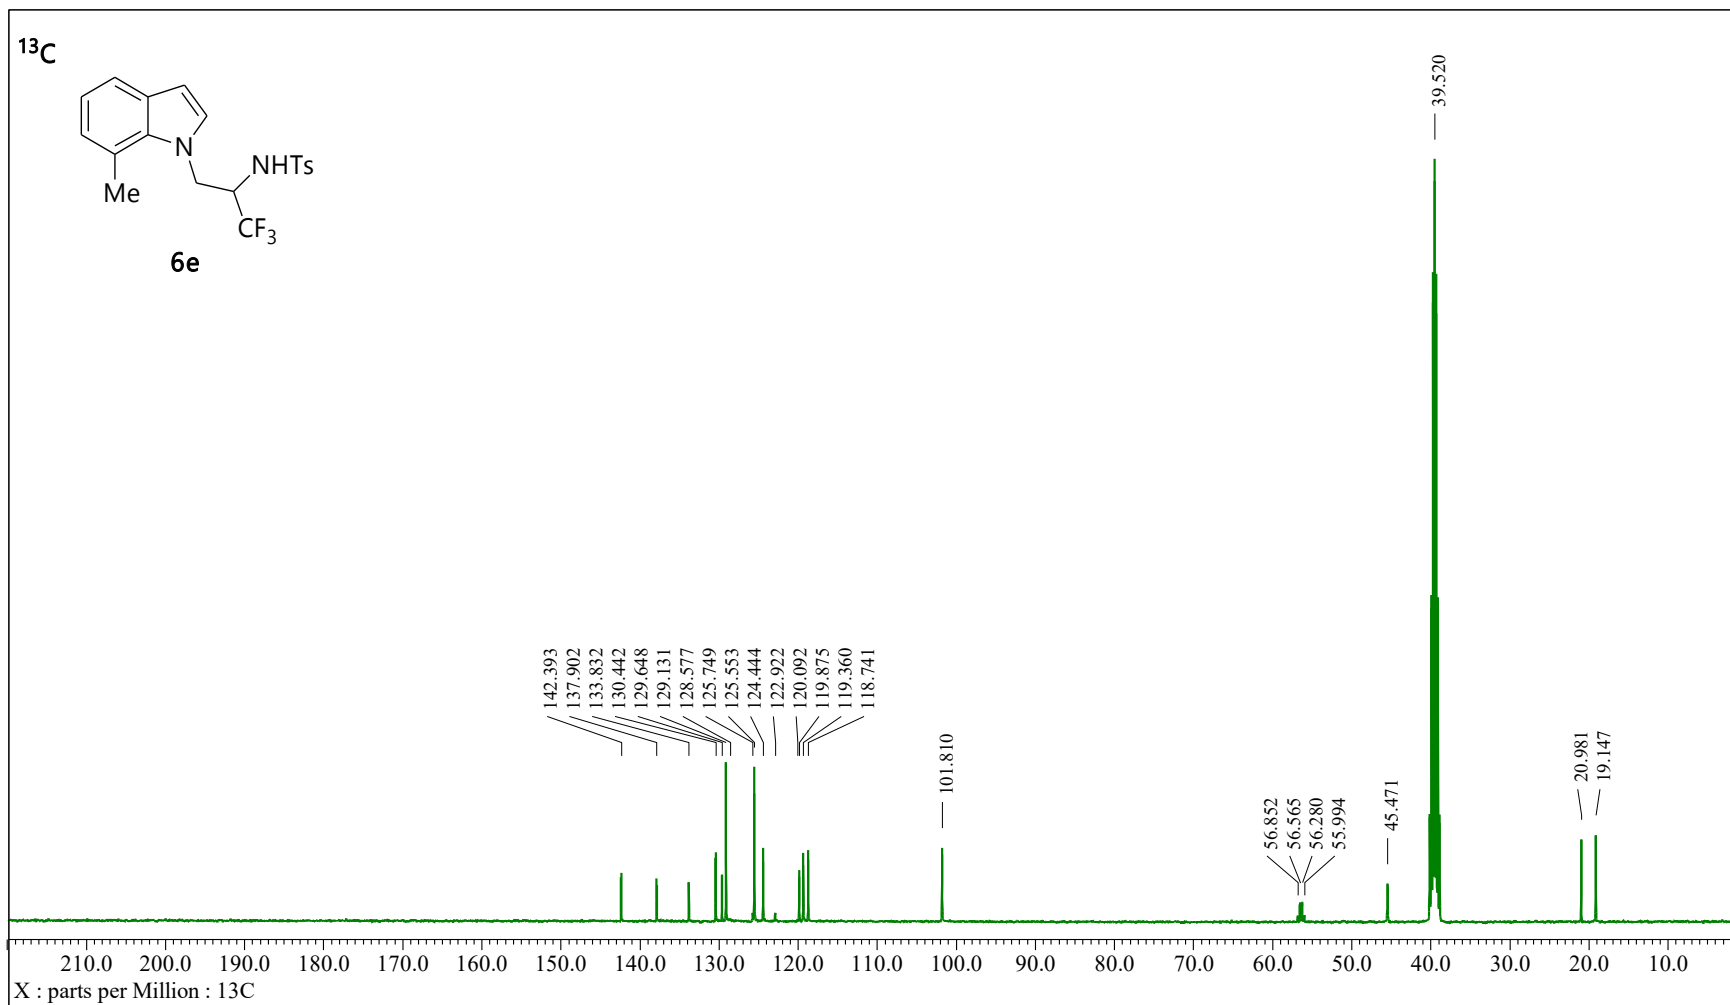

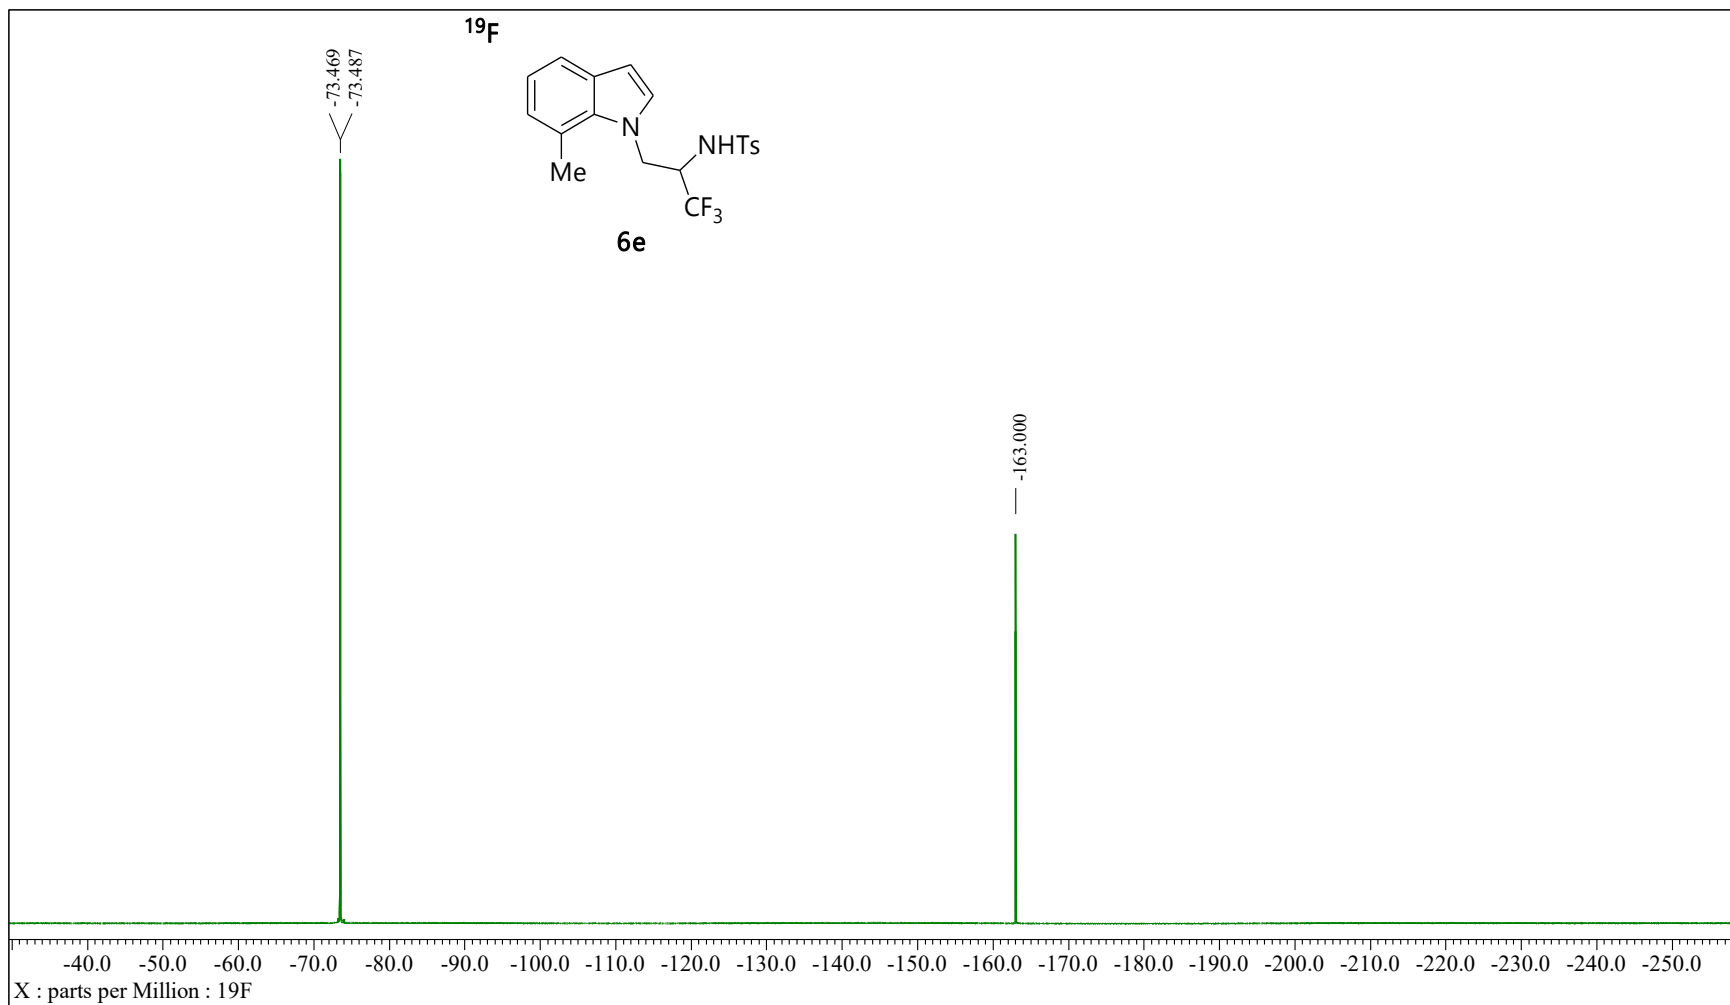

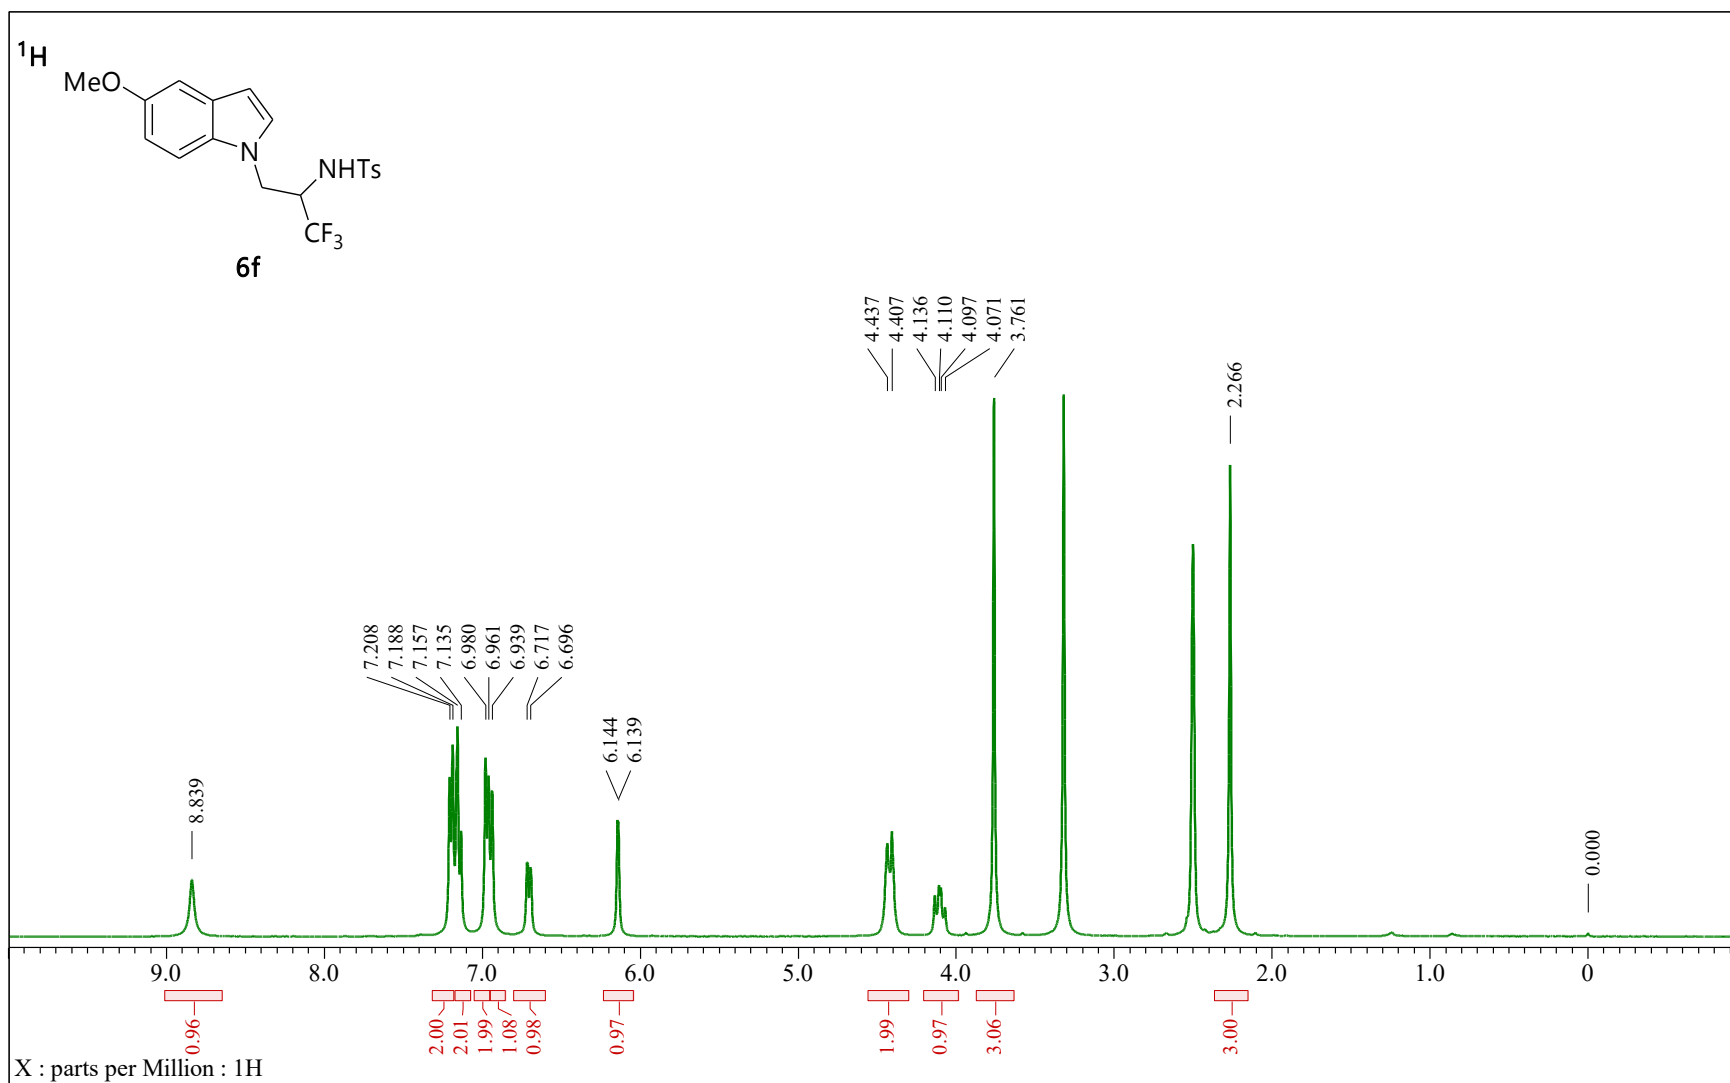

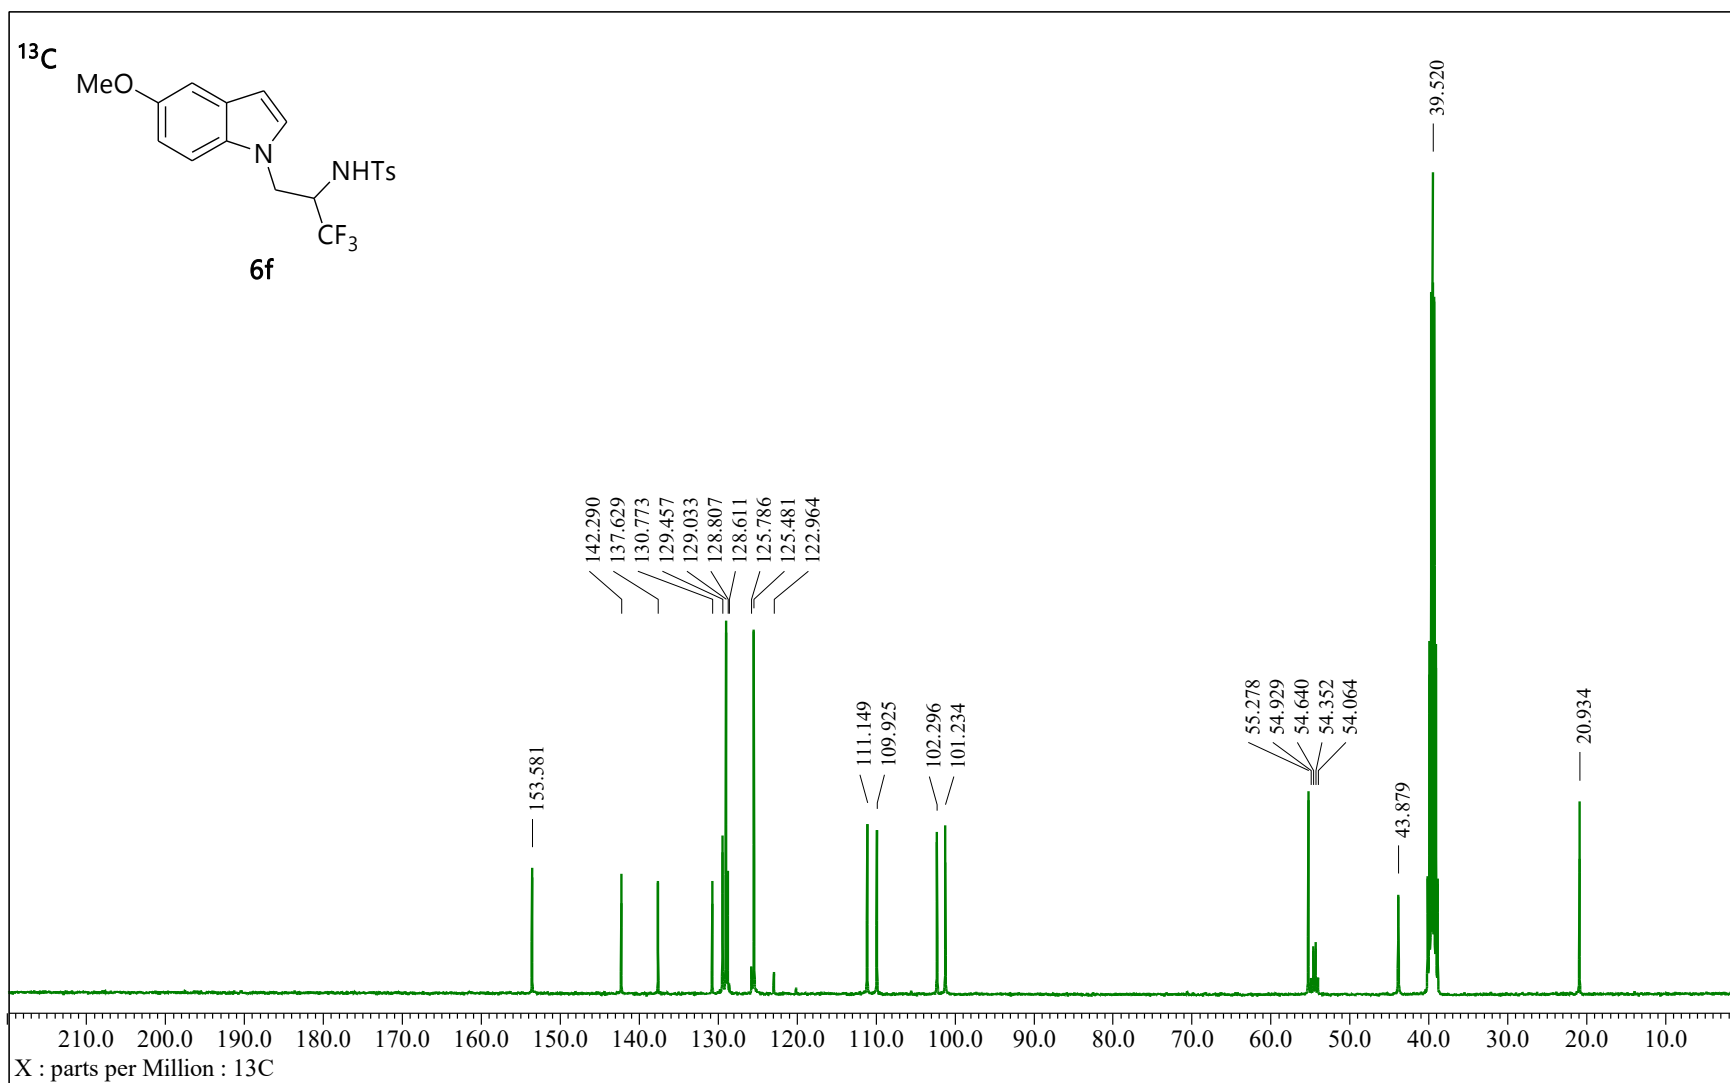

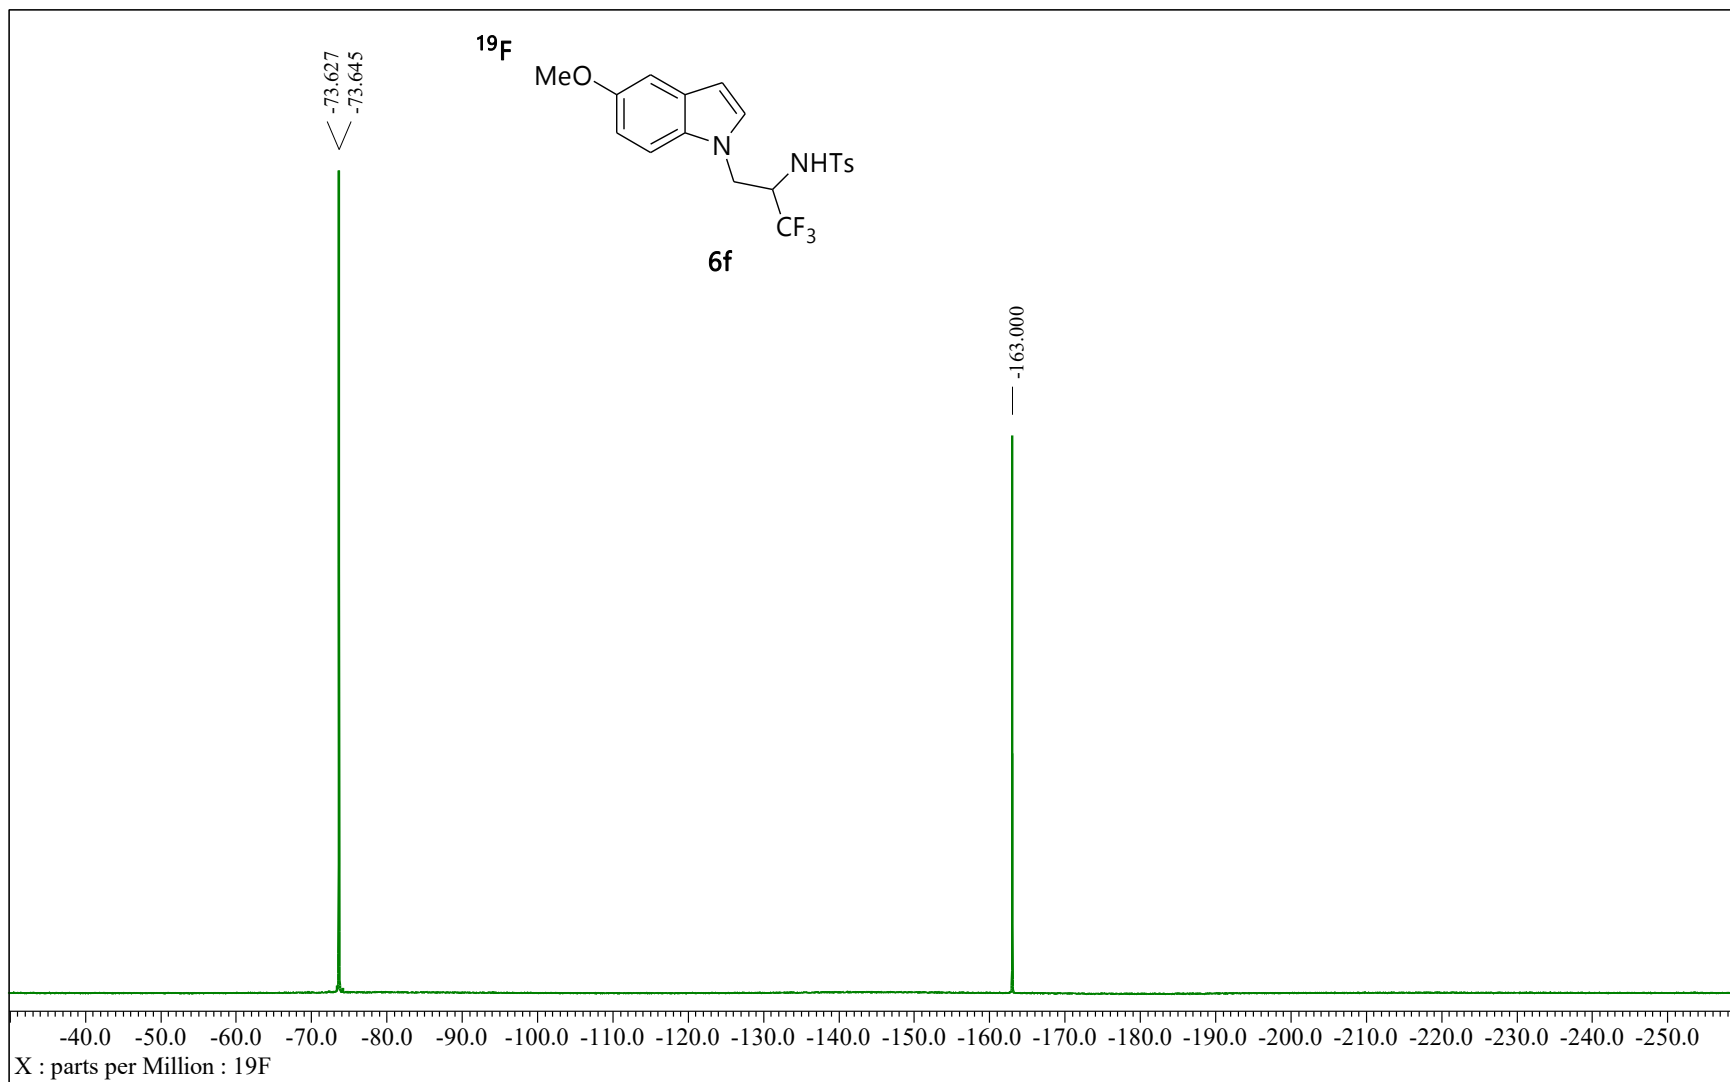

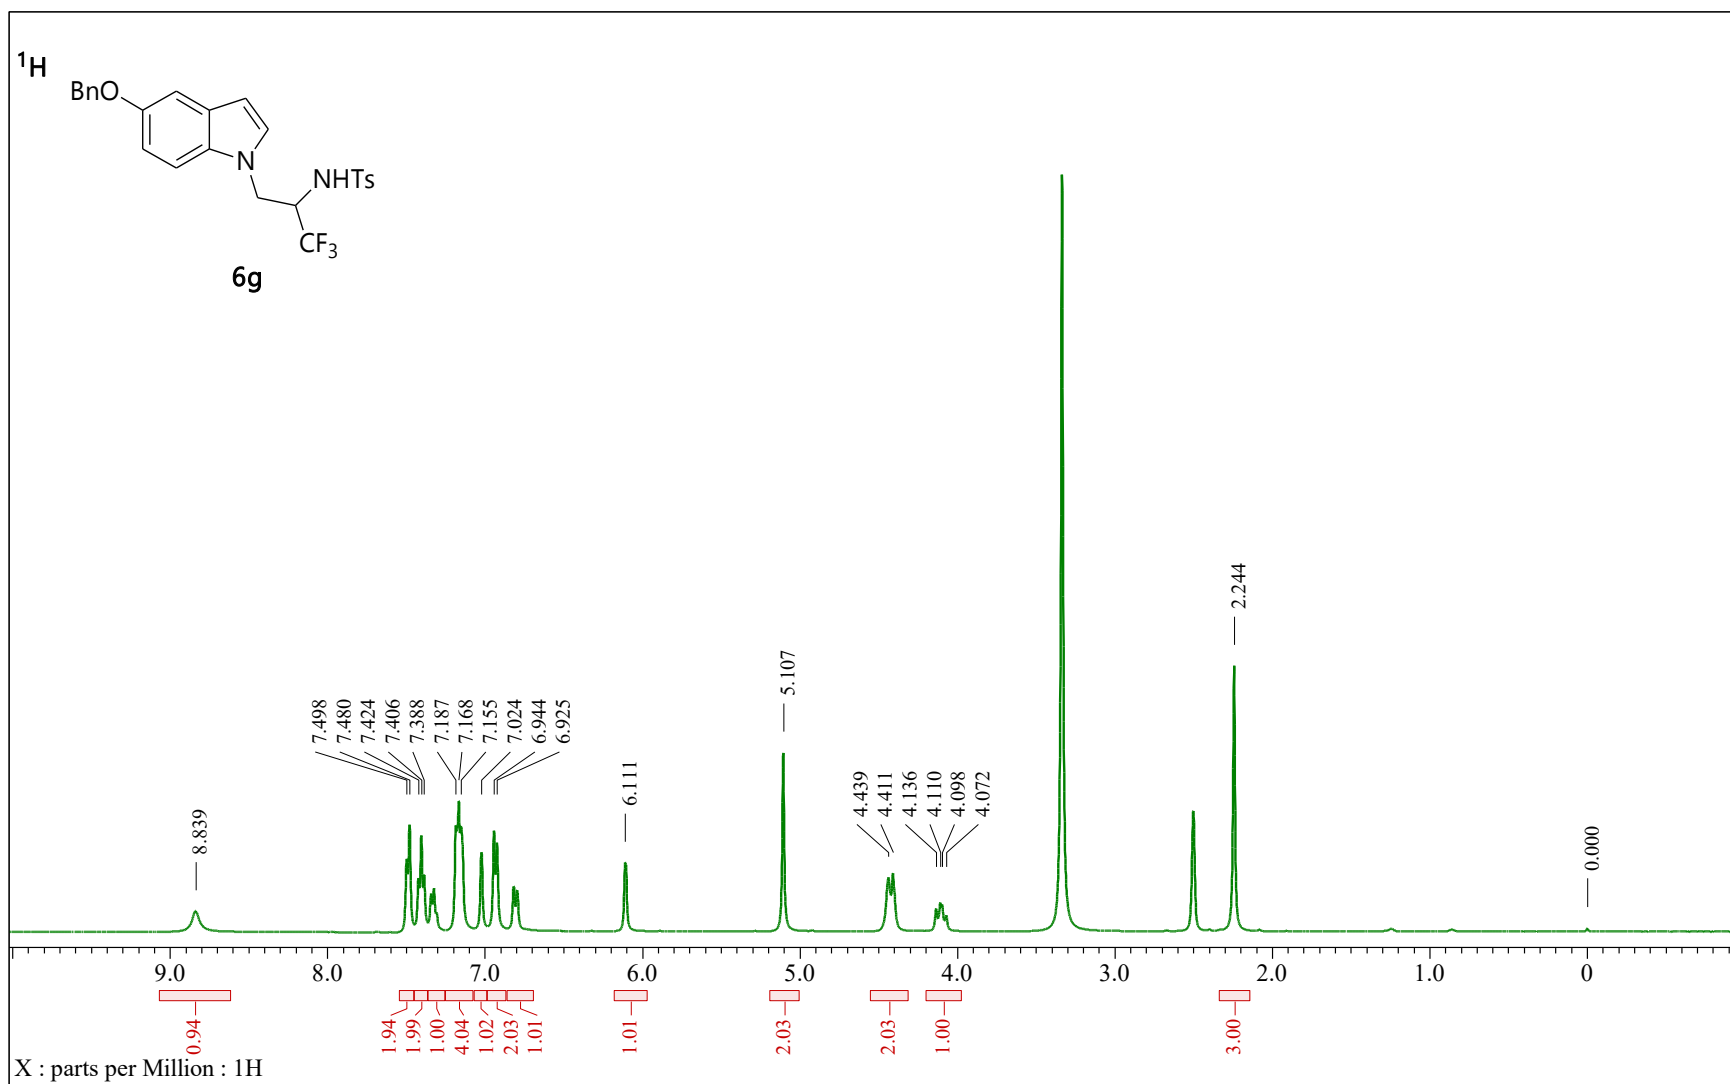



<sup>13</sup>C

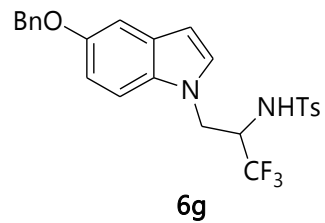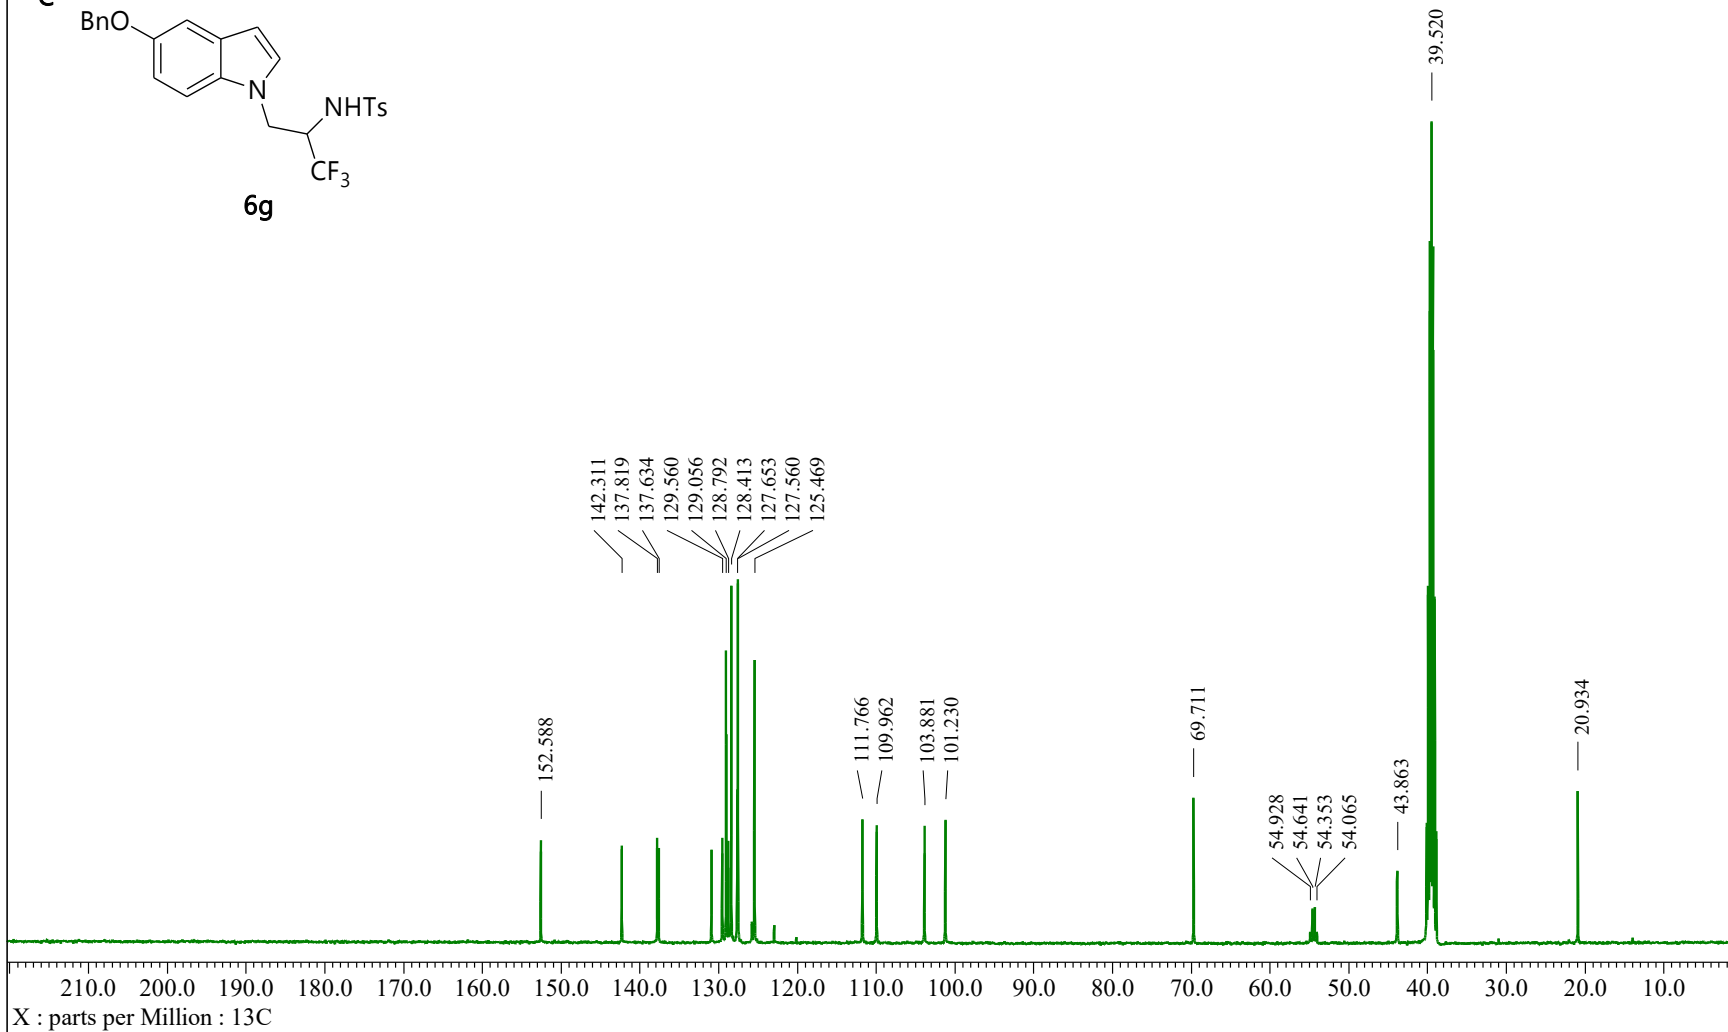

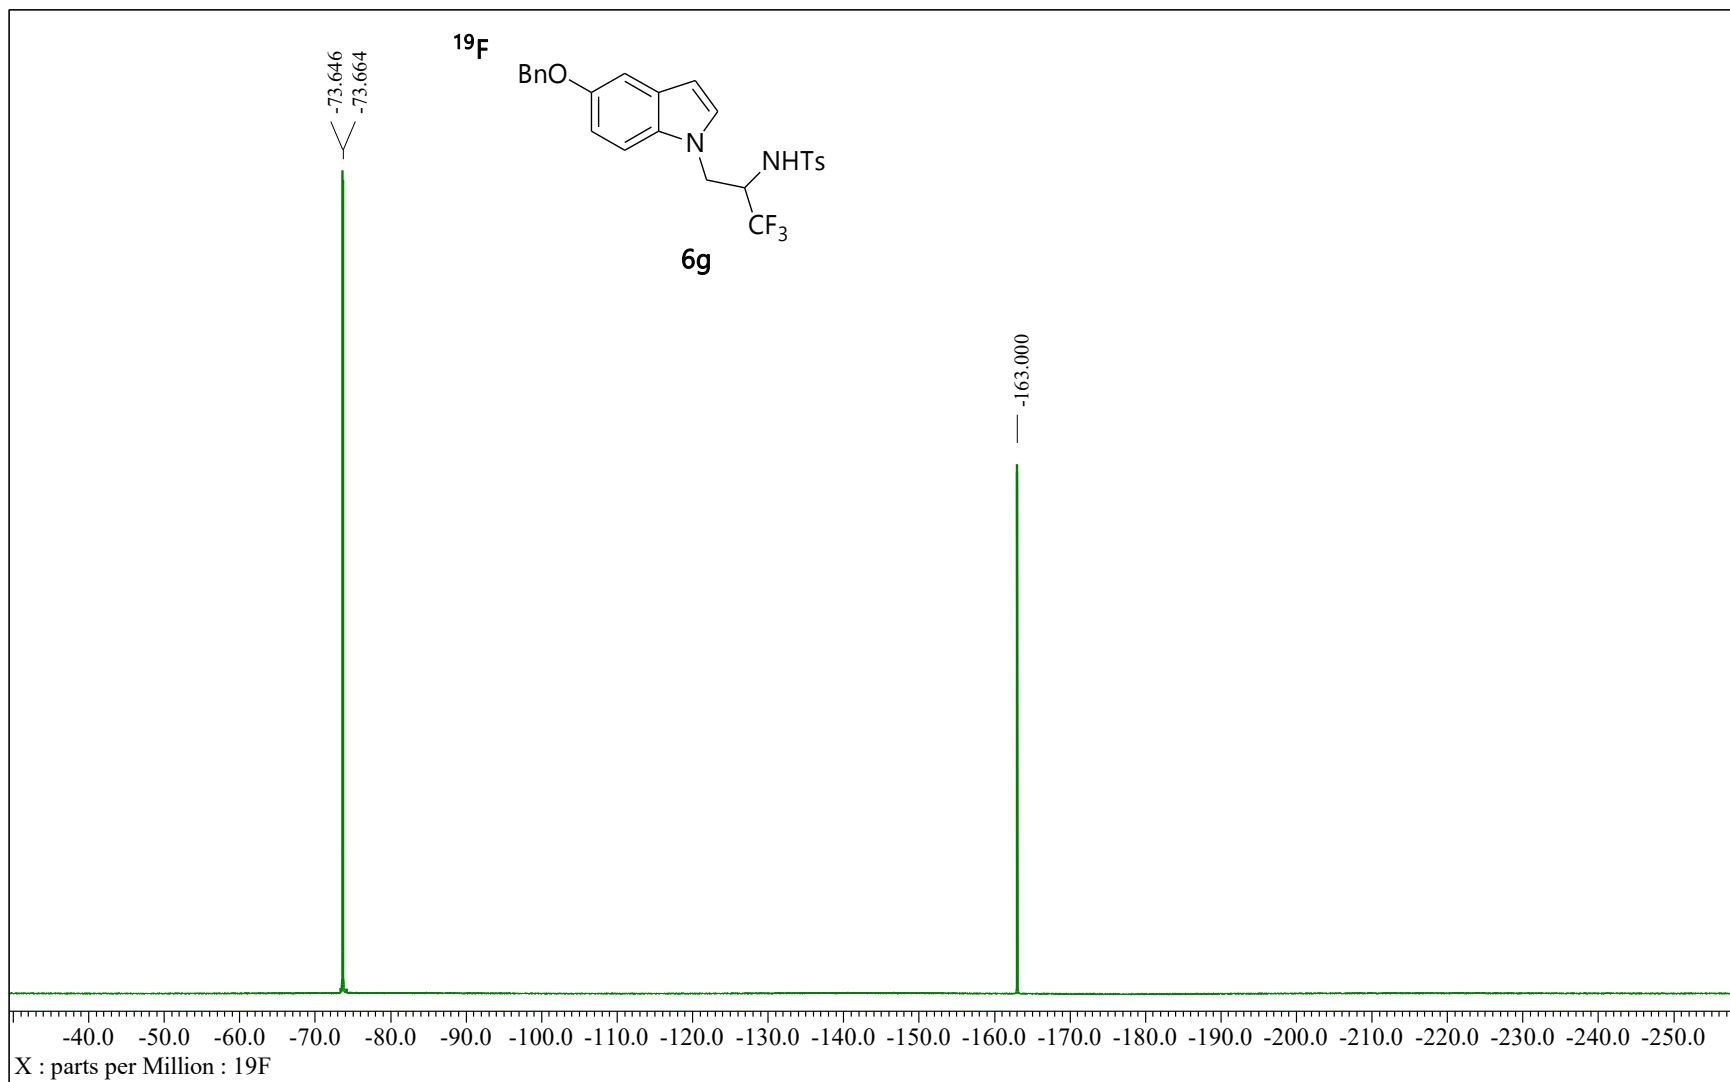

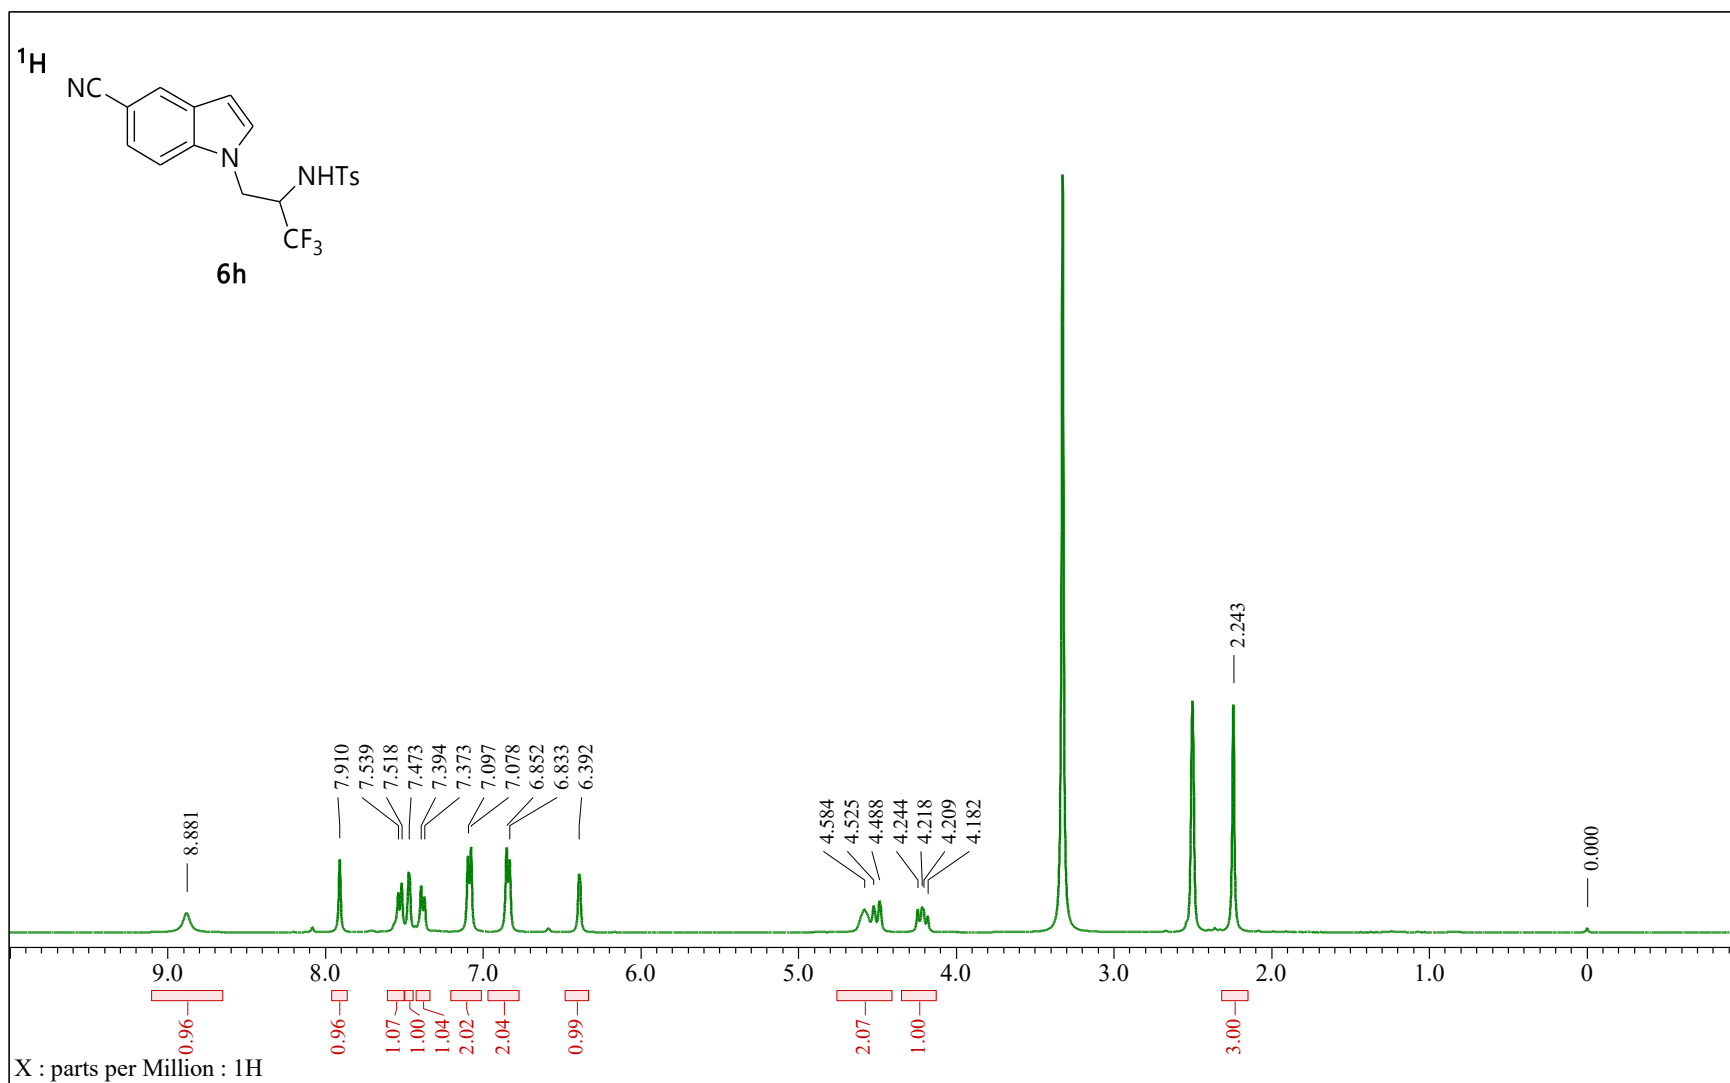

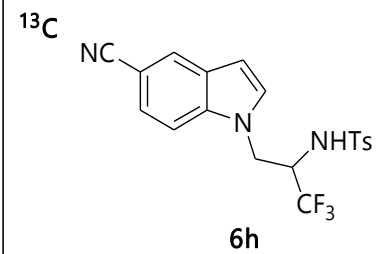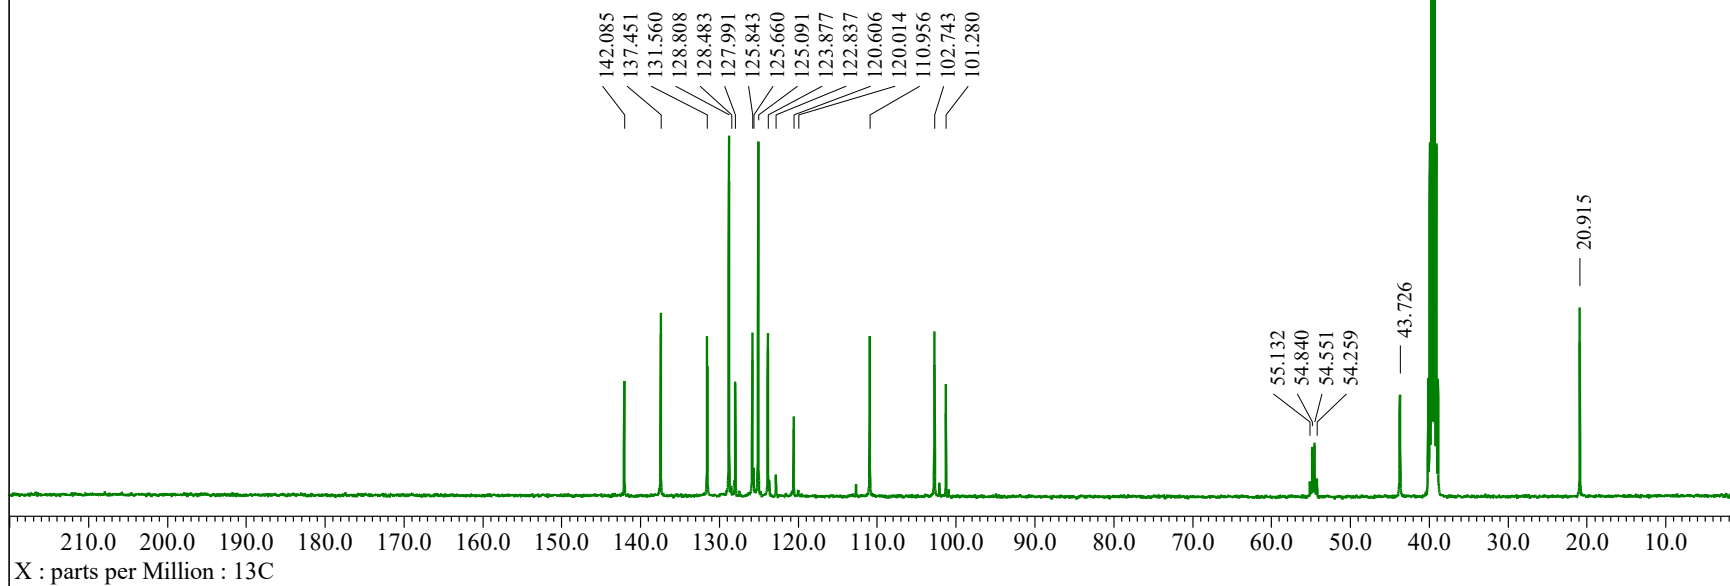

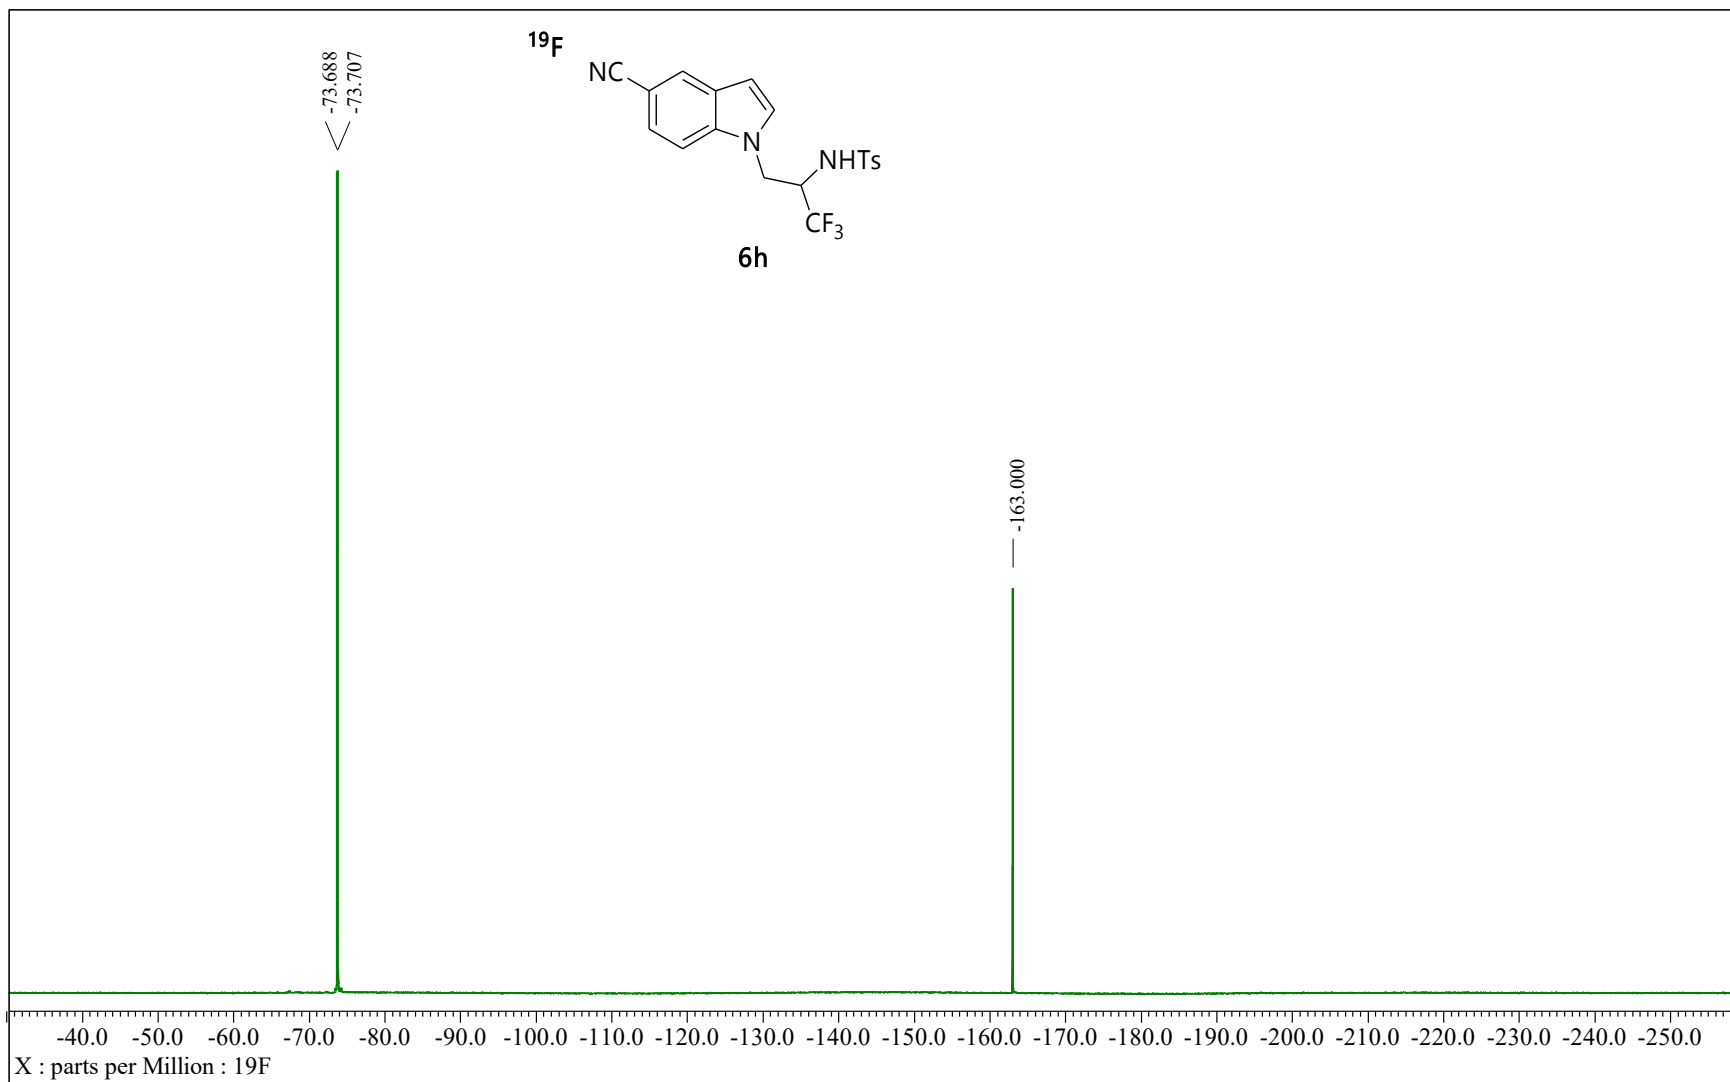

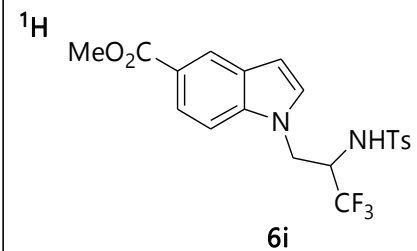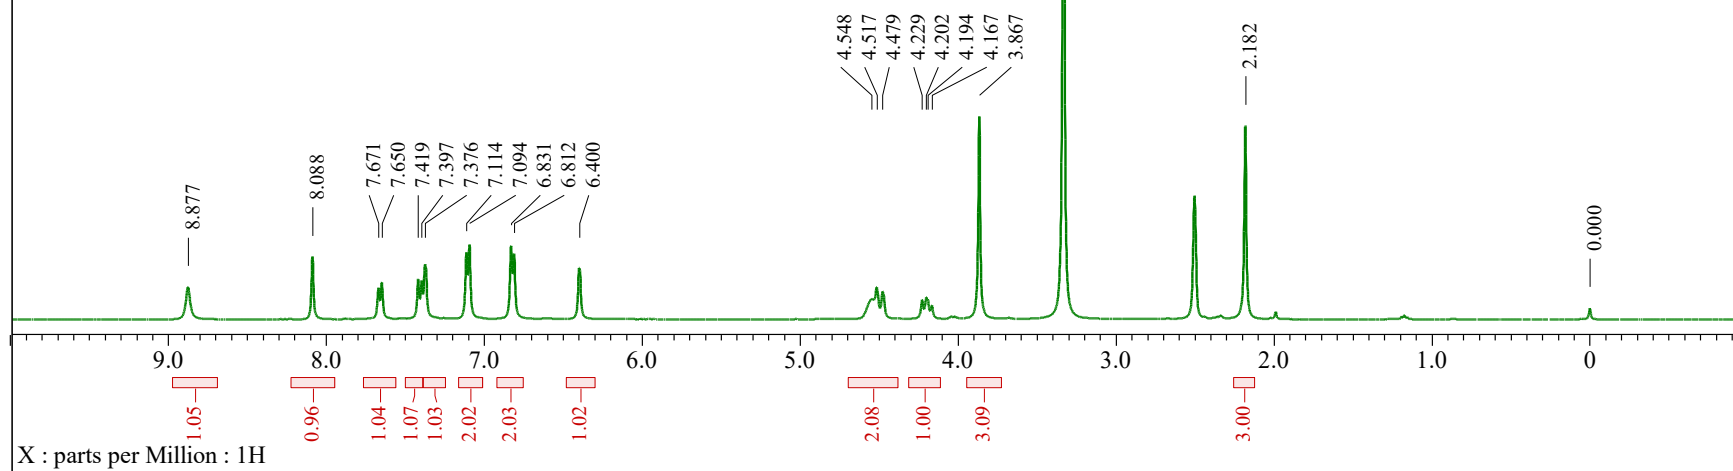

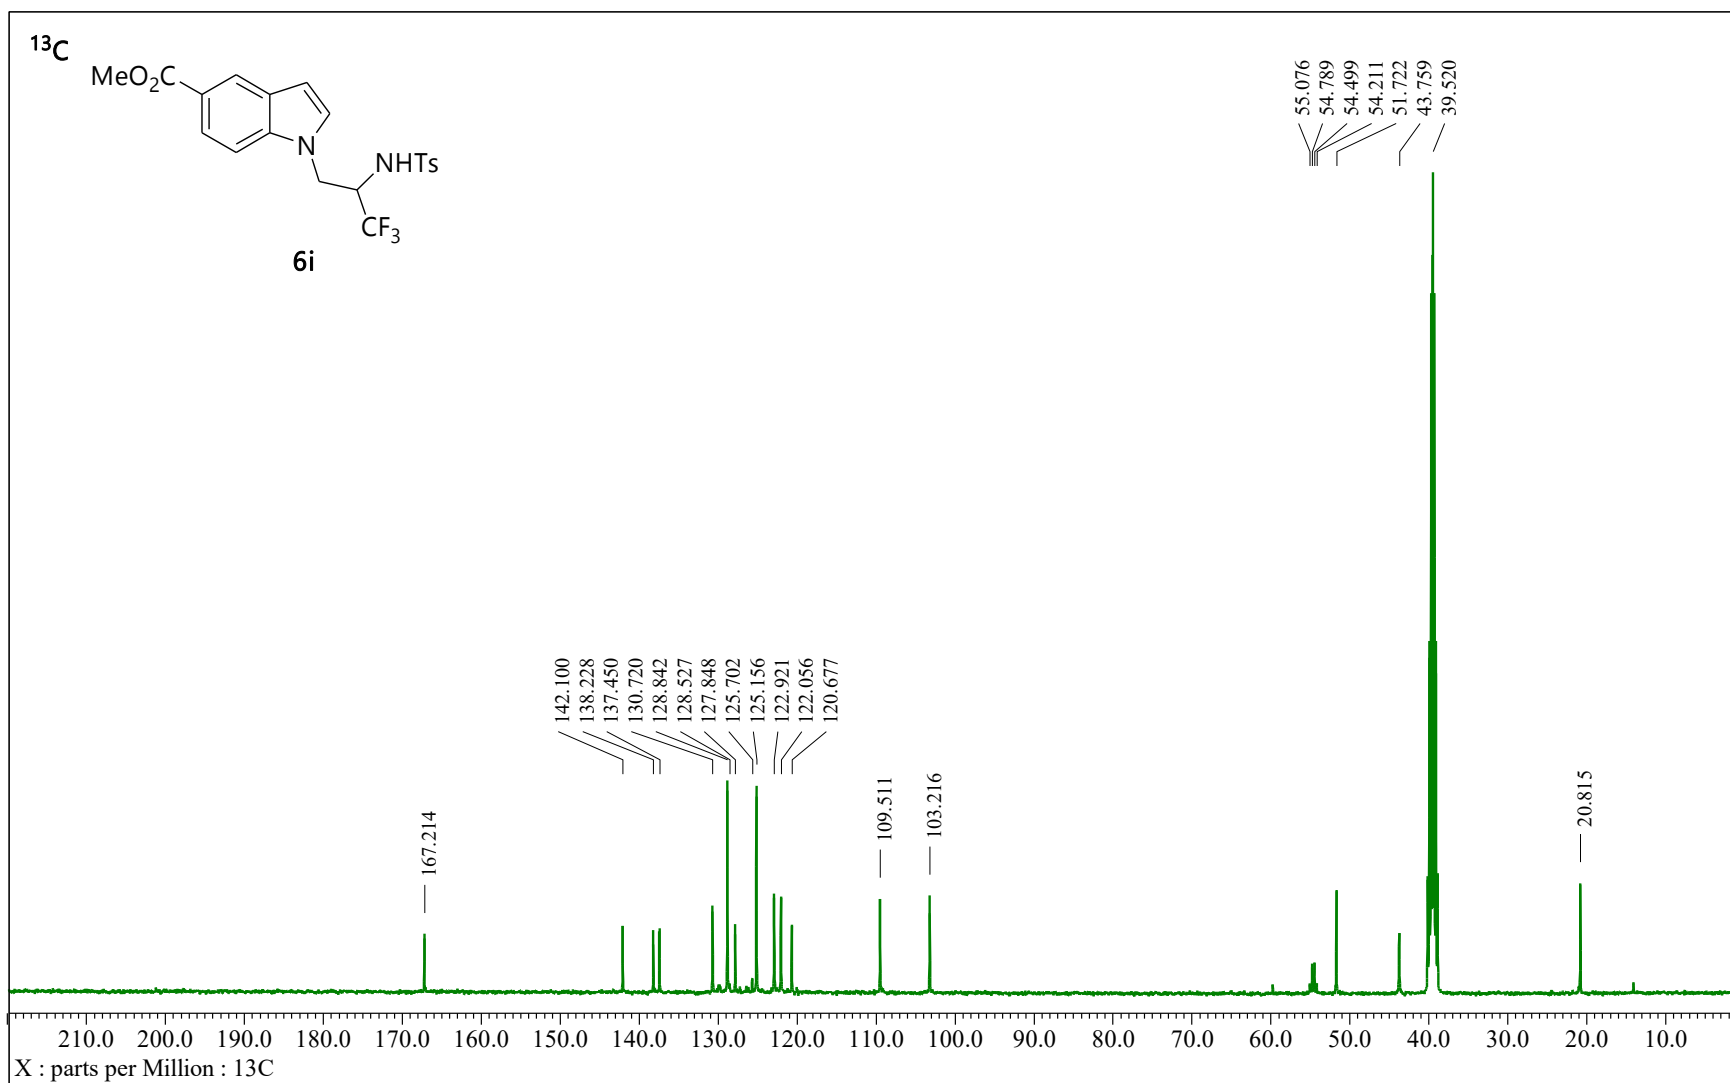

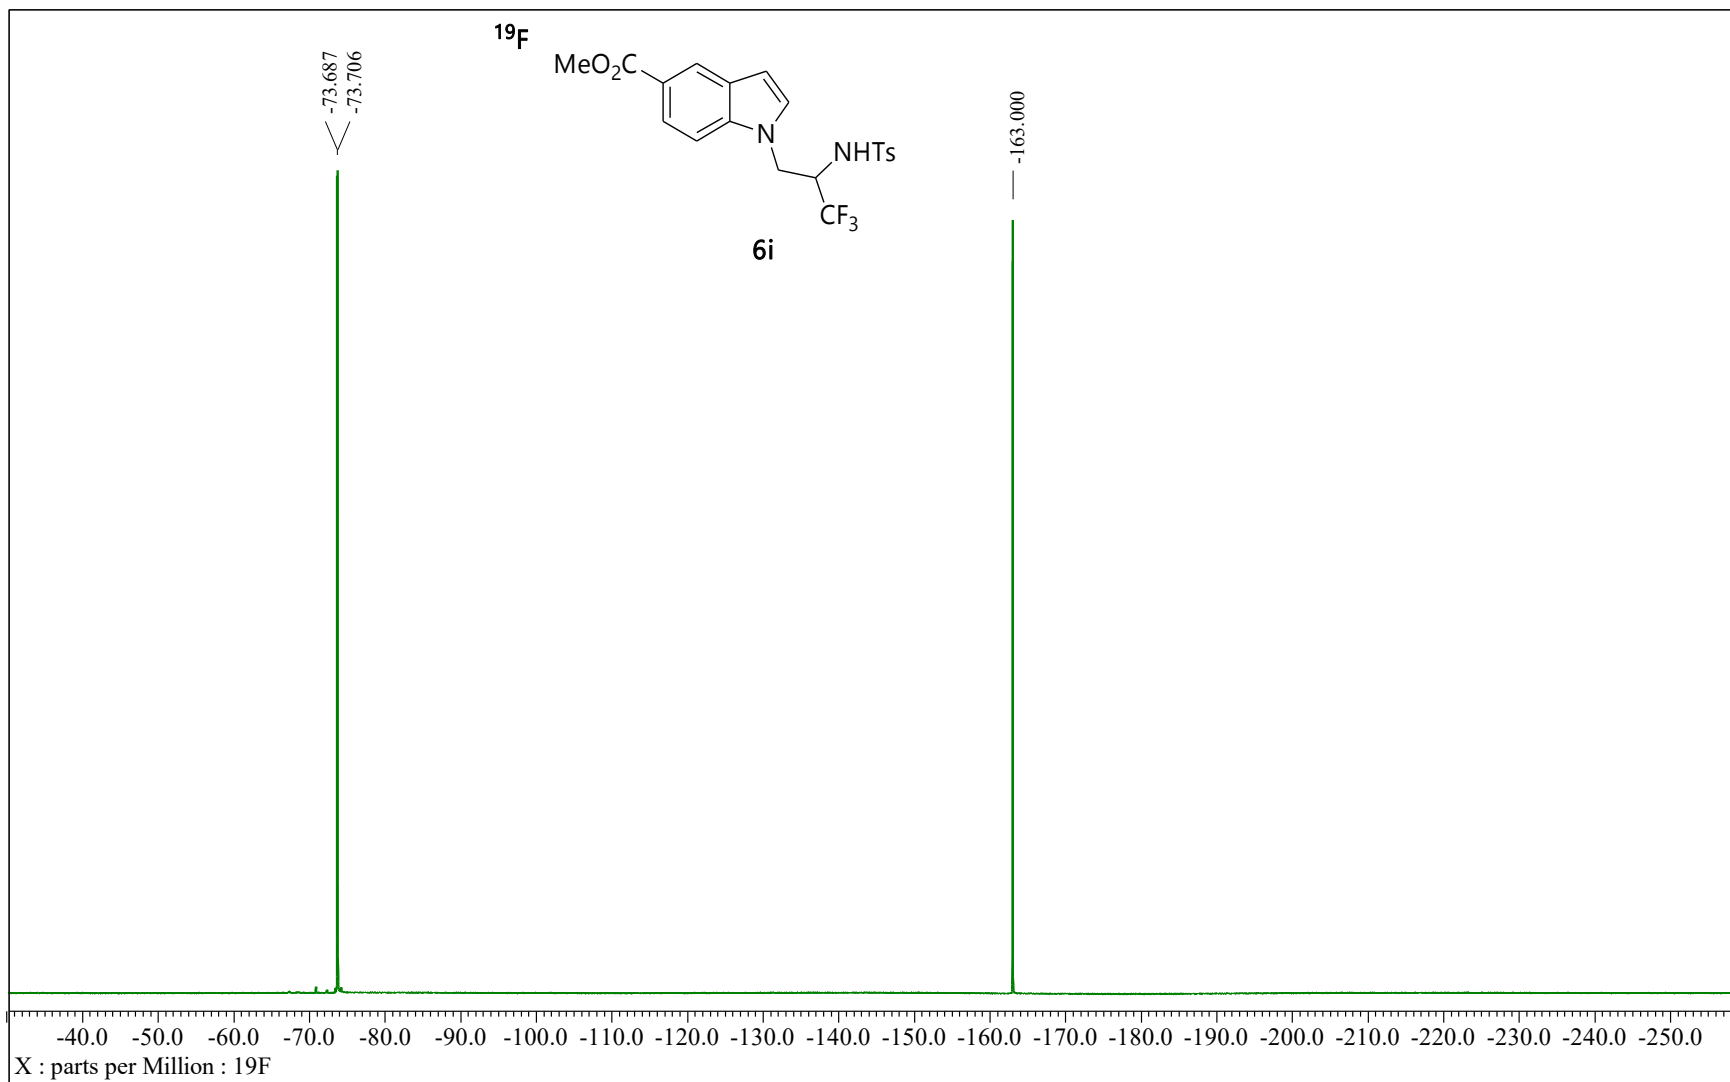



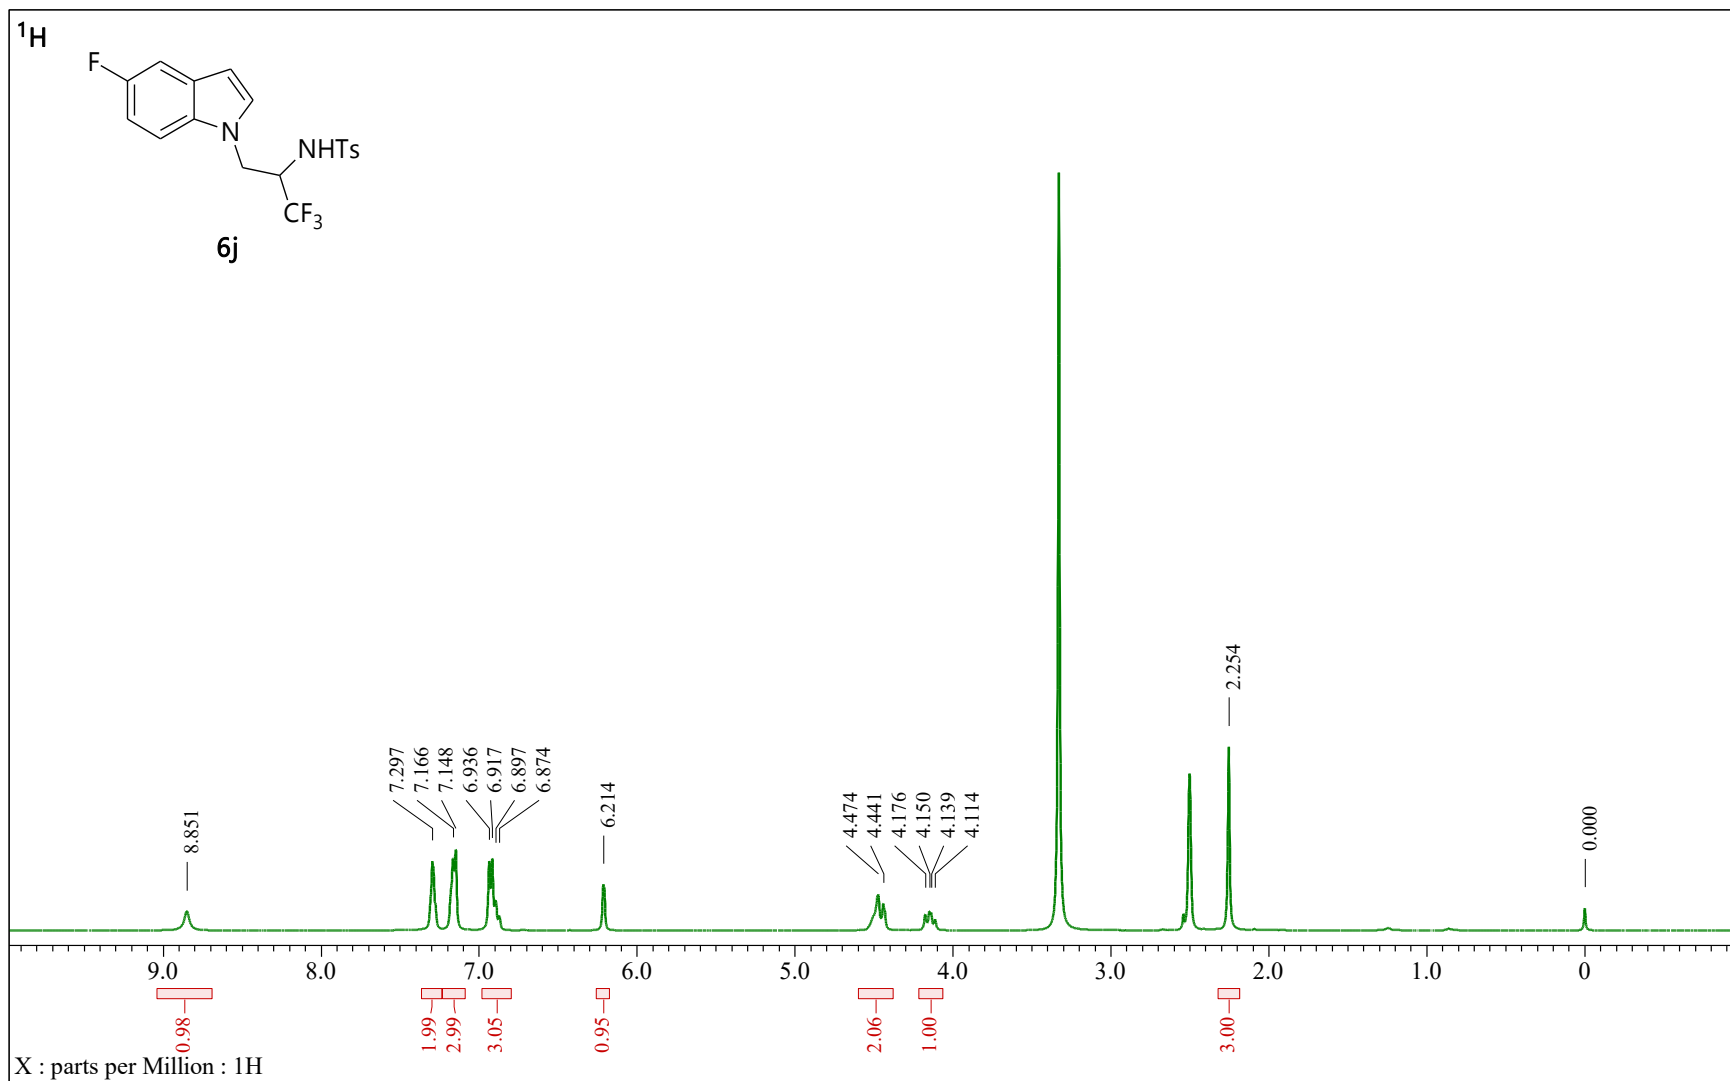

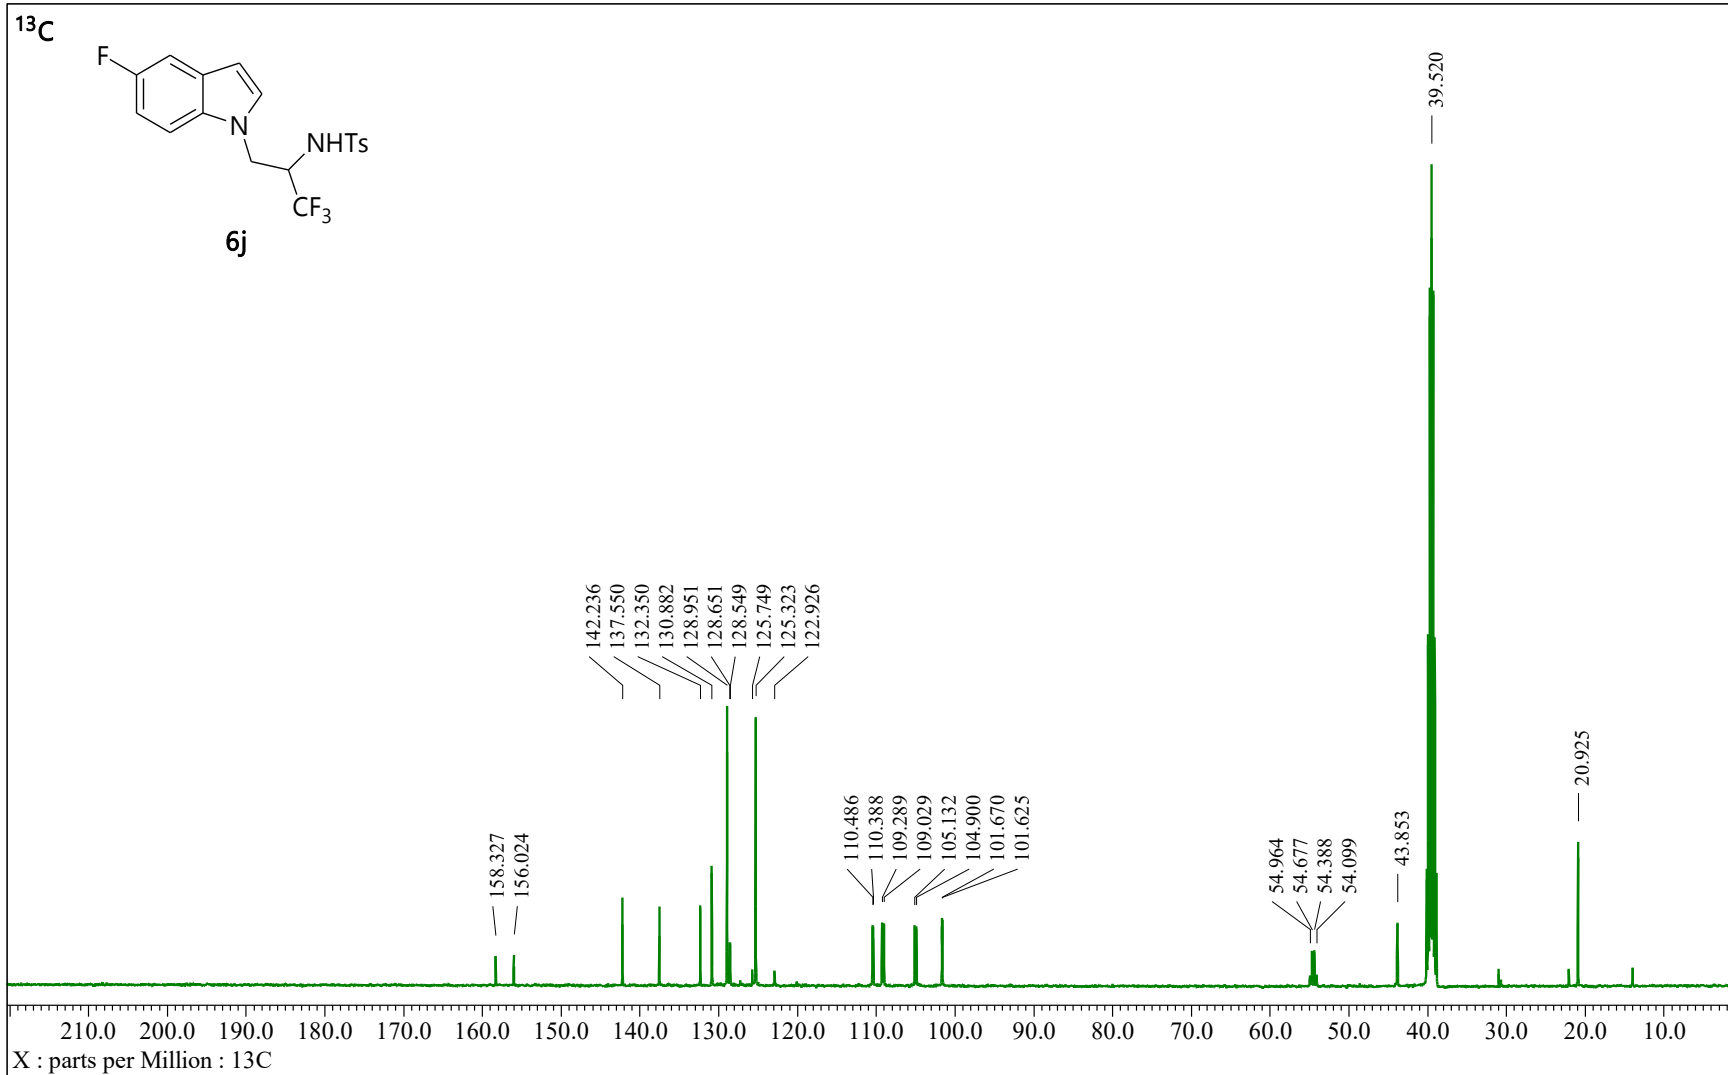

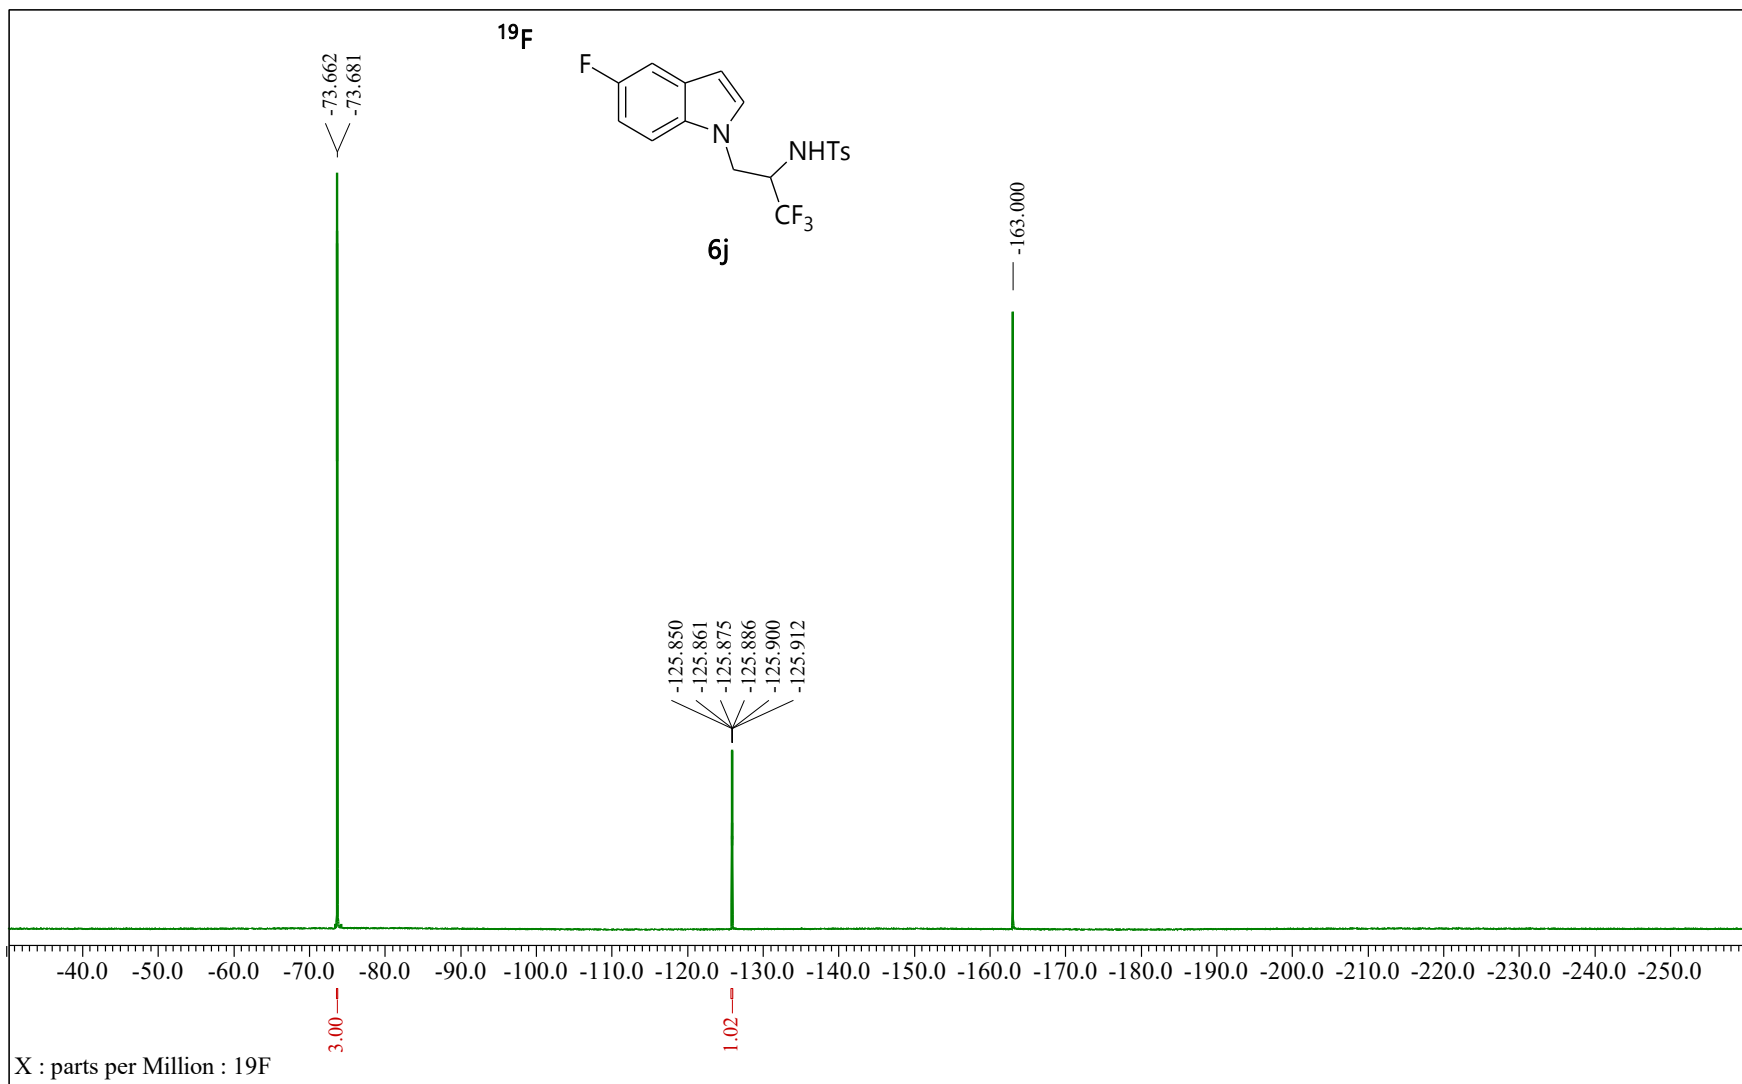

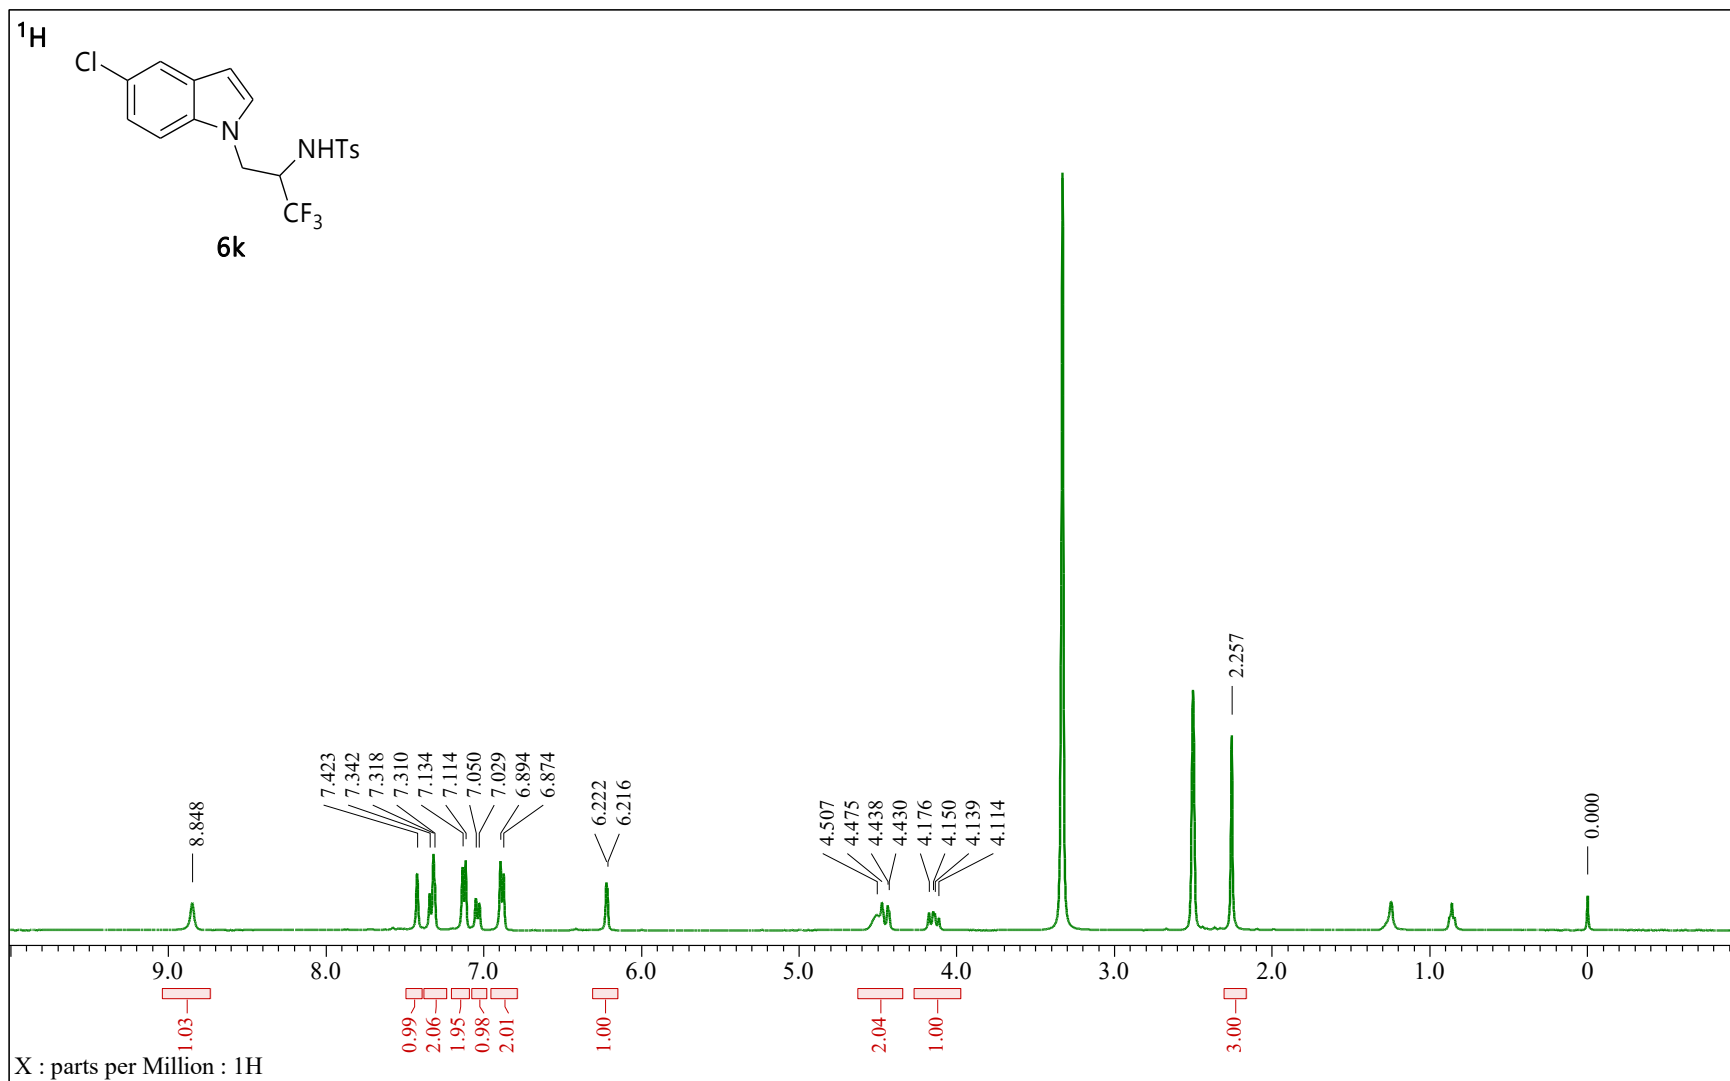

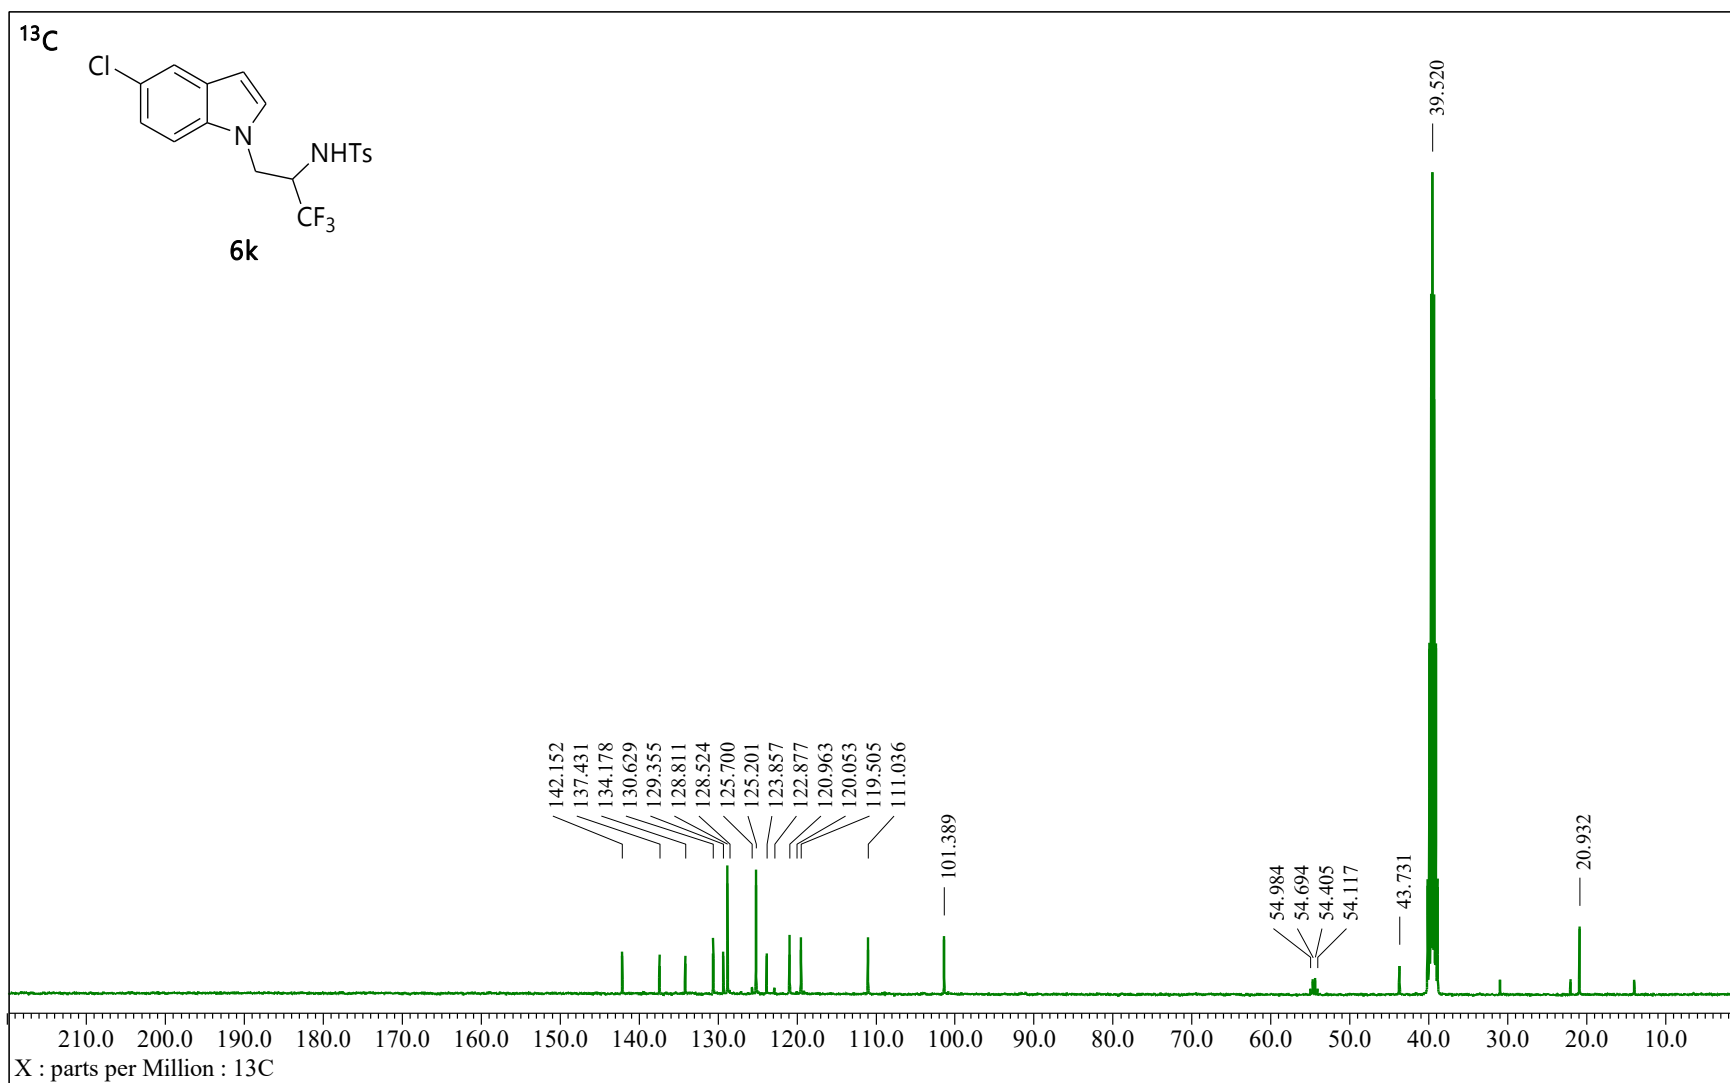

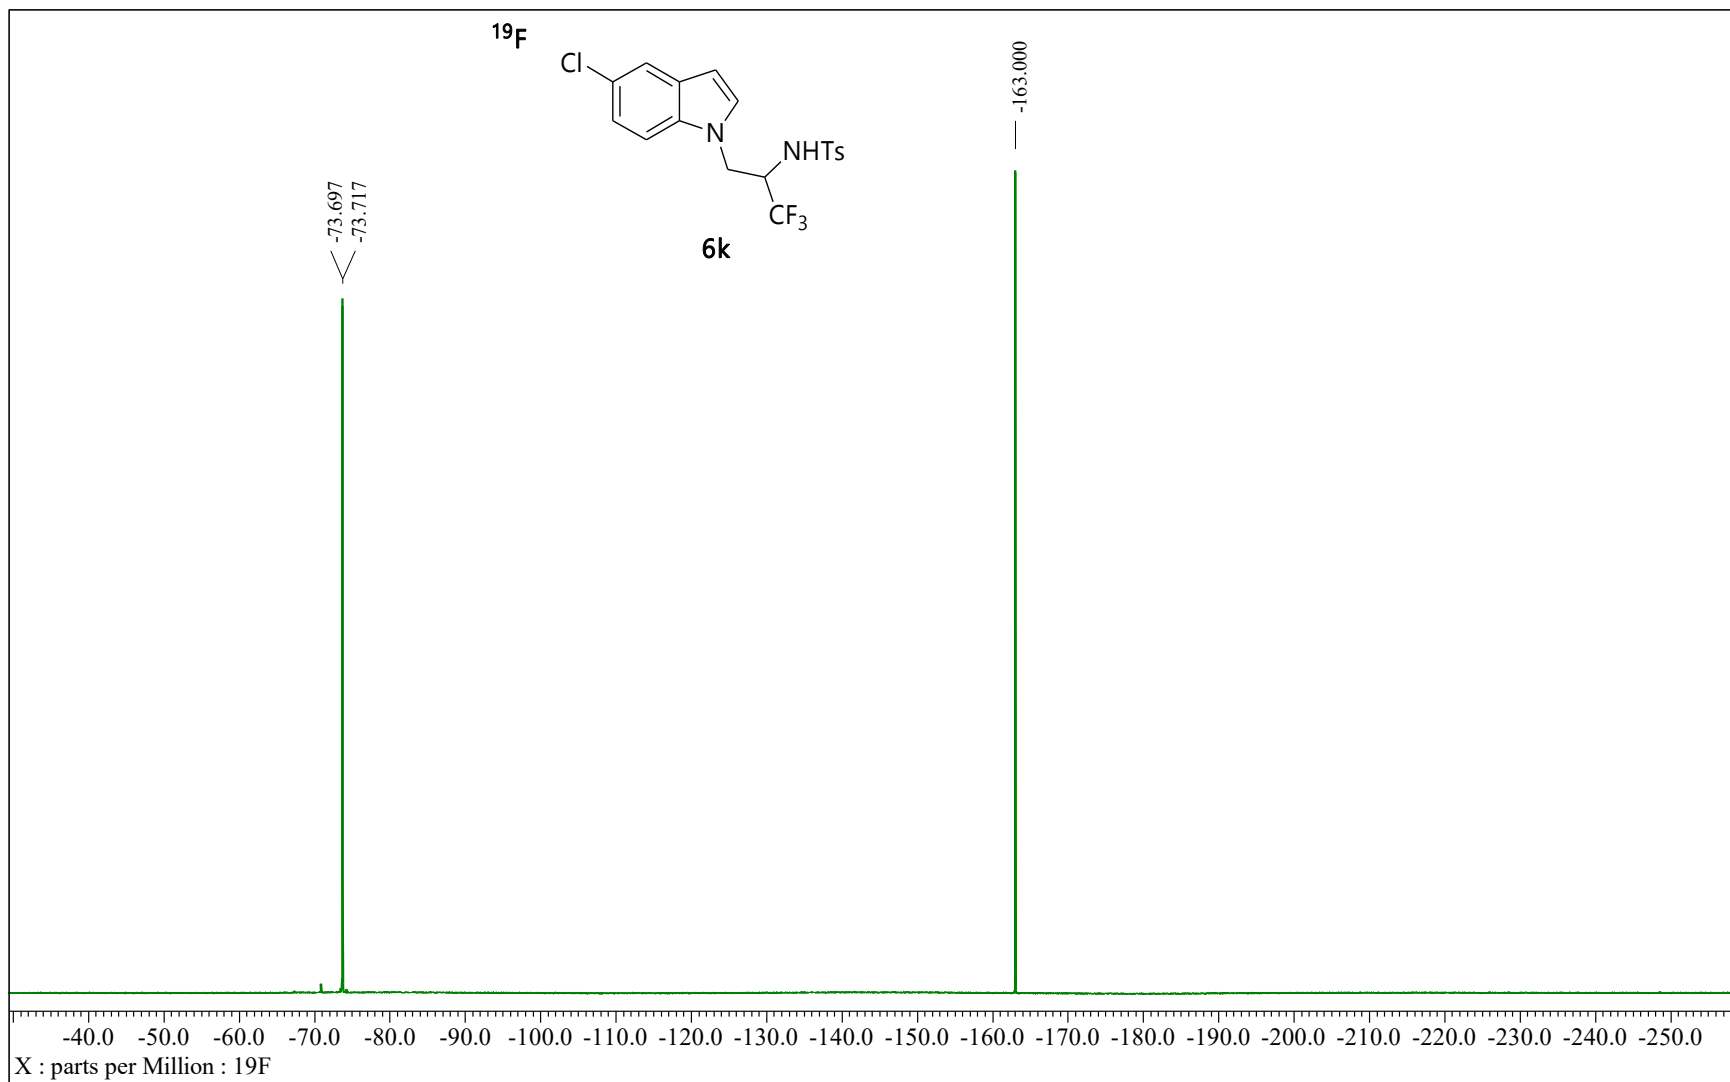

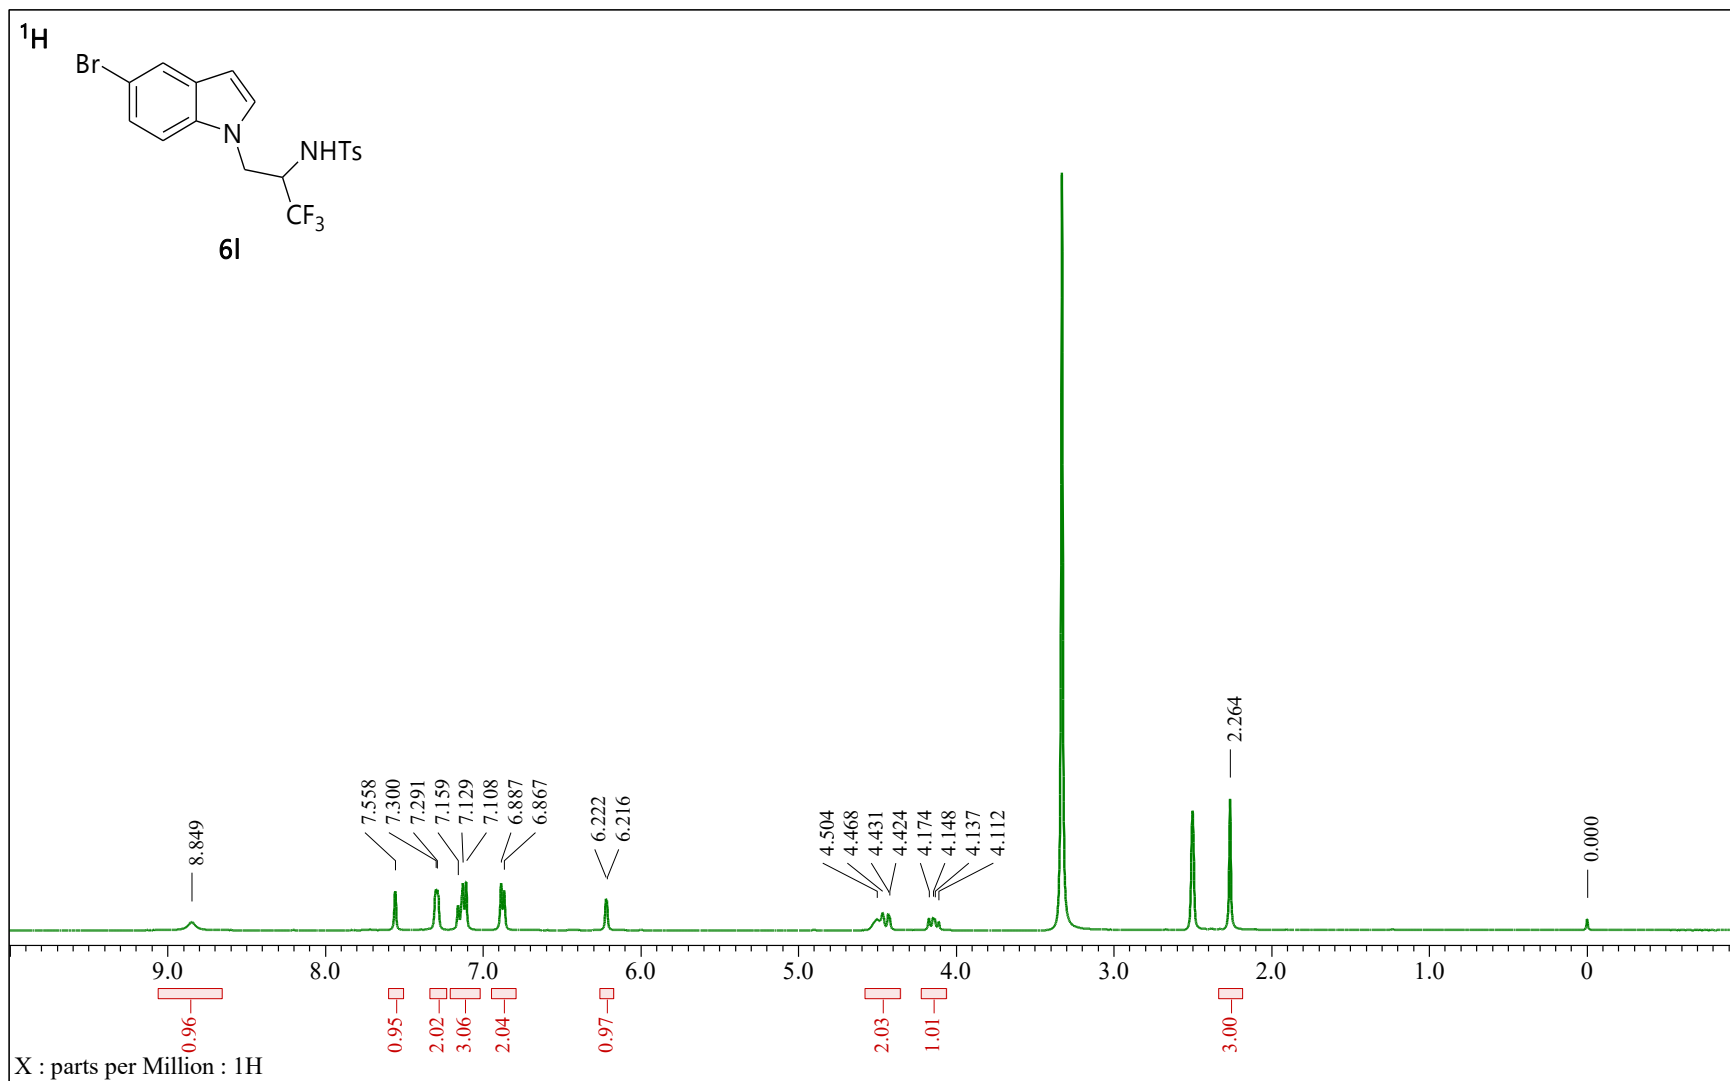

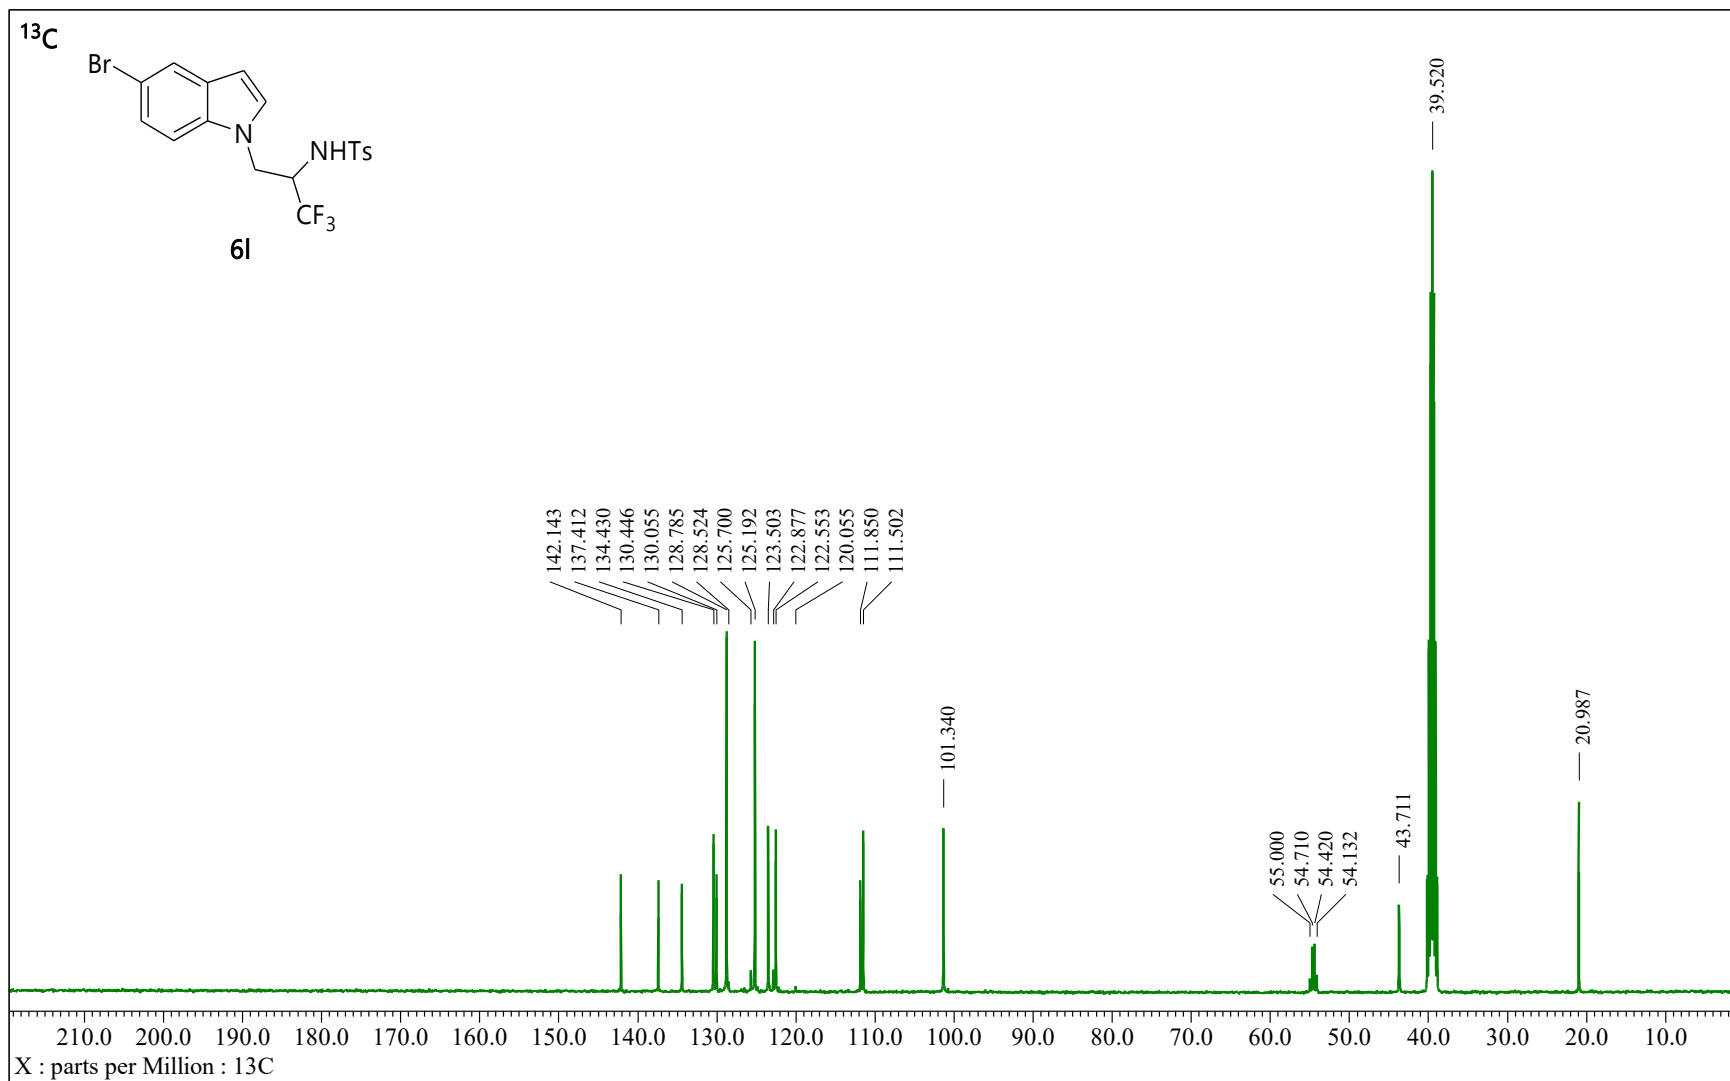



<sup>19</sup>F

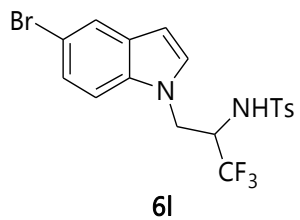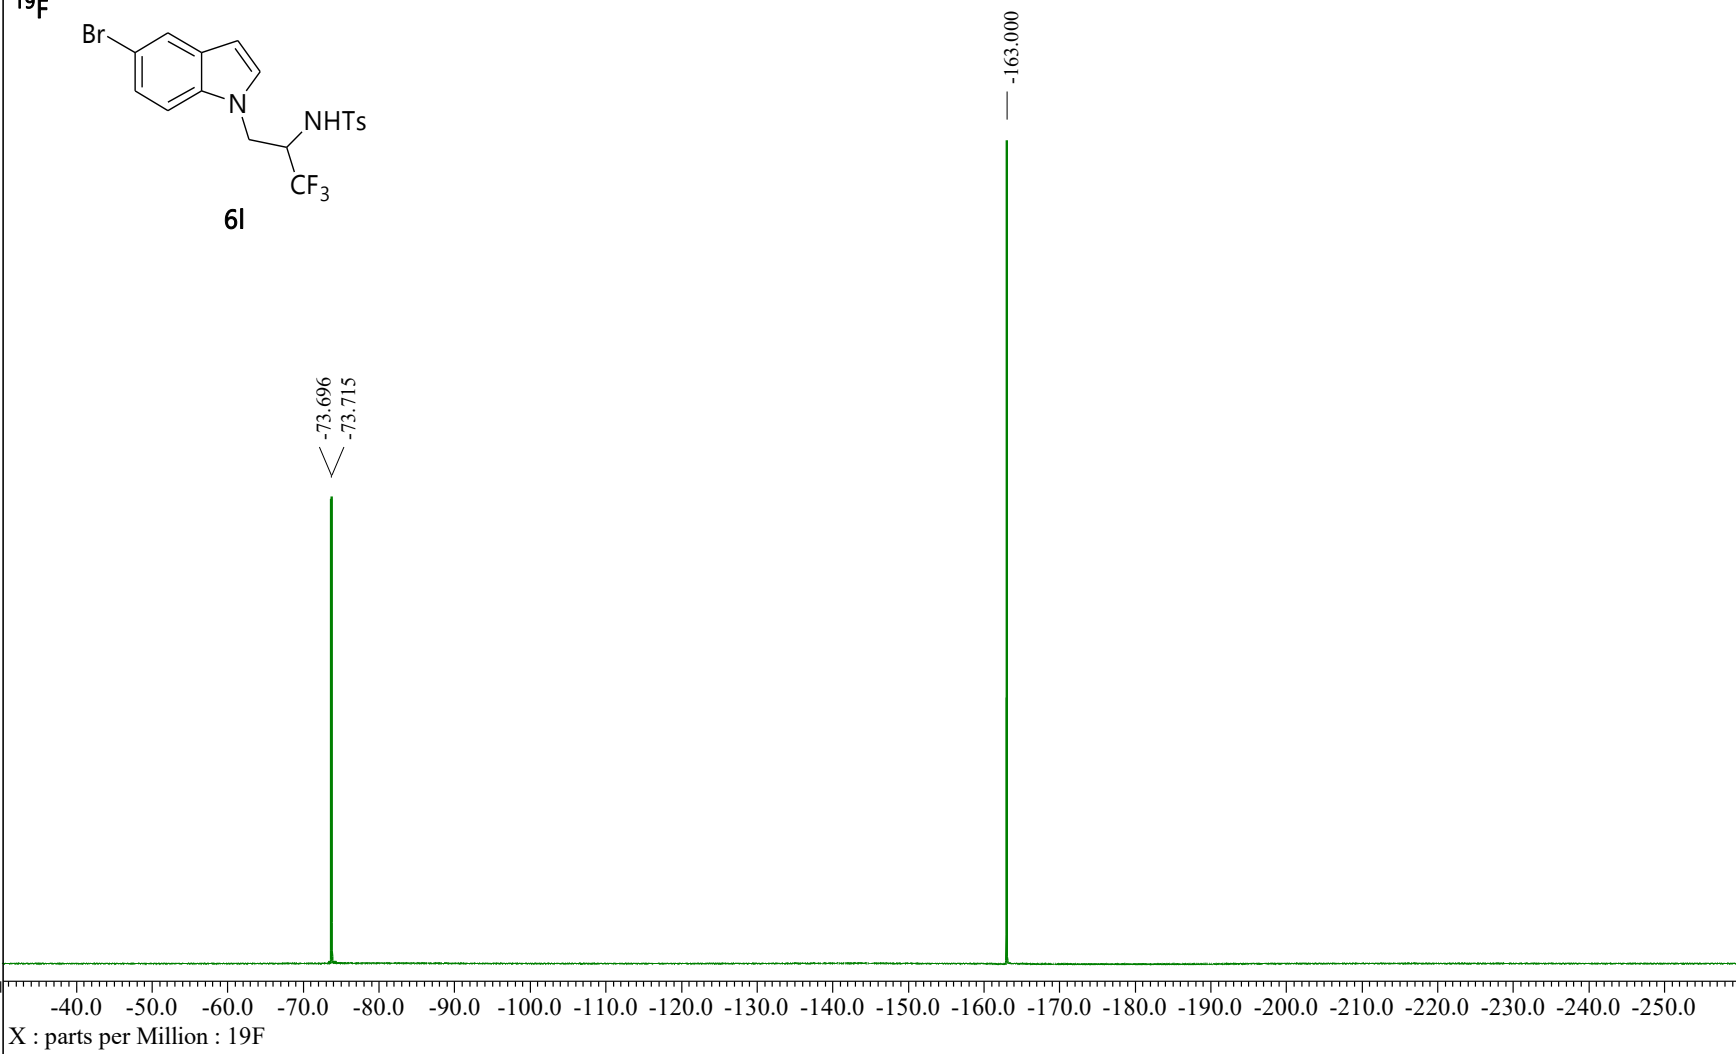

<sup>1</sup>H

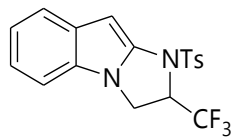

7a

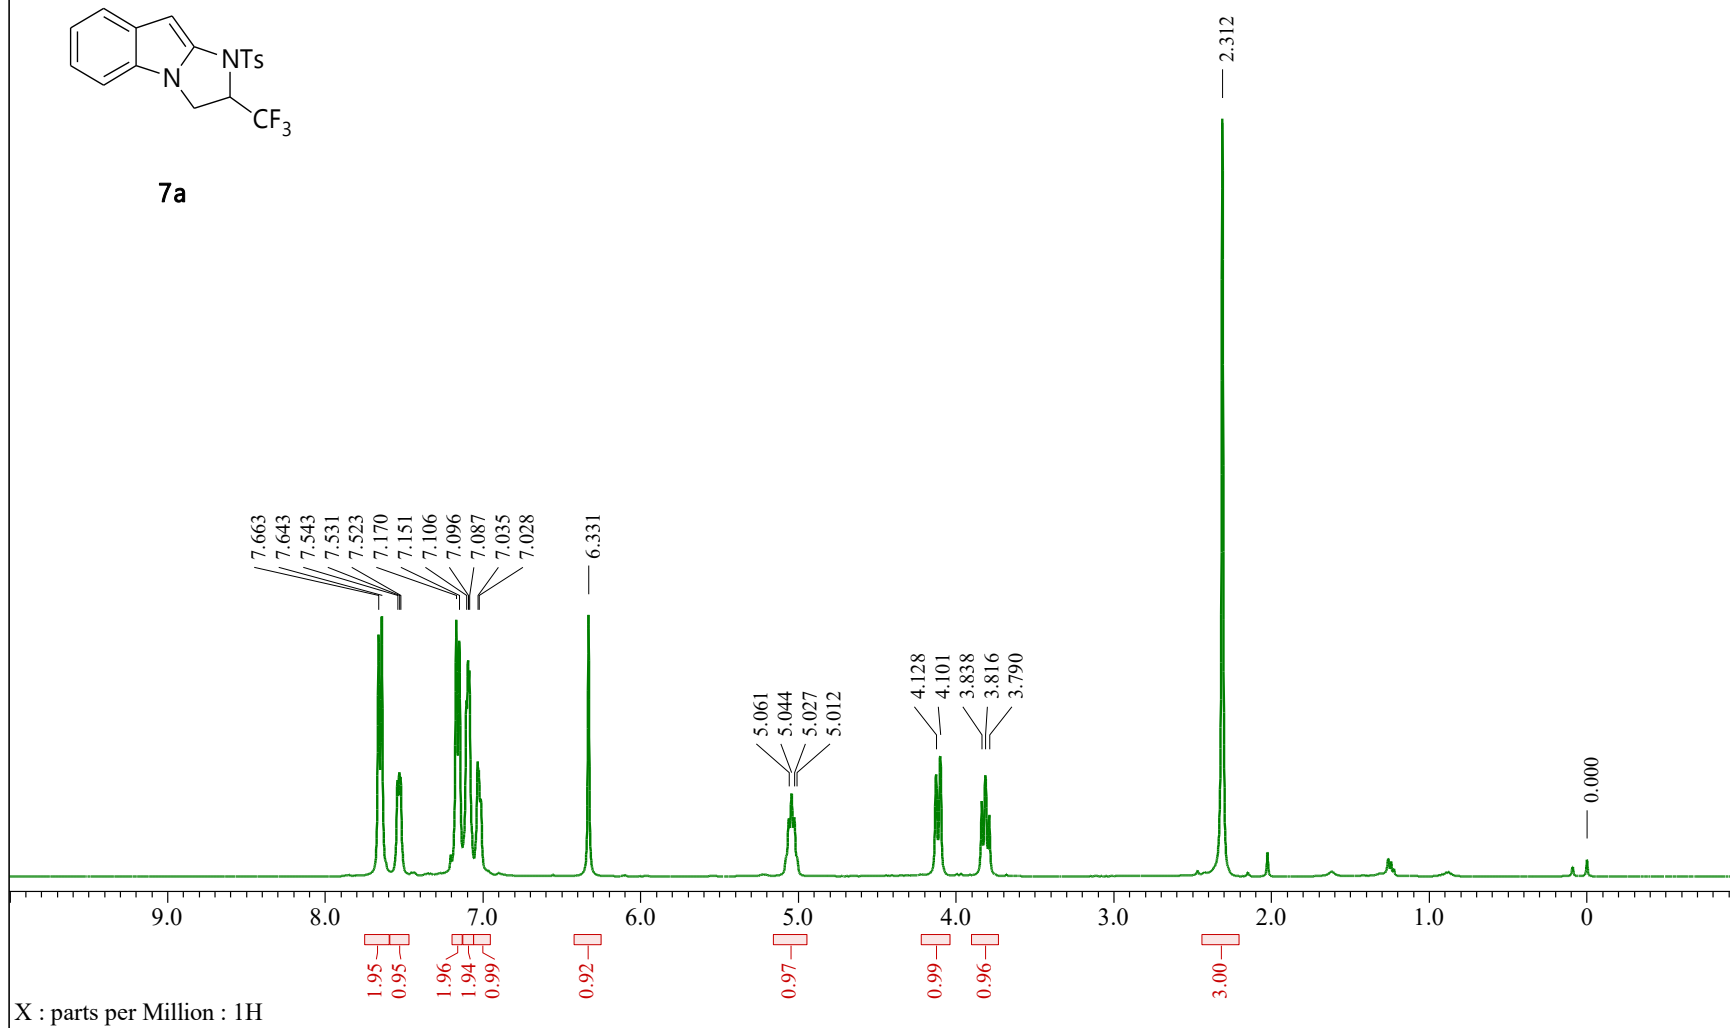

<sup>13</sup>C

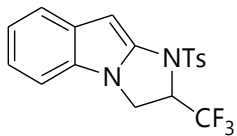

7a

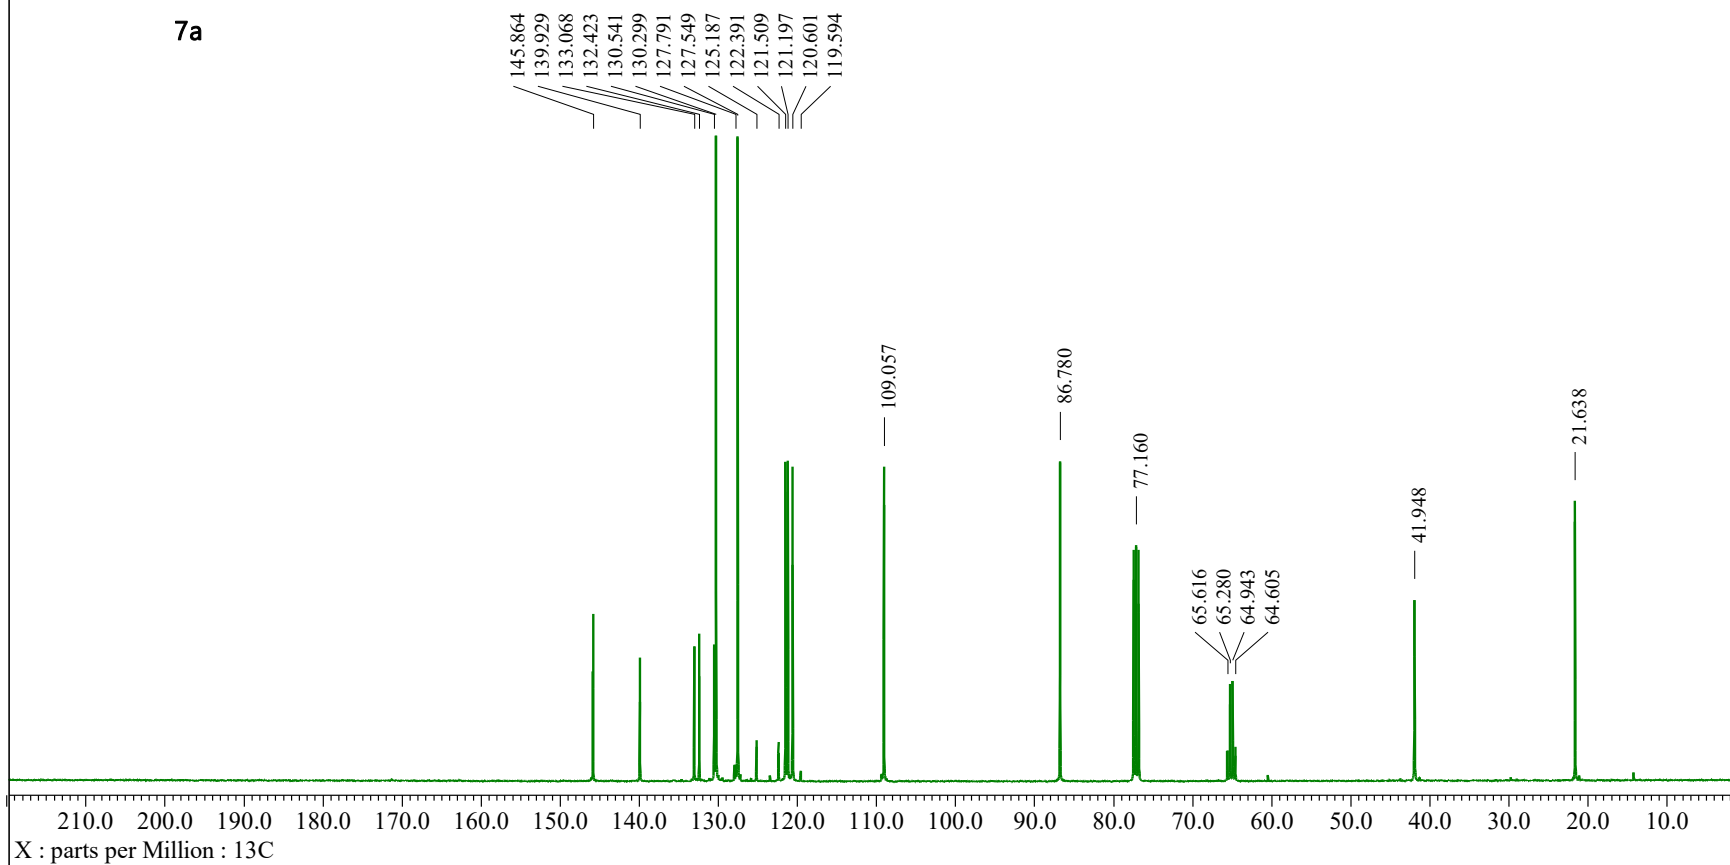

<sup>19</sup>F

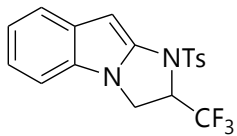

7a

-78.632  
-78.650

-163.000

X : parts per Million : <sup>19</sup>F

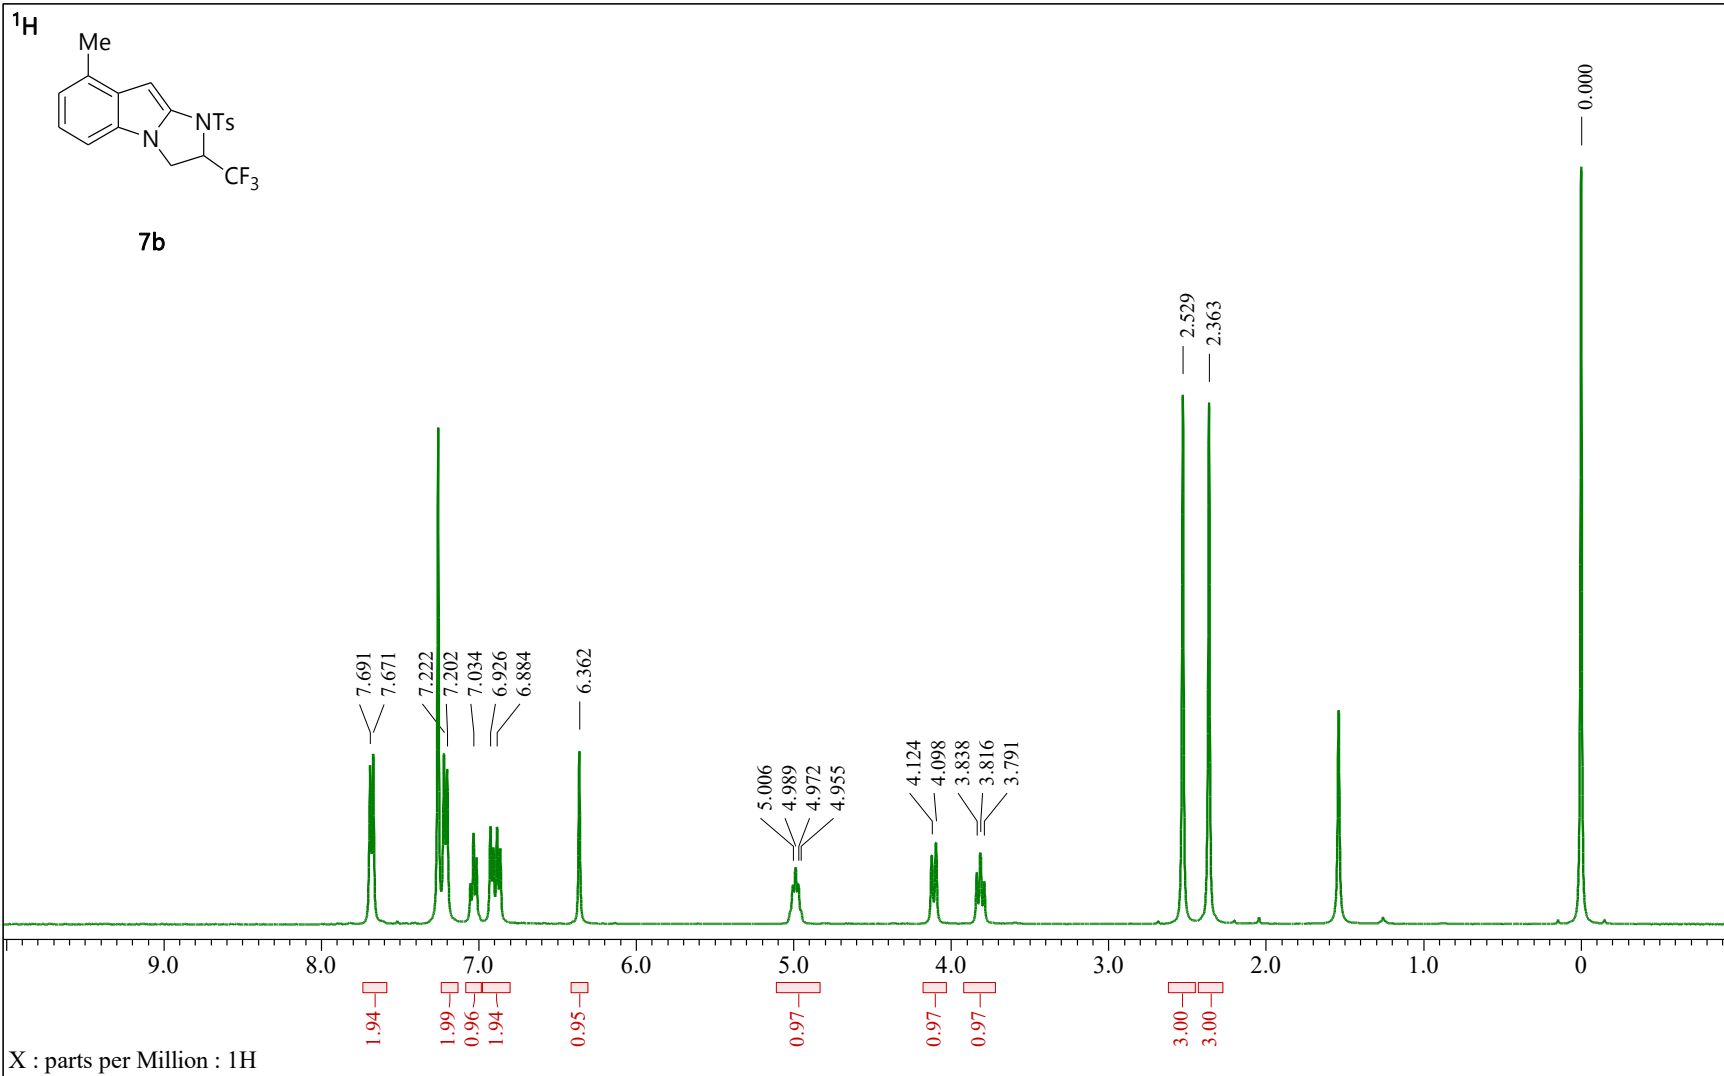

<sup>13</sup>C

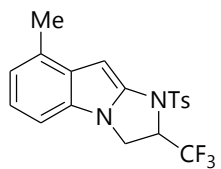

7b

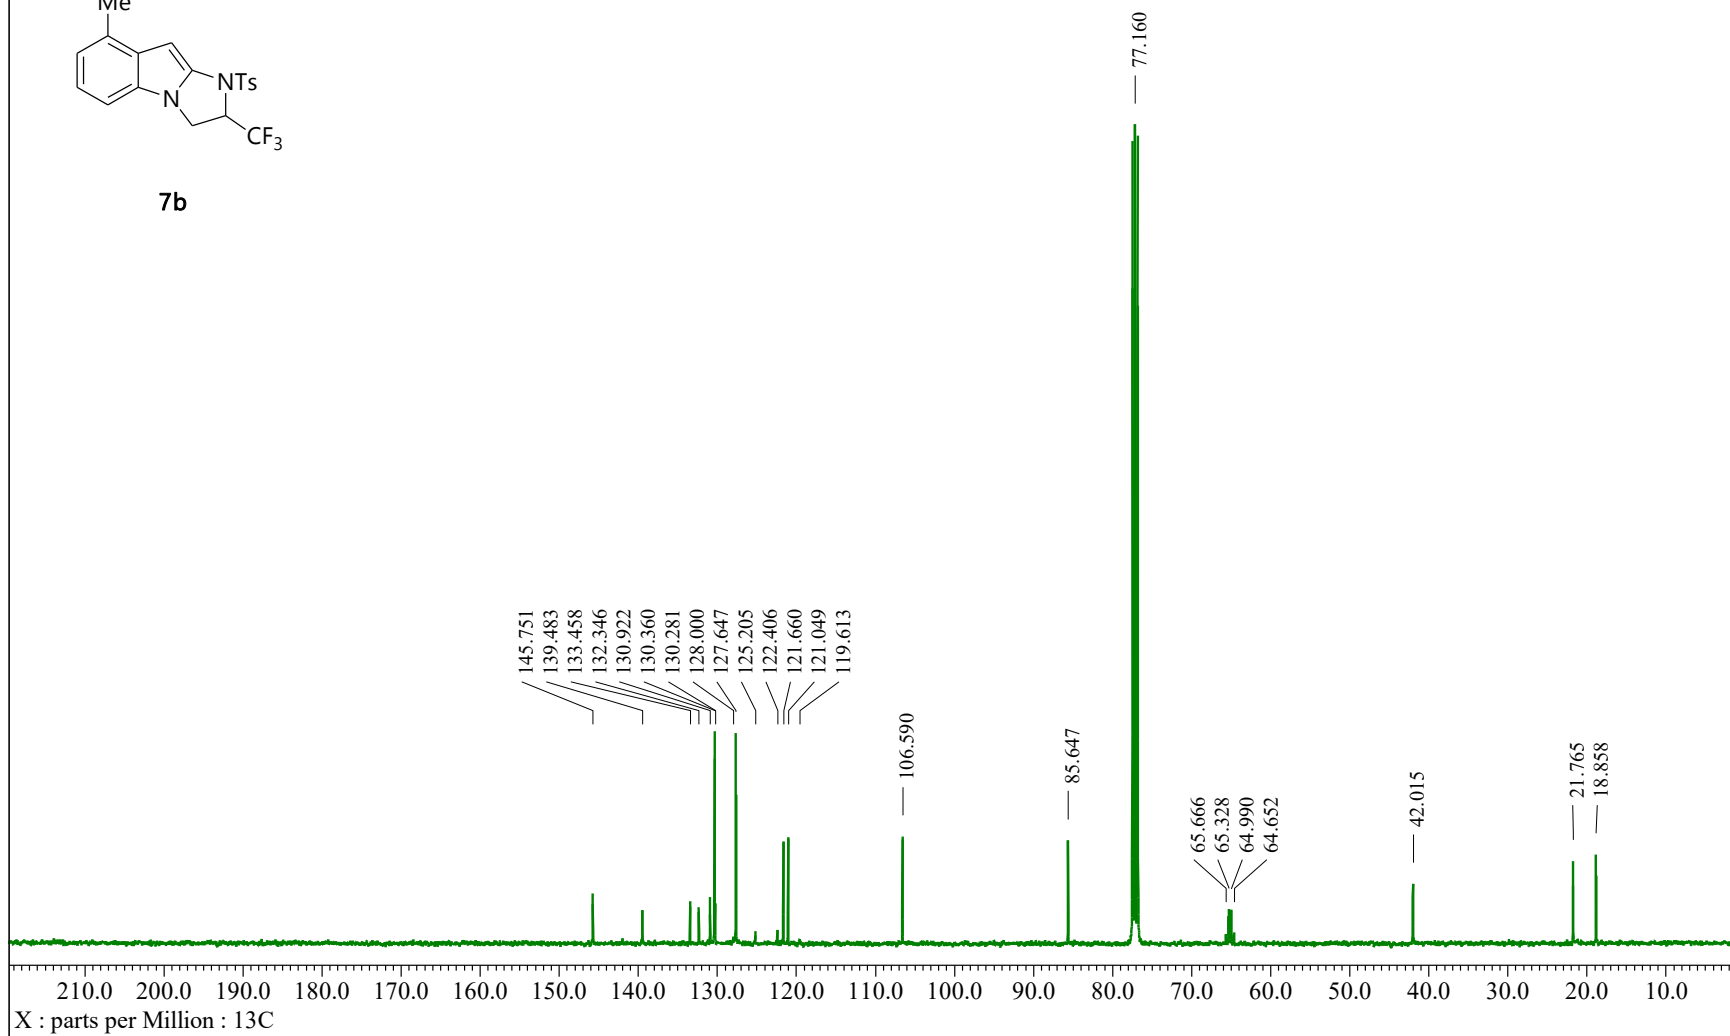

<sup>19</sup>F

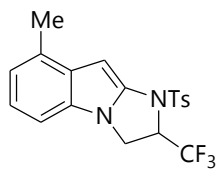

**7b**

-78.641  
-78.659

-163.000

-40.0 -50.0 -60.0 -70.0 -80.0 -90.0 -100.0 -110.0 -120.0 -130.0 -140.0 -150.0 -160.0 -170.0 -180.0 -190.0 -200.0 -210.0 -220.0 -230.0 -240.0 -250.0  
X : parts per Million : <sup>19</sup>F

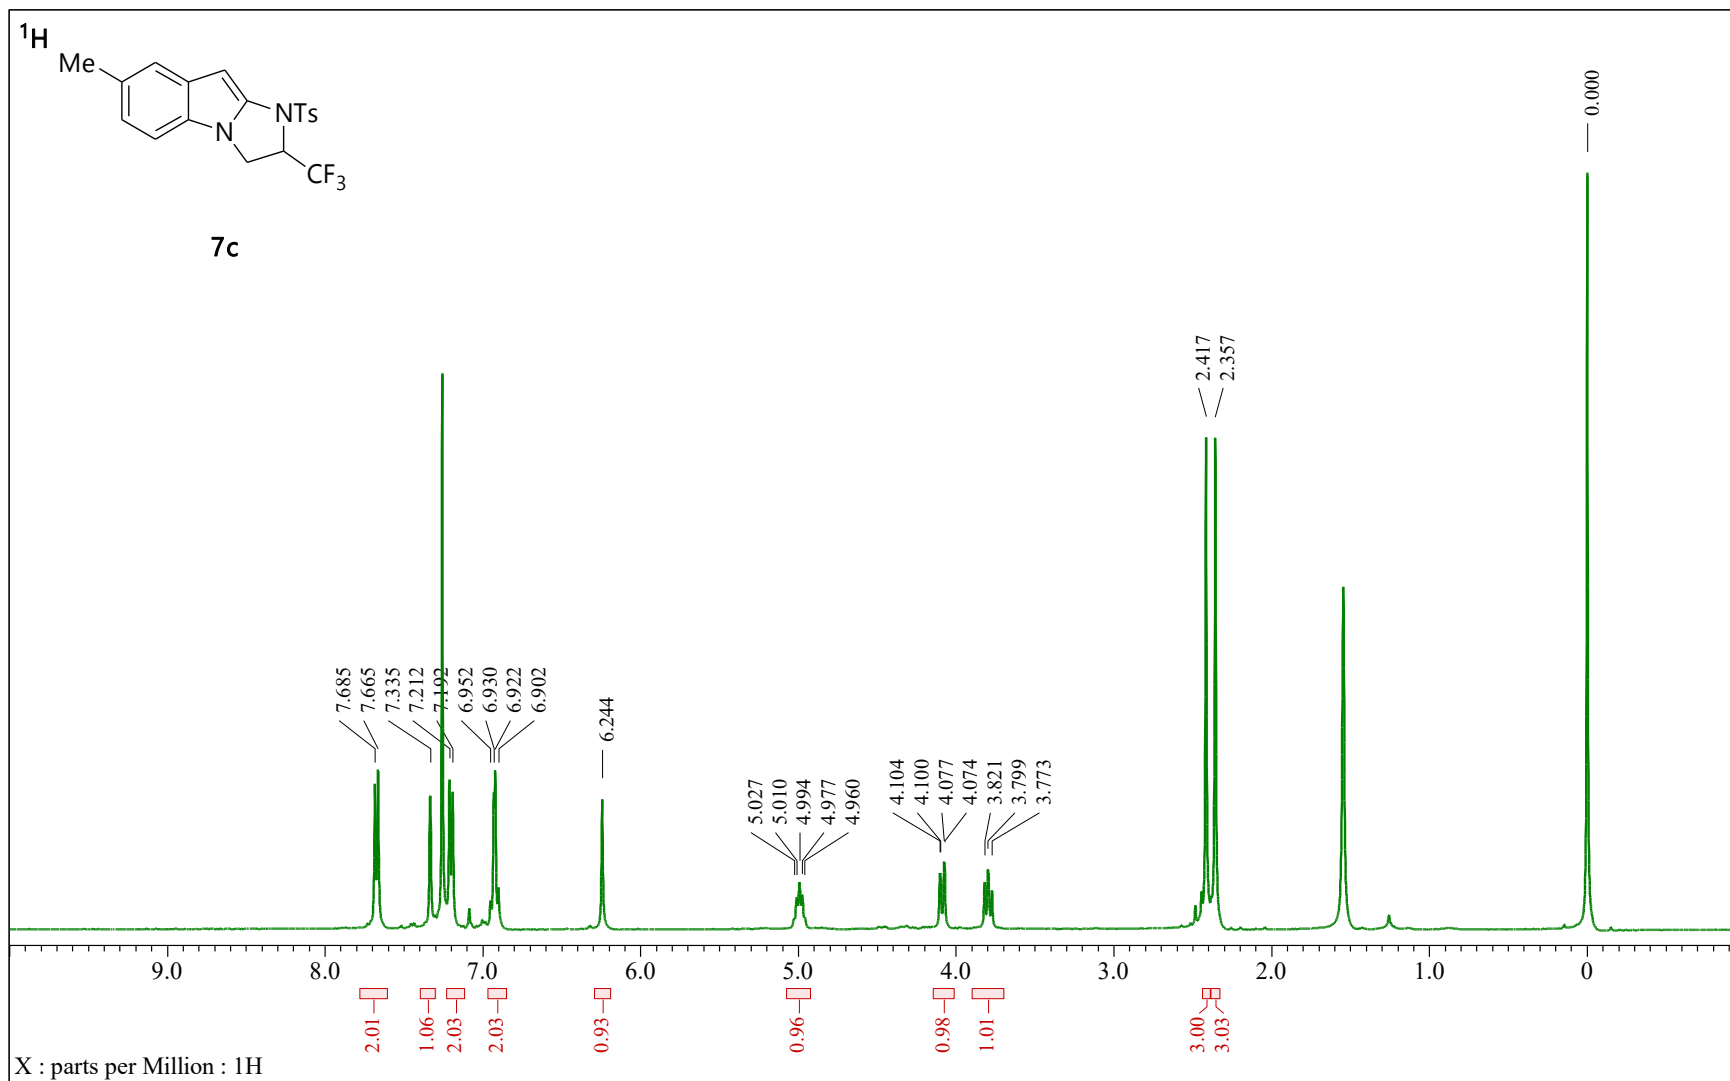



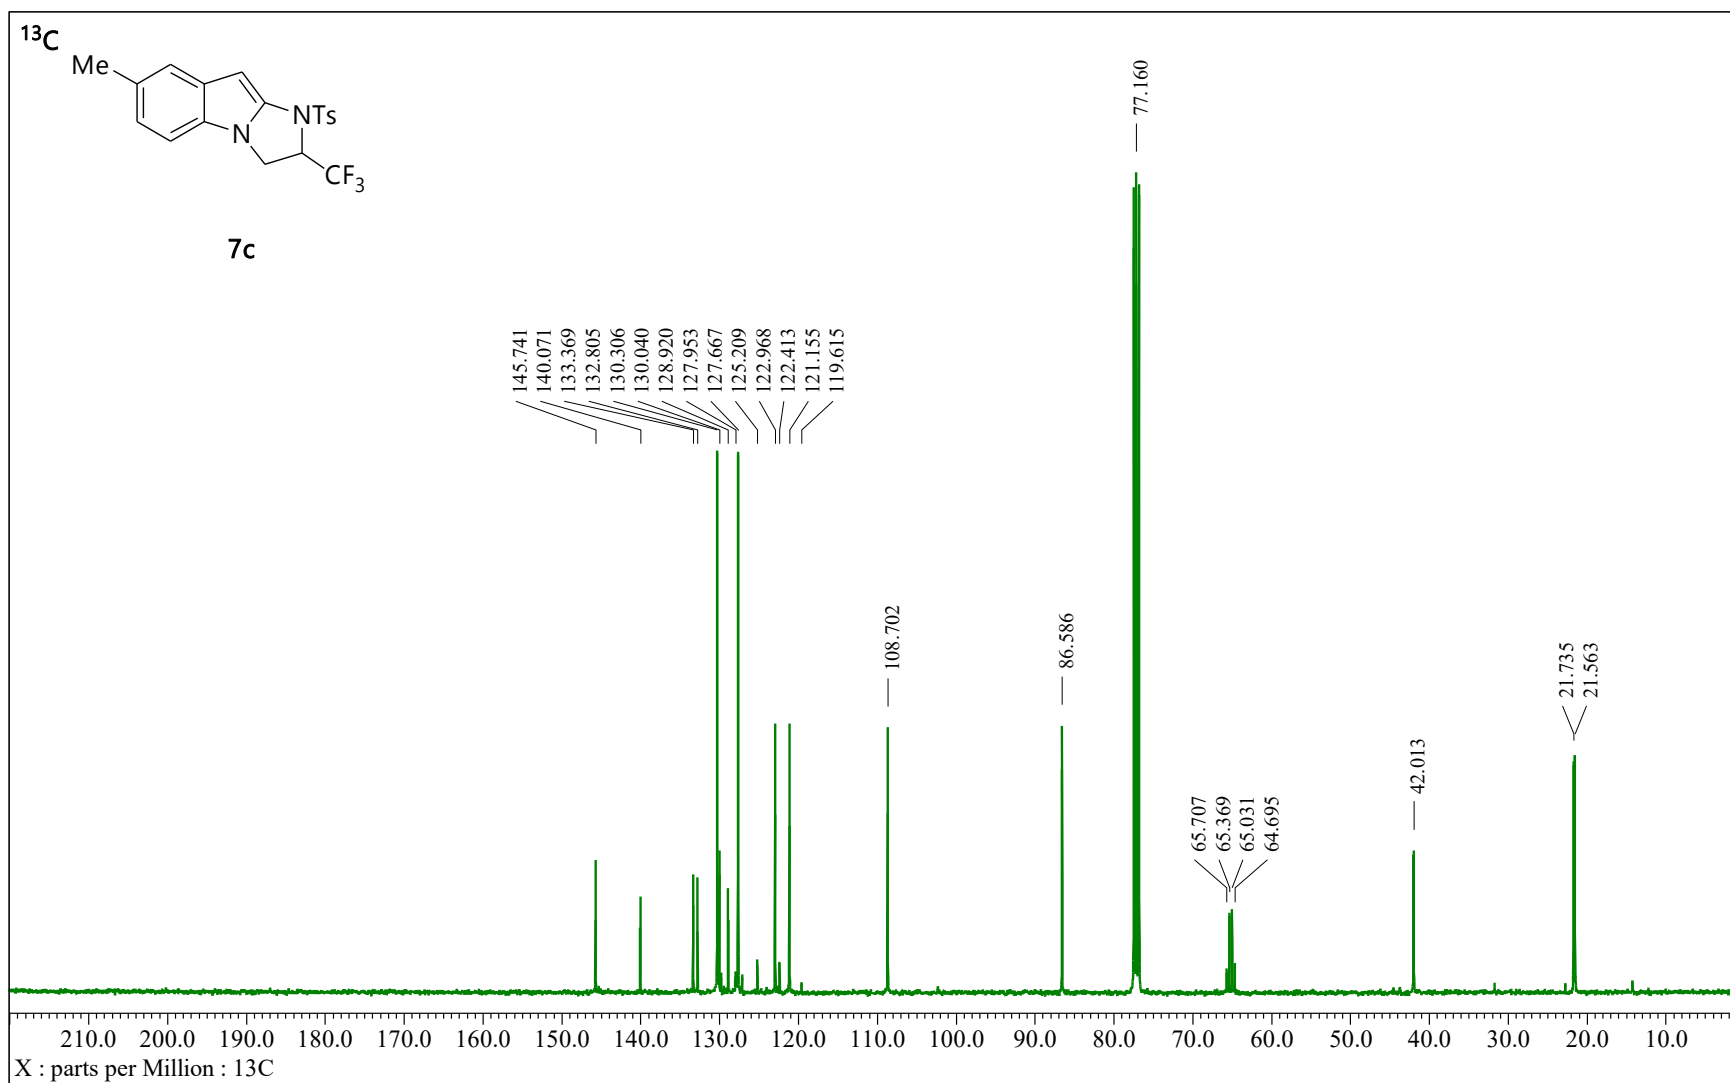

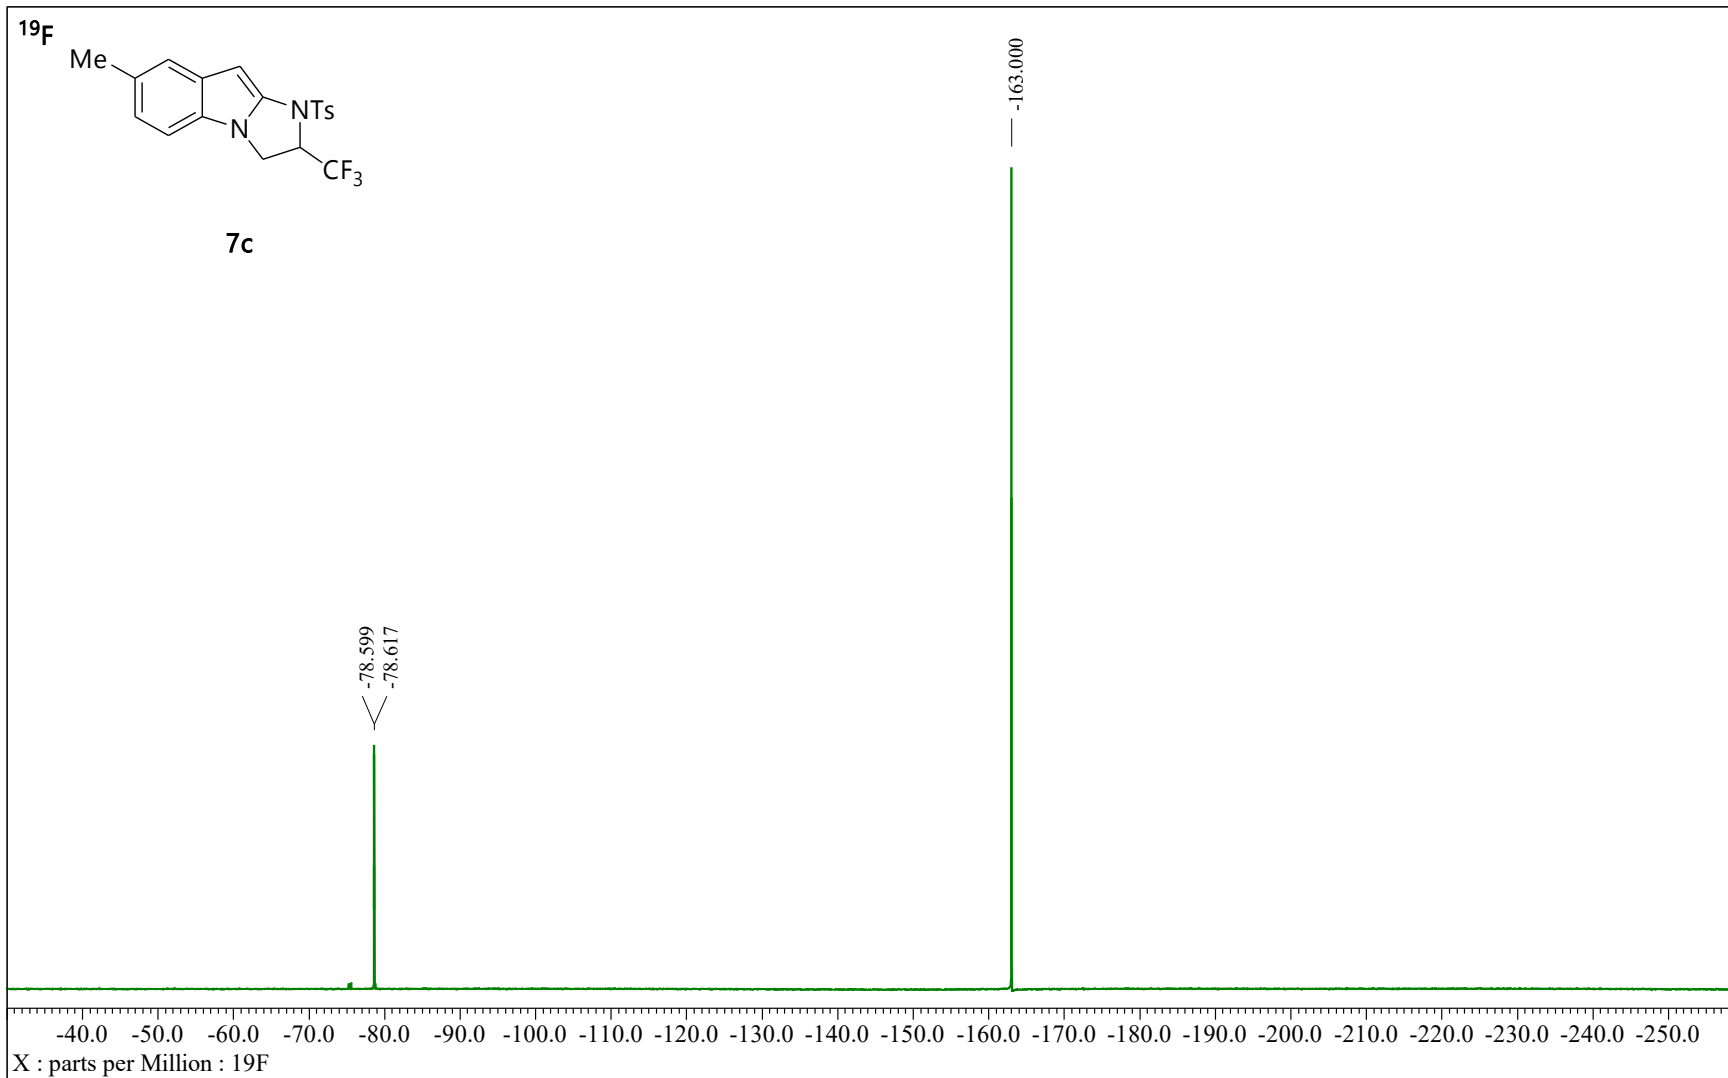

<sup>1</sup>H

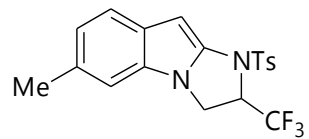

7d

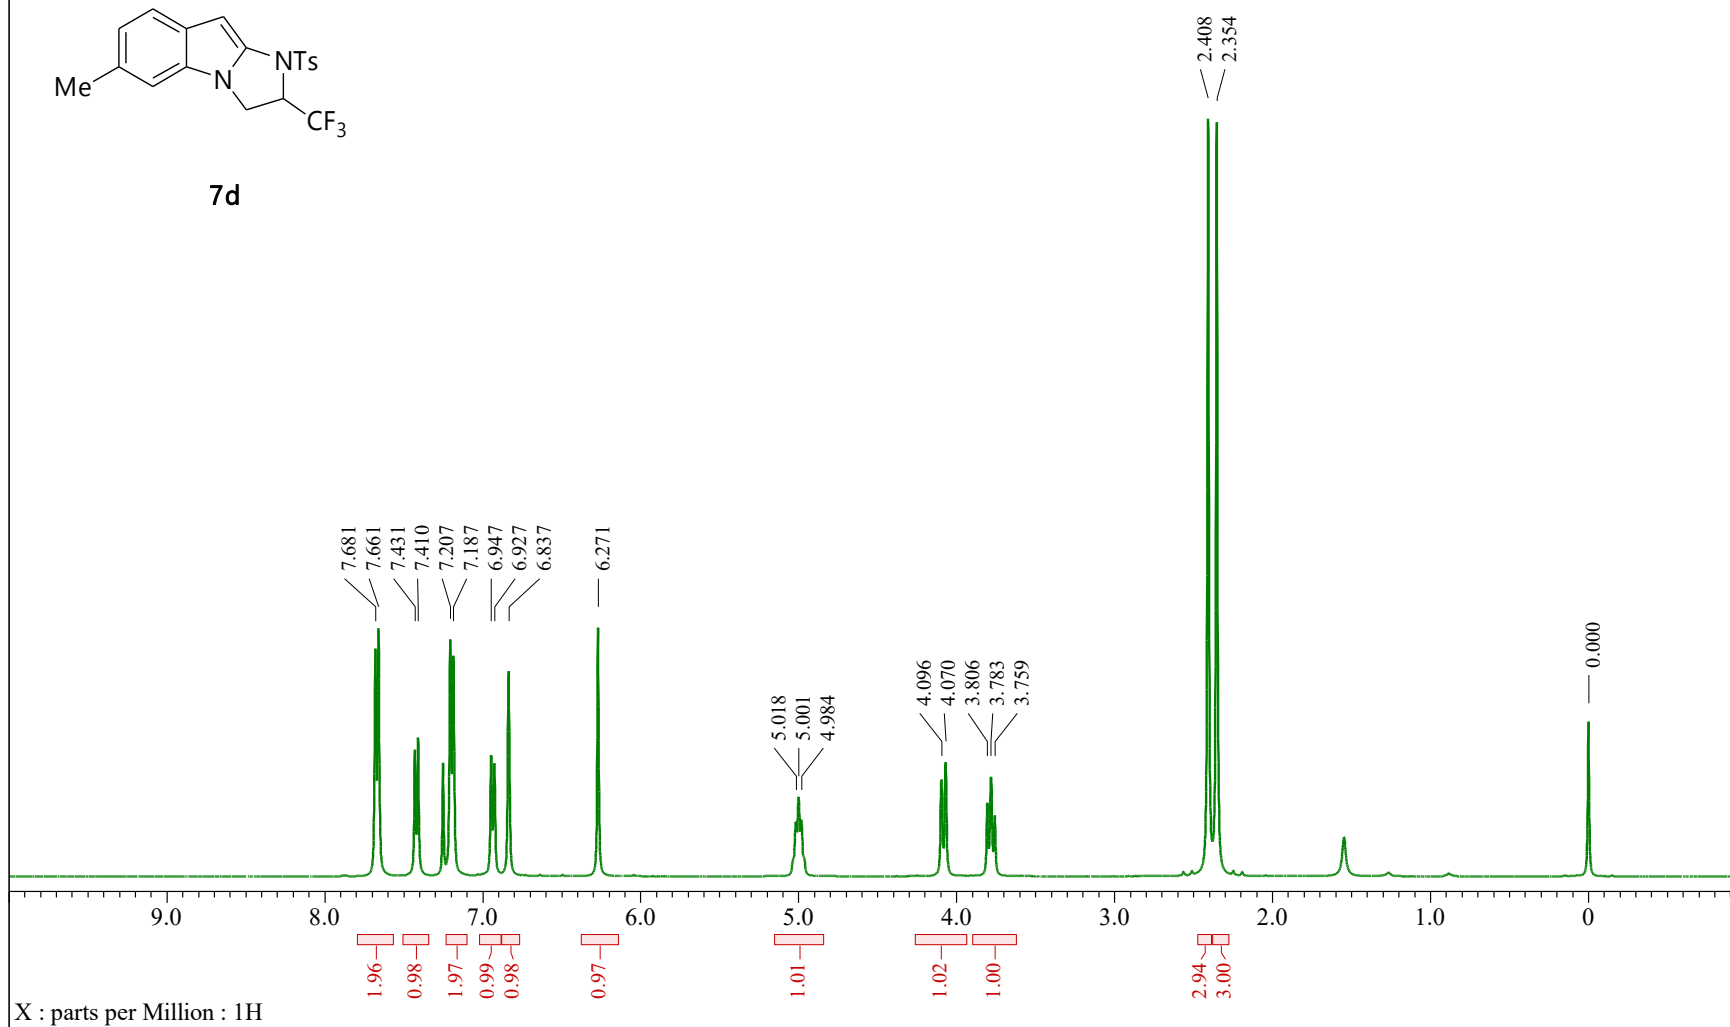

<sup>13</sup>C

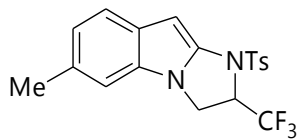

7d

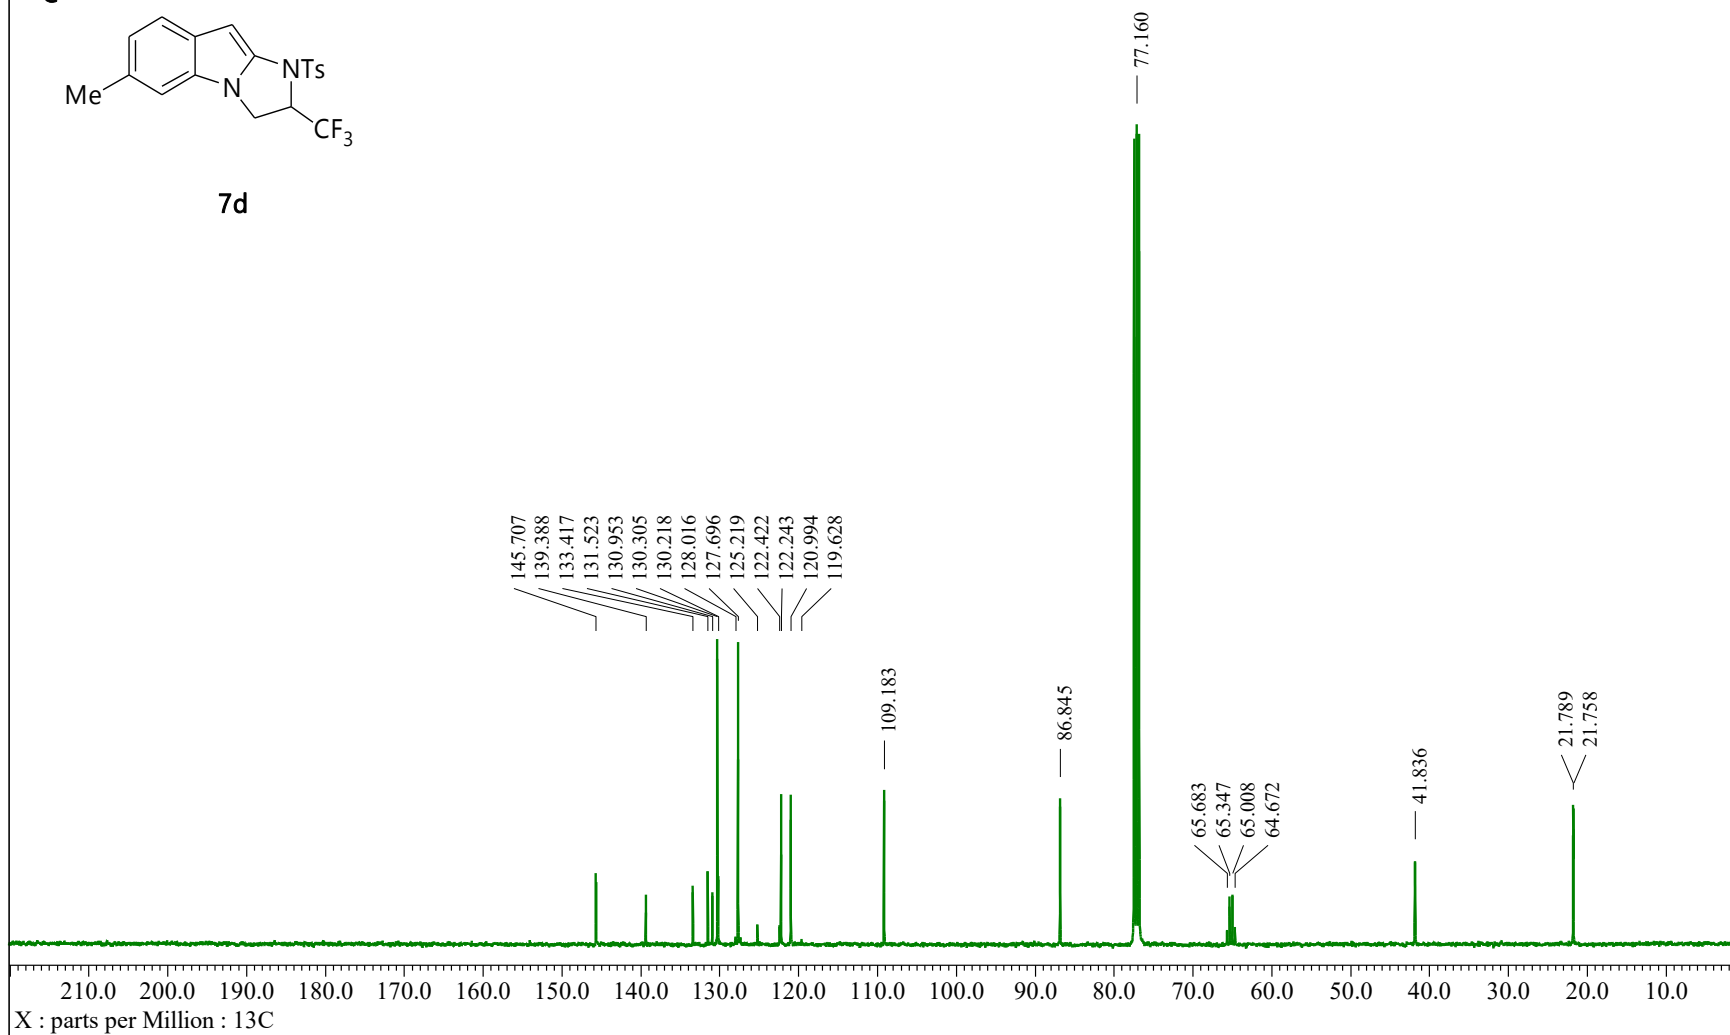

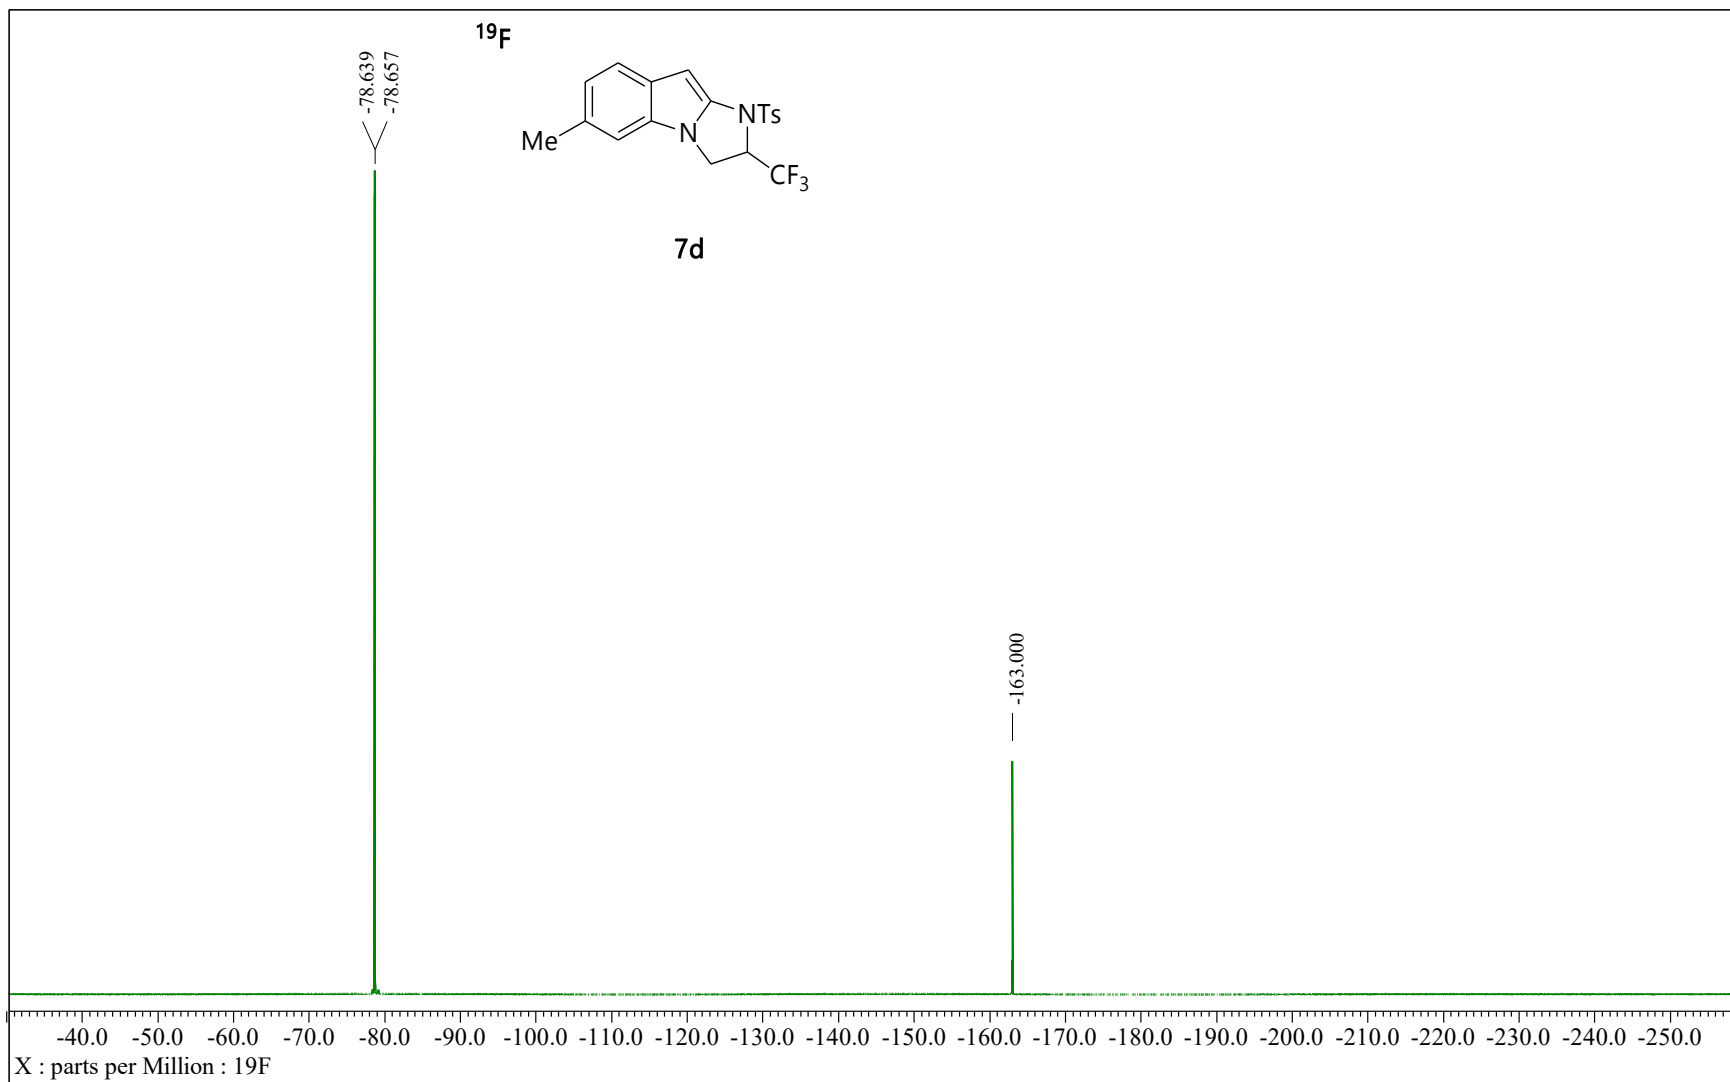

<sup>1</sup>H

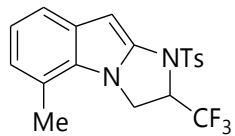

7e

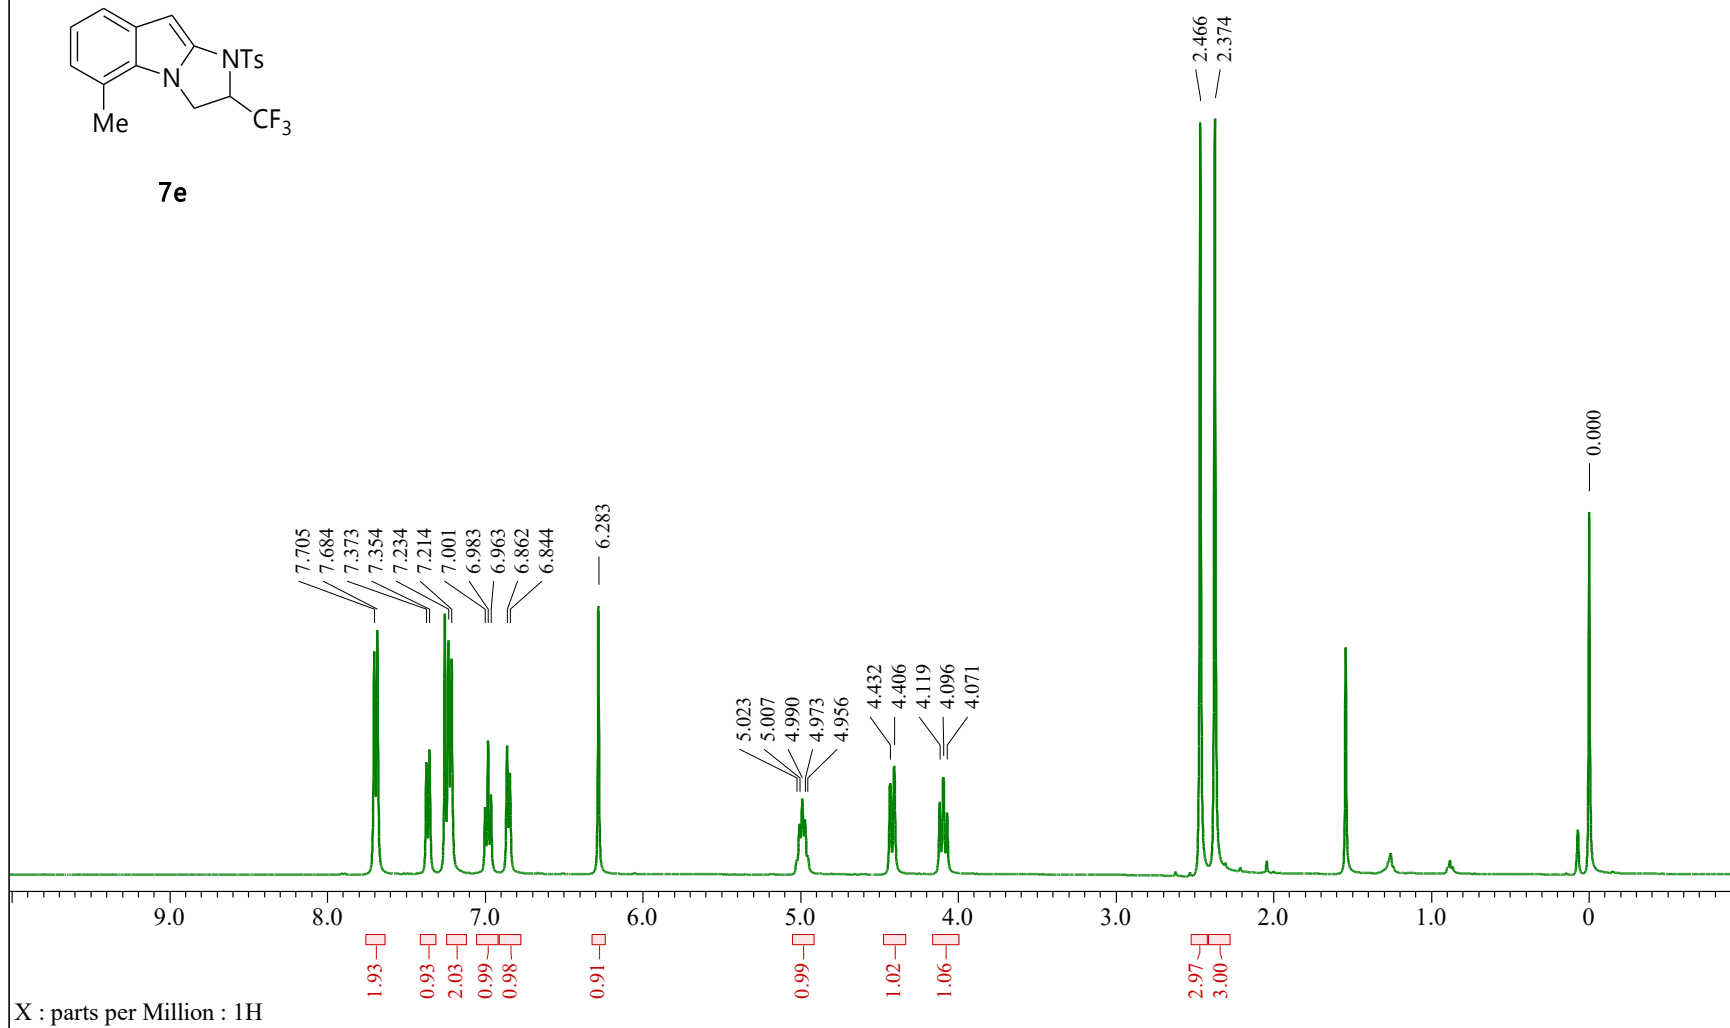

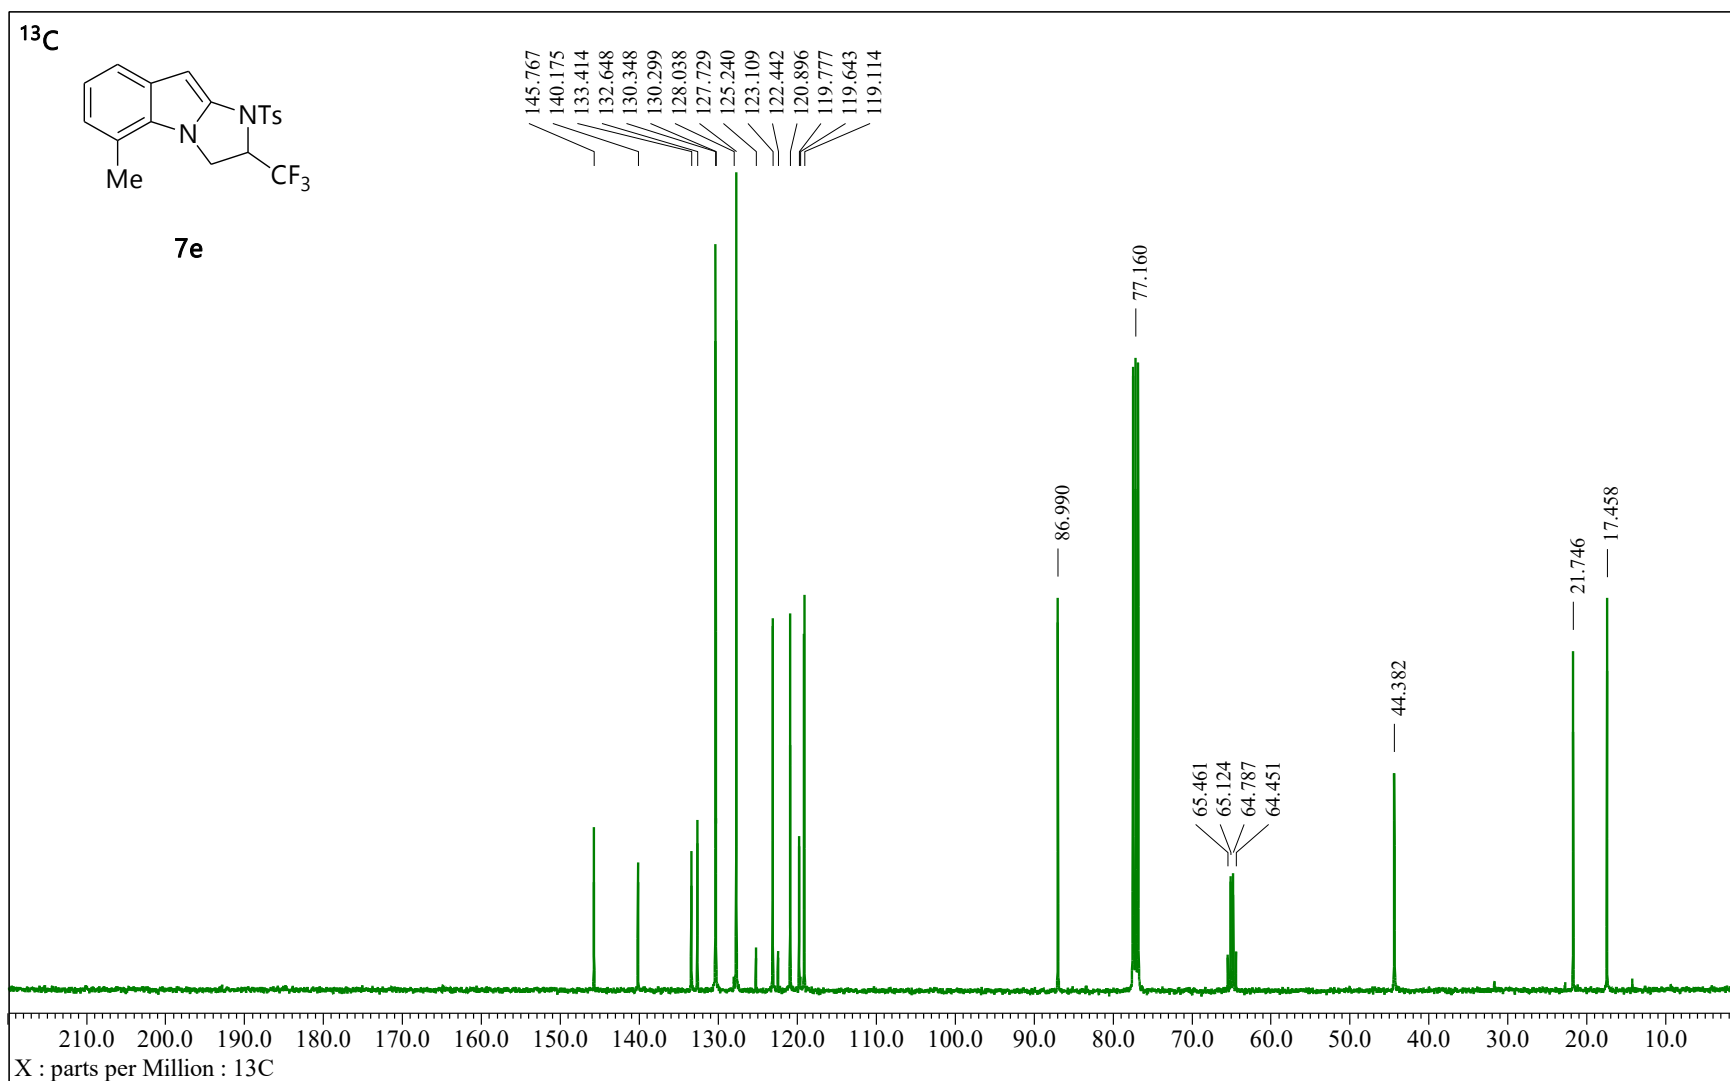

<sup>19</sup>F

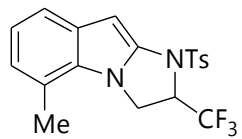

7e

-78.536  
-78.554

-163.000

X : parts per Million : <sup>19</sup>F



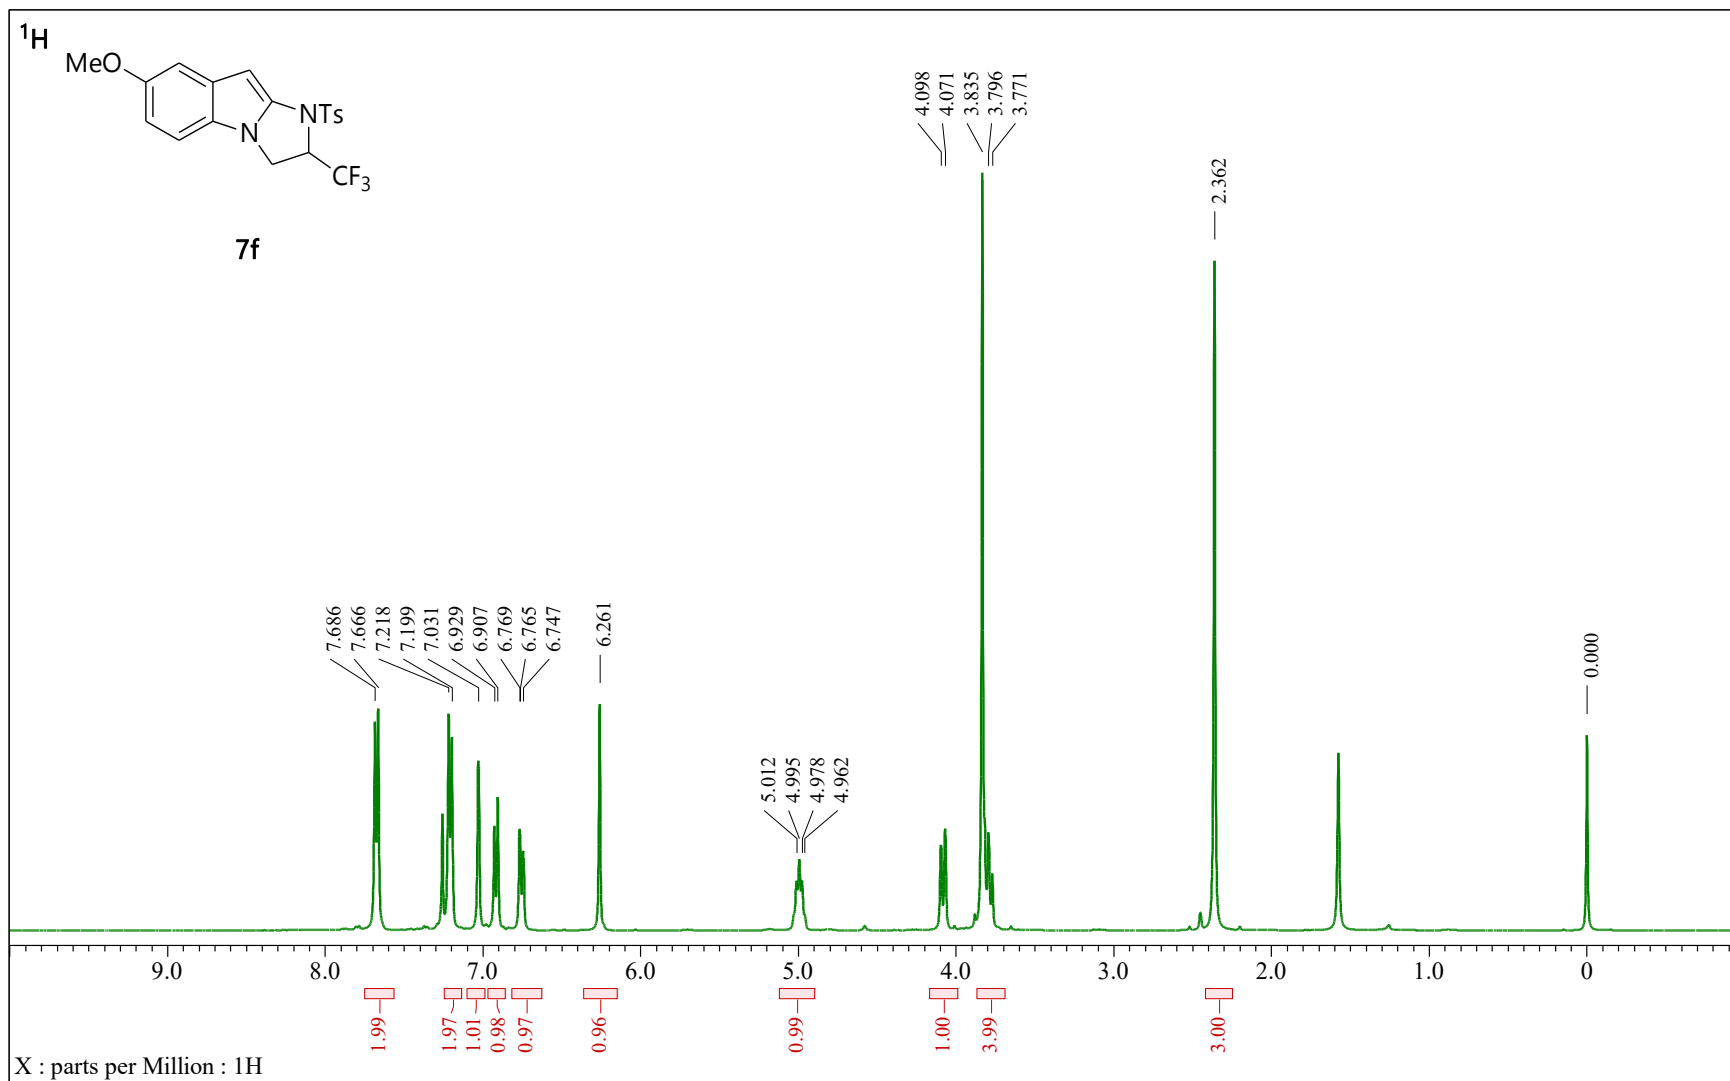

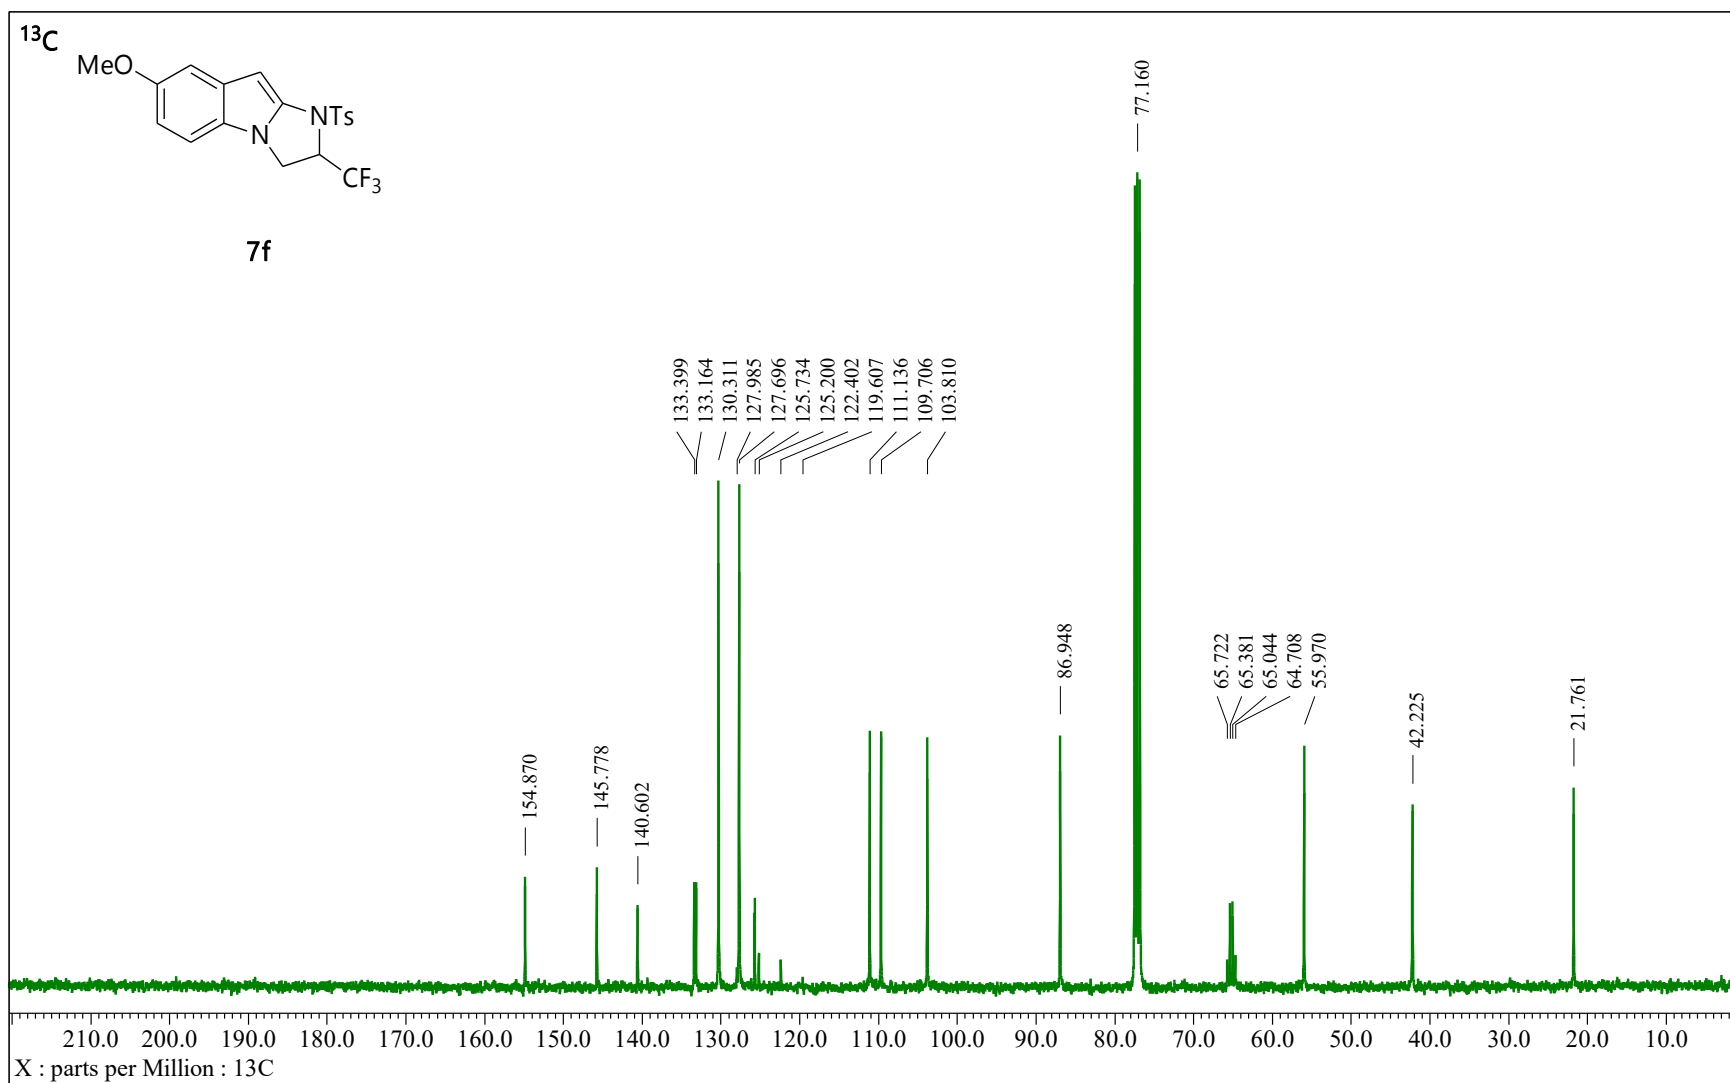

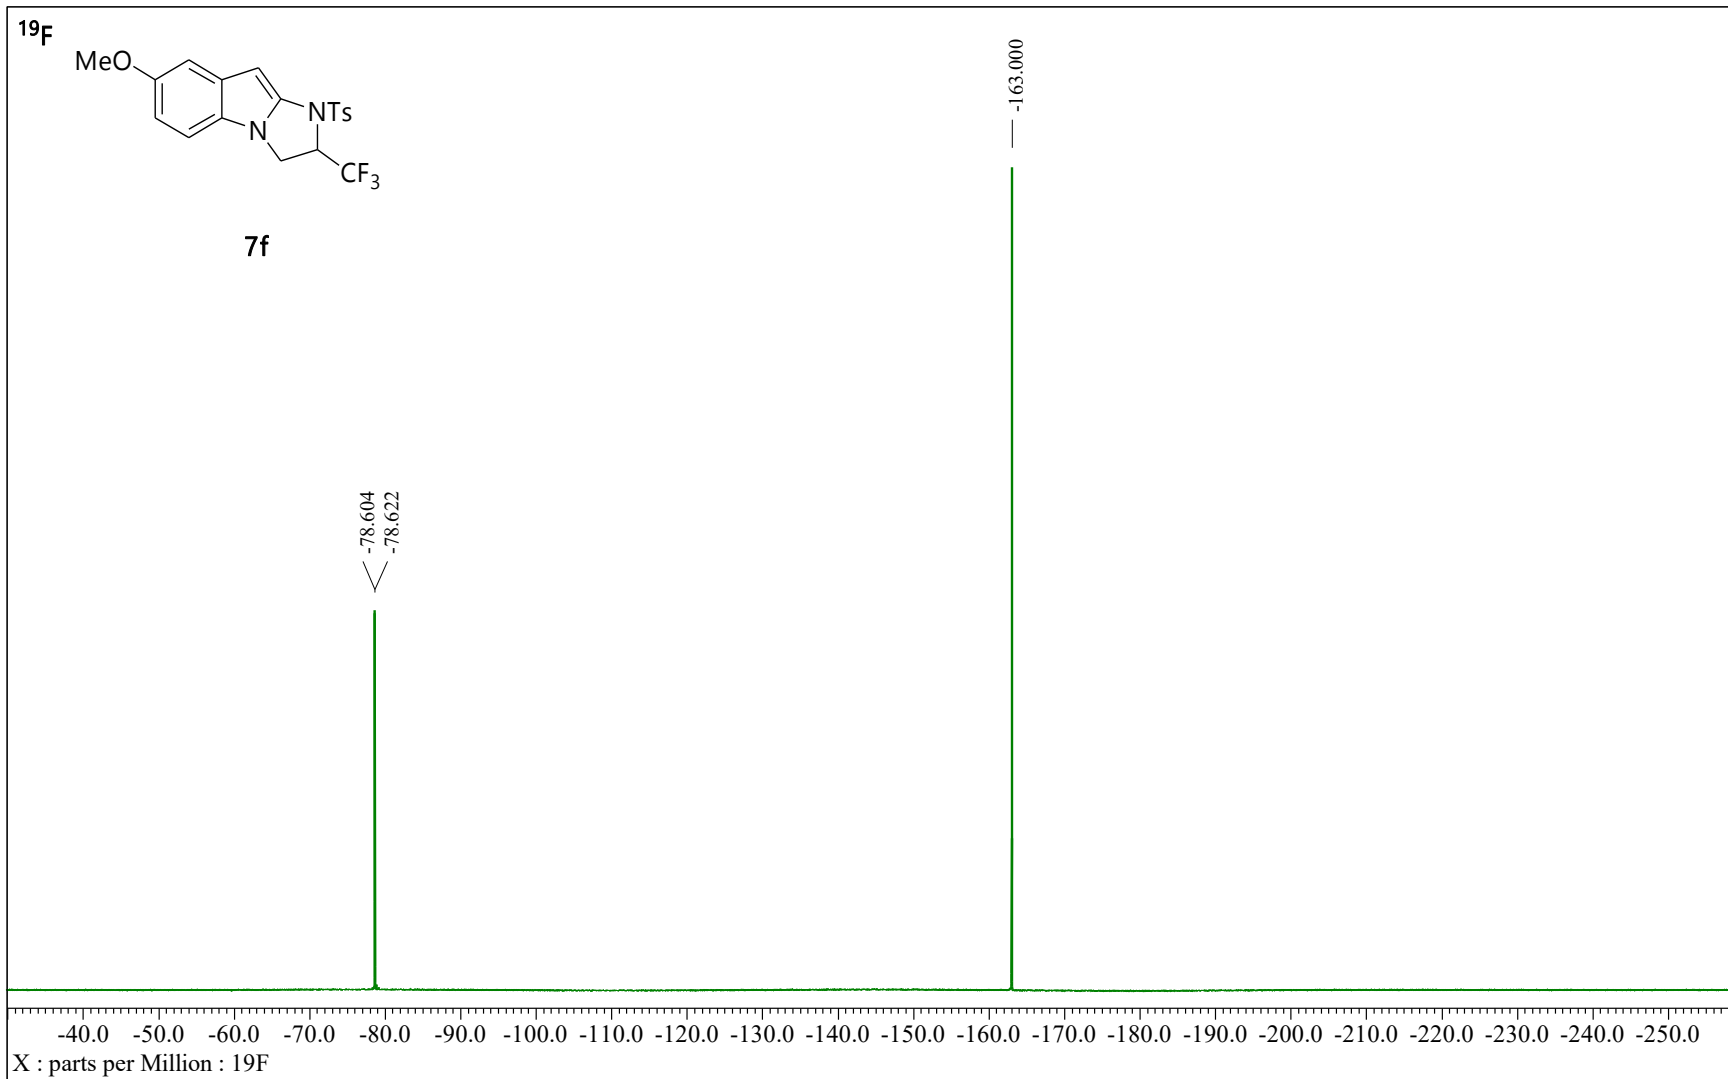

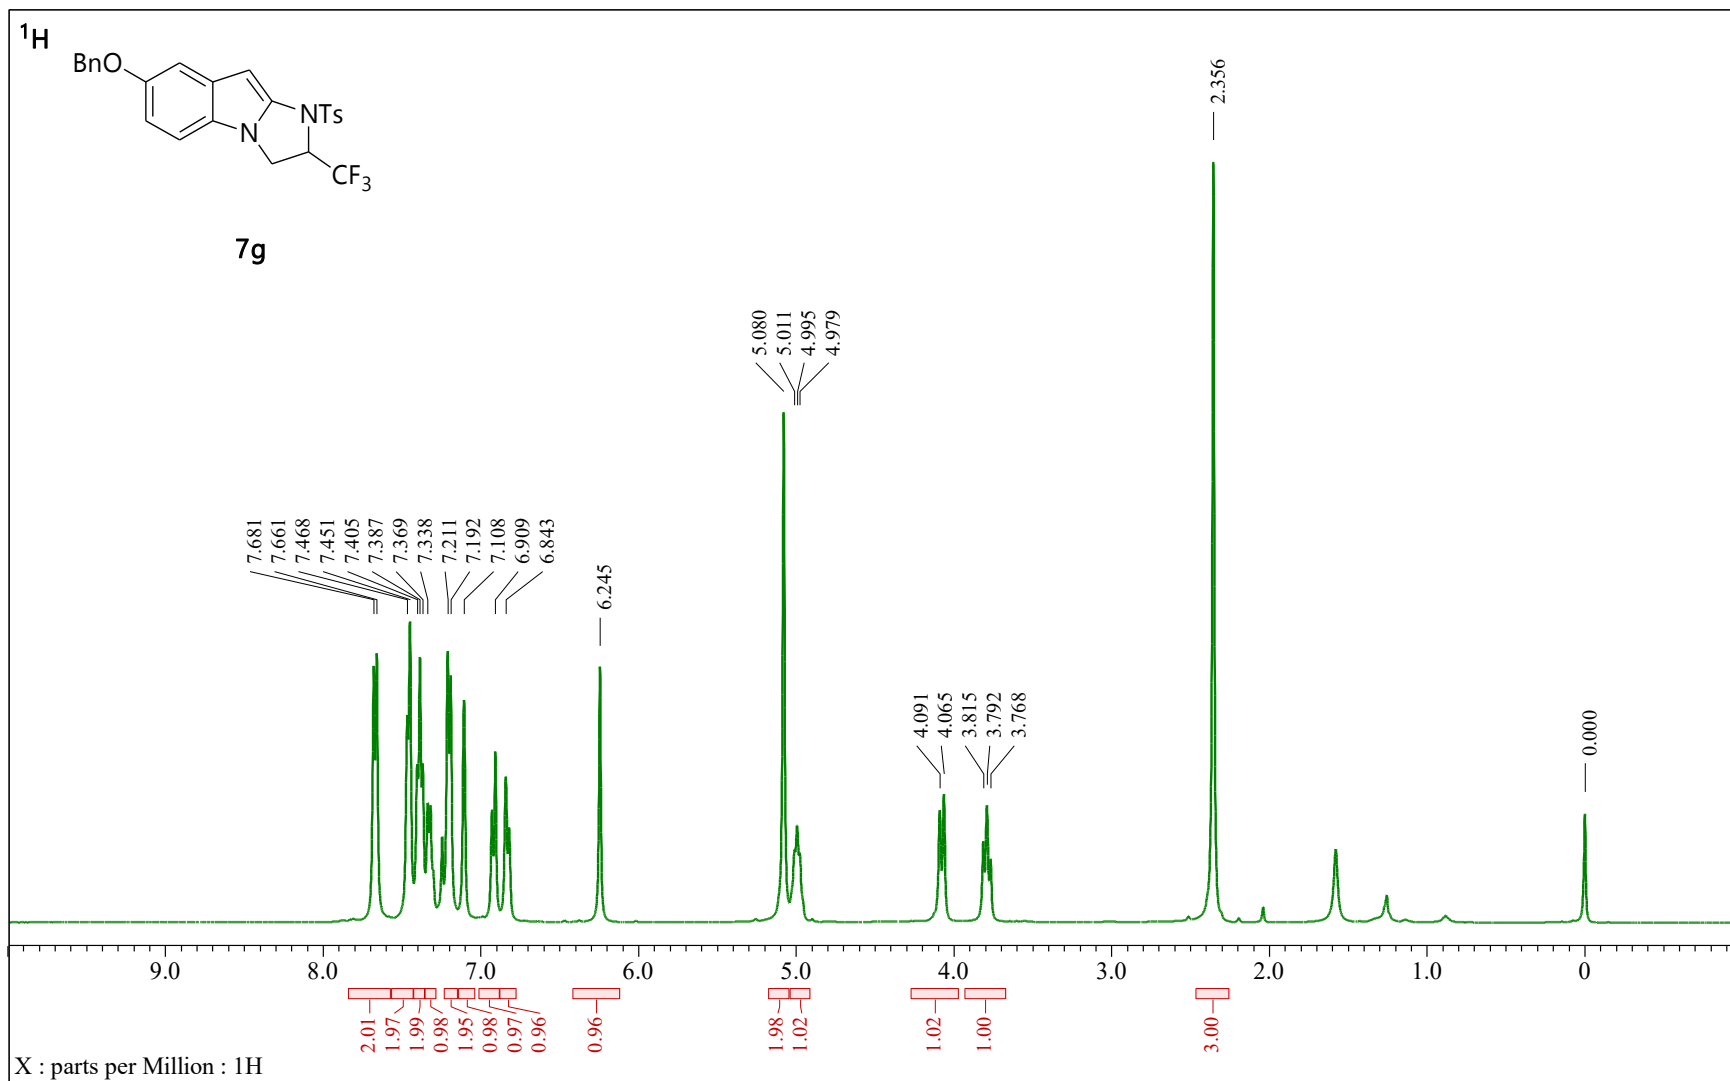

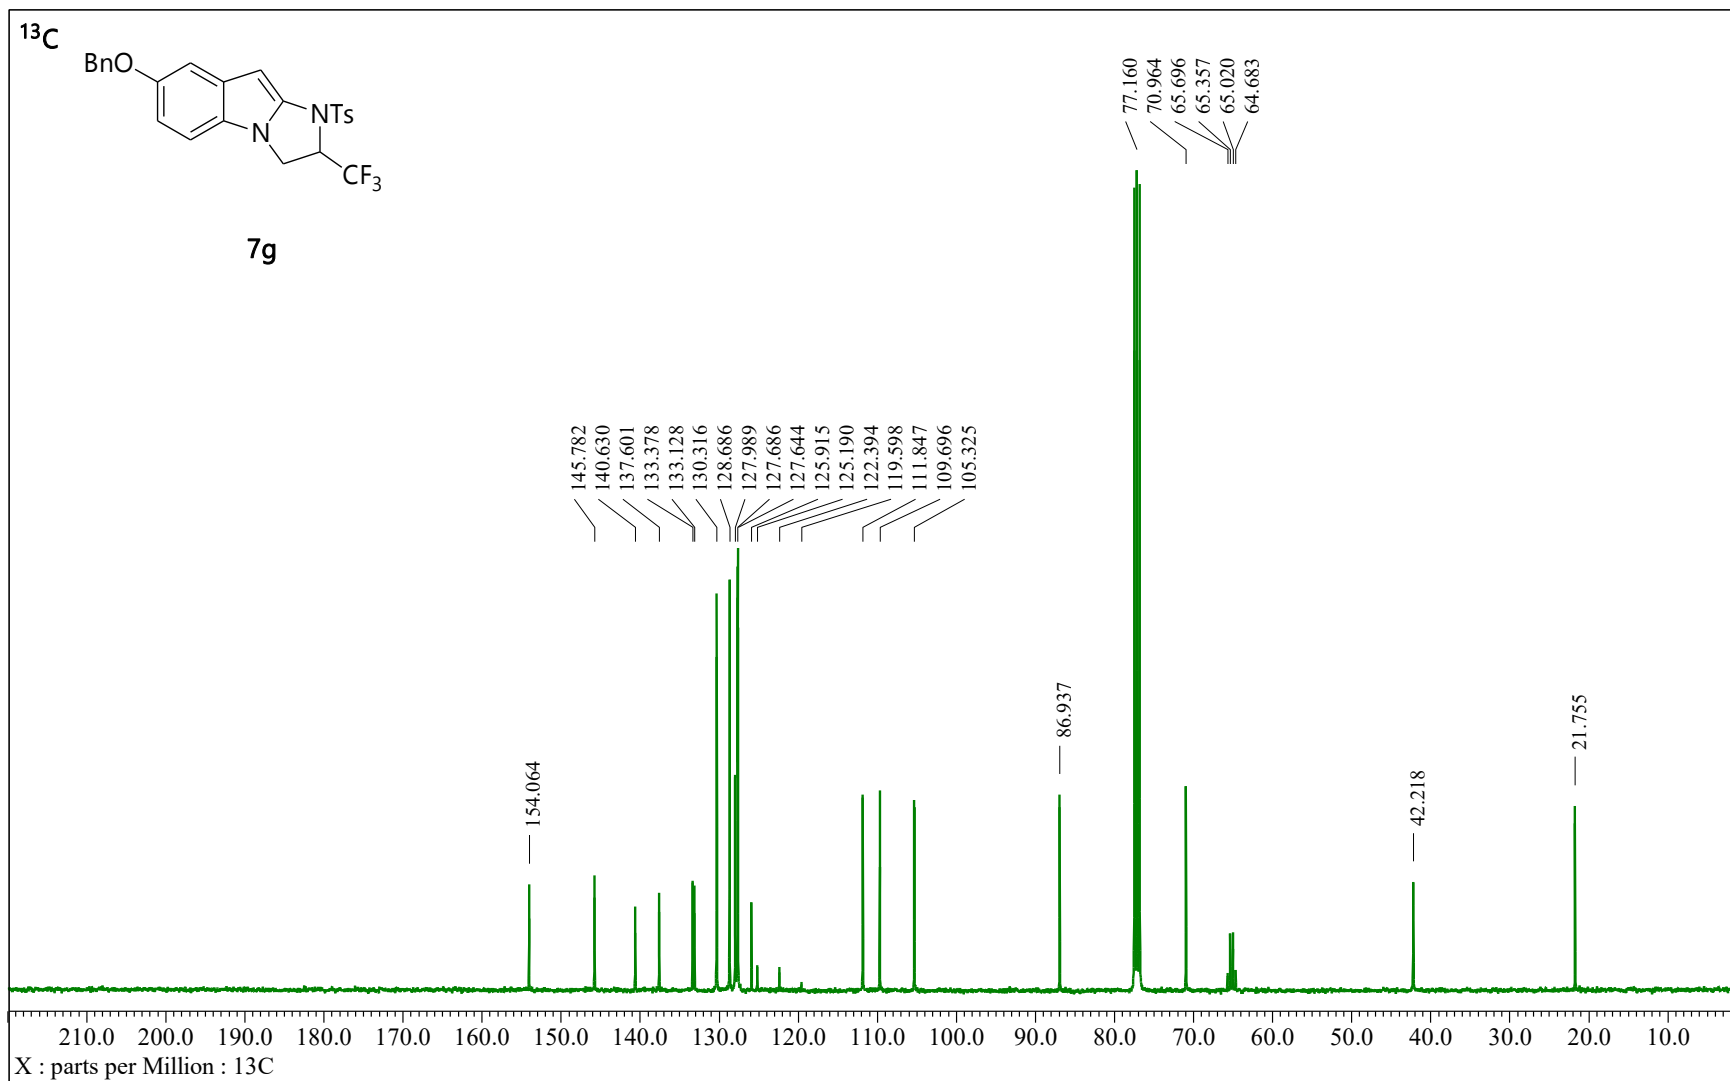

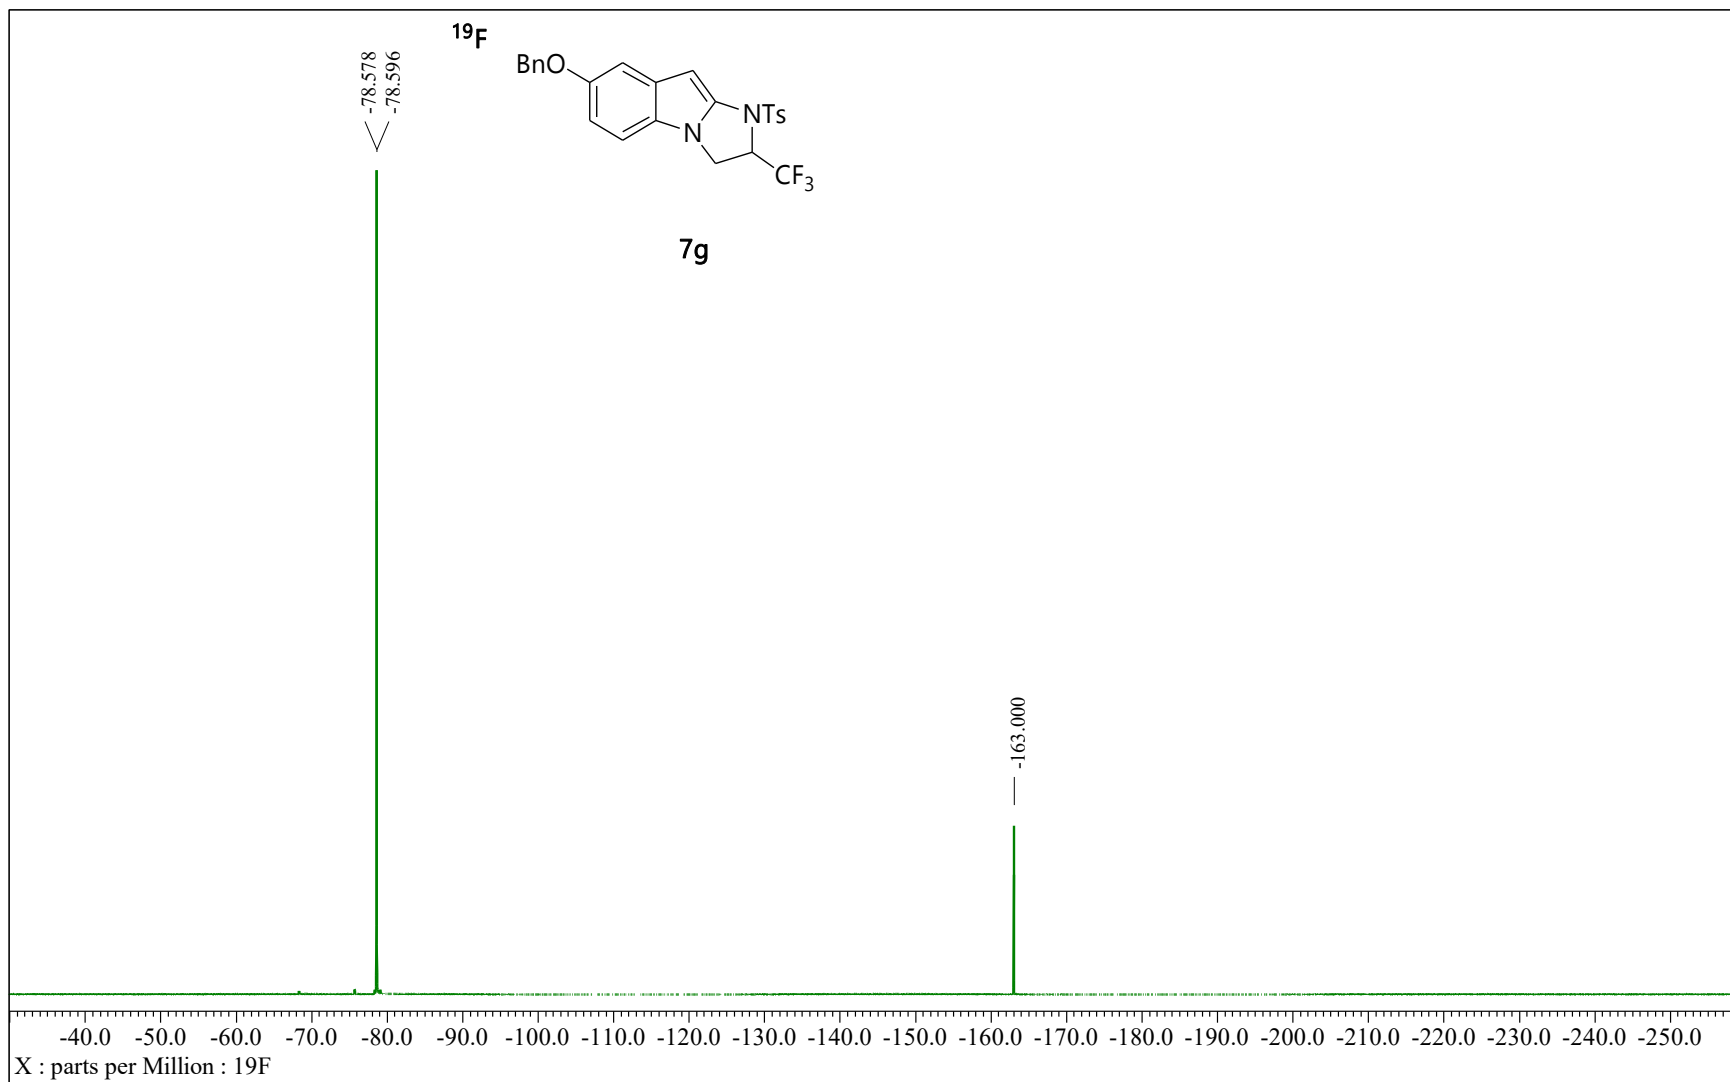

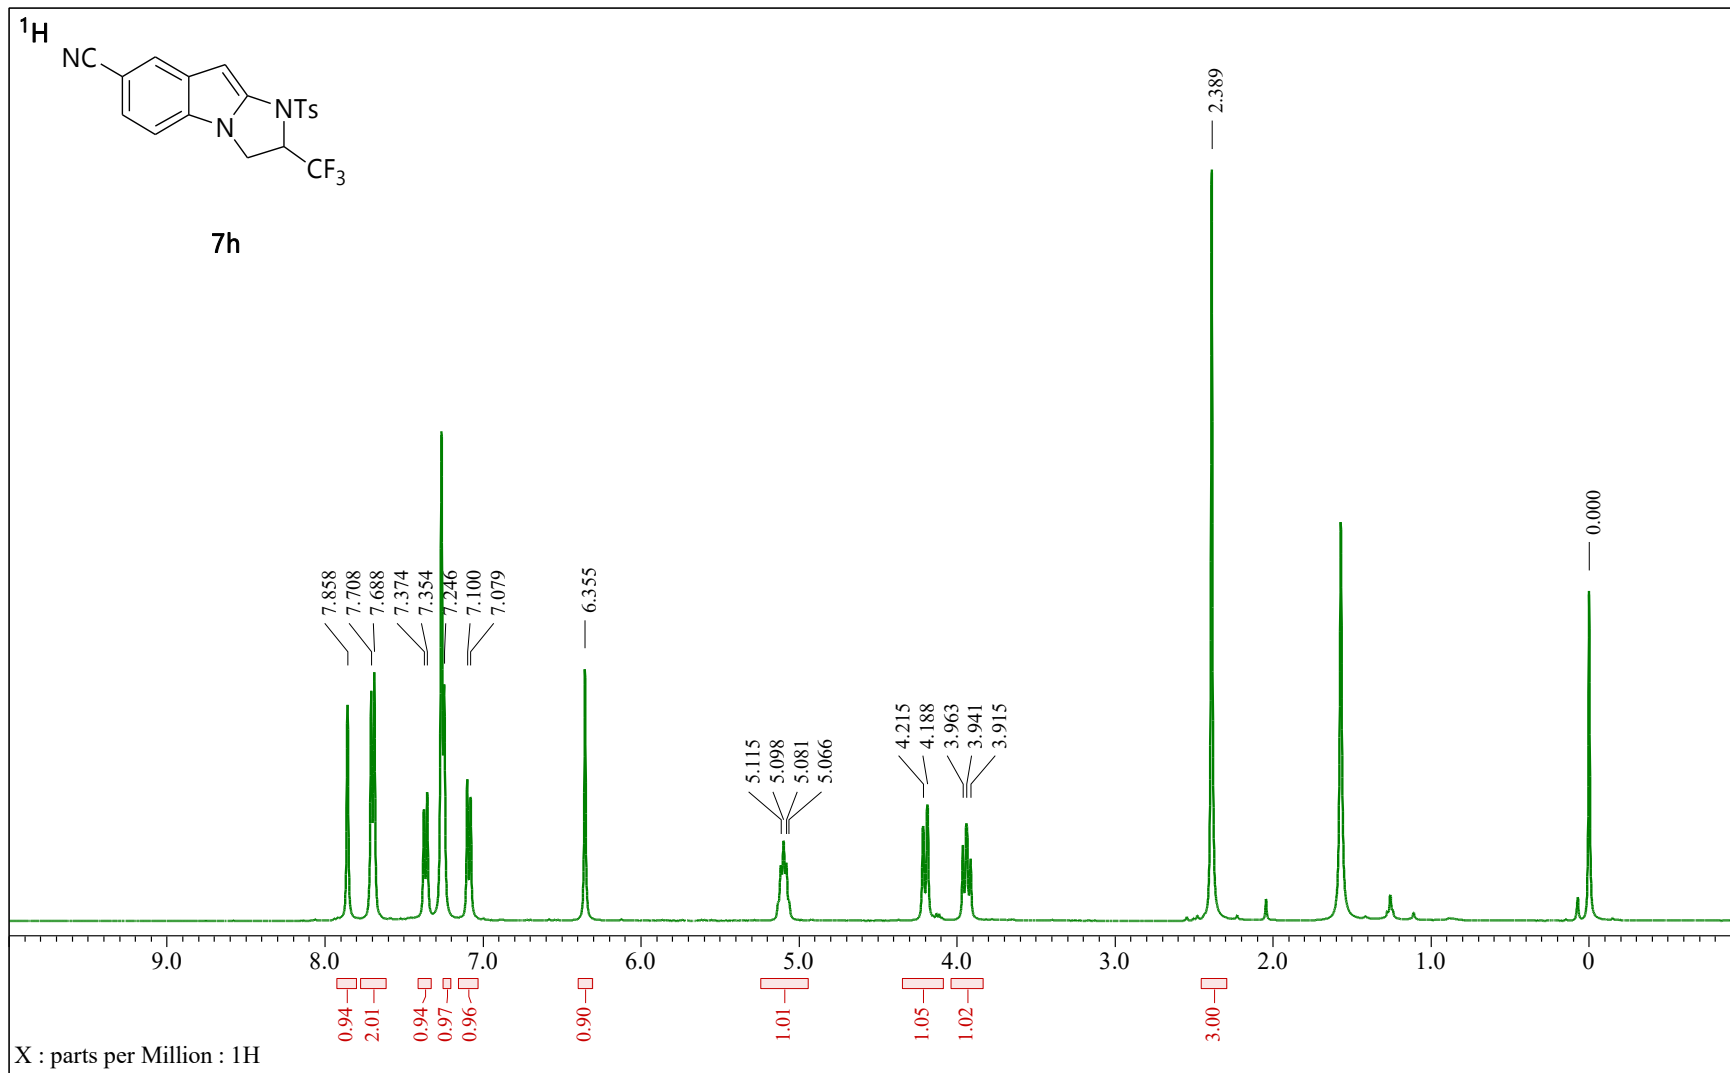

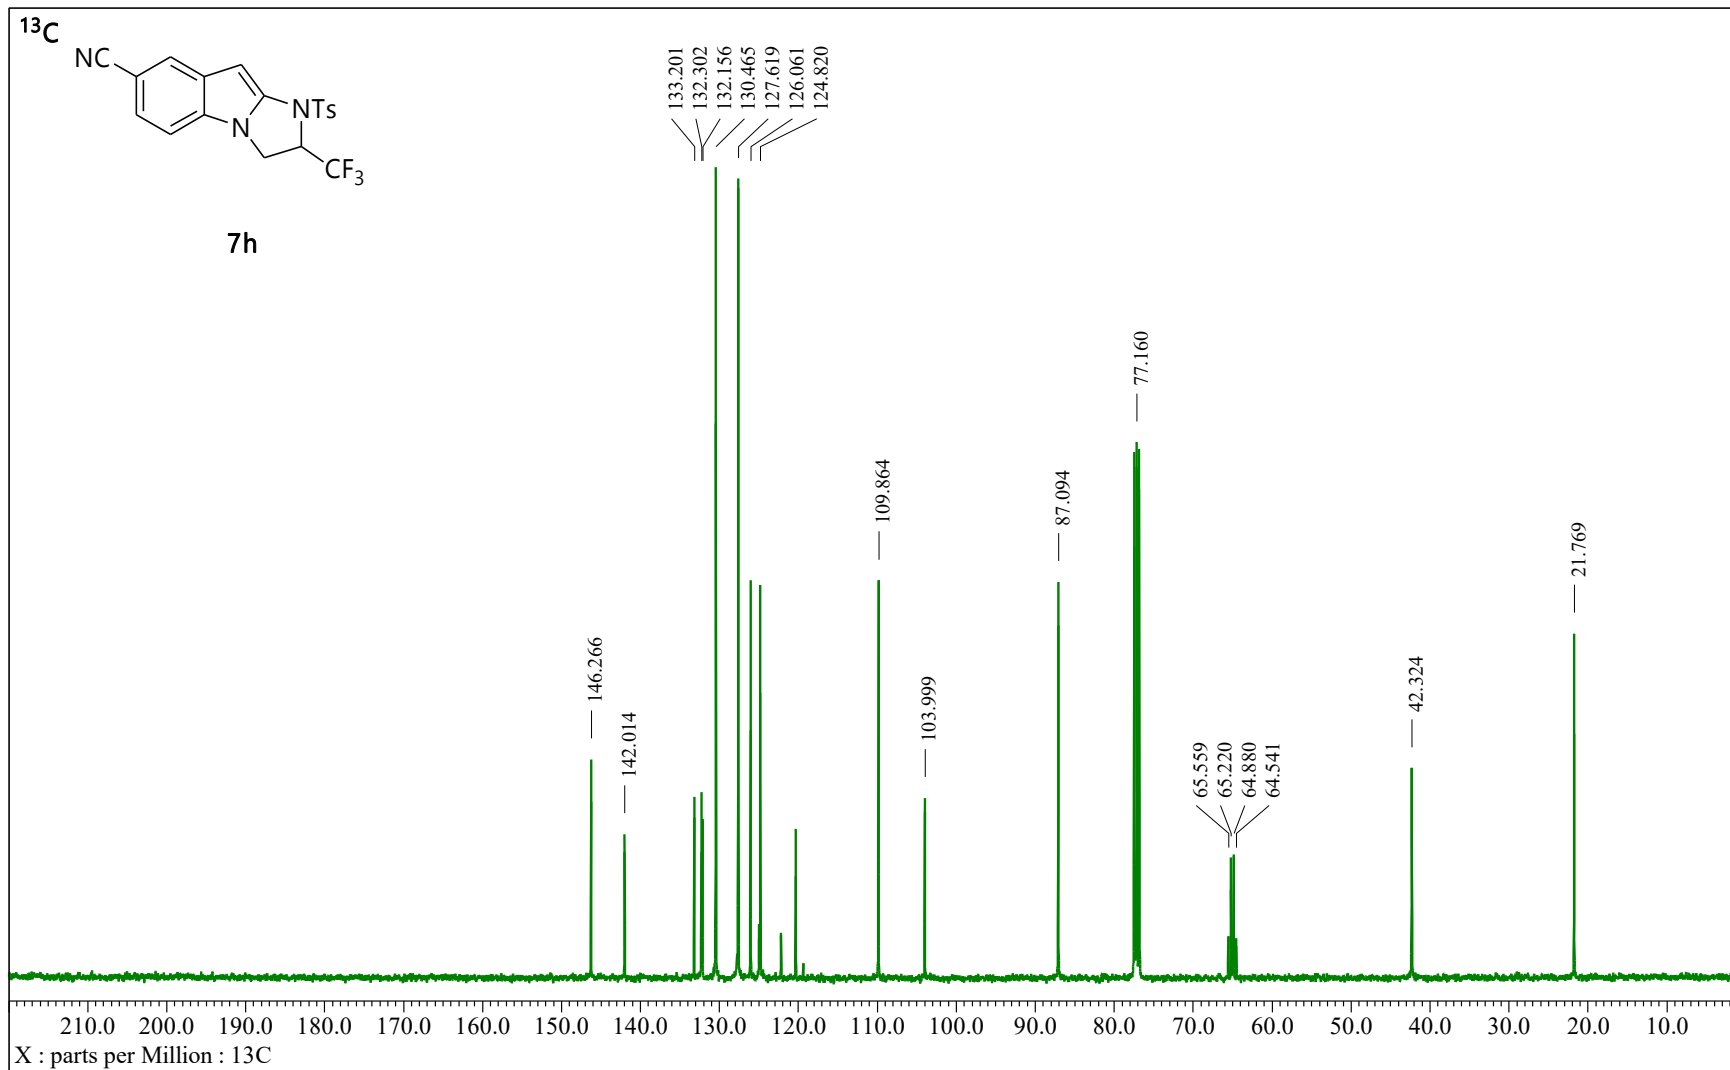



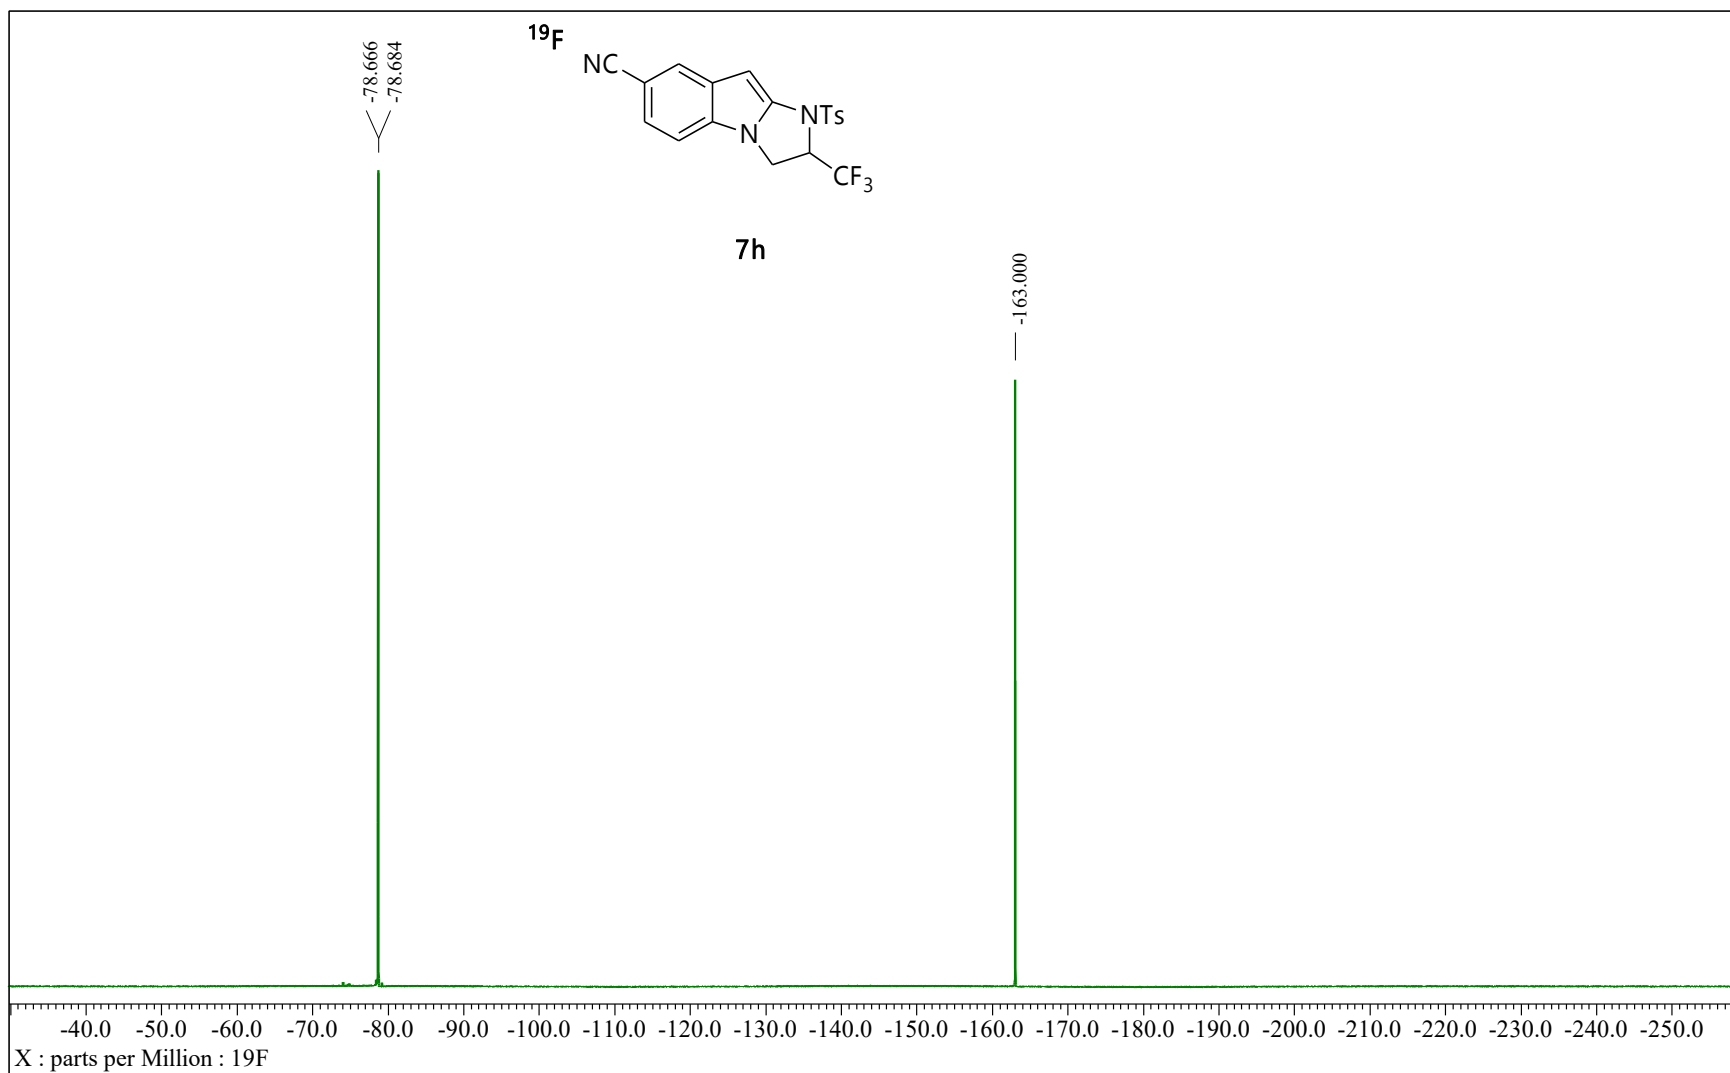

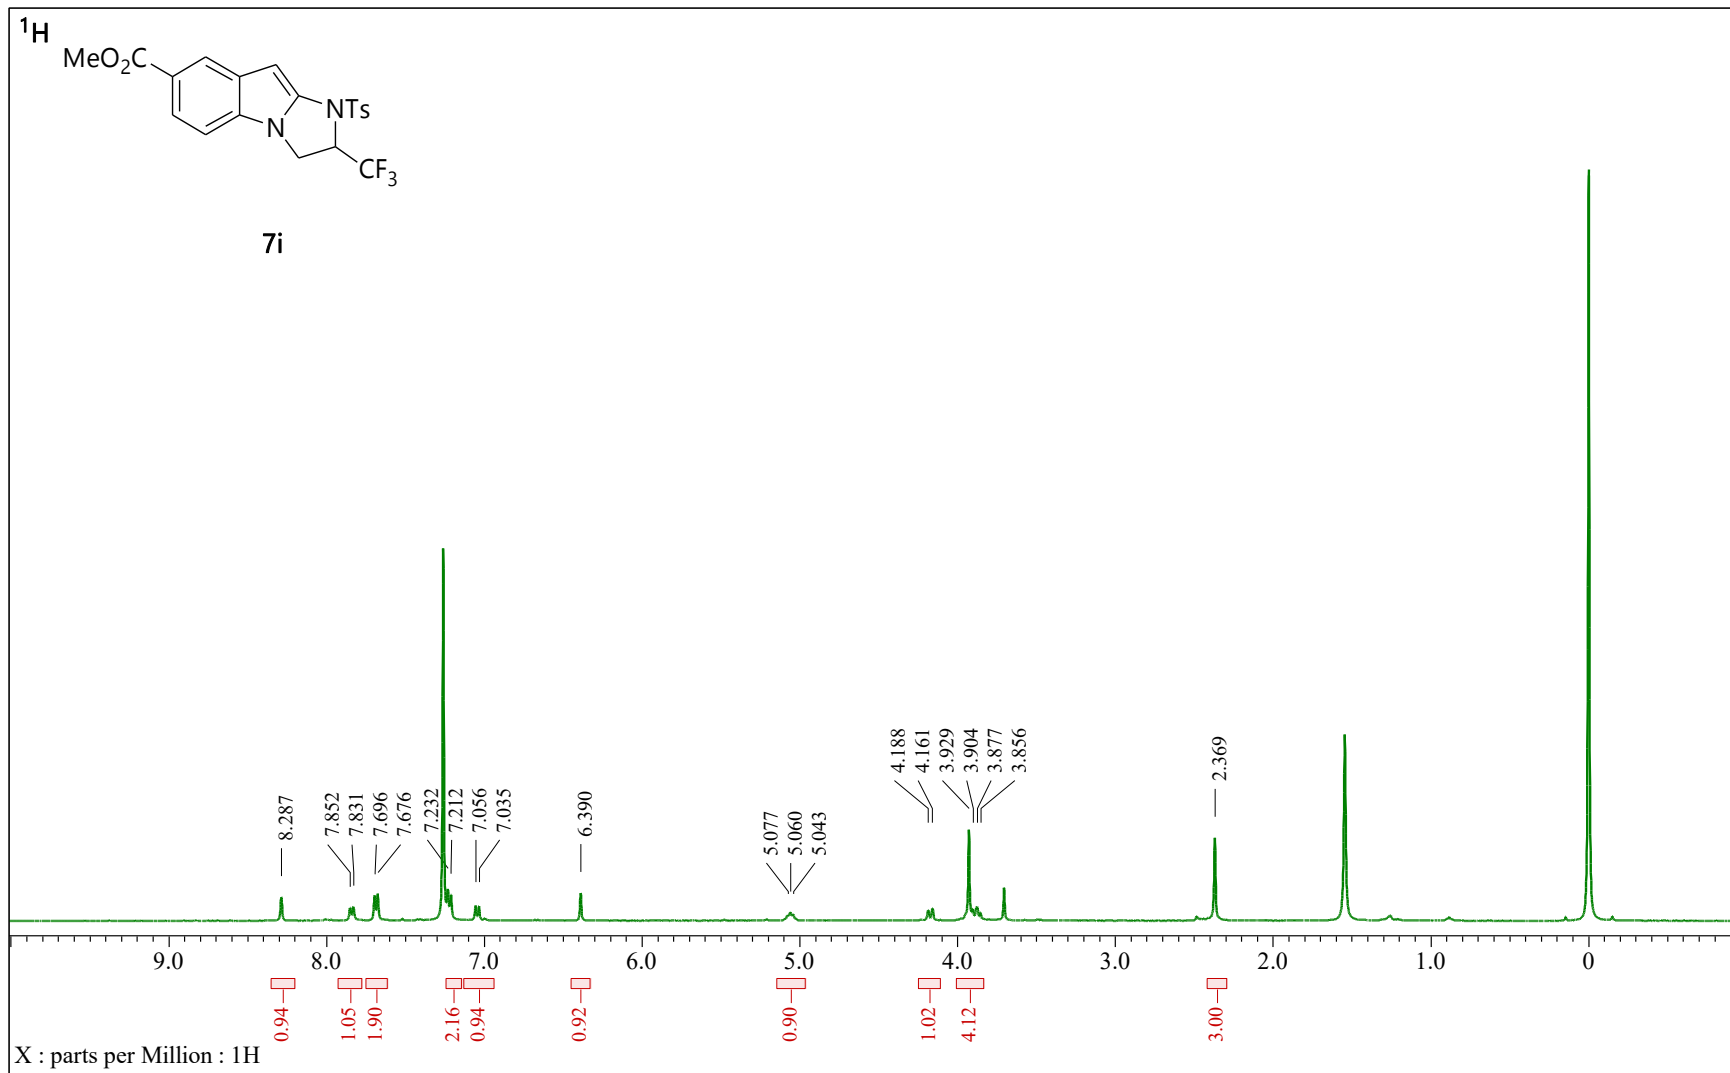

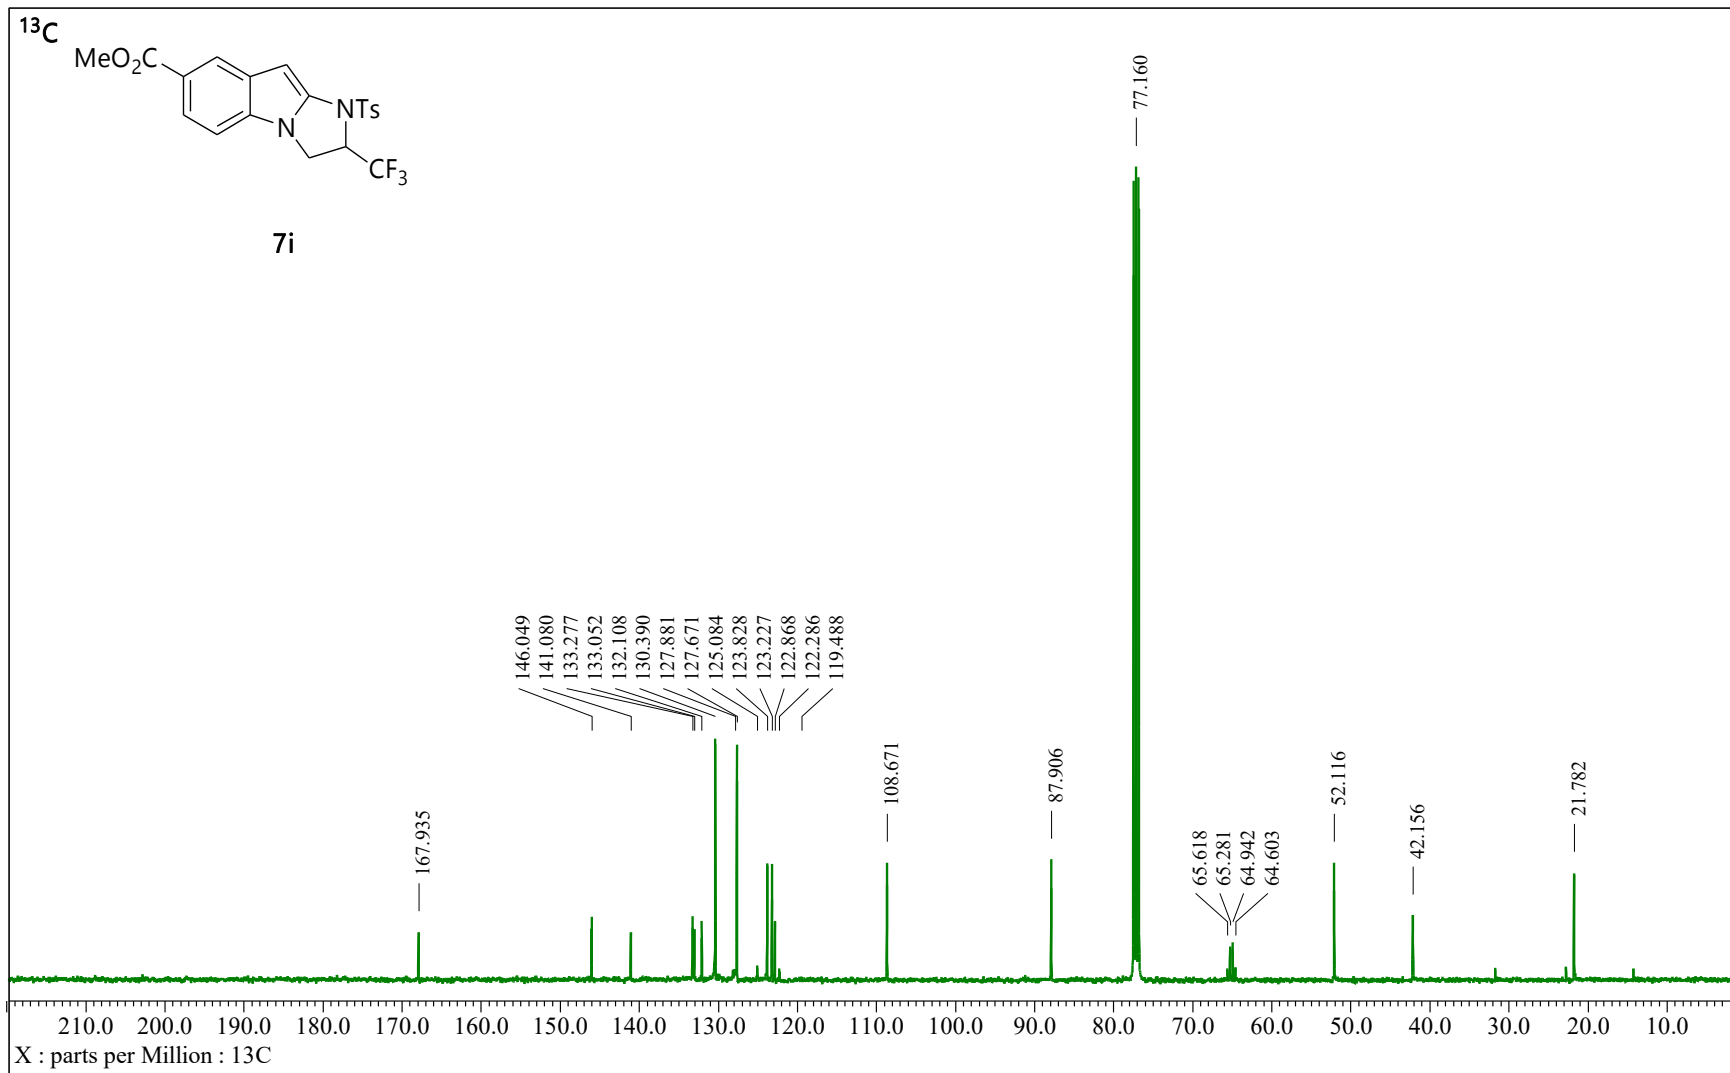

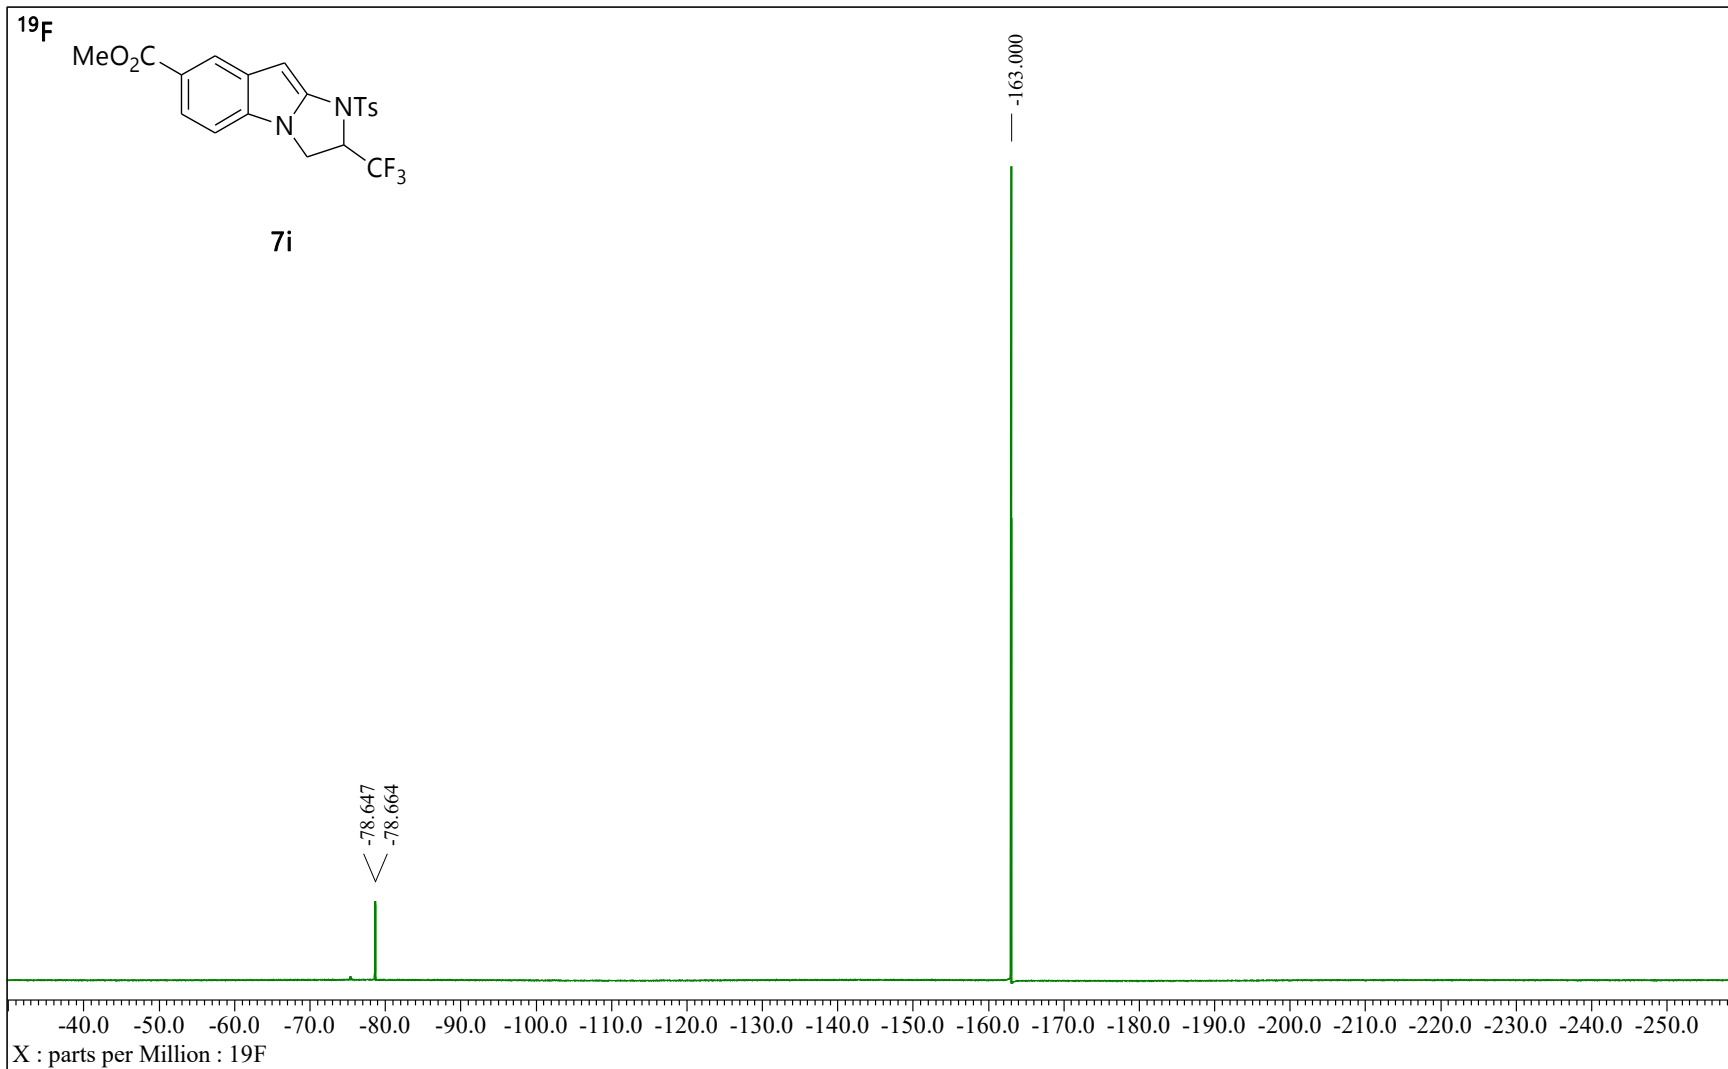

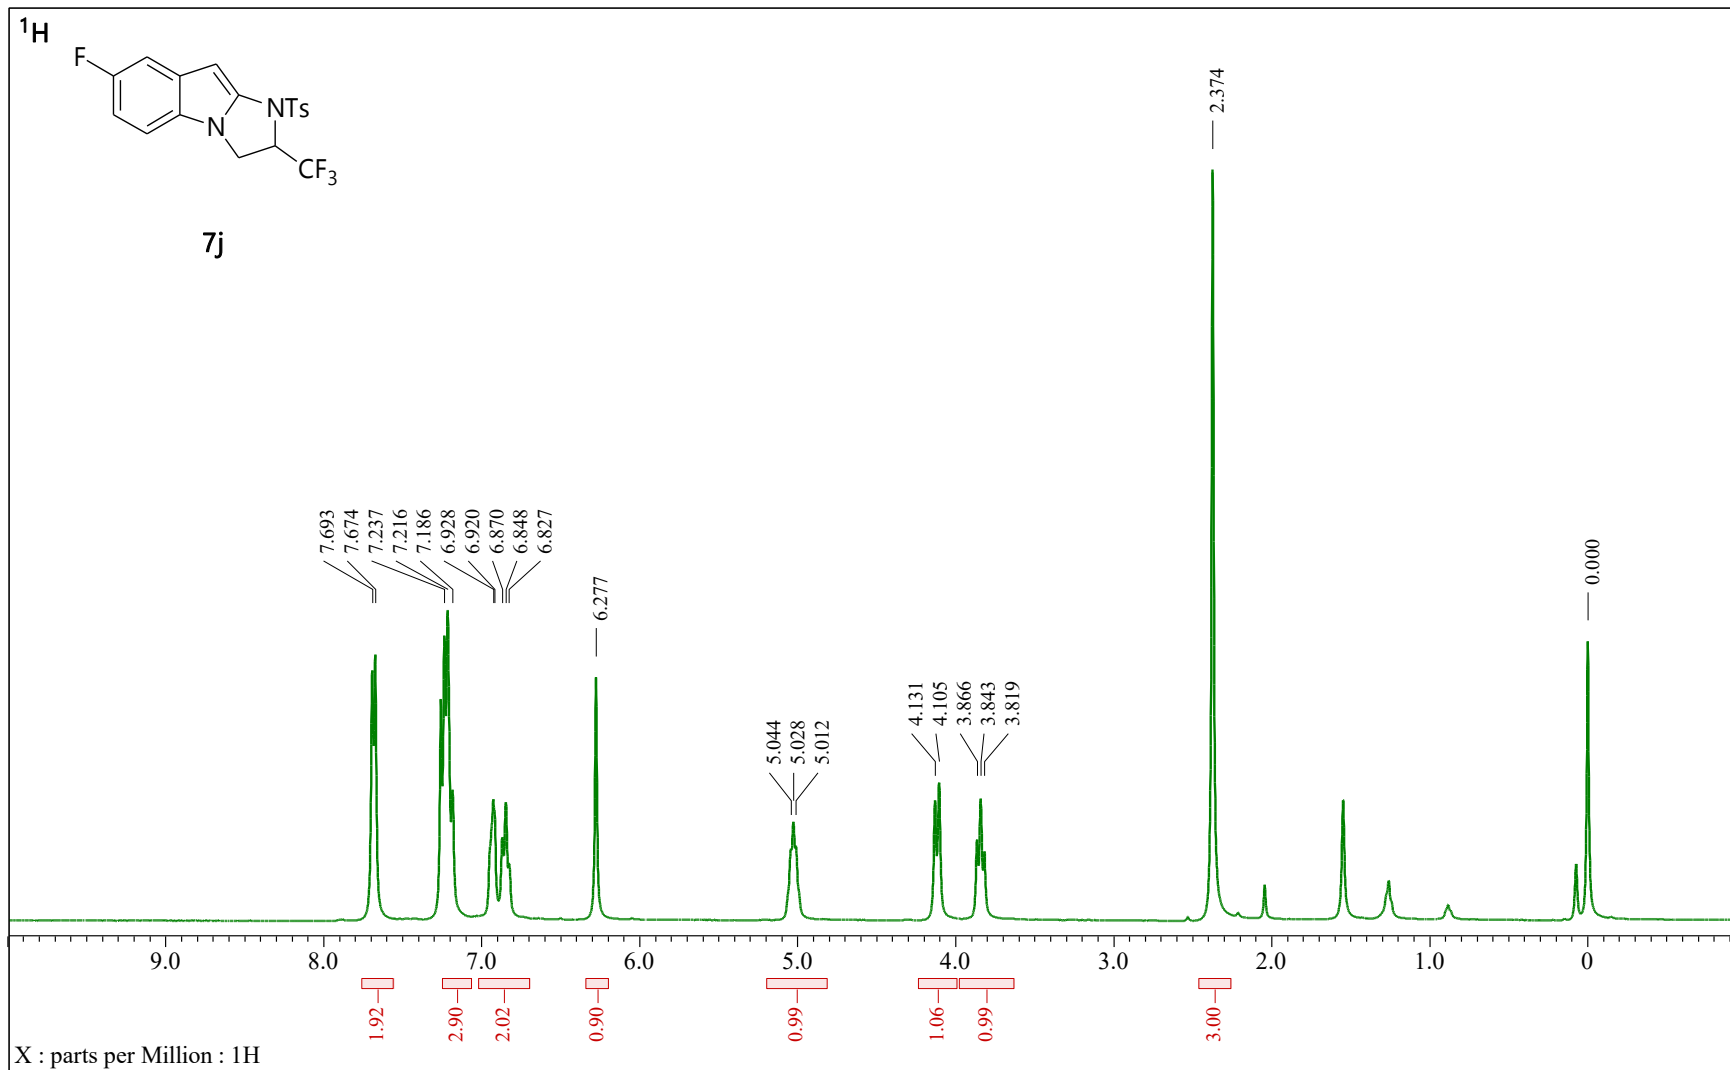

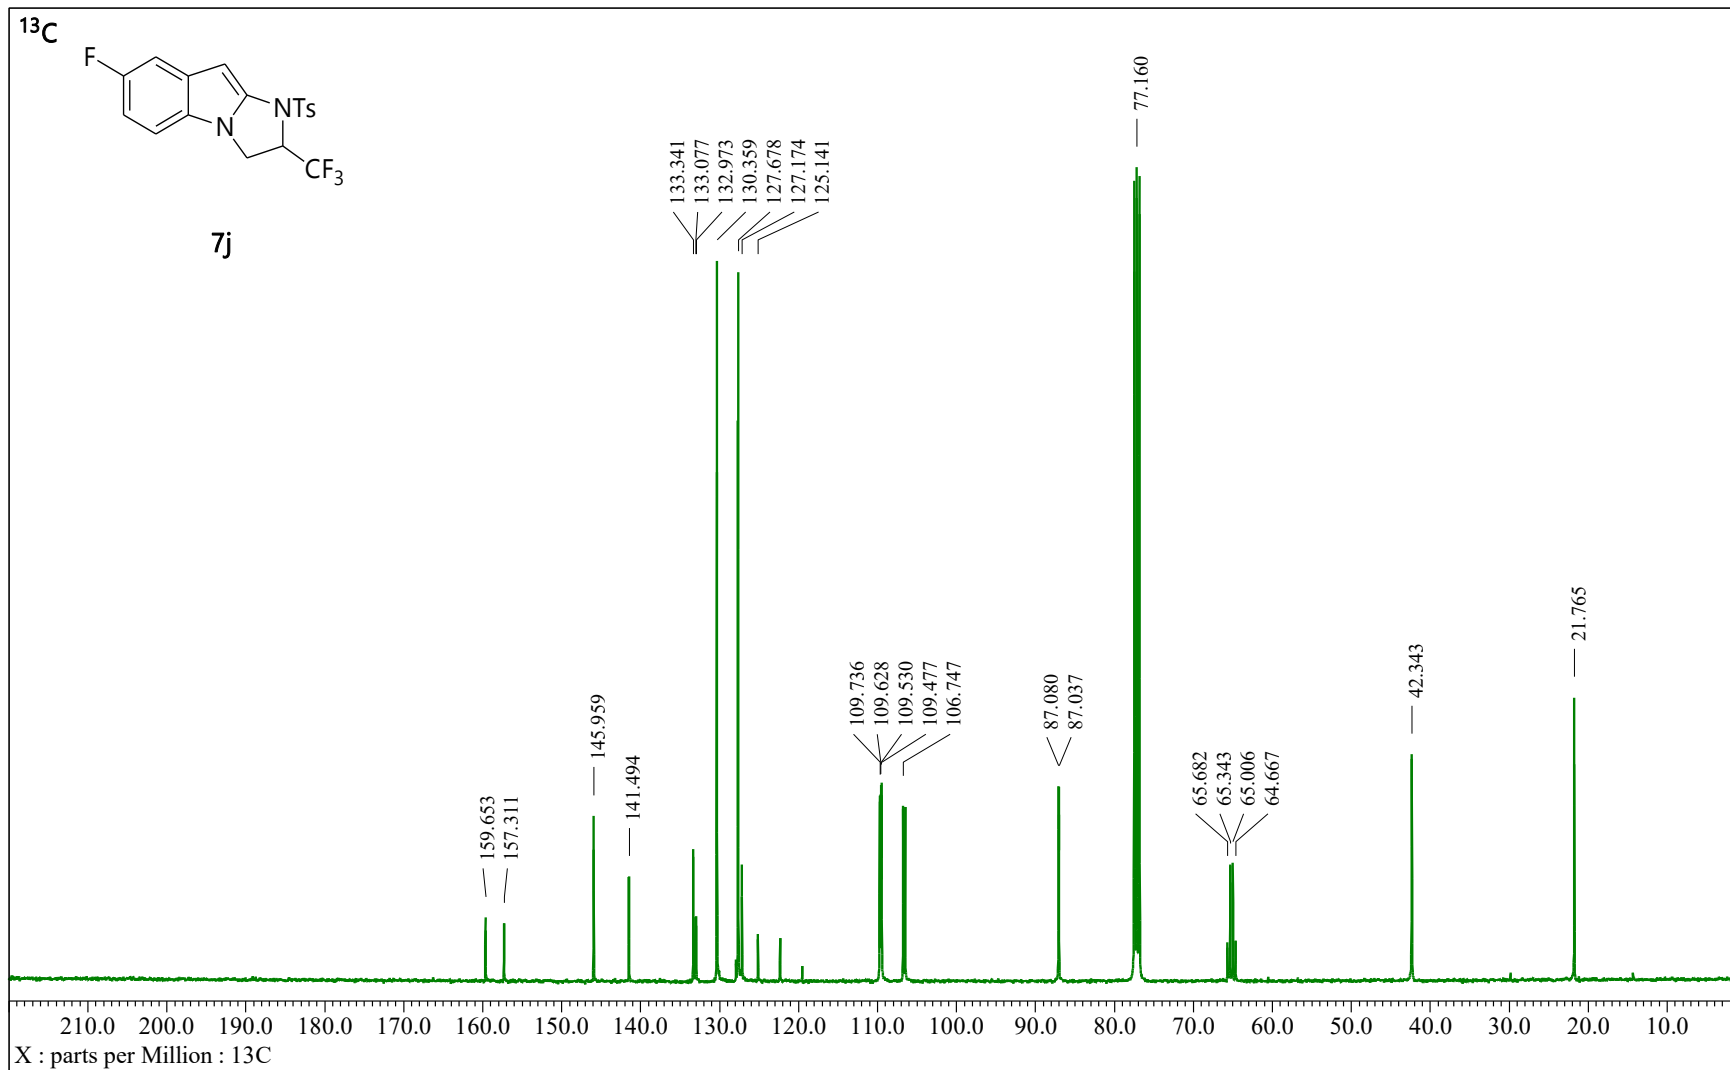

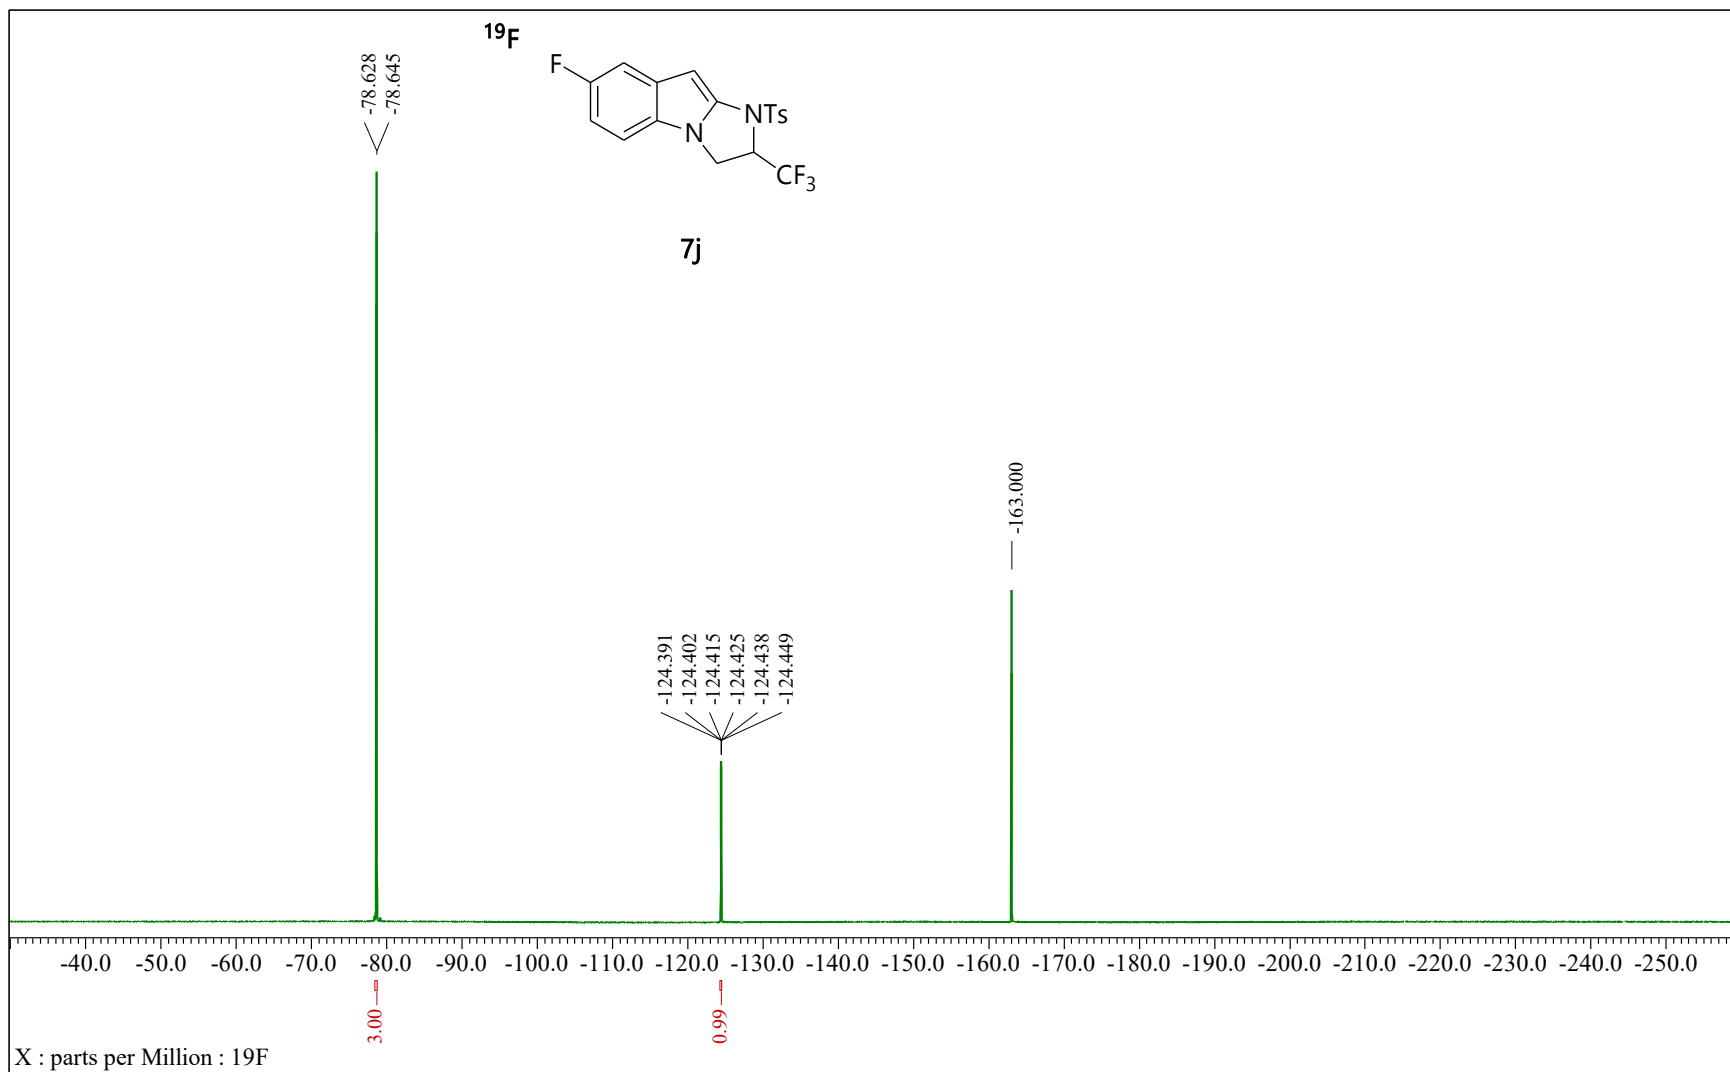

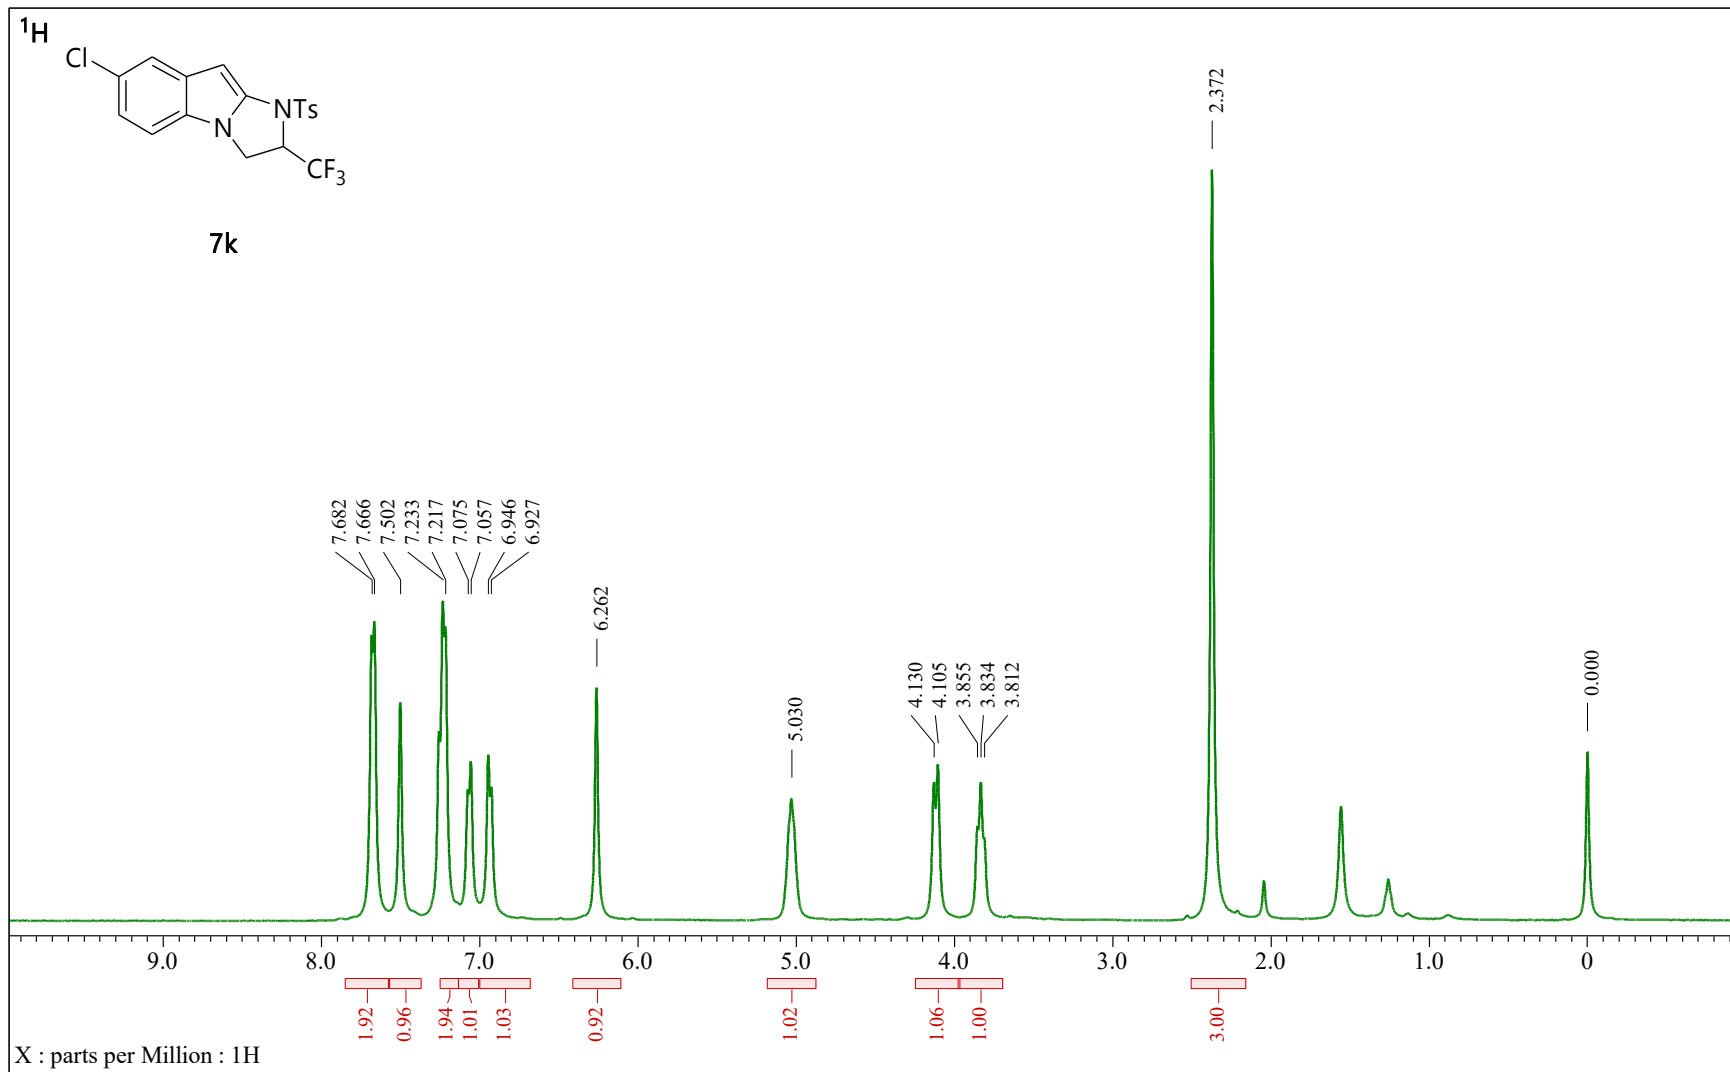



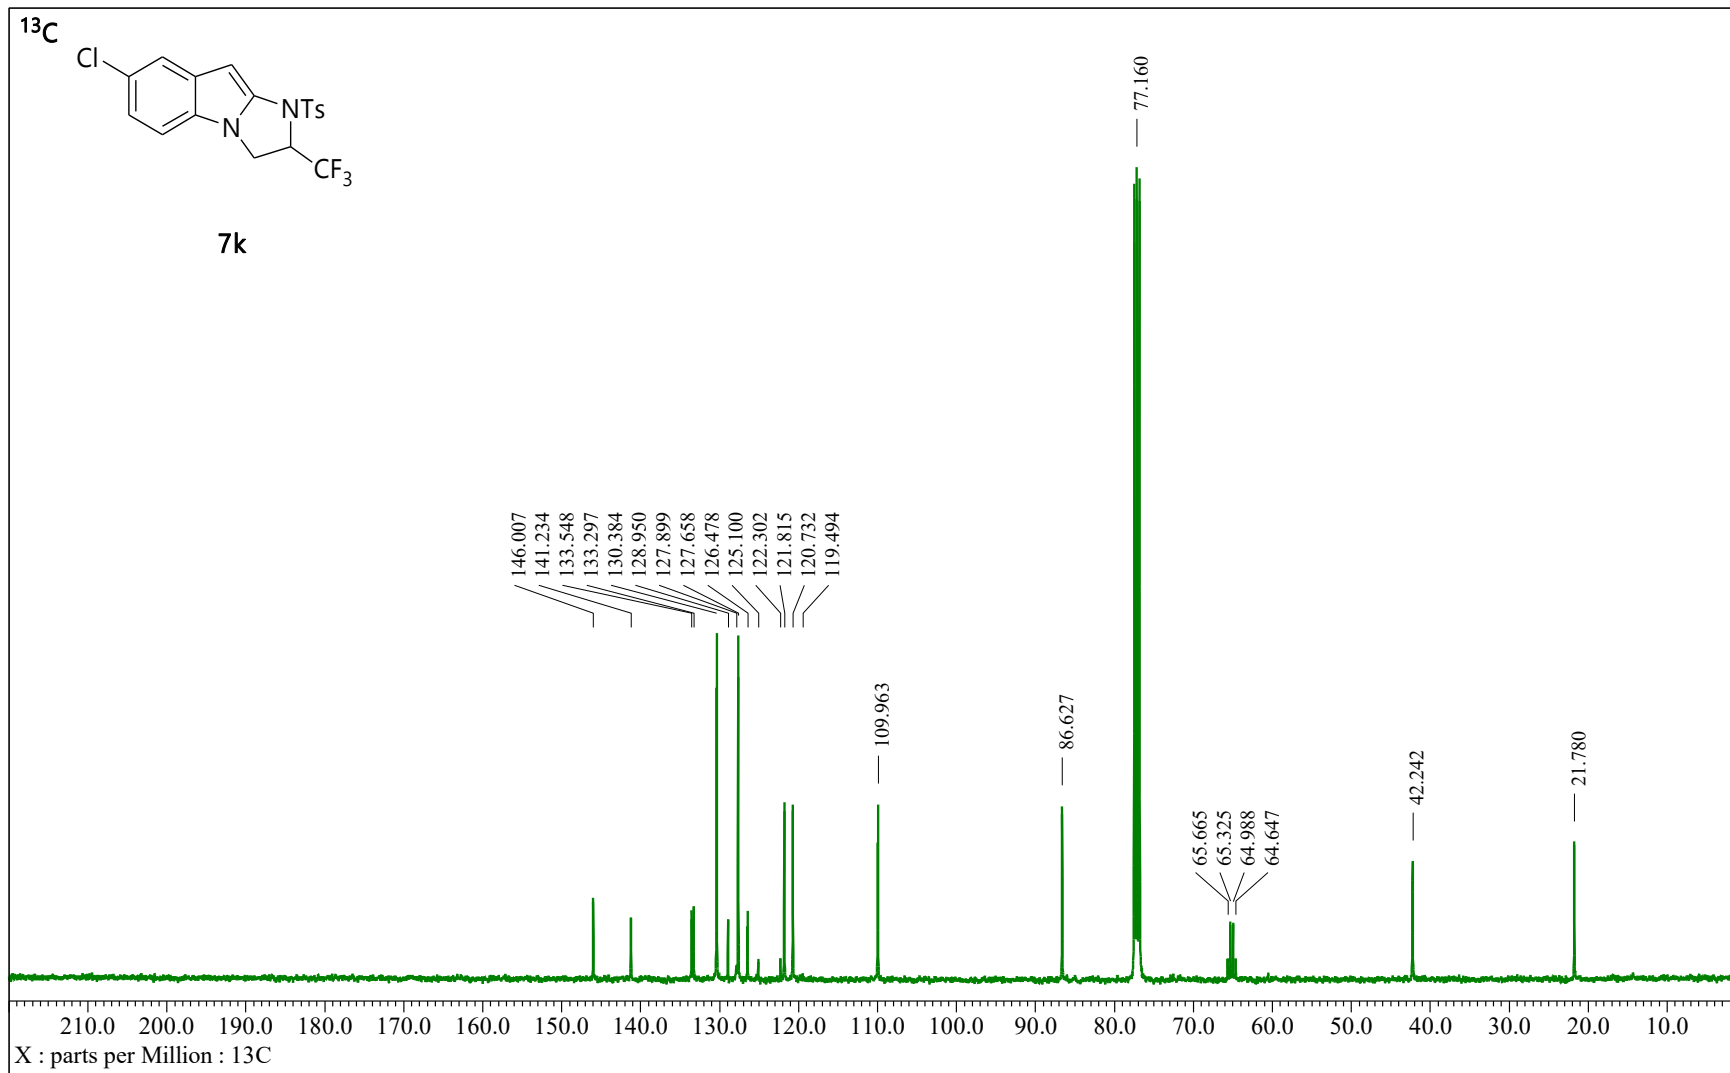

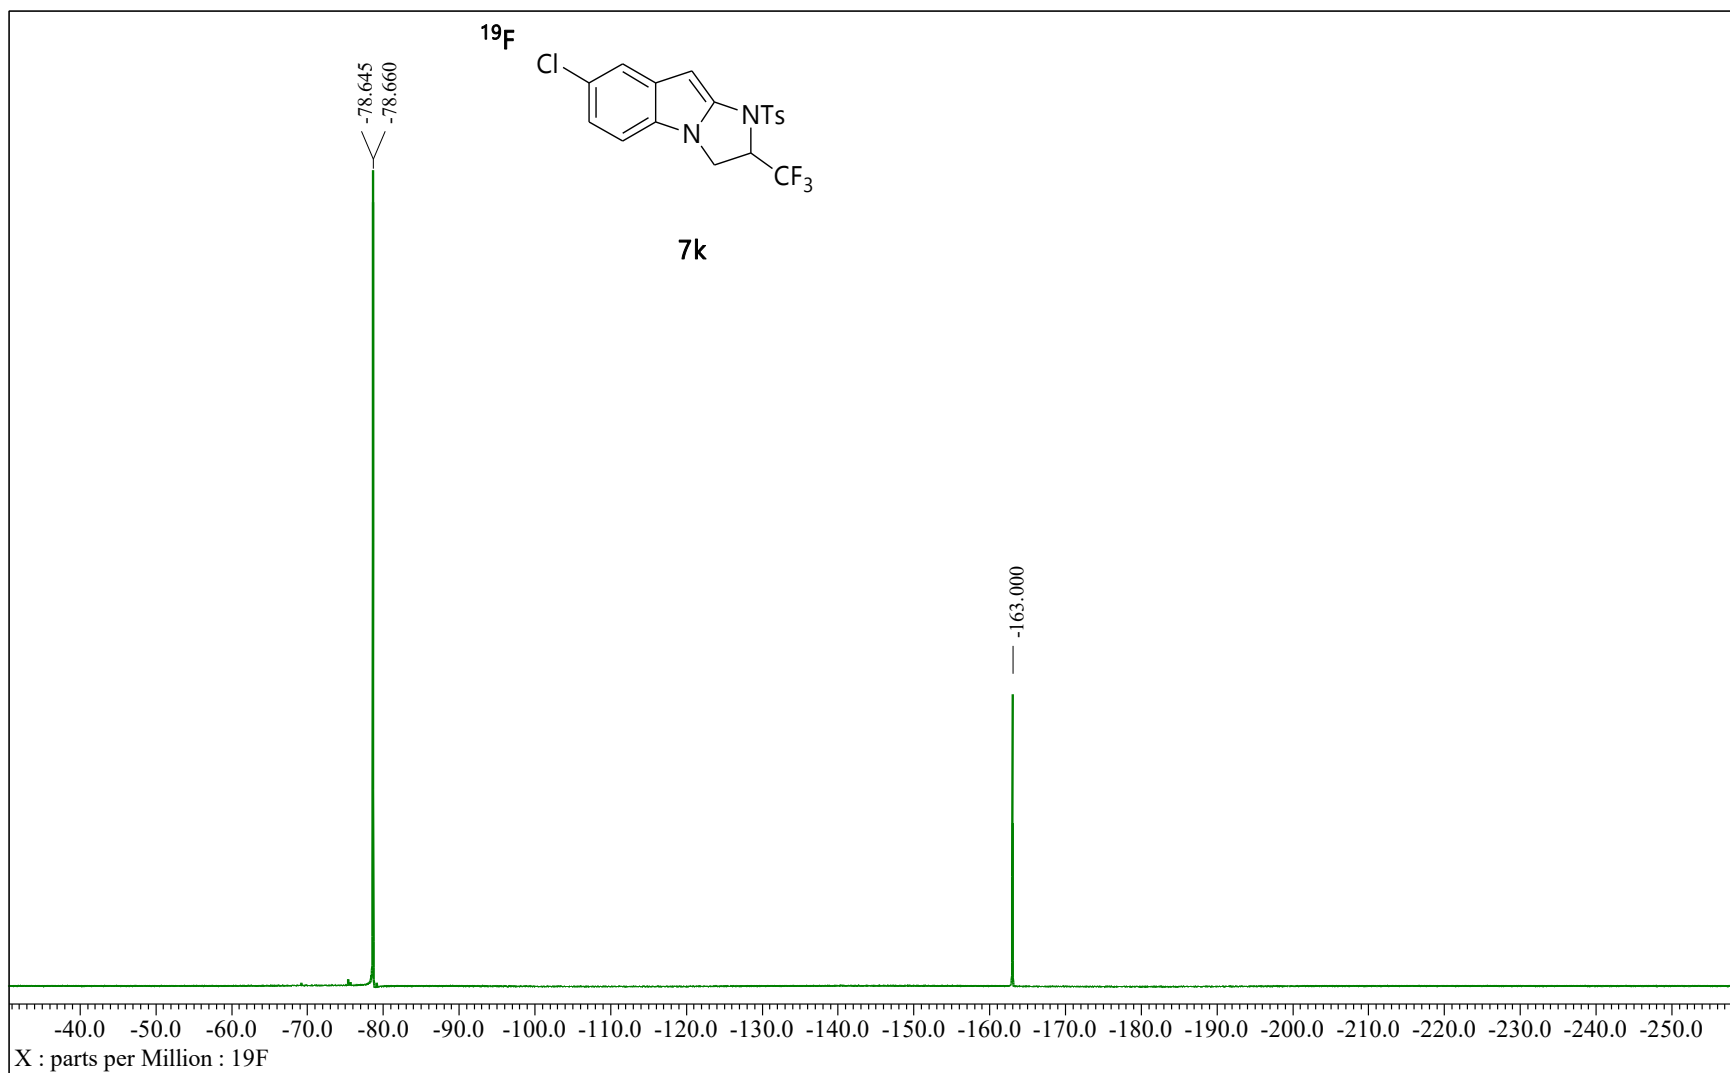

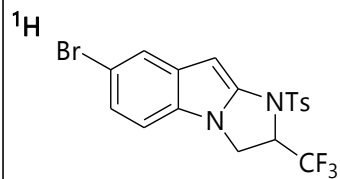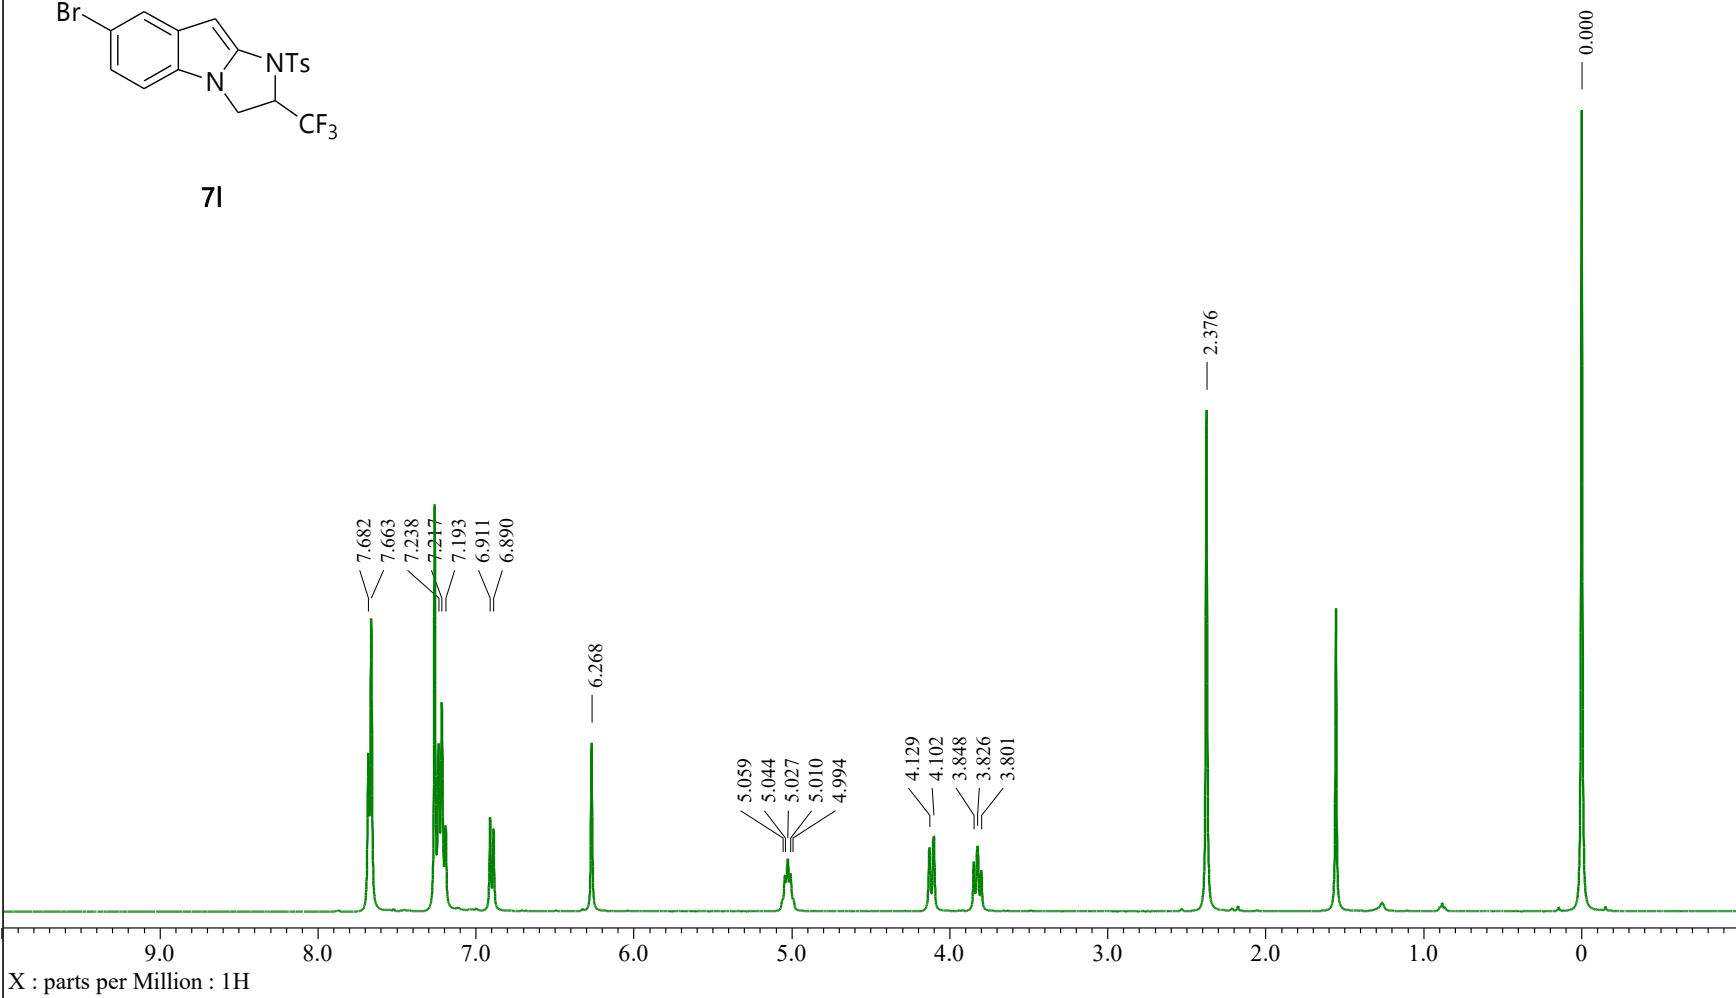

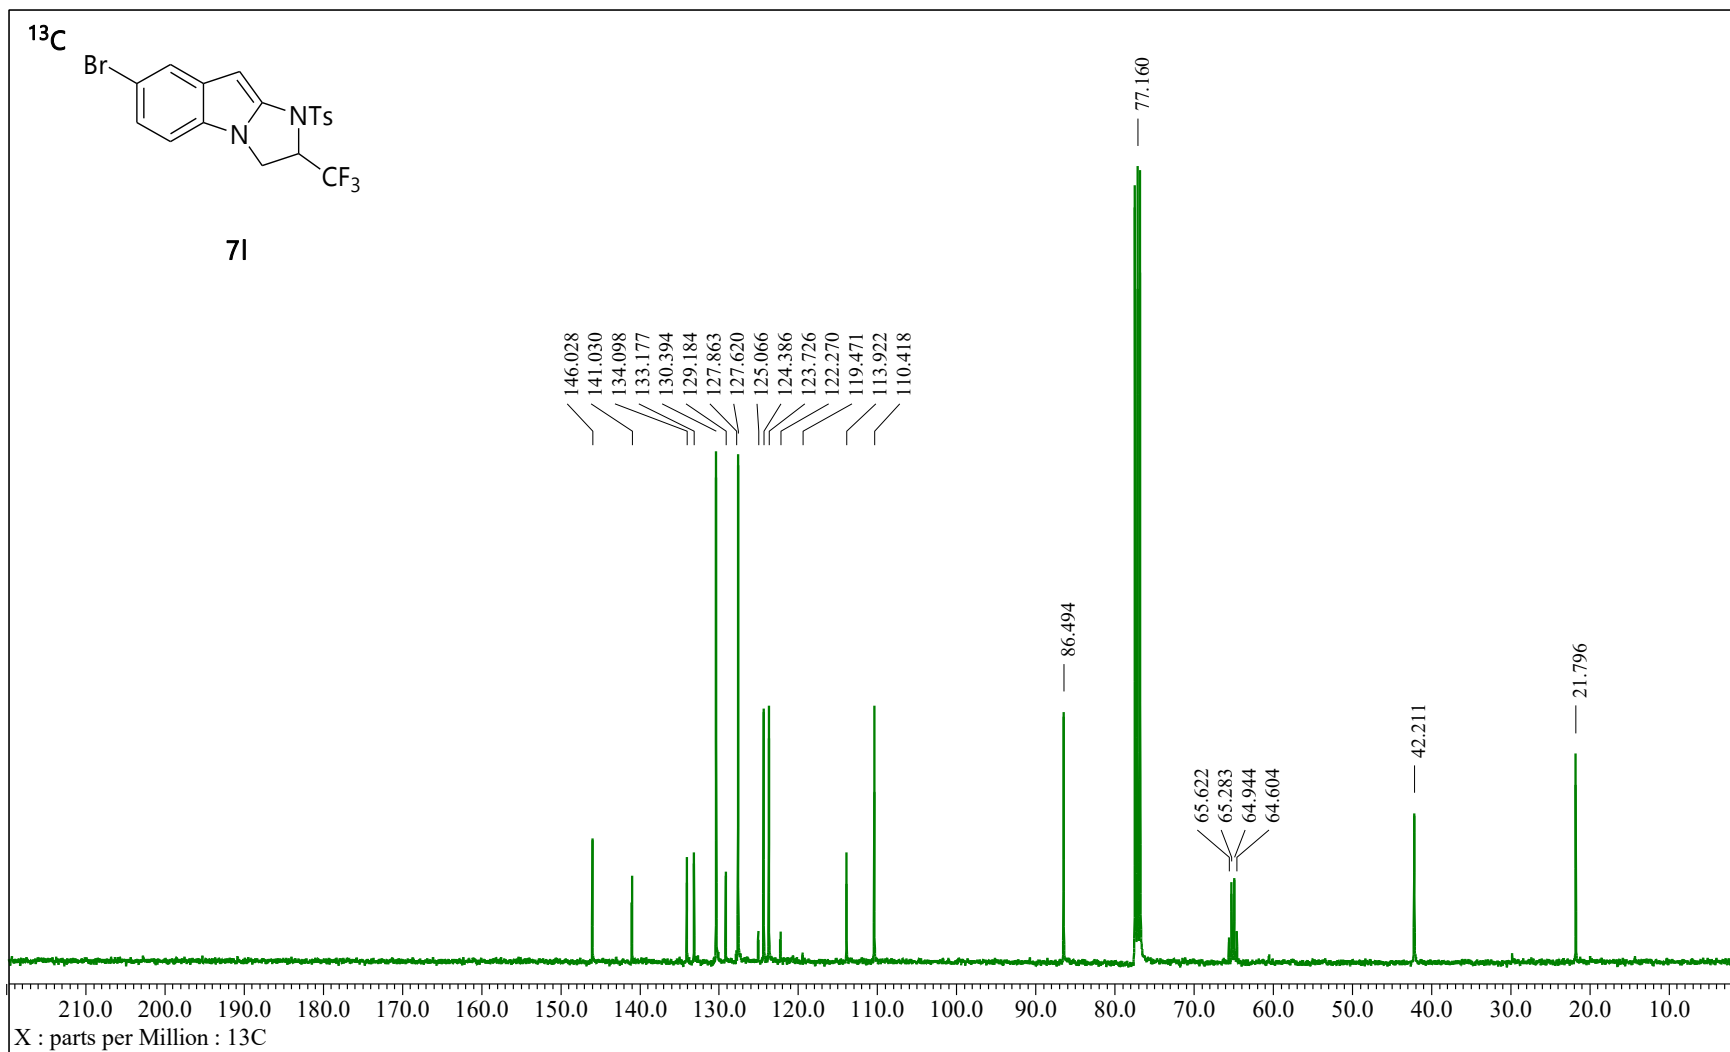

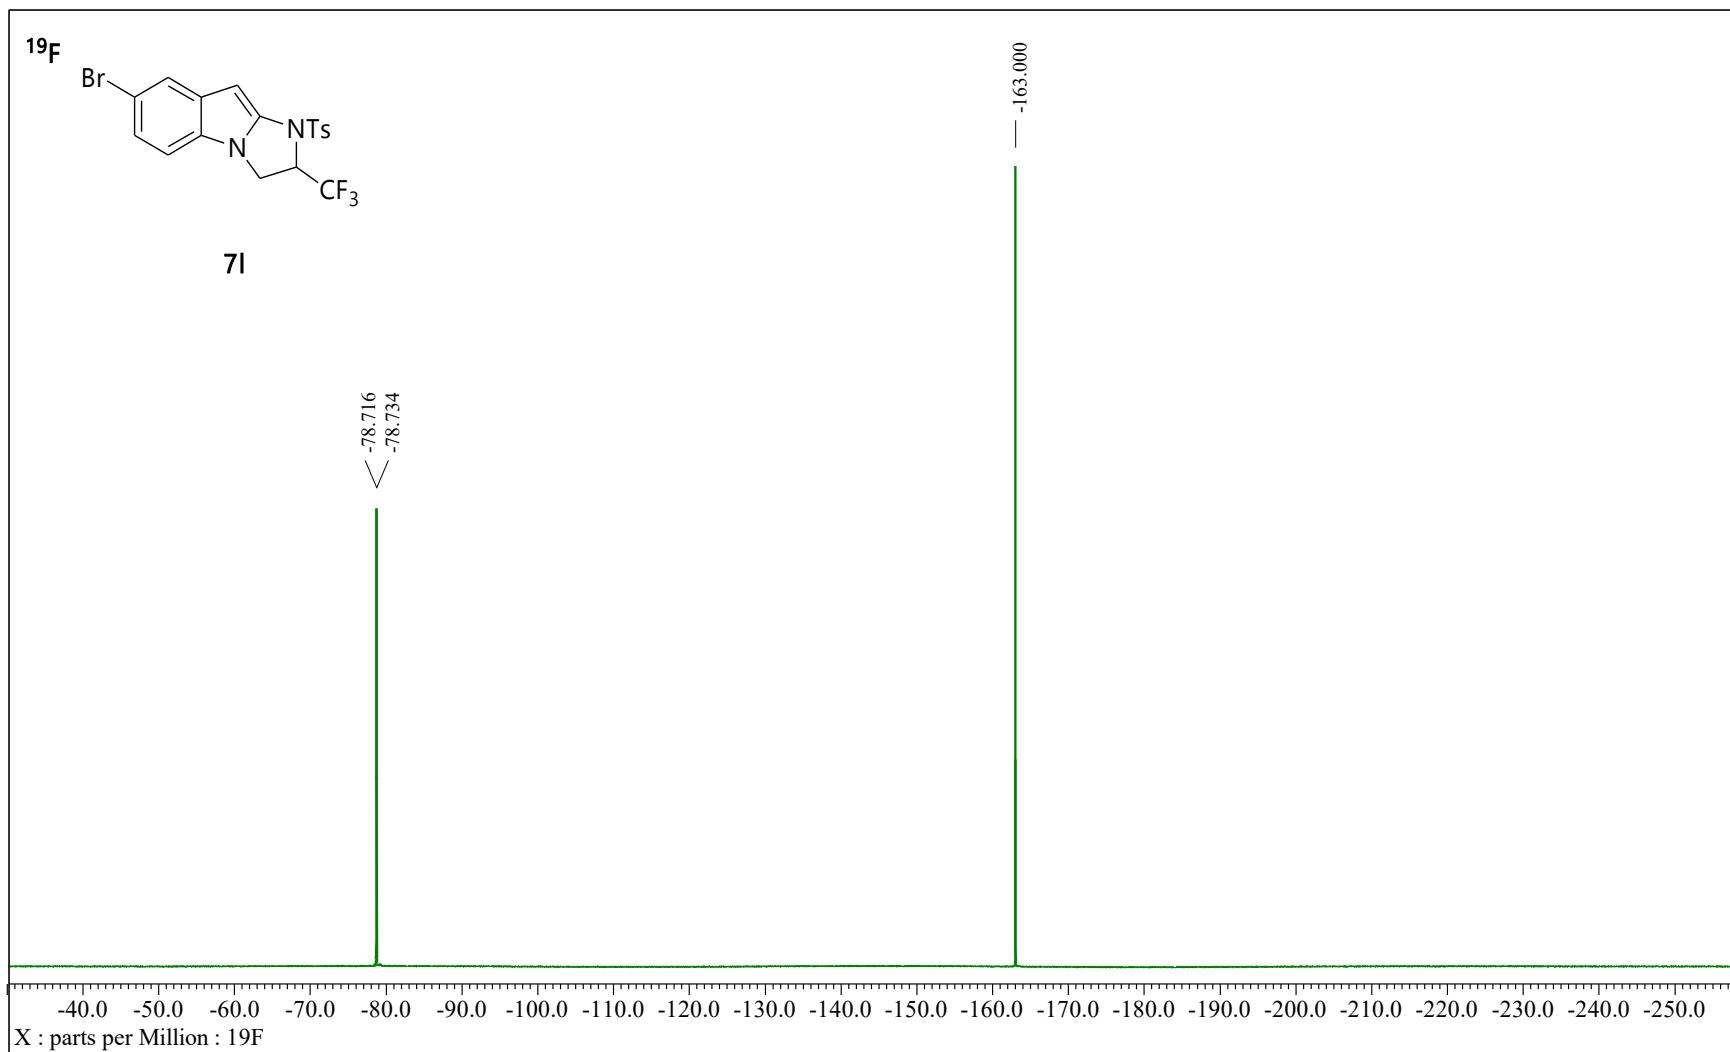

<sup>1</sup>H

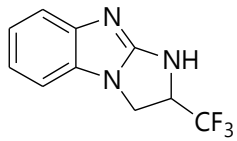

8a

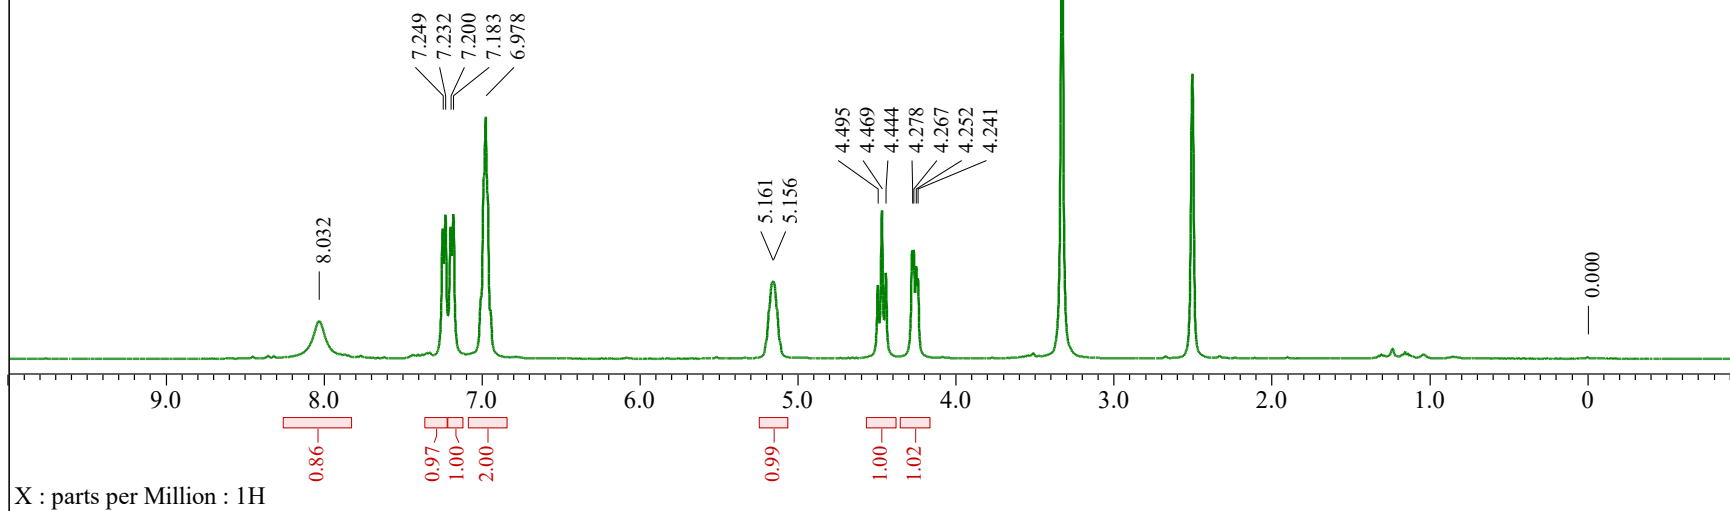

<sup>13</sup>C

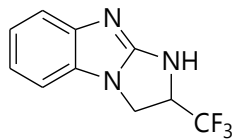

8a

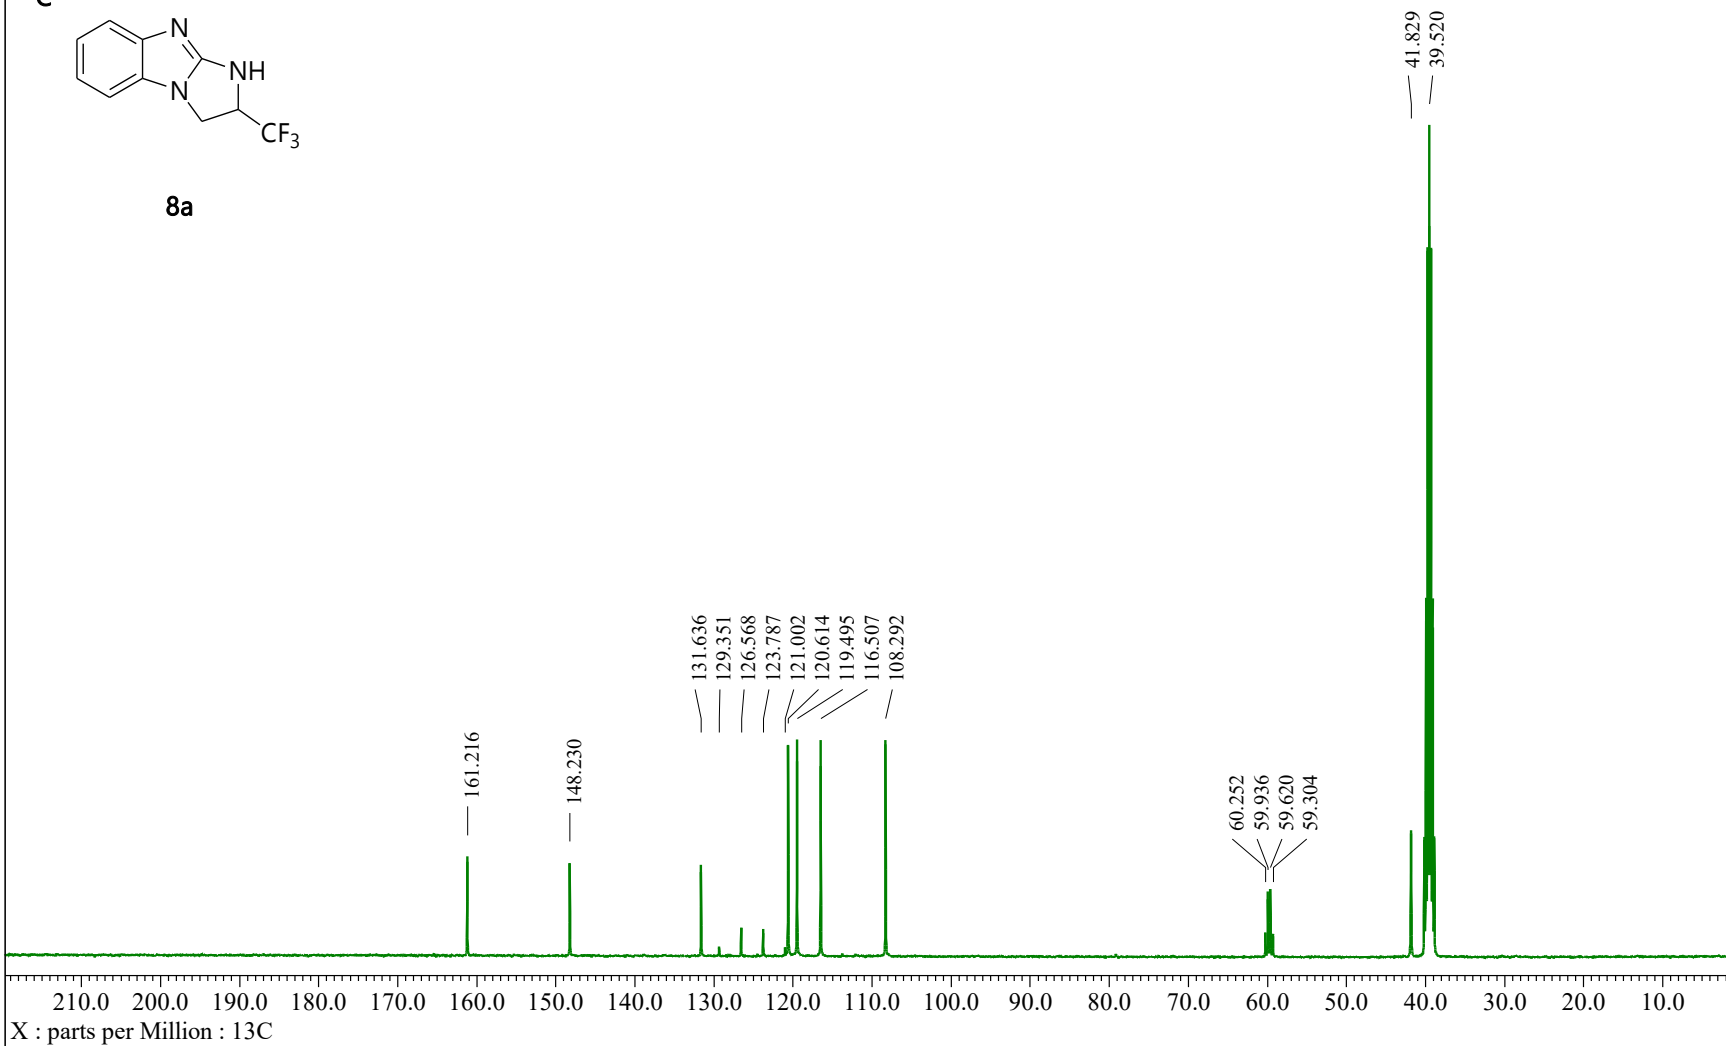

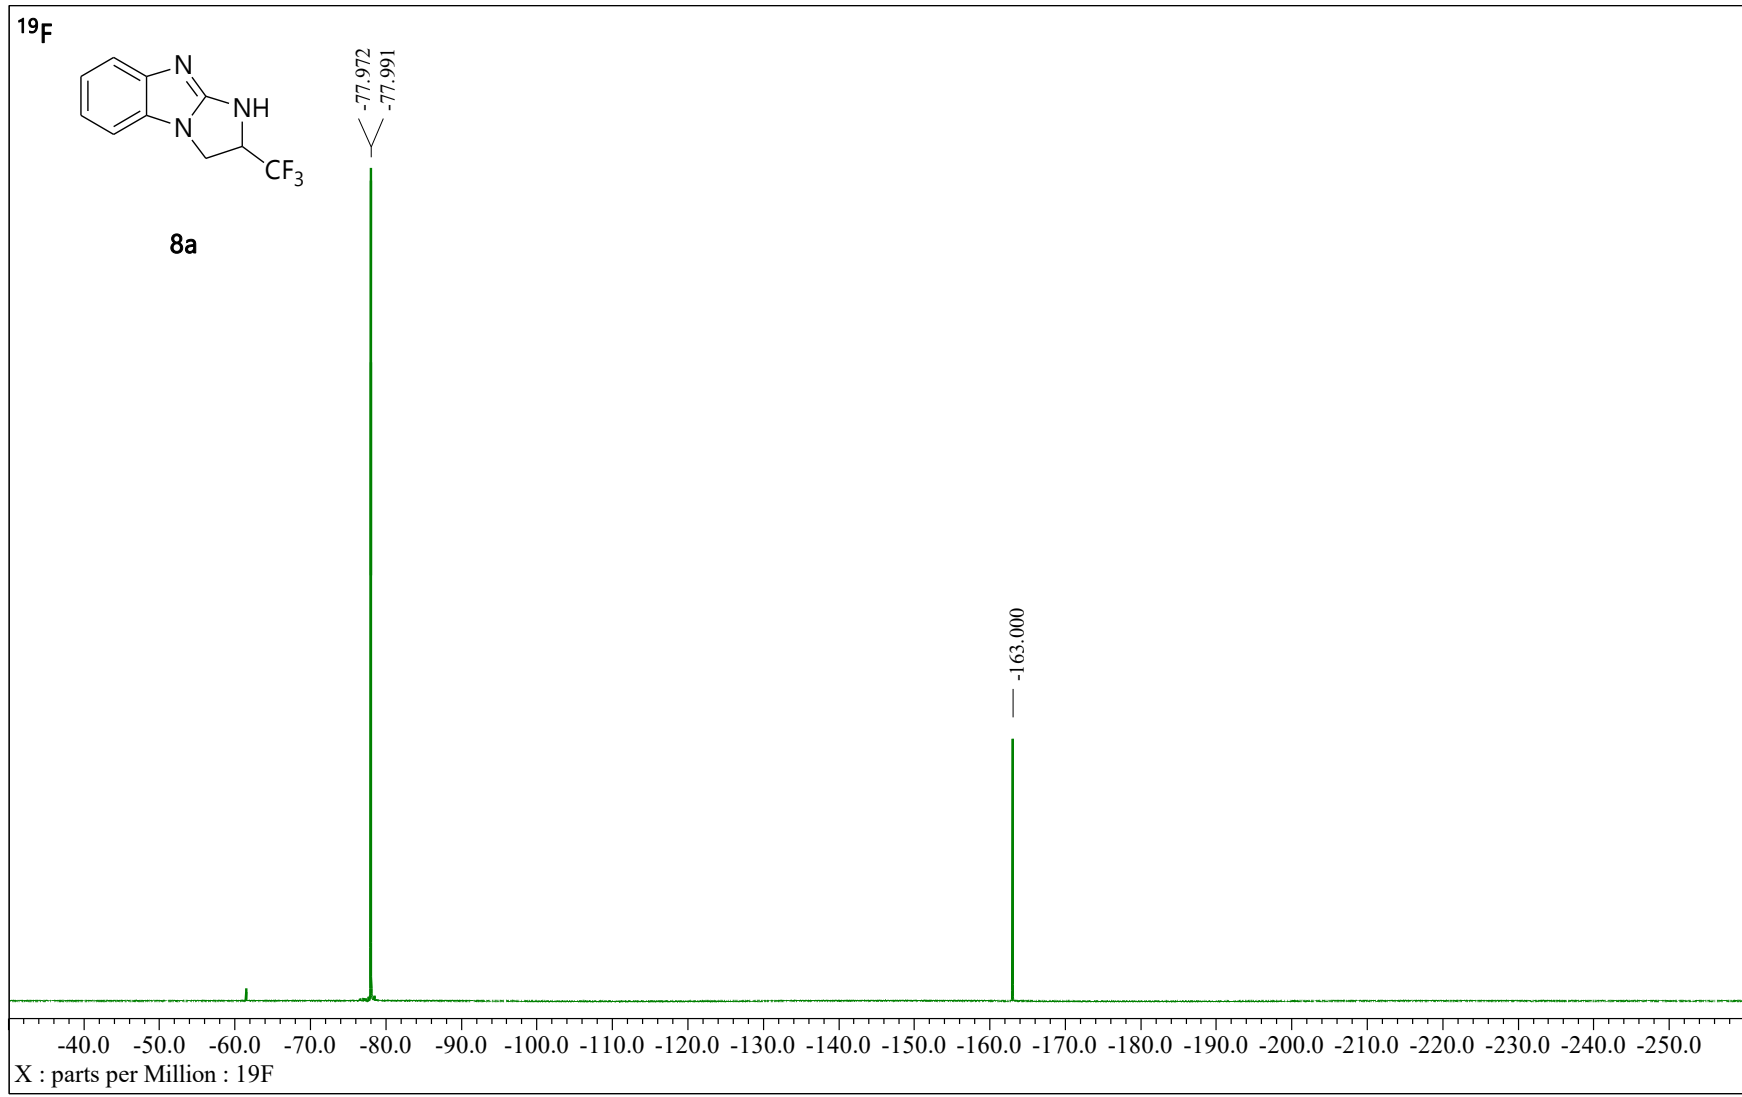

Supplement: d3ob01124k1.pdf [file d3ob01124k1.pdf]
